# Supplementary material
Source: PubMed Central journal article supplement (PMC3886853)

# Copper-Mediated Radical Trifluoromethylation of Unsaturated Potassium Organotrifluoroborates

## *Supporting Information*

Marc Presset,<sup>†,‡</sup> Daniel Oehrich,<sup>‡</sup> Frederik Rombouts<sup>\*,‡</sup> and Gary A. Molander<sup>\*,†</sup>

<sup>†</sup>Roy and Diana Vagelos Laboratories, Department of Chemistry, University of Pennsylvania, Philadelphia, Pennsylvania 19104-6323, United States, and <sup>‡</sup>Neuroscience Medicinal Chemistry, Research & Development, Janssen, Pharmaceutical Companies, Turnhoutseweg 30, 2340 Beerse, Belgium

frombout@its.jnj.com; gmolandr@sas.upenn.edu

### **Table of Contents:**

|                                                   |    |
|---------------------------------------------------|----|
| 1. General considerations.....                    | S2 |
| 2. Copies of GCMS monitoring and NMR spectra..... | S2 |

## 1. General considerations

All commercially available reagents, including anhydrous solvents were used without purification. In particular, Langlois' reagent ( $\text{NaSO}_2\text{CF}_3$ ), TBHP, CuCl and  $(\text{CH}_3\text{CN})_4\text{CuPF}_6$  were purchased. Potassium organotrifluoroborates **1a**, **1d**, **1e**, **1f**, **1j**, **3a** and **4a** are commercially available. Potassium organotrifluoroborates **1h**<sup>1</sup> and **1k**<sup>2</sup> were prepared according to reported procedures.

Analytical thin-layer chromatography (TLC) was performed on TLC silica gel plates (0.25 mm) precoated with a fluorescent indicator. Flash chromatography (FC) was performed on a Biotage SP4 base system using GRACE Reveleris columns (silica size 40  $\mu\text{m}$ ) of various sizes. Visualization was effected with ultraviolet light and ethanolic  $\text{KMnO}_4$ .

Melting points ( $^\circ\text{C}$ ) are uncorrected.  $^1\text{H}$  NMR chemical shifts were referenced to the residual solvent signal;  $^{13}\text{C}$  NMR chemical shifts were referenced to the deuterated solvent signal. Multiplicity was defined by DEPT 135 analysis. The resonance of the carbon center linked to the boron atom was not observed.  $^{19}\text{F}$  NMR chemical shifts were referenced to external  $\text{CFCl}_3$  (0.0 ppm).  $^{11}\text{B}$  NMR chemical shifts were referenced to external  $\text{BF}_3\cdot\text{OEt}_2$  (0.0 ppm) with a negative sign indicating an upfield shift. Data are presented as follows: chemical shift  $\delta$  (ppm), multiplicity (*s* = singlet, *d* = doublet, *t* = triplet, *m* = multiplet, *br* = broad), coupling constant *J* (Hz), integration.

High-resolution mass spectra were obtained by electrospray ionization on a TOF instrument. Capillary GC-MS was carried out on a gas chromatograph, equipped with a split/splitless injection port, interfaced with an inert mass-selective detector. A DB-5MS fused silica capillary column was used; dimensions of the column were 30 m x 0.25 mm i.d., 0.25  $\mu\text{m}$  film thickness. Ultra high purity helium with an in-line oxygen trap was used as carrier gas. The carrier gas-line pressure was set at a flow of 15 ml /min and column head pressure at 13 psi. Temperature of the injector was maintained at 250  $^\circ\text{C}$ . The injected sample volume was 0.1  $\mu\text{L}$  in the split mode with 10:1 split ratio. The interface temperature was held at 280  $^\circ\text{C}$ . Oven program was: initial temperature of 50  $^\circ\text{C}$  raised to 280  $^\circ\text{C}$  at a rate of 24  $^\circ\text{C}/\text{min}$  with a final isotherm of 5 min. Mass spectrometer was used with an electron impact ionization energy of 70 eV.

## 2. Copies of GCMS monitoring and NMR spectra

---

<sup>1</sup> Molander, G. A.; Cavalcanti, L.; Garcia-Garcia, C. *J. Org. Chem.* **2013**, 78, 6427.

<sup>2</sup> Molander, G. A.; Canturk, B.; Kennedy, L. E. *J. Org. Chem.* **2009**, 74, 973.

Copies of  $^1\text{H}$ ,  $^{13}\text{C}$ ,  $^{11}\text{B}$  and  $^{19}\text{F}$  NMR spectra for compounds **1b**, **1c**, **1g**, **1h**, **1i**, **1k**, **3b**, **4b**, **4c**, **4d**, **4e**.

Copies of  $^{19}\text{F}$  and GCMS monitoring for all products;  $^1\text{H}$ ,  $^{13}\text{C}$ , Dept 135,  $^{11}\text{B}$  and  $^{19}\text{F}$  NMR spectra for all new products.

|                       |         |                      |                |                      |         |                        |                     |
|-----------------------|---------|----------------------|----------------|----------------------|---------|------------------------|---------------------|
| Frequency (MHz)       | 400.40  | Nucleus              | 1H             | Number of Transients | 16      | Origin                 | Bruker BioSpin GmbH |
| Original Points Count | 32768   | Owner                | tibbe_operator | Points Count         | 32768   | SW(cyclical) (Hz)      | 7211.32             |
| Solvent               | DMSO-d6 | Spectrum Offset (Hz) | 3397.9224      | Sweep Width (Hz)     | 7211.10 | Temperature (degree C) | 26.800              |

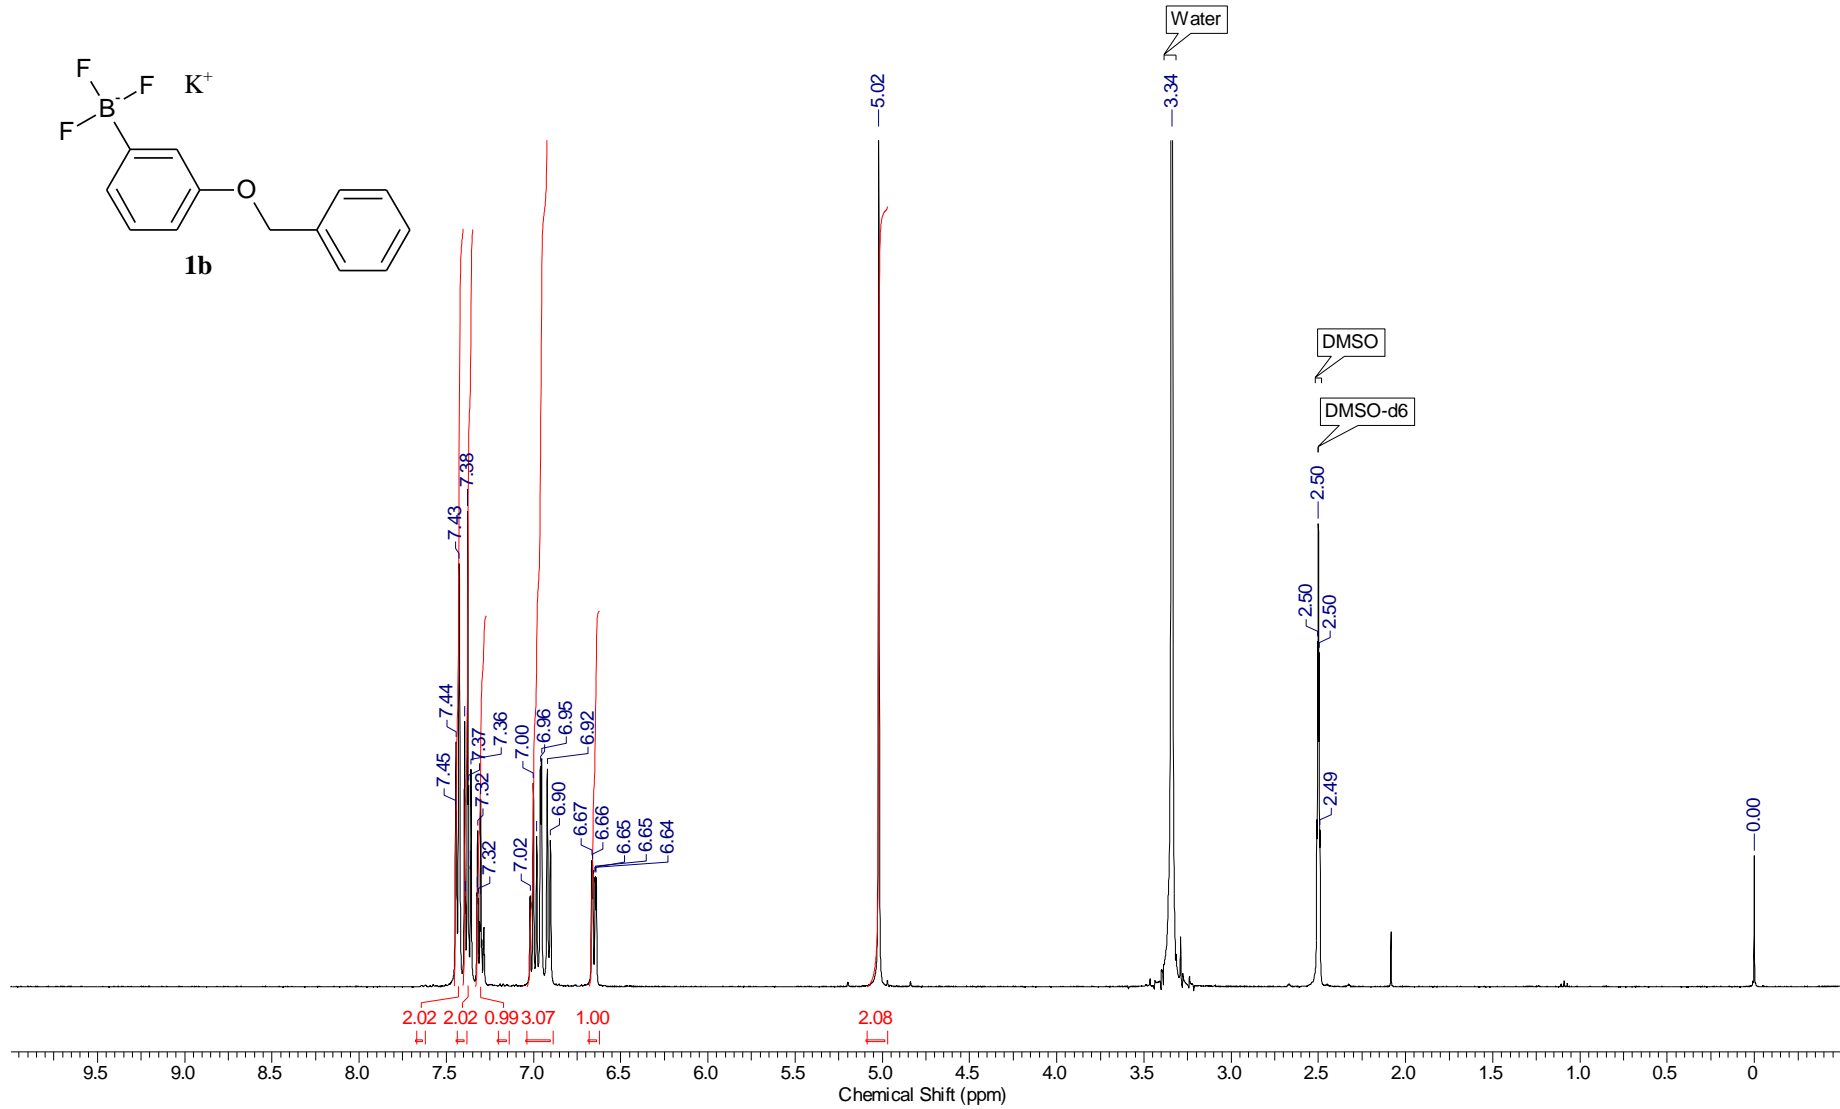

|                              |         |                             |                 |                             |          |                               |                     |
|------------------------------|---------|-----------------------------|-----------------|-----------------------------|----------|-------------------------------|---------------------|
| <b>Frequency (MHz)</b>       | 100.69  | <b>Nucleus</b>              | <sup>13</sup> C | <b>Number of Transients</b> | 1024     | <b>Origin</b>                 | Bruker BioSpin GmbH |
| <b>Original Points Count</b> | 32768   | <b>Owner</b>                | tibbe_operator  | <b>Points Count</b>         | 32768    | <b>SW(cyclical) (Hz)</b>      | 24037.73            |
| <b>Solvent</b>               | DMSO-d6 | <b>Spectrum Offset (Hz)</b> | 10019.6328      | <b>Sweep Width (Hz)</b>     | 24036.99 | <b>Temperature (degree C)</b> | 27.000              |

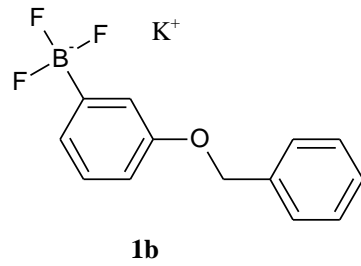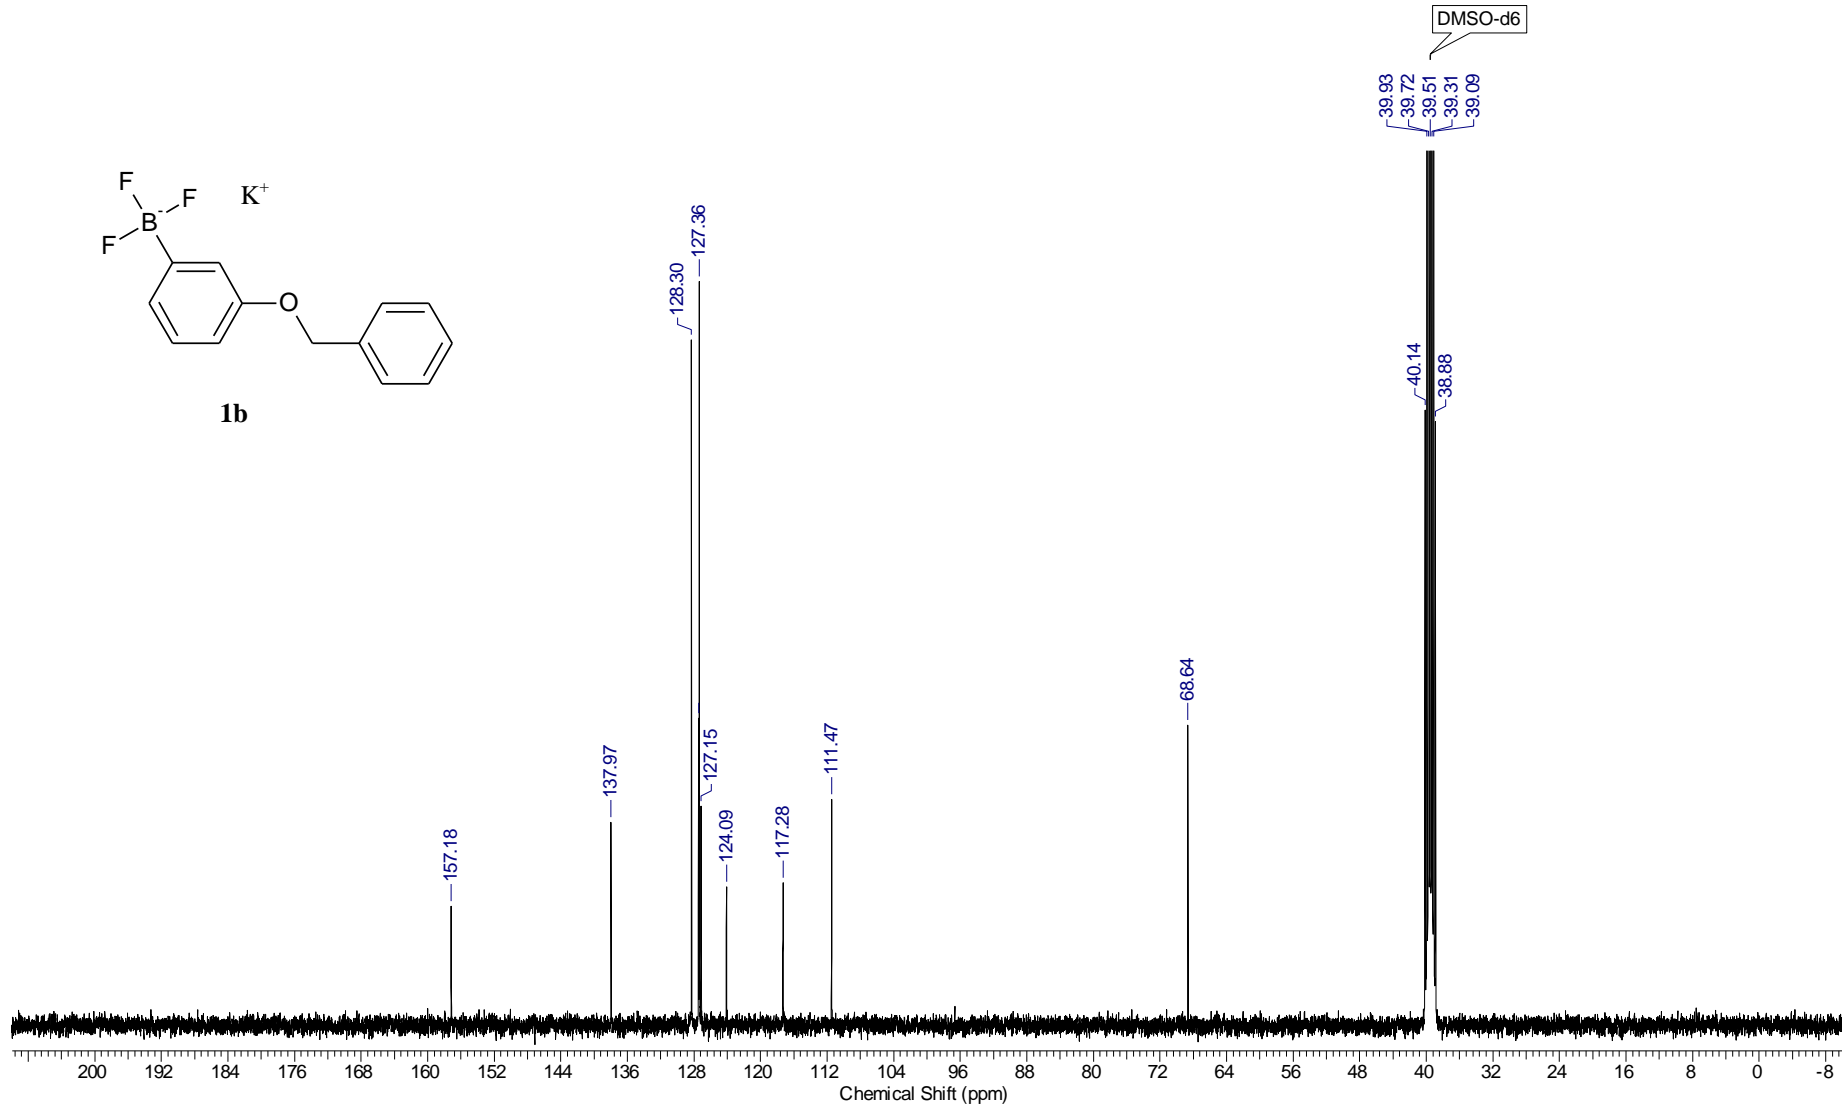

|                              |         |                             |                |                             |          |                               |                     |
|------------------------------|---------|-----------------------------|----------------|-----------------------------|----------|-------------------------------|---------------------|
| <b>Frequency (MHz)</b>       | 128.46  | <b>Nucleus</b>              | 11B            | <b>Number of Transients</b> | 128      | <b>Origin</b>                 | Bruker BioSpin GmbH |
| <b>Original Points Count</b> | 32768   | <b>Owner</b>                | tibbe_operator | <b>Points Count</b>         | 32768    | <b>SW(cyclical) (Hz)</b>      | 25509.43            |
| <b>Solvent</b>               | DMSO-d6 | <b>Spectrum Offset (Hz)</b> | 1.2842         | <b>Sweep Width (Hz)</b>     | 25508.65 | <b>Temperature (degree C)</b> | 27.000              |

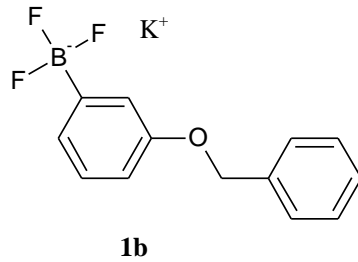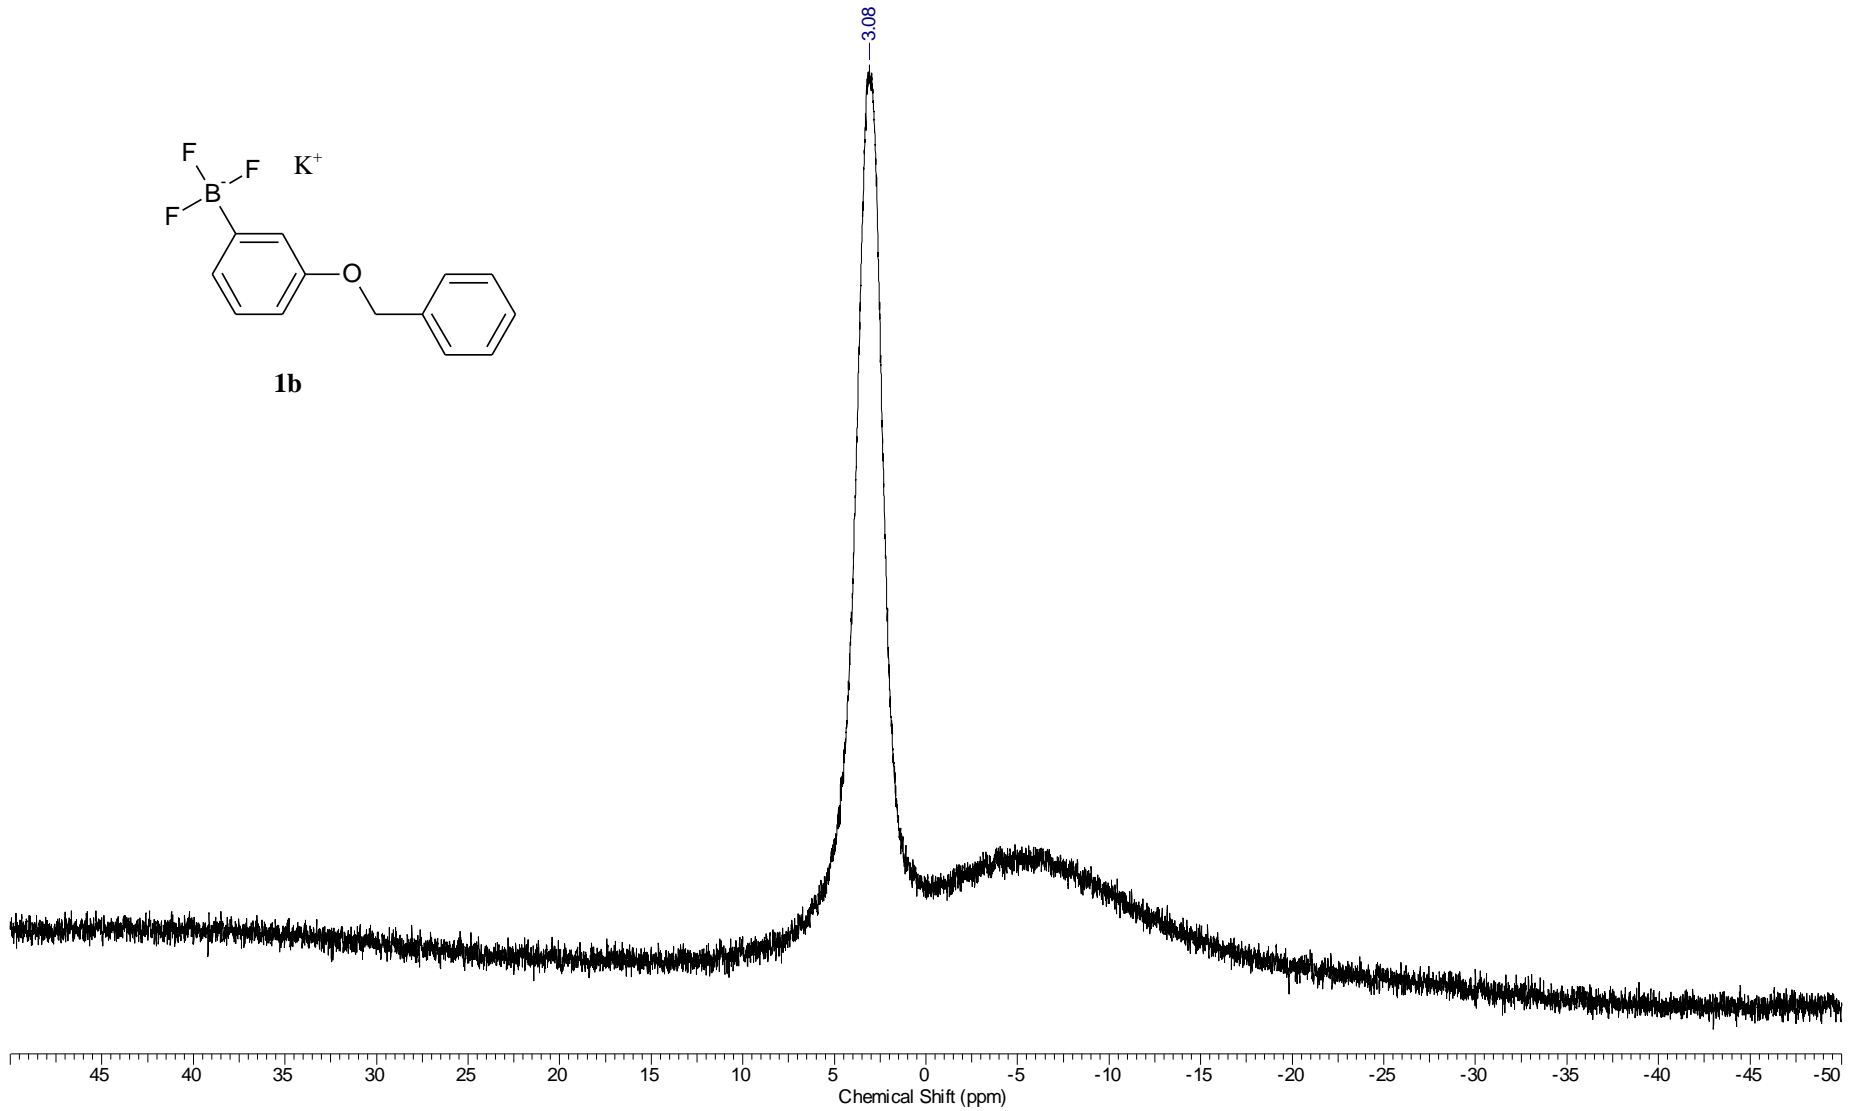

|                       |         |                      |                 |                      |          |                        |                     |
|-----------------------|---------|----------------------|-----------------|----------------------|----------|------------------------|---------------------|
| Frequency (MHz)       | 376.71  | Nucleus              | <sup>19</sup> F | Number of Transients | 64       | Origin                 | Bruker BioSpin GmbH |
| Original Points Count | 131072  | Owner                | tibbe_operator  | Points Count         | 131072   | SW(cyclical) (Hz)      | 93749.28            |
| Solvent               | DMSO-d6 | Spectrum Offset (Hz) | -37674.7617     | Sweep Width (Hz)     | 93748.56 | Temperature (degree C) | 27.000              |

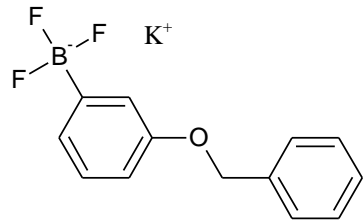

1b

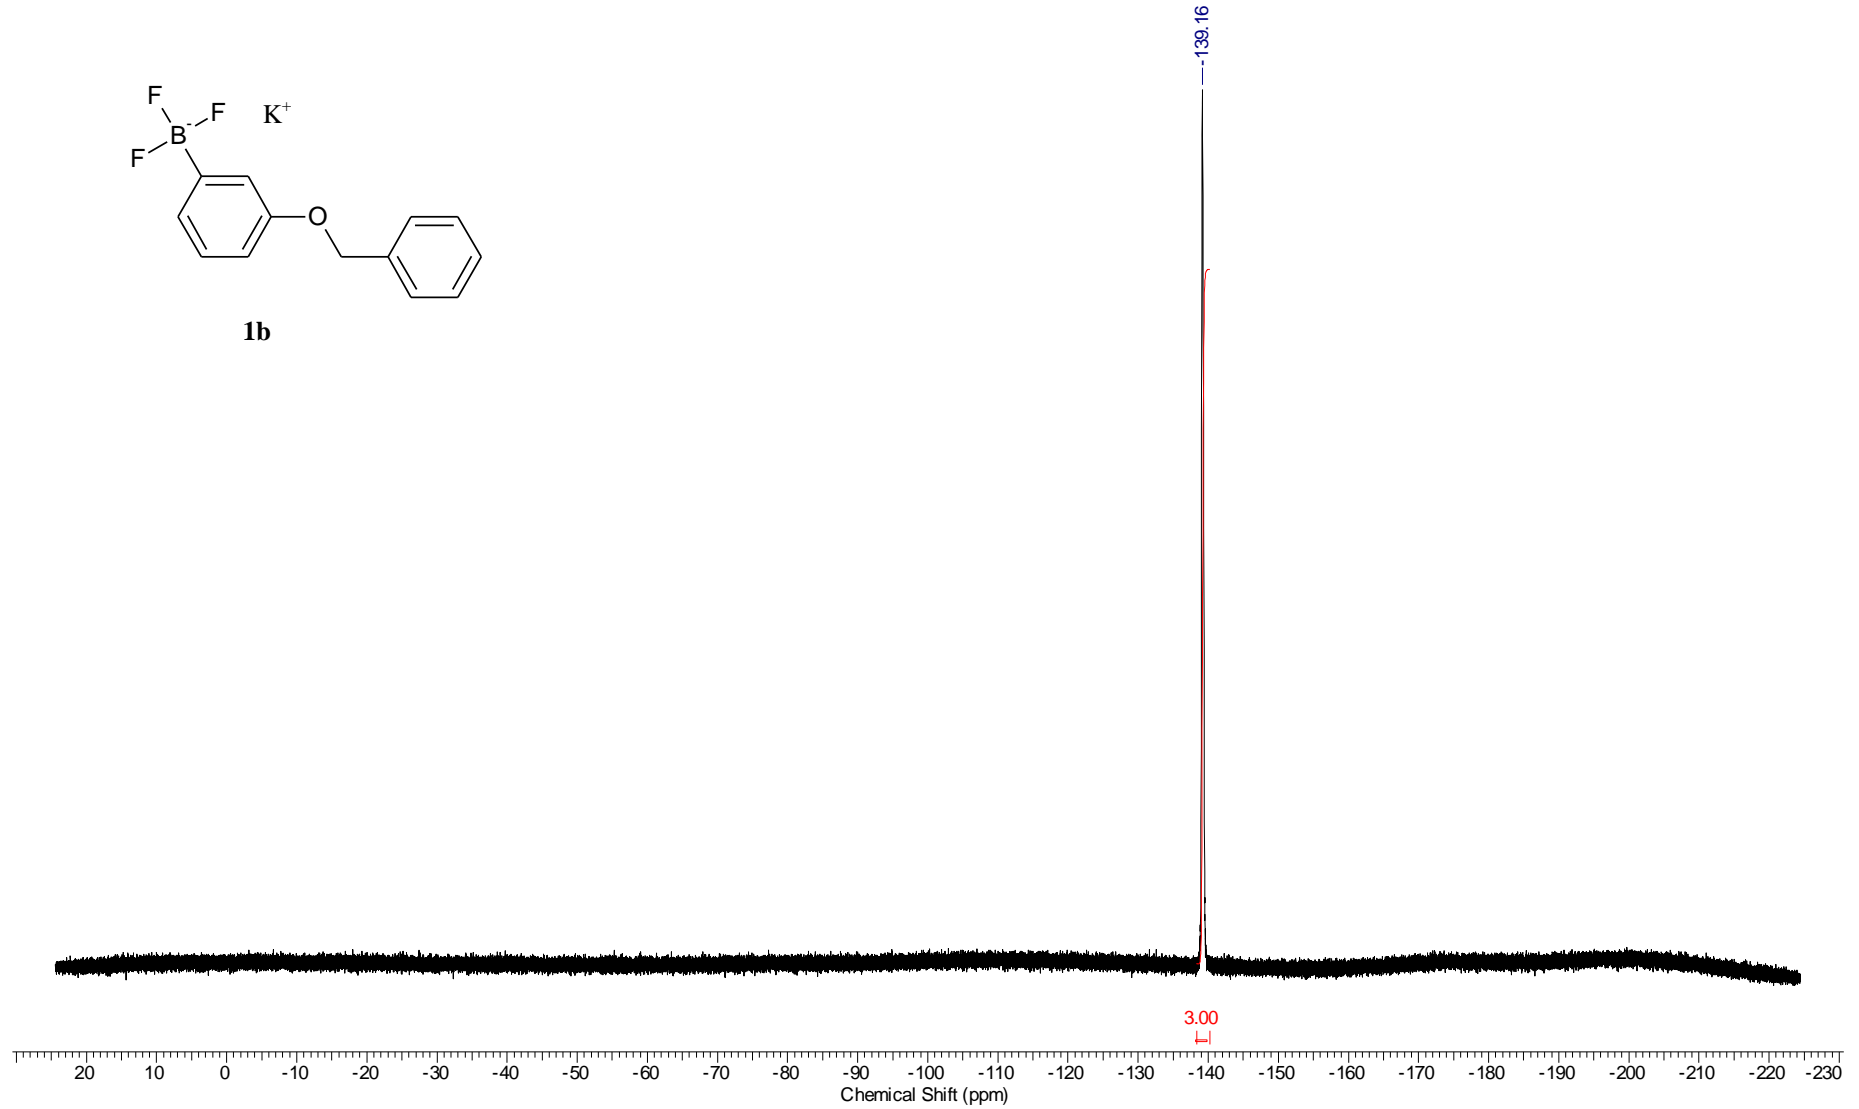

|                       |         |                      |                |                      |         |                        |                     |
|-----------------------|---------|----------------------|----------------|----------------------|---------|------------------------|---------------------|
| Frequency (MHz)       | 400.40  | Nucleus              | 1H             | Number of Transients | 16      | Origin                 | Bruker BioSpin GmbH |
| Original Points Count | 32768   | Owner                | tibbe_operator | Points Count         | 32768   | SW(cyclical) (Hz)      | 7211.32             |
| Solvent               | DMSO-d6 | Spectrum Offset (Hz) | 3398.3625      | Sweep Width (Hz)     | 7211.10 | Temperature (degree C) | 27.000              |

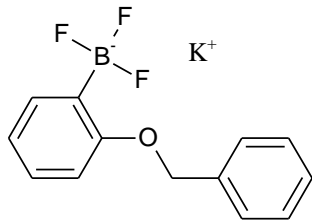

**1c**

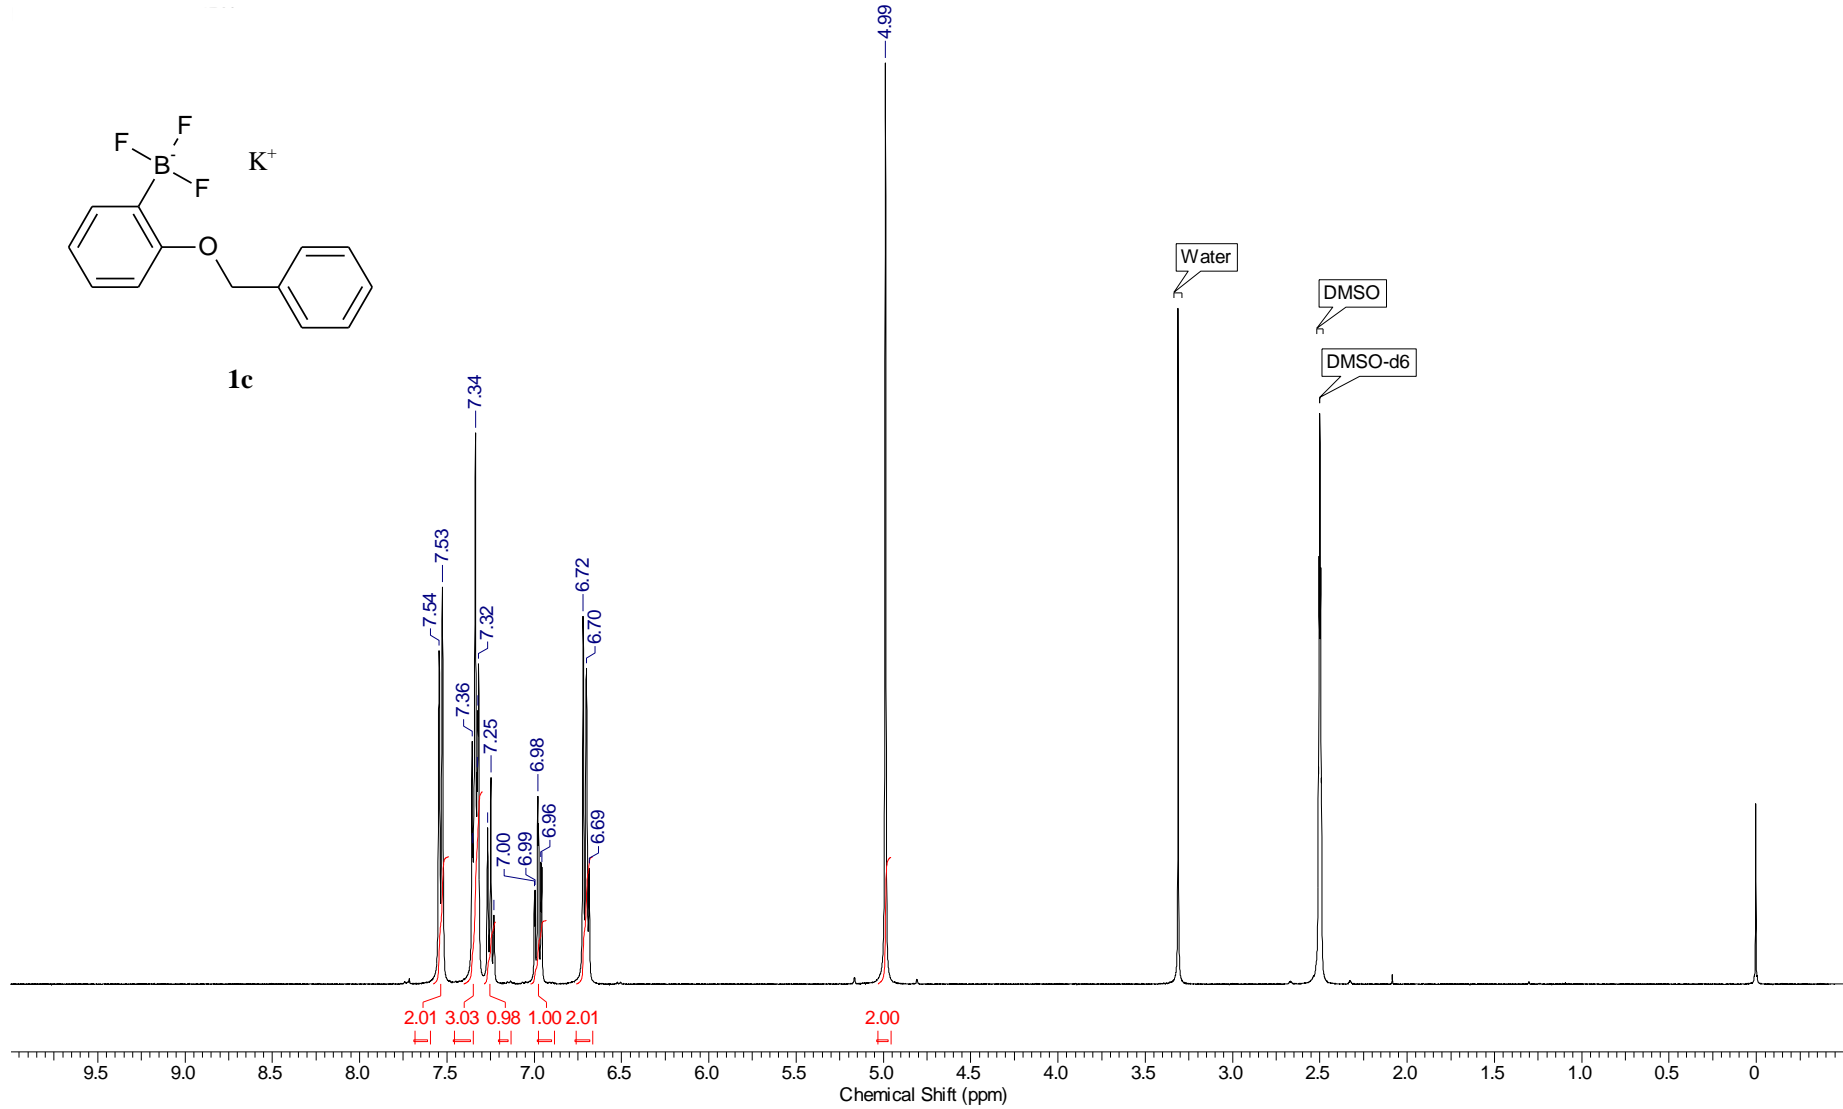



|                       |         |                      |                 |                      |          |                        |                     |
|-----------------------|---------|----------------------|-----------------|----------------------|----------|------------------------|---------------------|
| Frequency (MHz)       | 100.69  | Nucleus              | <sup>13</sup> C | Number of Transients | 1024     | Origin                 | Bruker BioSpin GmbH |
| Original Points Count | 32768   | Owner                | tibbe_operator  | Points Count         | 32768    | SW(cyclical) (Hz)      | 24037.73            |
| Solvent               | DMSO-d6 | Spectrum Offset (Hz) | 10015.9648      | Sweep Width (Hz)     | 24036.99 | Temperature (degree C) | 27.000              |

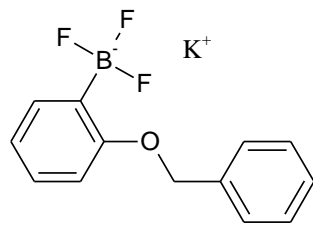

**1c**

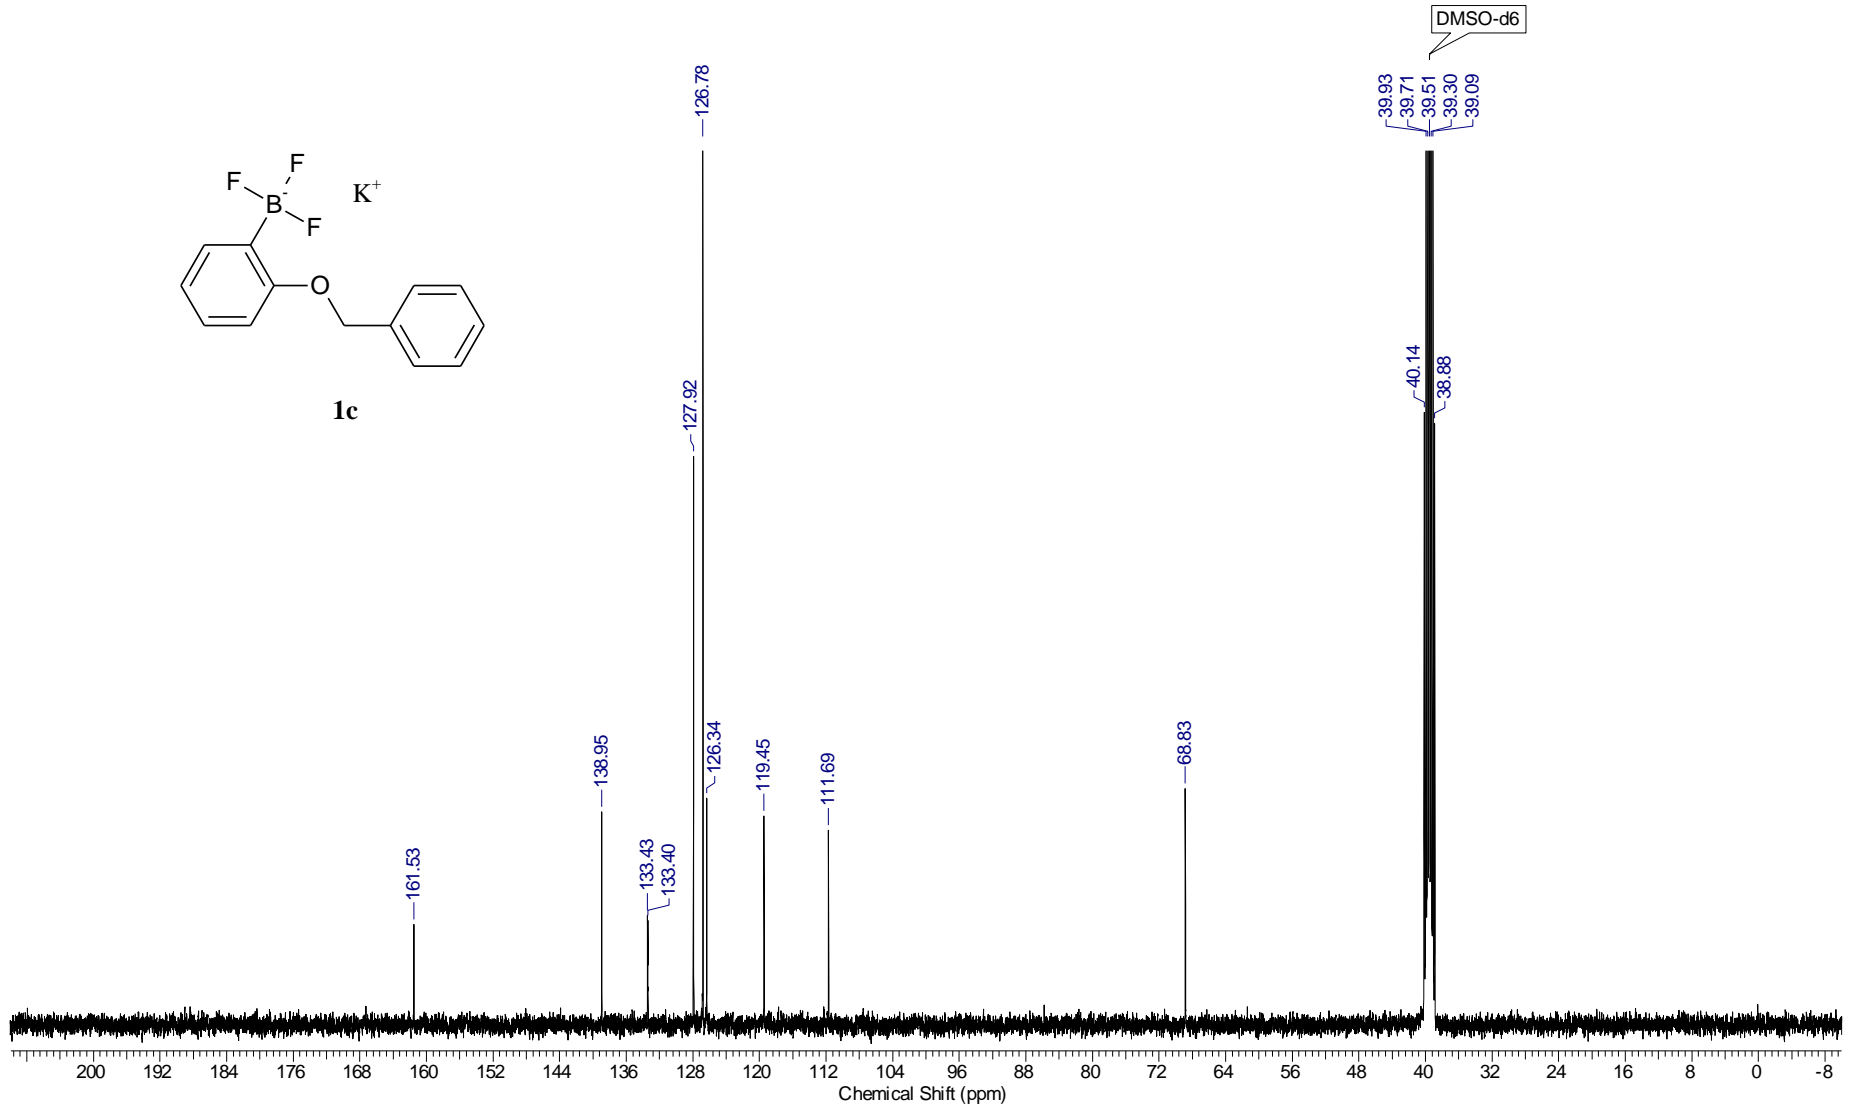

|                       |         |                      |                |                      |          |                        |                     |
|-----------------------|---------|----------------------|----------------|----------------------|----------|------------------------|---------------------|
| Frequency (MHz)       | 128.46  | Nucleus              | 11B            | Number of Transients | 128      | Origin                 | Bruker BioSpin GmbH |
| Original Points Count | 32768   | Owner                | tibbe_operator | Points Count         | 32768    | SW(cyclical) (Hz)      | 25509.43            |
| Solvent               | DMSO-d6 | Spectrum Offset (Hz) | 1.2842         | Sweep Width (Hz)     | 25508.65 | Temperature (degree C) | 27.000              |

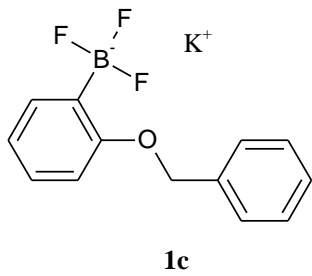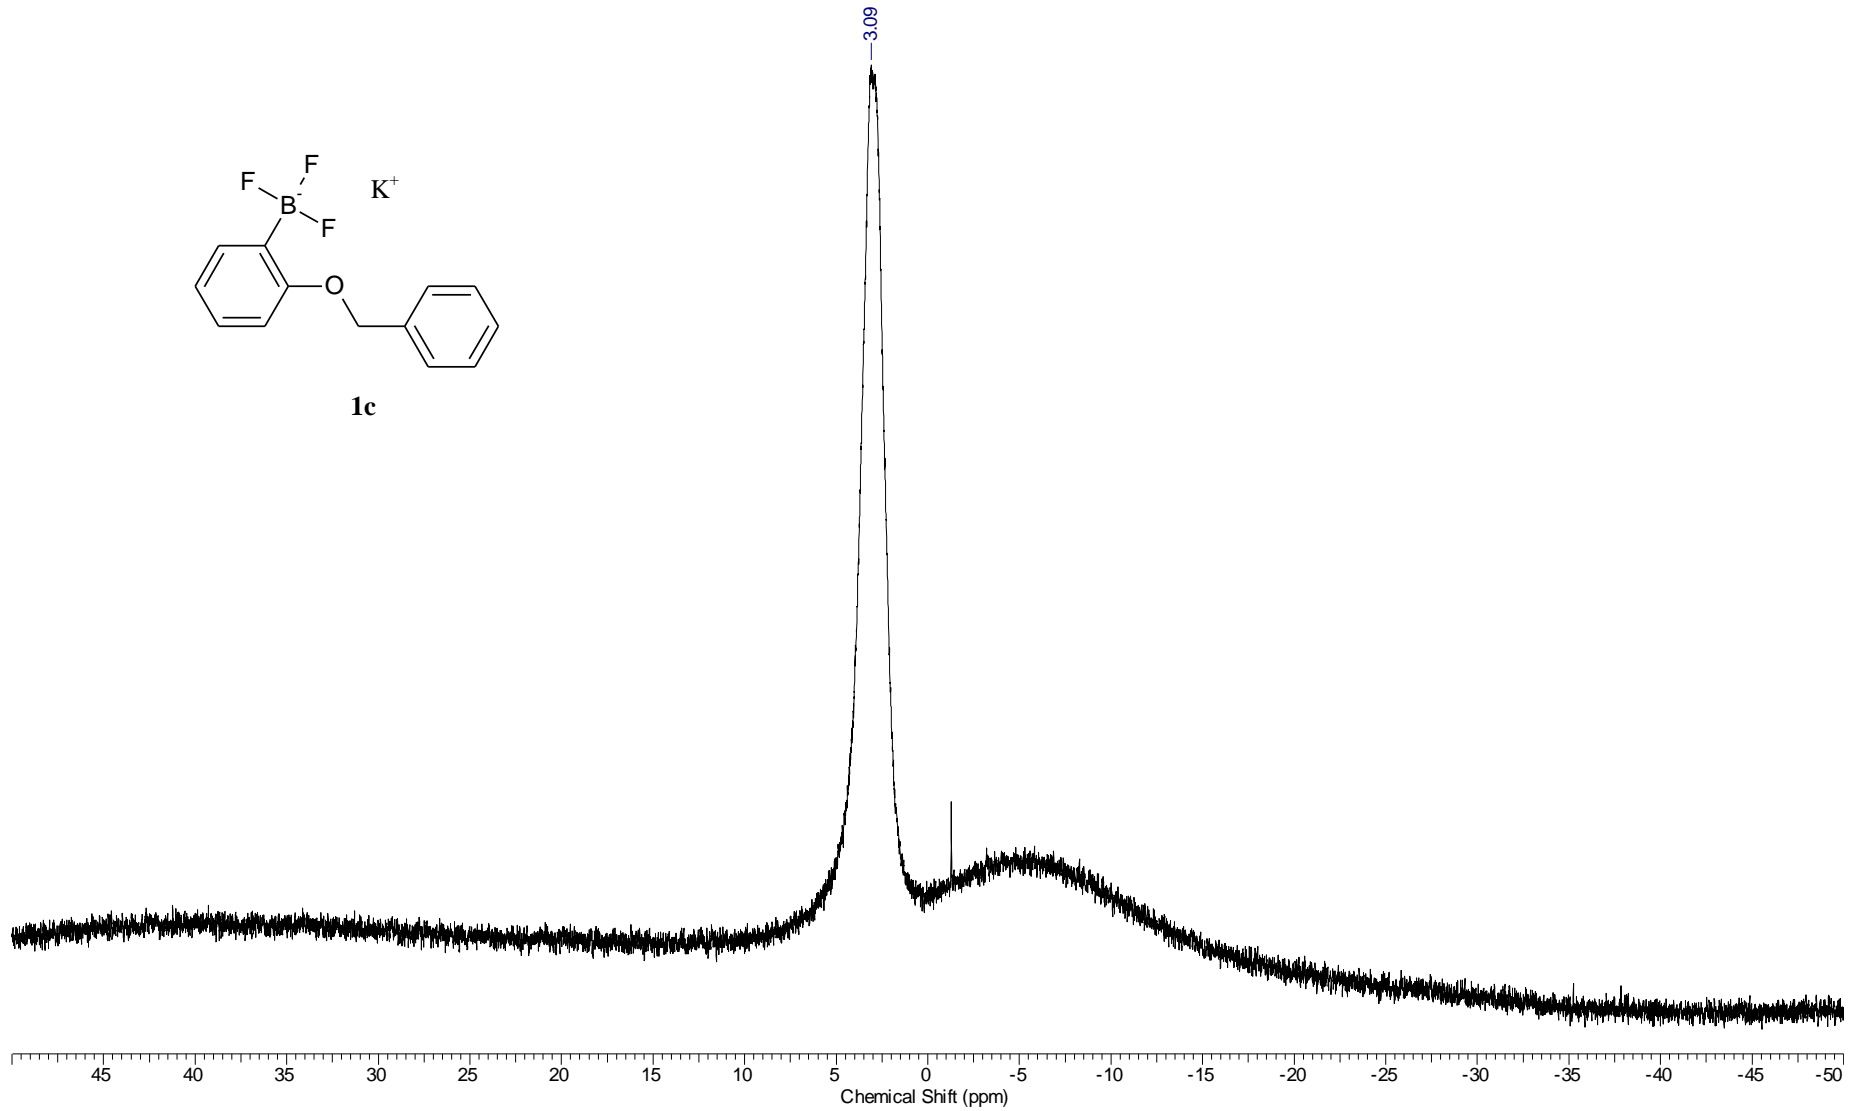

|                       |         |                      |                 |                      |          |                        |                     |
|-----------------------|---------|----------------------|-----------------|----------------------|----------|------------------------|---------------------|
| Frequency (MHz)       | 376.71  | Nucleus              | <sup>19</sup> F | Number of Transients | 64       | Origin                 | Bruker BioSpin GmbH |
| Original Points Count | 131072  | Owner                | tibbe_operator  | Points Count         | 131072   | SW(cyclical) (Hz)      | 93749.28            |
| Solvent               | DMSO-d6 | Spectrum Offset (Hz) | -37674.7617     | Sweep Width (Hz)     | 93748.56 | Temperature (degree C) | 27.000              |

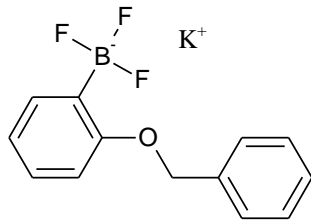

**1c**

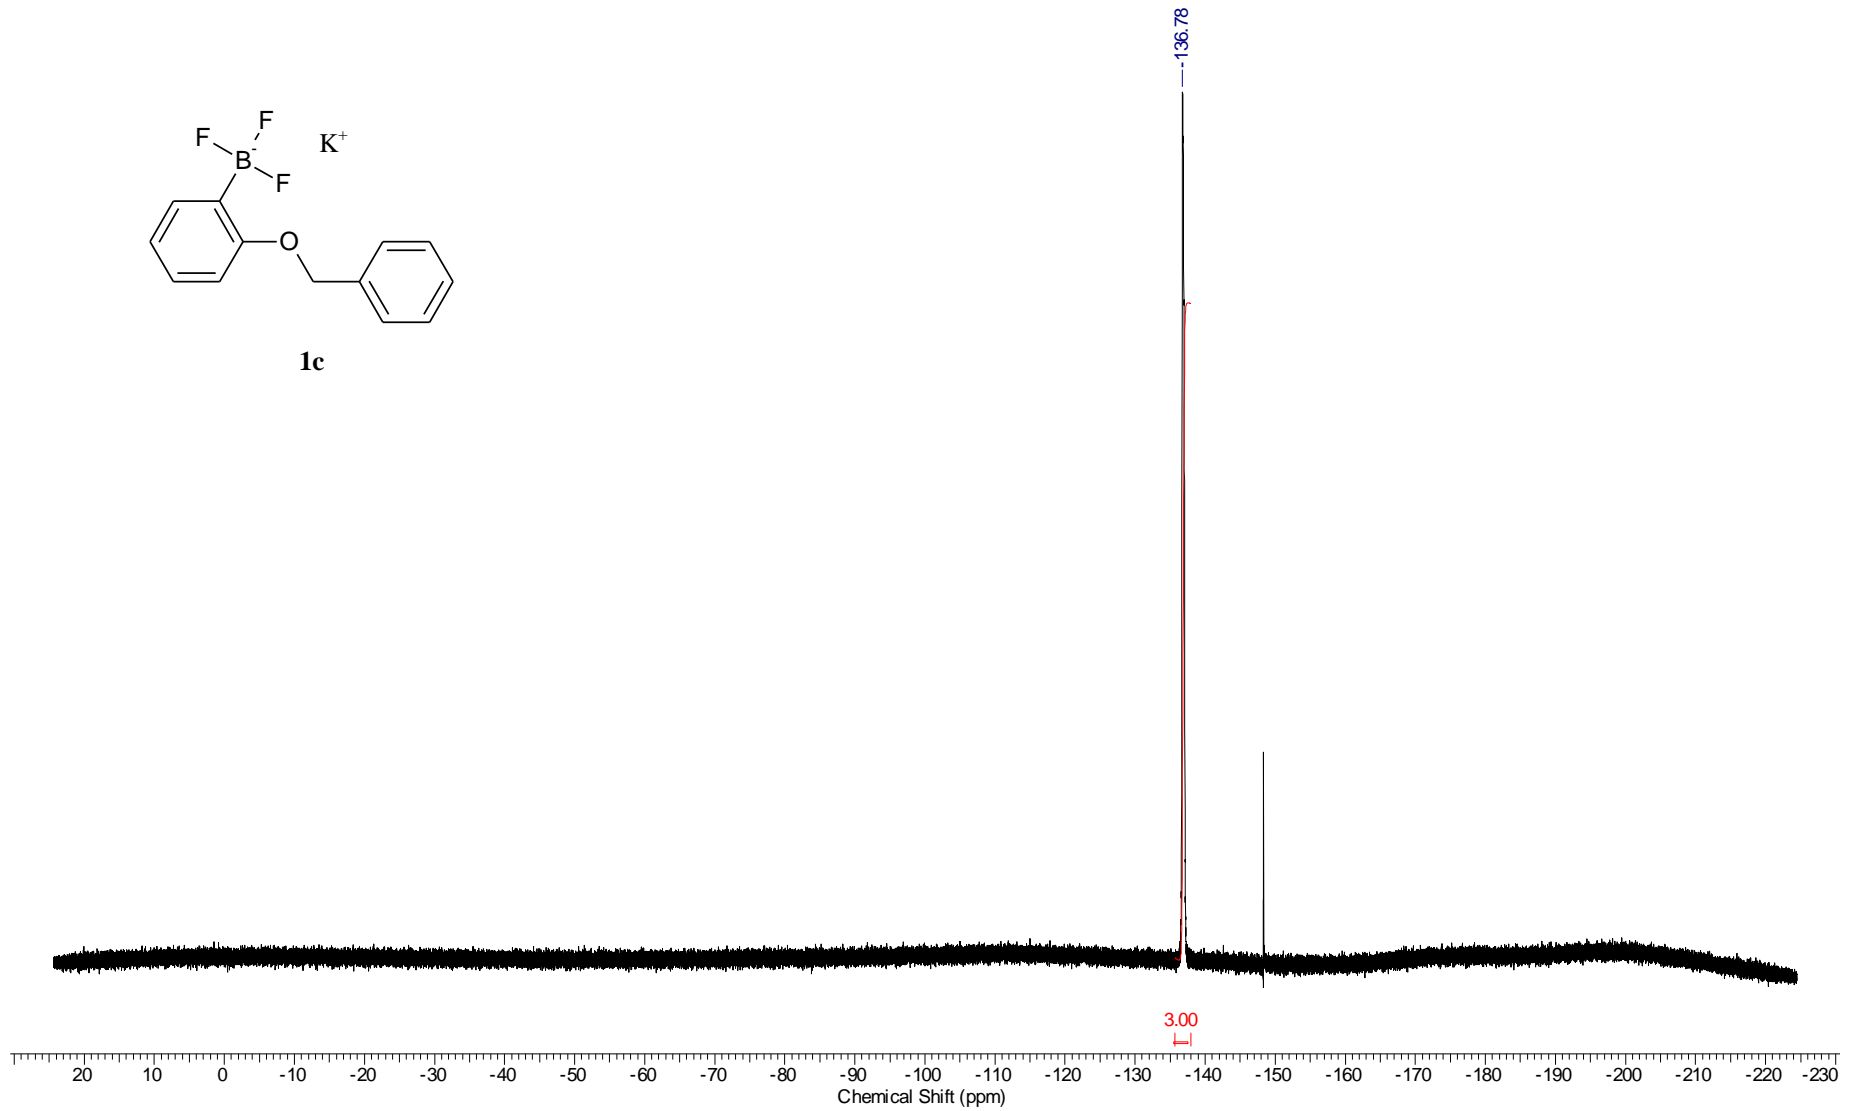

|                       |         |                      |                |                      |         |                        |                     |
|-----------------------|---------|----------------------|----------------|----------------------|---------|------------------------|---------------------|
| Frequency (MHz)       | 400.40  | Nucleus              | 1H             | Number of Transients | 16      | Origin                 | Bruker BioSpin GmbH |
| Original Points Count | 32768   | Owner                | tibbe_operator | Points Count         | 32768   | SW(cyclical) (Hz)      | 7211.32             |
| Solvent               | DMSO-d6 | Spectrum Offset (Hz) | 3398.1423      | Sweep Width (Hz)     | 7211.10 | Temperature (degree C) | 27.000              |

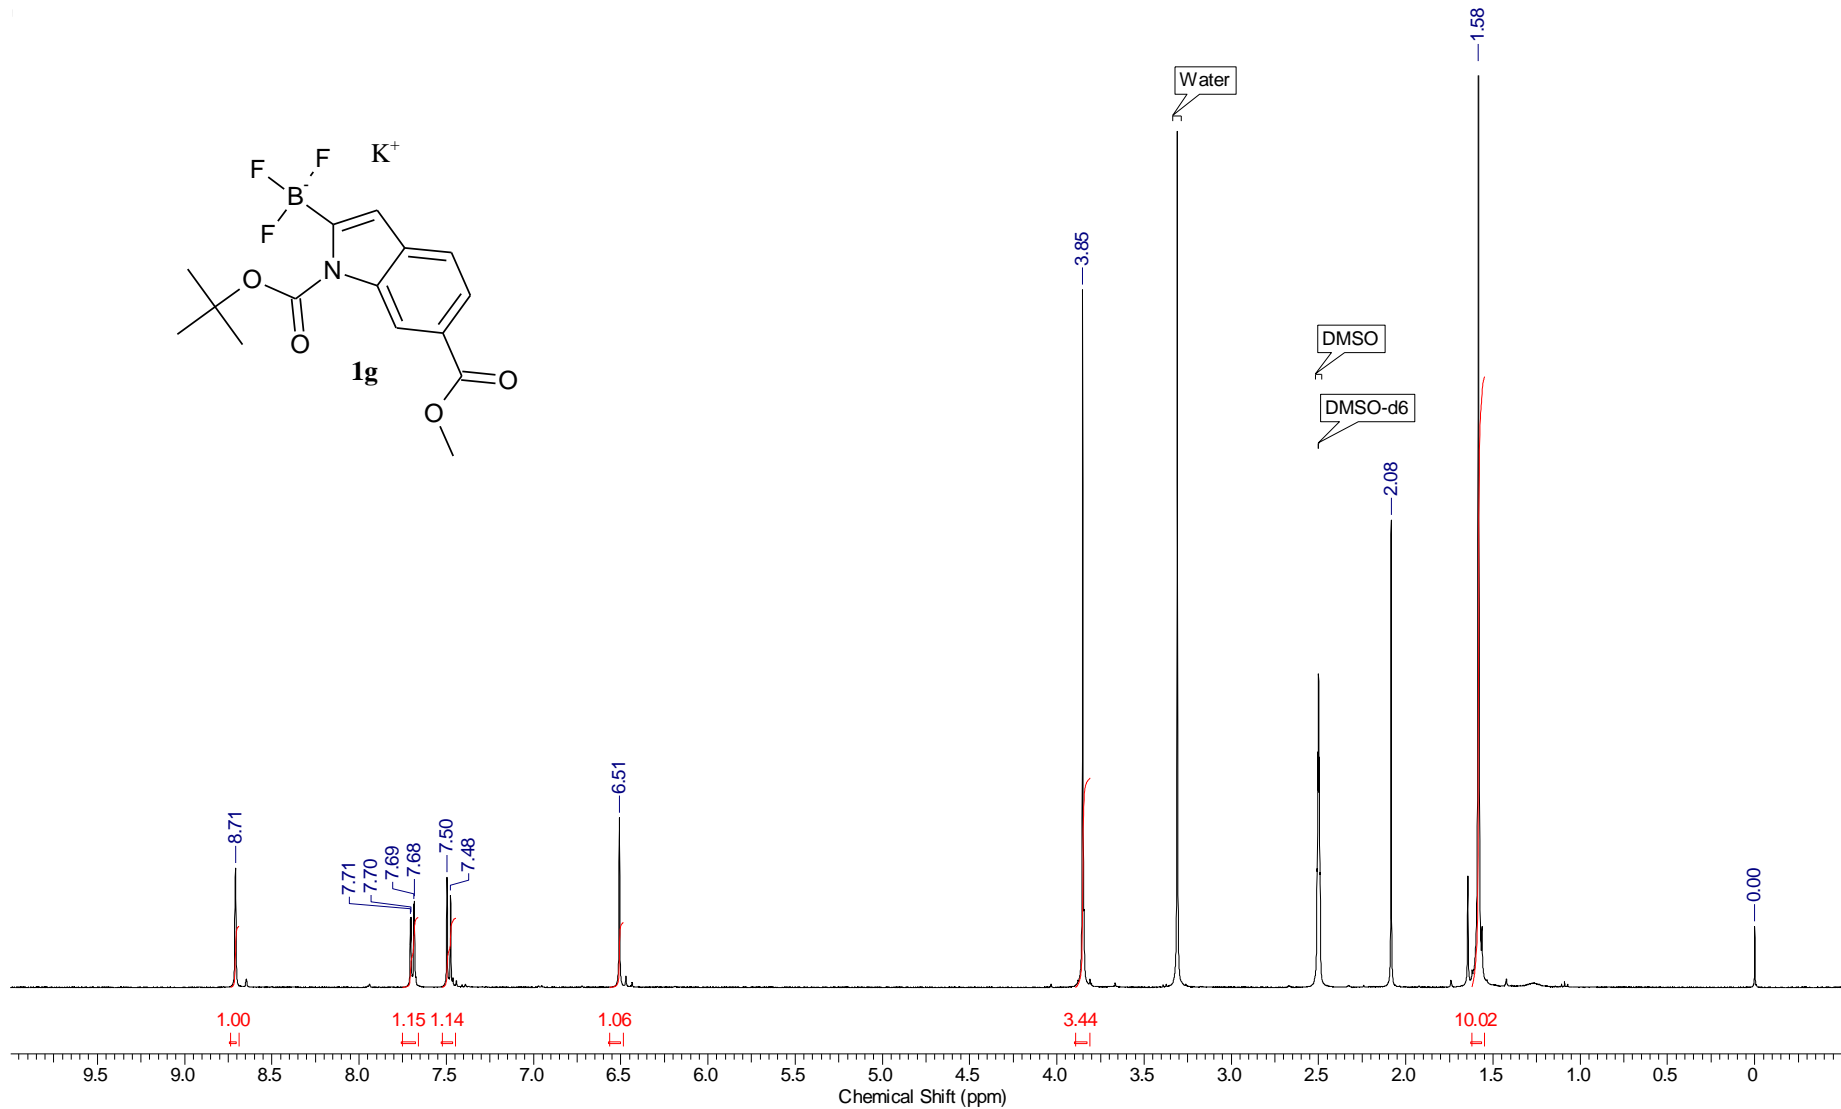

|                       |         |                      |                 |                      |          |                        |                     |
|-----------------------|---------|----------------------|-----------------|----------------------|----------|------------------------|---------------------|
| Frequency (MHz)       | 100.69  | Nucleus              | <sup>13</sup> C | Number of Transients | 1024     | Origin                 | Bruker BioSpin GmbH |
| Original Points Count | 32768   | Owner                | tibbe_operator  | Points Count         | 32768    | SW(cyclical) (Hz)      | 24037.73            |
| Solvent               | DMSO-d6 | Spectrum Offset (Hz) | 10016.6982      | Sweep Width (Hz)     | 24036.99 | Temperature (degree C) | 27.000              |

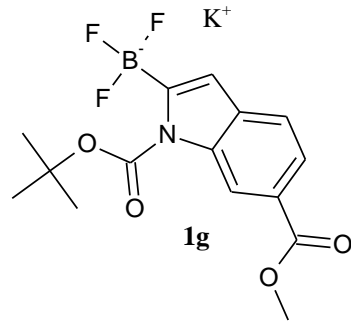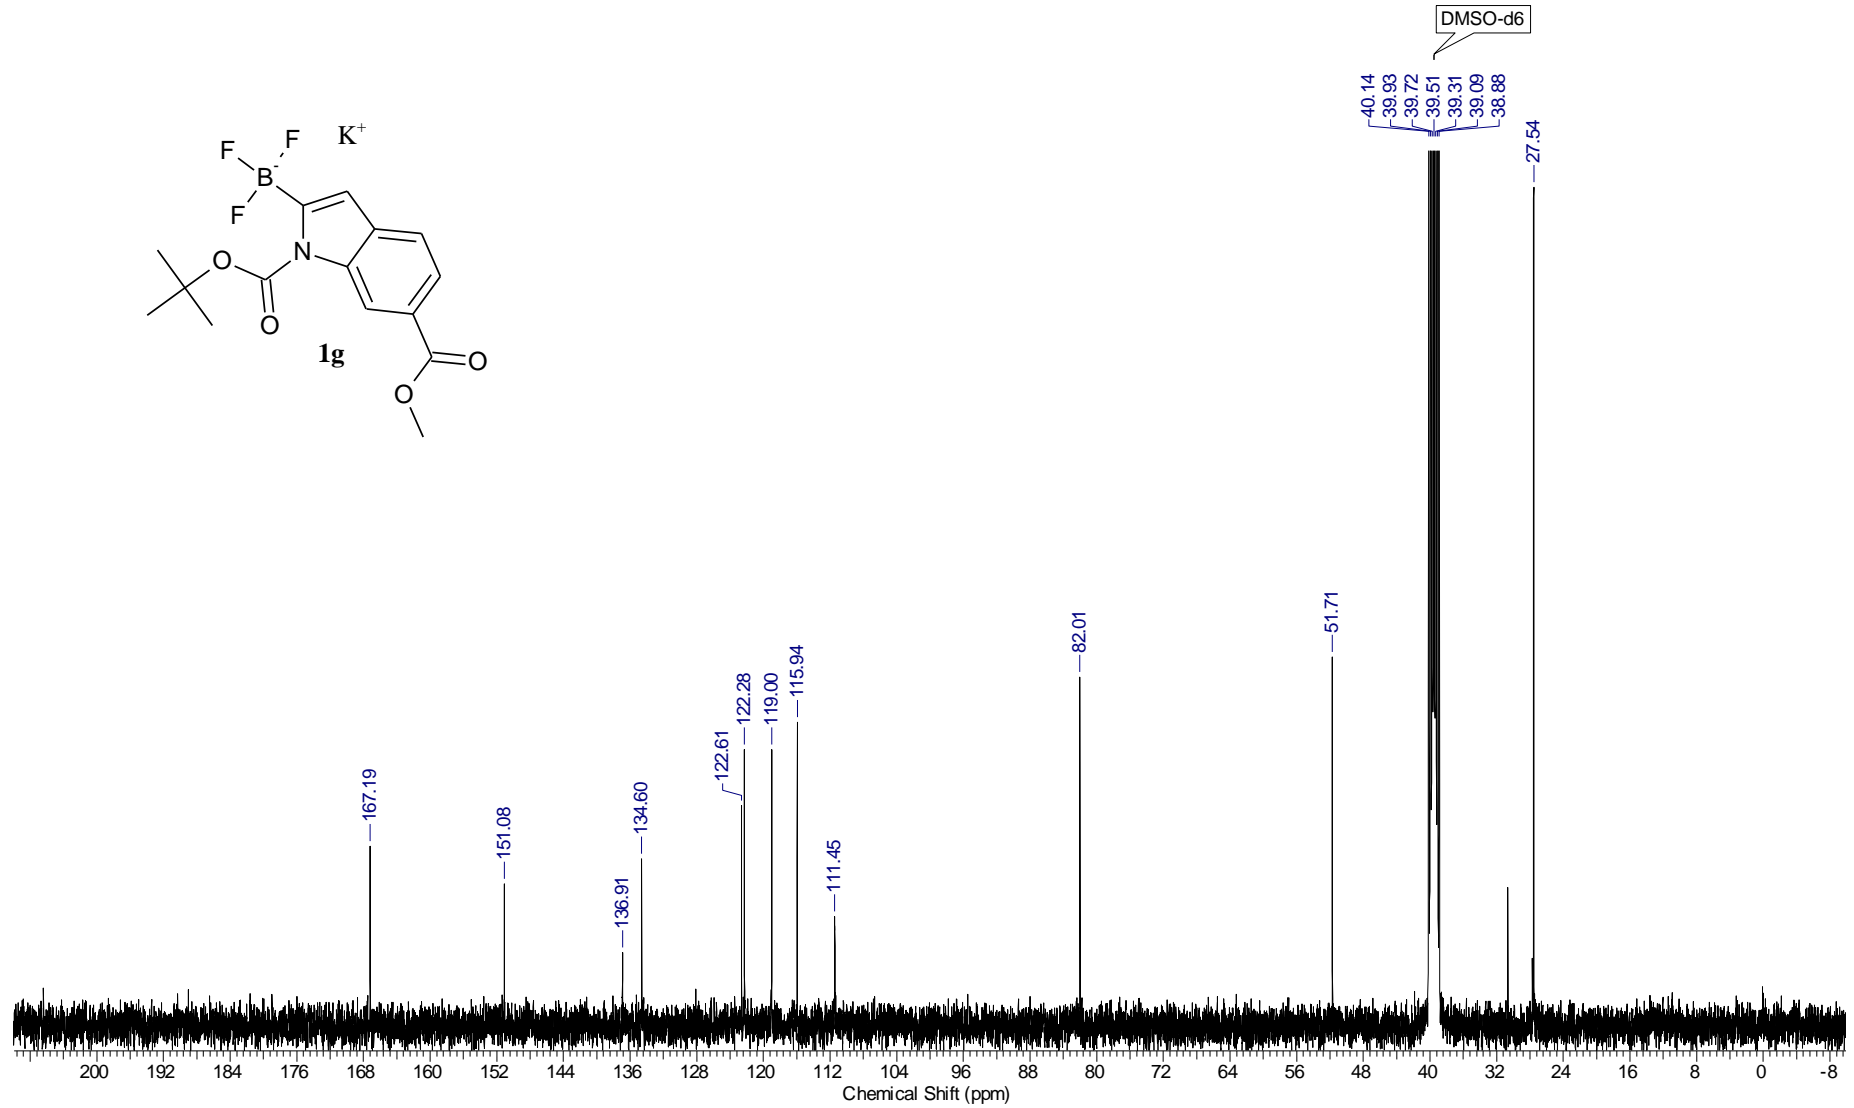

|                       |         |                      |                |                      |          |                        |                     |
|-----------------------|---------|----------------------|----------------|----------------------|----------|------------------------|---------------------|
| Frequency (MHz)       | 128.46  | Nucleus              | 11B            | Number of Transients | 128      | Origin                 | Bruker BioSpin GmbH |
| Original Points Count | 32768   | Owner                | tibbe_operator | Points Count         | 32768    | SW(cyclical) (Hz)      | 25509.43            |
| Solvent               | DMSO-d6 | Spectrum Offset (Hz) | 1.2842         | Sweep Width (Hz)     | 25508.65 | Temperature (degree C) | 27.000              |

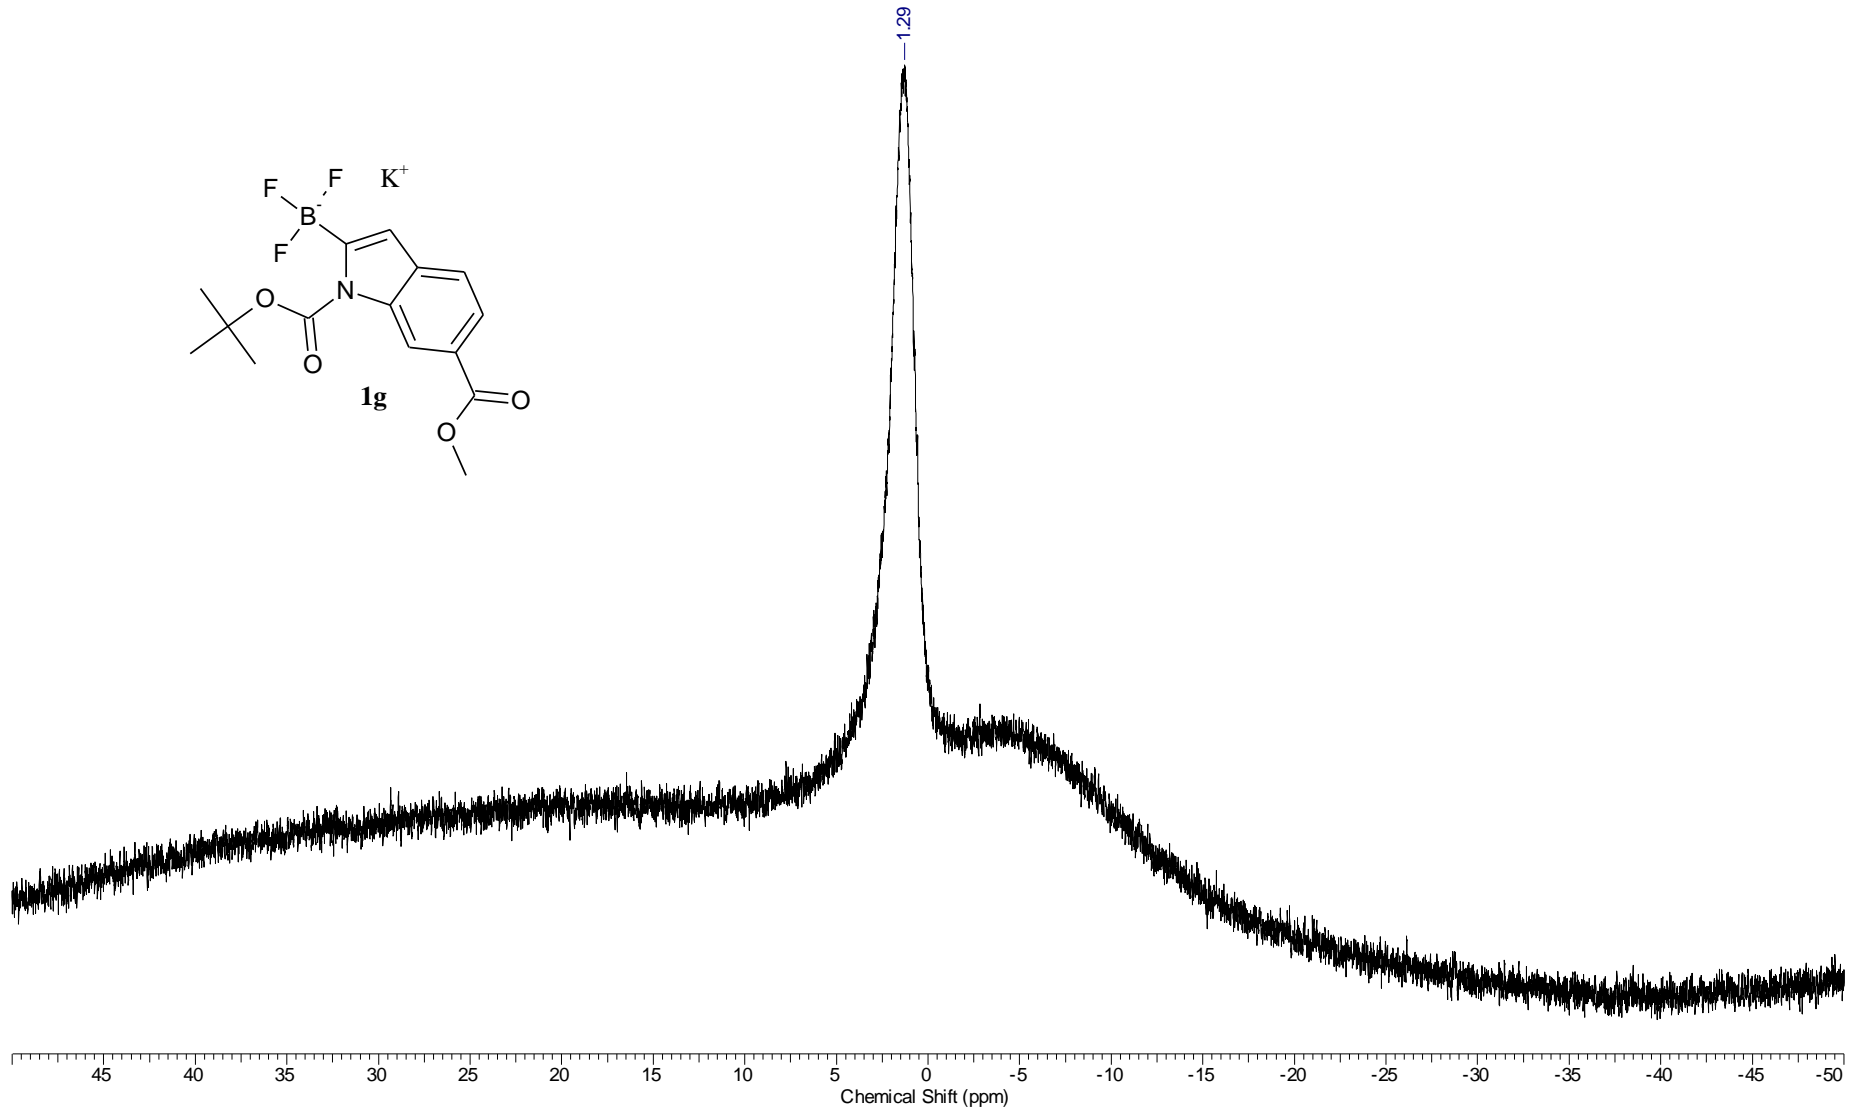

|                       |         |                      |                 |                      |          |                        |                     |
|-----------------------|---------|----------------------|-----------------|----------------------|----------|------------------------|---------------------|
| Frequency (MHz)       | 376.71  | Nucleus              | <sup>19</sup> F | Number of Transients | 64       | Origin                 | Bruker BioSpin GmbH |
| Original Points Count | 131072  | Owner                | tibbe_operator  | Points Count         | 131072   | SW(cyclical) (Hz)      | 93749.28            |
| Solvent               | DMSO-d6 | Spectrum Offset (Hz) | -37674.7617     | Sweep Width (Hz)     | 93748.56 | Temperature (degree C) | 27.000              |

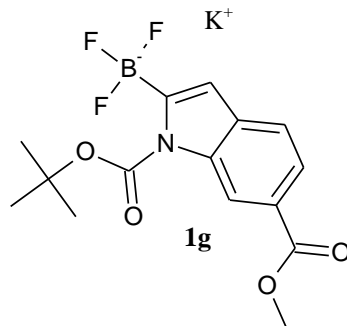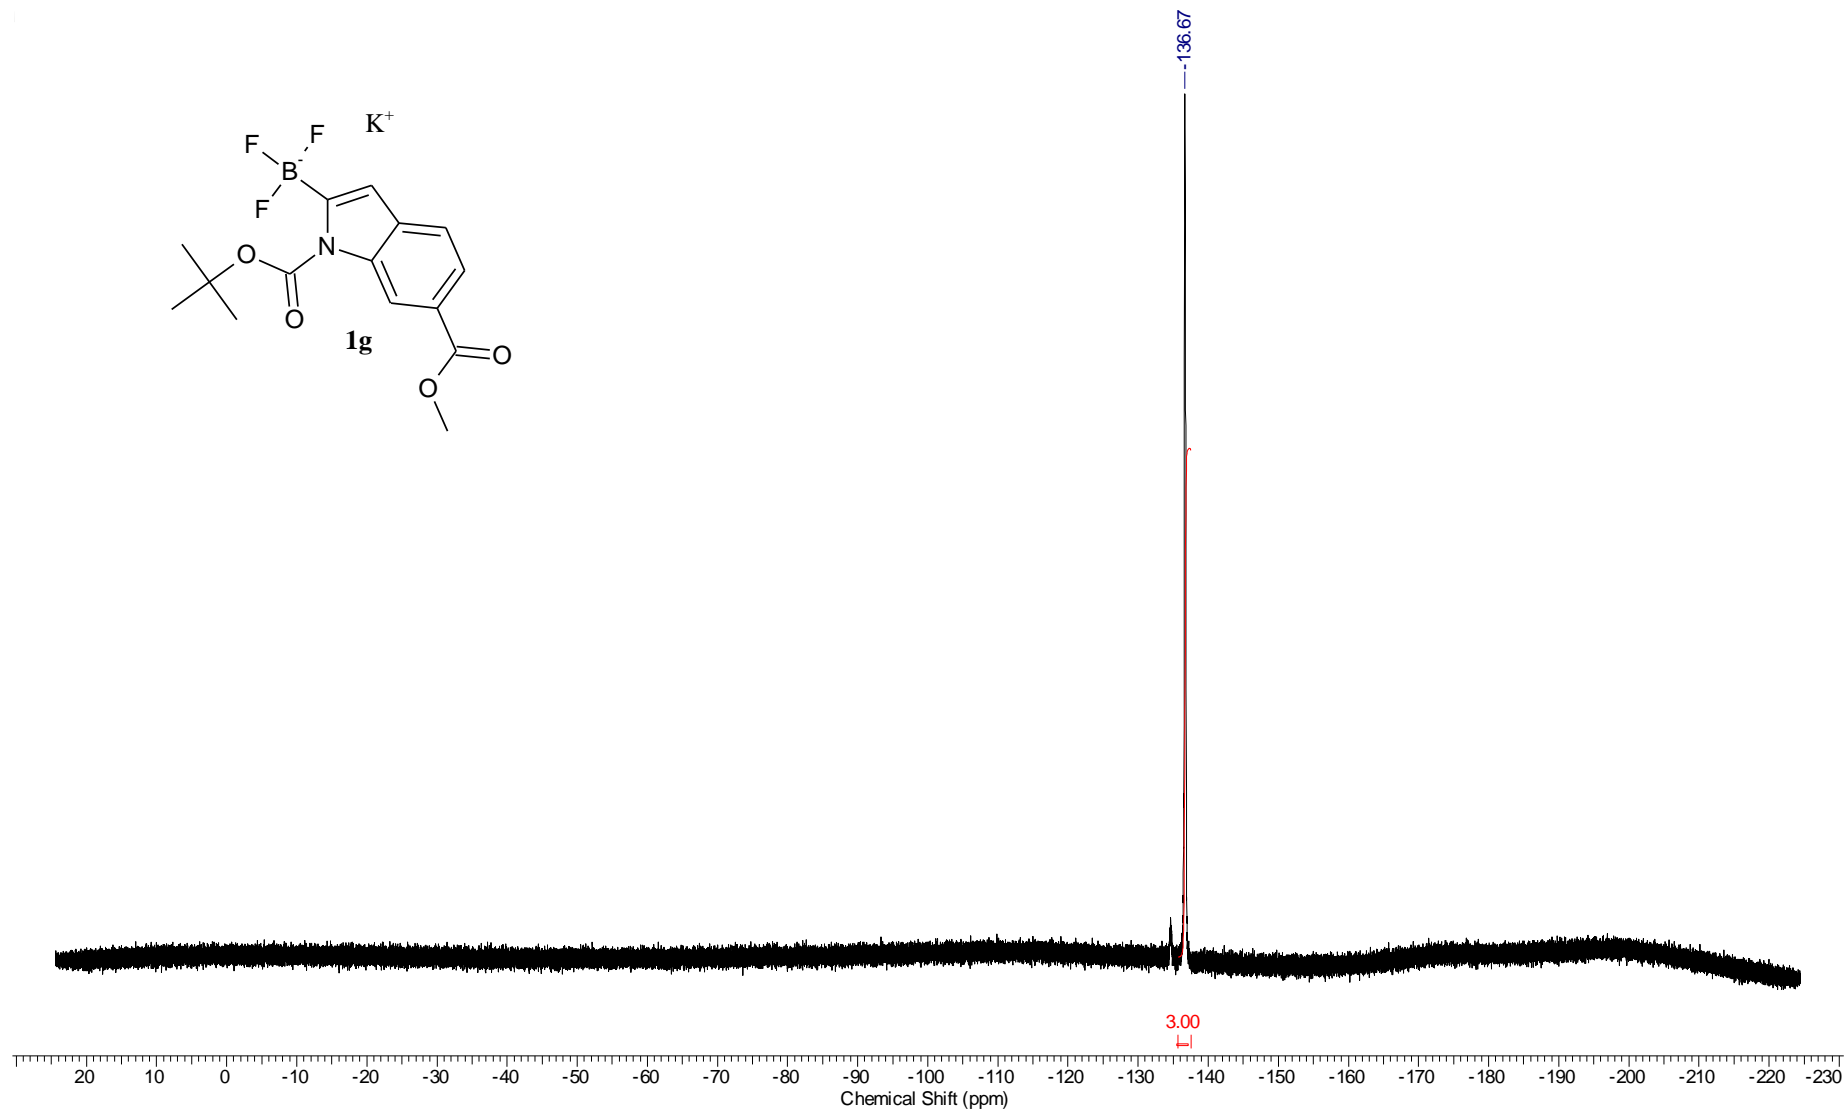

|                       |         |                      |                |                      |         |                        |                     |
|-----------------------|---------|----------------------|----------------|----------------------|---------|------------------------|---------------------|
| Frequency (MHz)       | 400.40  | Nucleus              | 1H             | Number of Transients | 16      | Origin                 | Bruker BioSpin GmbH |
| Original Points Count | 32768   | Owner                | tibbe_operator | Points Count         | 32768   | SW(cyclical) (Hz)      | 7211.32             |
| Solvent               | DMSO-d6 | Spectrum Offset (Hz) | 3398.5825      | Sweep Width (Hz)     | 7211.10 | Temperature (degree C) | 27.000              |

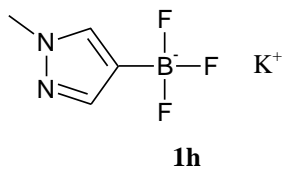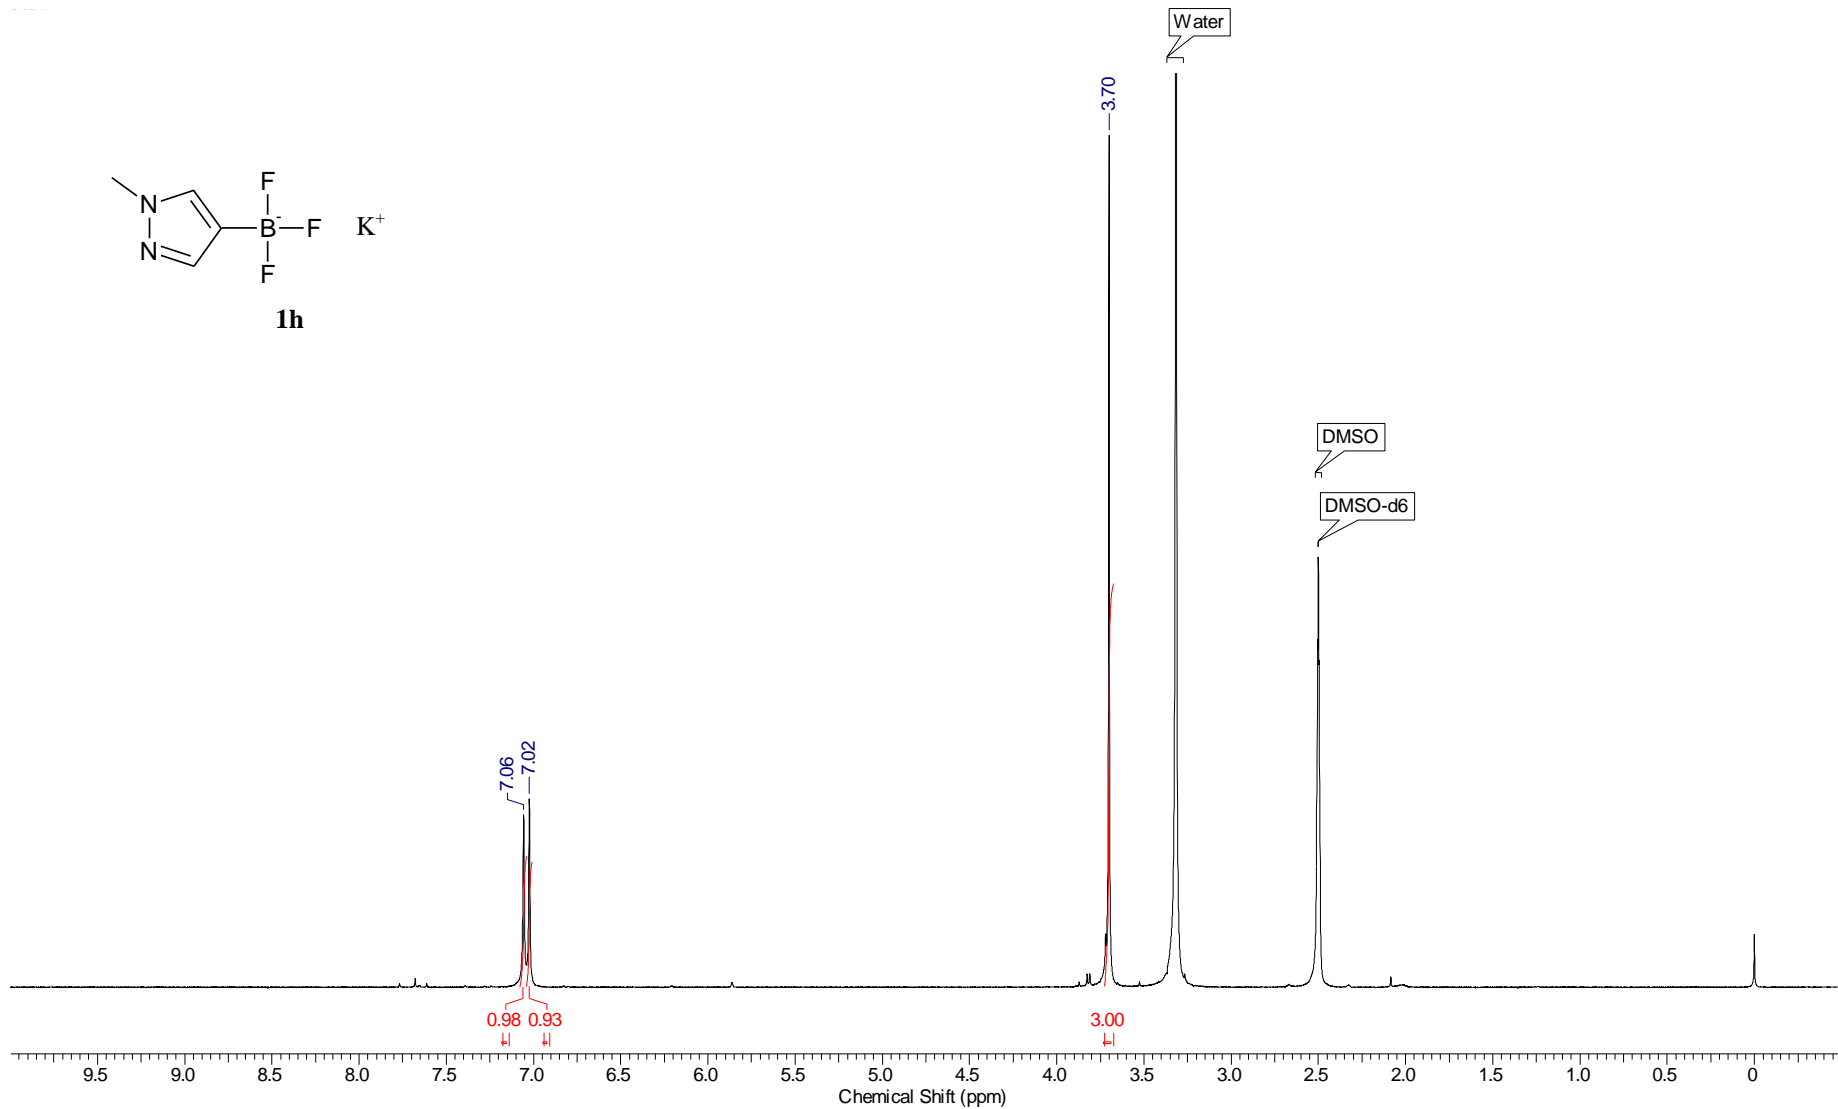



|                       |         |                      |                 |                      |          |                        |                     |
|-----------------------|---------|----------------------|-----------------|----------------------|----------|------------------------|---------------------|
| Frequency (MHz)       | 100.69  | Nucleus              | <sup>13</sup> C | Number of Transients | 1024     | Origin                 | Bruker BioSpin GmbH |
| Original Points Count | 32768   | Owner                | tibbe_operator  | Points Count         | 32768    | SW(cyclical) (Hz)      | 24037.73            |
| Solvent               | DMSO-d6 | Spectrum Offset (Hz) | 10017.4326      | Sweep Width (Hz)     | 24036.99 | Temperature (degree C) | 27.000              |

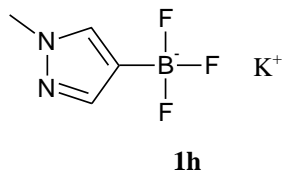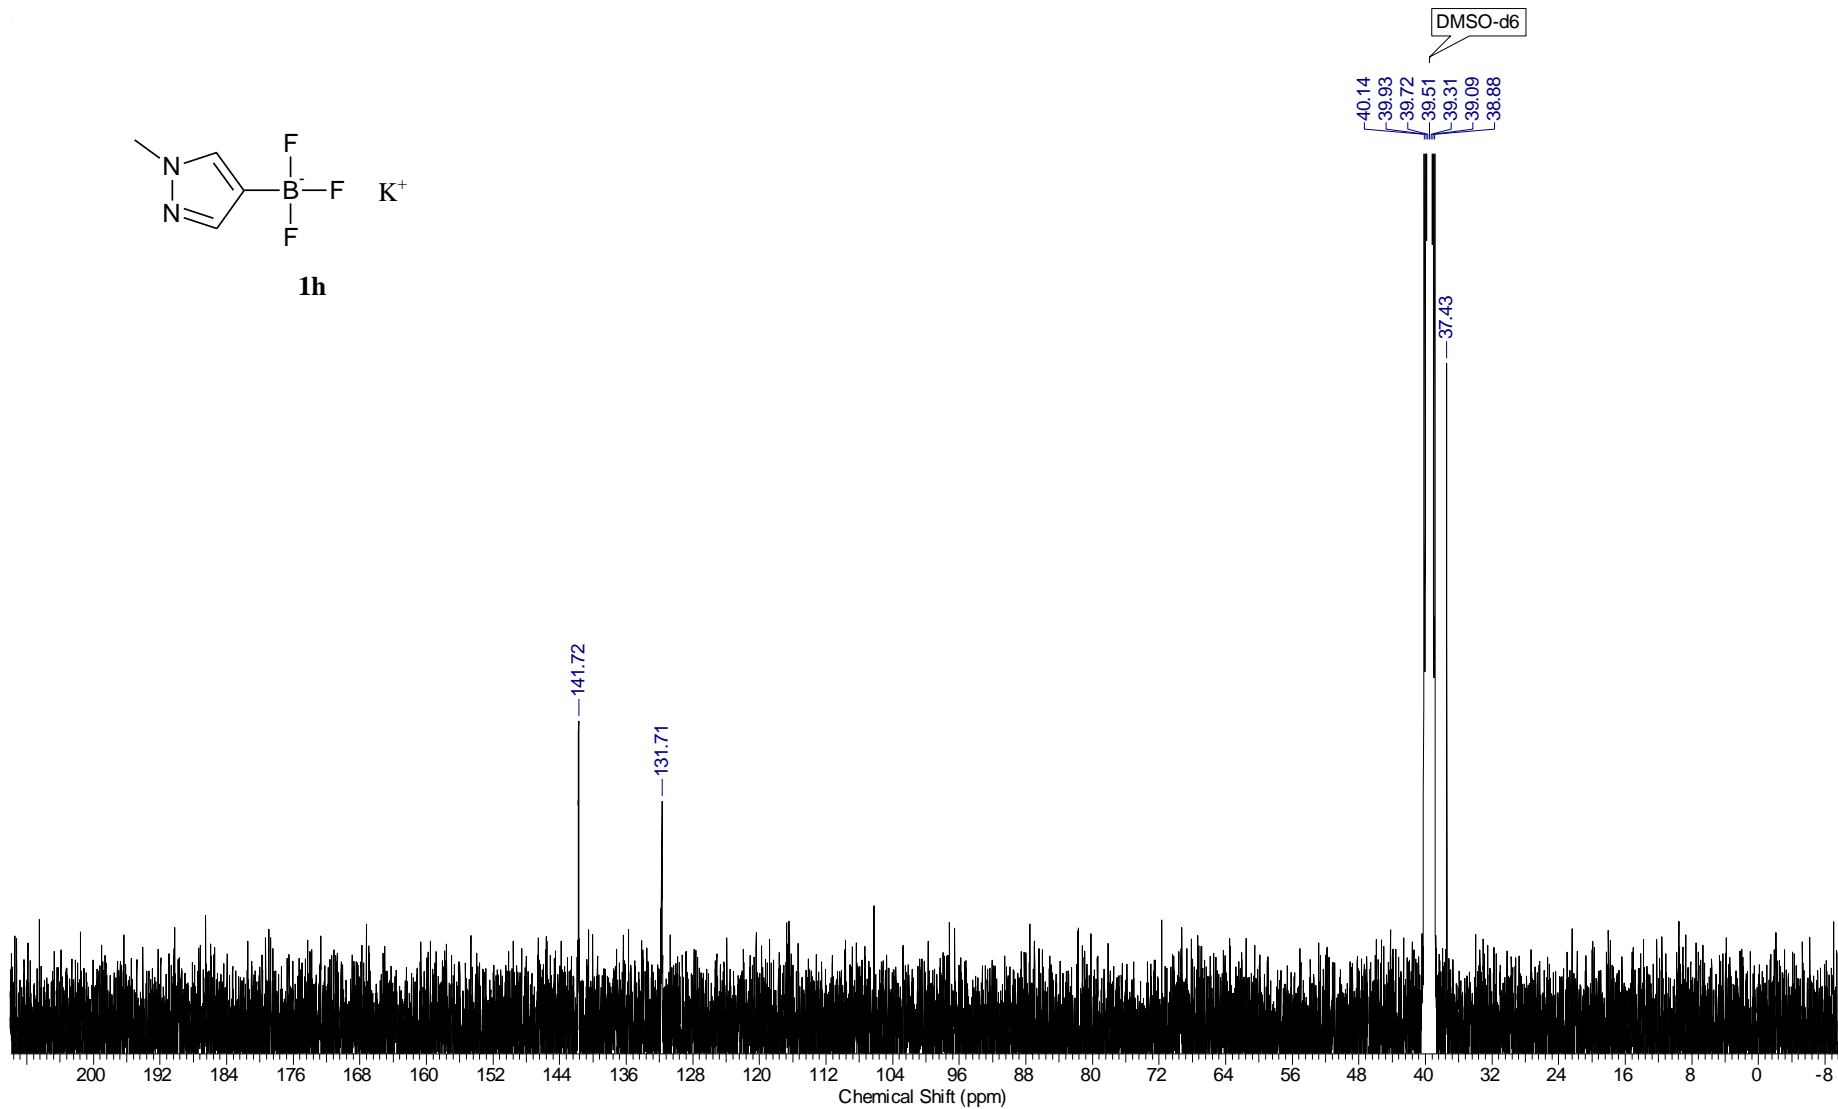

|                       |         |                      |                |                      |          |                        |                     |
|-----------------------|---------|----------------------|----------------|----------------------|----------|------------------------|---------------------|
| Frequency (MHz)       | 128.46  | Nucleus              | 11B            | Number of Transients | 128      | Origin                 | Bruker BioSpin GmbH |
| Original Points Count | 32768   | Owner                | tibbe_operator | Points Count         | 32768    | SW(cyclical) (Hz)      | 25509.43            |
| Solvent               | DMSO-d6 | Spectrum Offset (Hz) | 1.2842         | Sweep Width (Hz)     | 25508.65 | Temperature (degree C) | 27.000              |

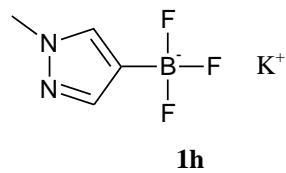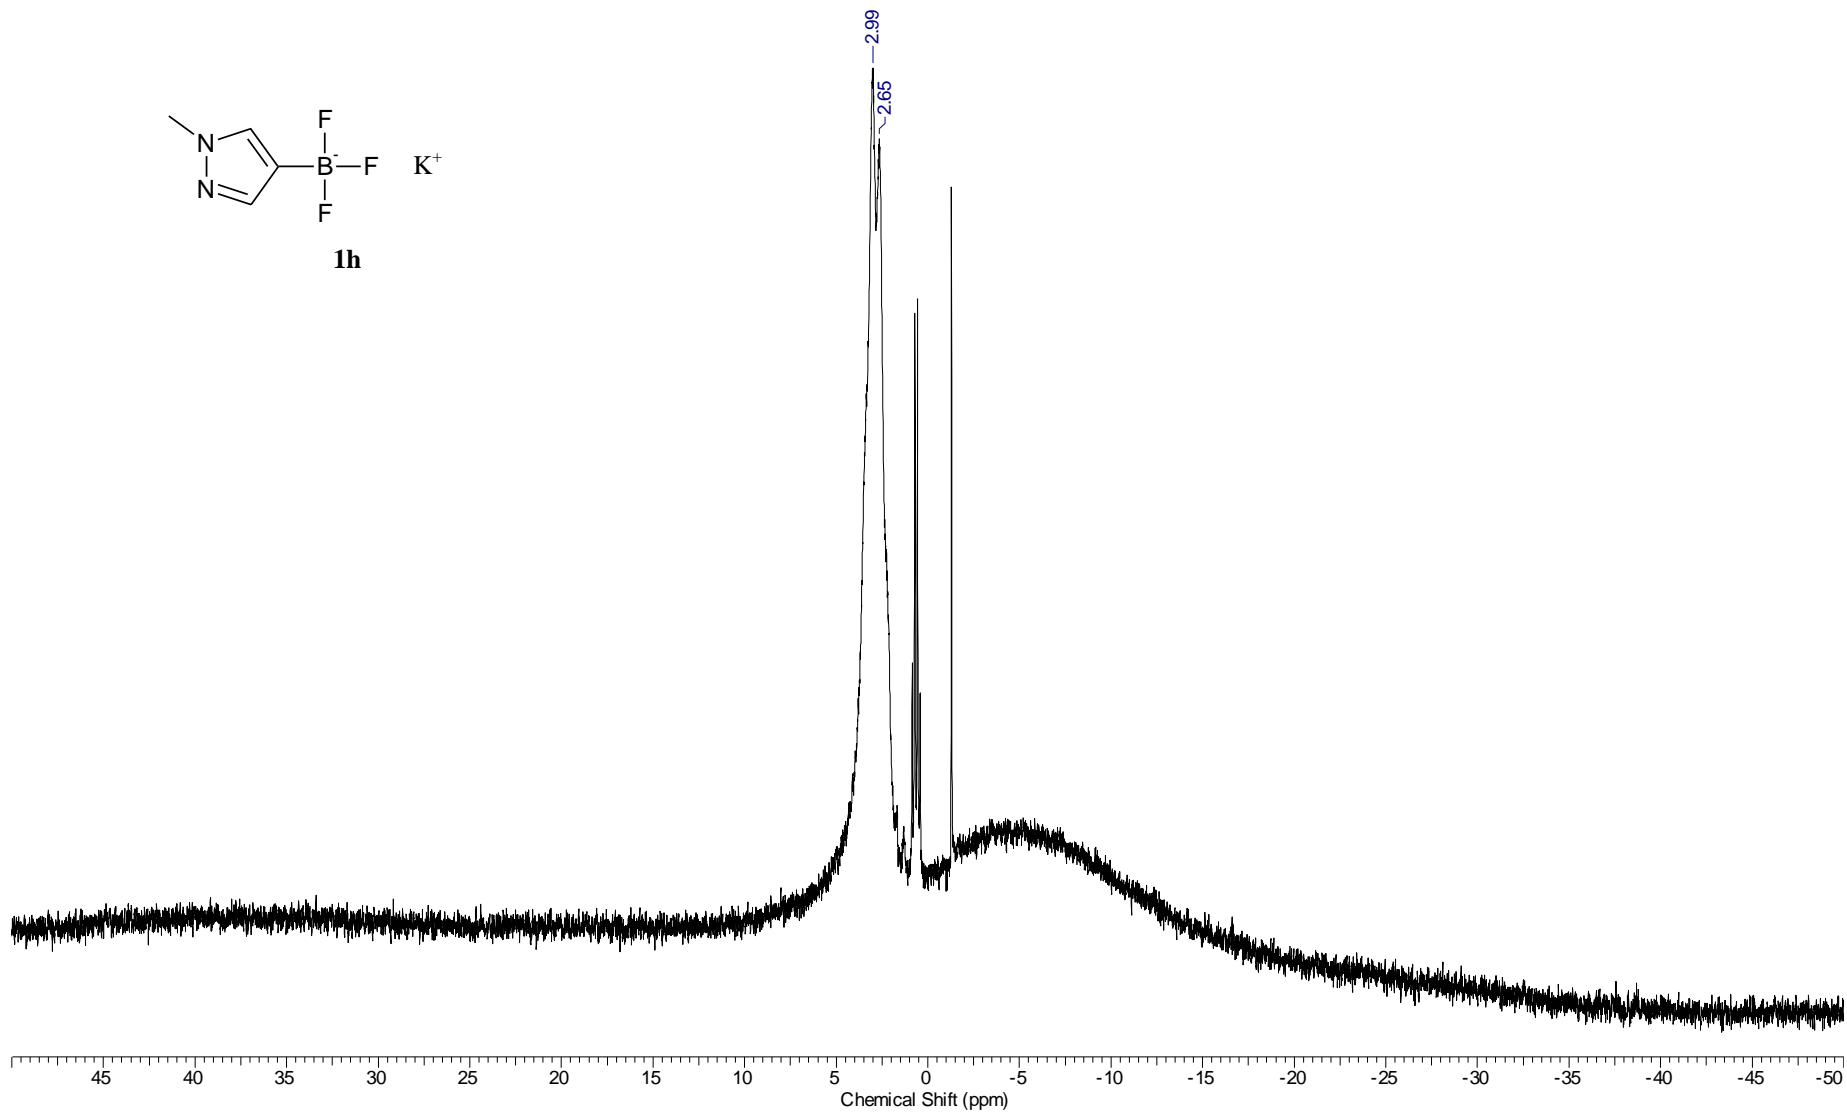

|                       |         |                      |                 |                      |          |                        |                     |
|-----------------------|---------|----------------------|-----------------|----------------------|----------|------------------------|---------------------|
| Frequency (MHz)       | 376.71  | Nucleus              | <sup>19</sup> F | Number of Transients | 64       | Origin                 | Bruker BioSpin GmbH |
| Original Points Count | 131072  | Owner                | tibbe_operator  | Points Count         | 131072   | SW(cyclical) (Hz)      | 93749.28            |
| Solvent               | DMSO-d6 | Spectrum Offset (Hz) | -37674.7617     | Sweep Width (Hz)     | 93748.56 | Temperature (degree C) | 27.000              |

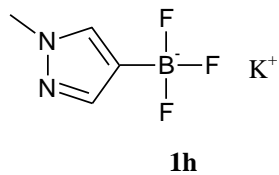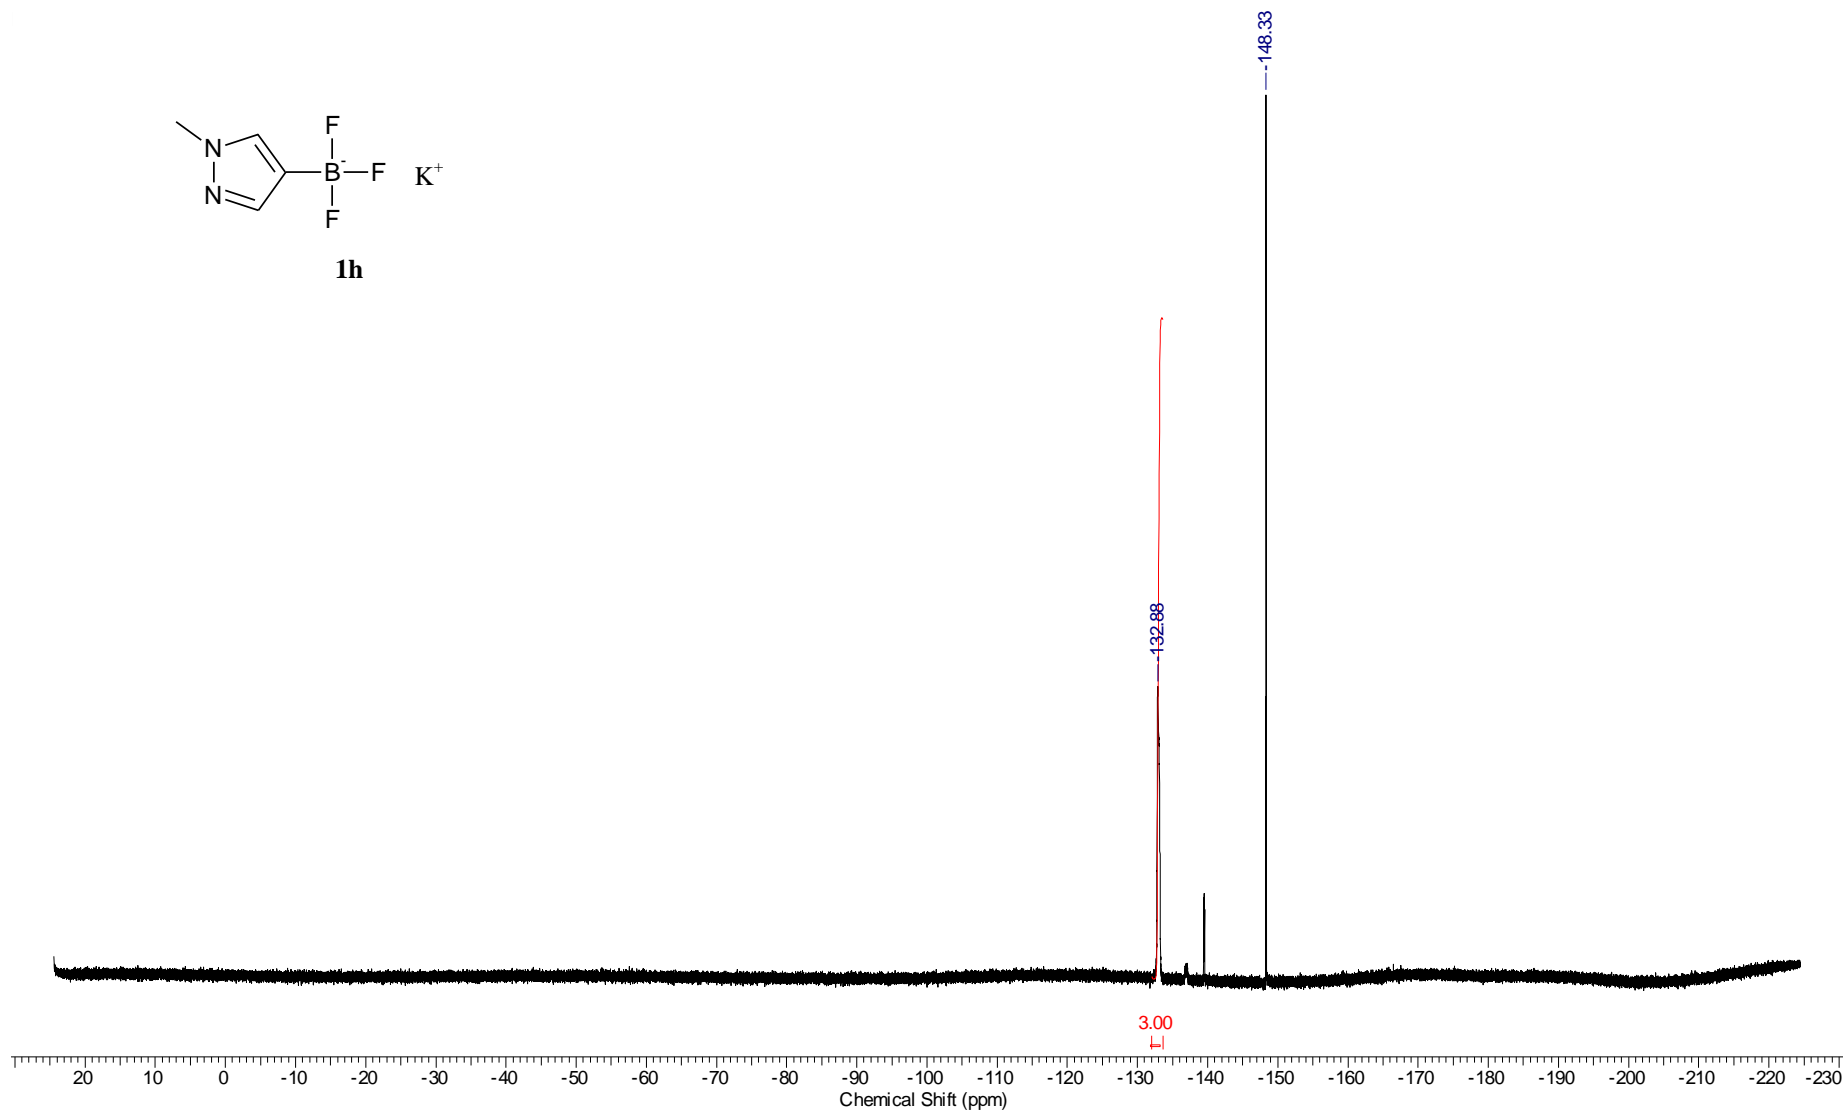

|                       |         |                      |                |                      |         |                        |                     |
|-----------------------|---------|----------------------|----------------|----------------------|---------|------------------------|---------------------|
| Frequency (MHz)       | 400.40  | Nucleus              | 1H             | Number of Transients | 16      | Origin                 | Bruker BioSpin GmbH |
| Original Points Count | 32768   | Owner                | tibbe_operator | Points Count         | 32768   | SW(cyclical) (Hz)      | 7211.32             |
| Solvent               | DMSO-d6 | Spectrum Offset (Hz) | 3398.1423      | Sweep Width (Hz)     | 7211.10 | Temperature (degree C) | 27.000              |

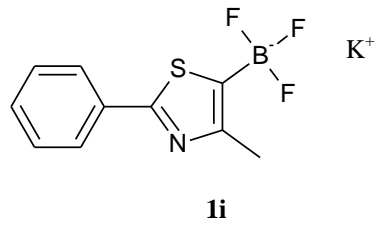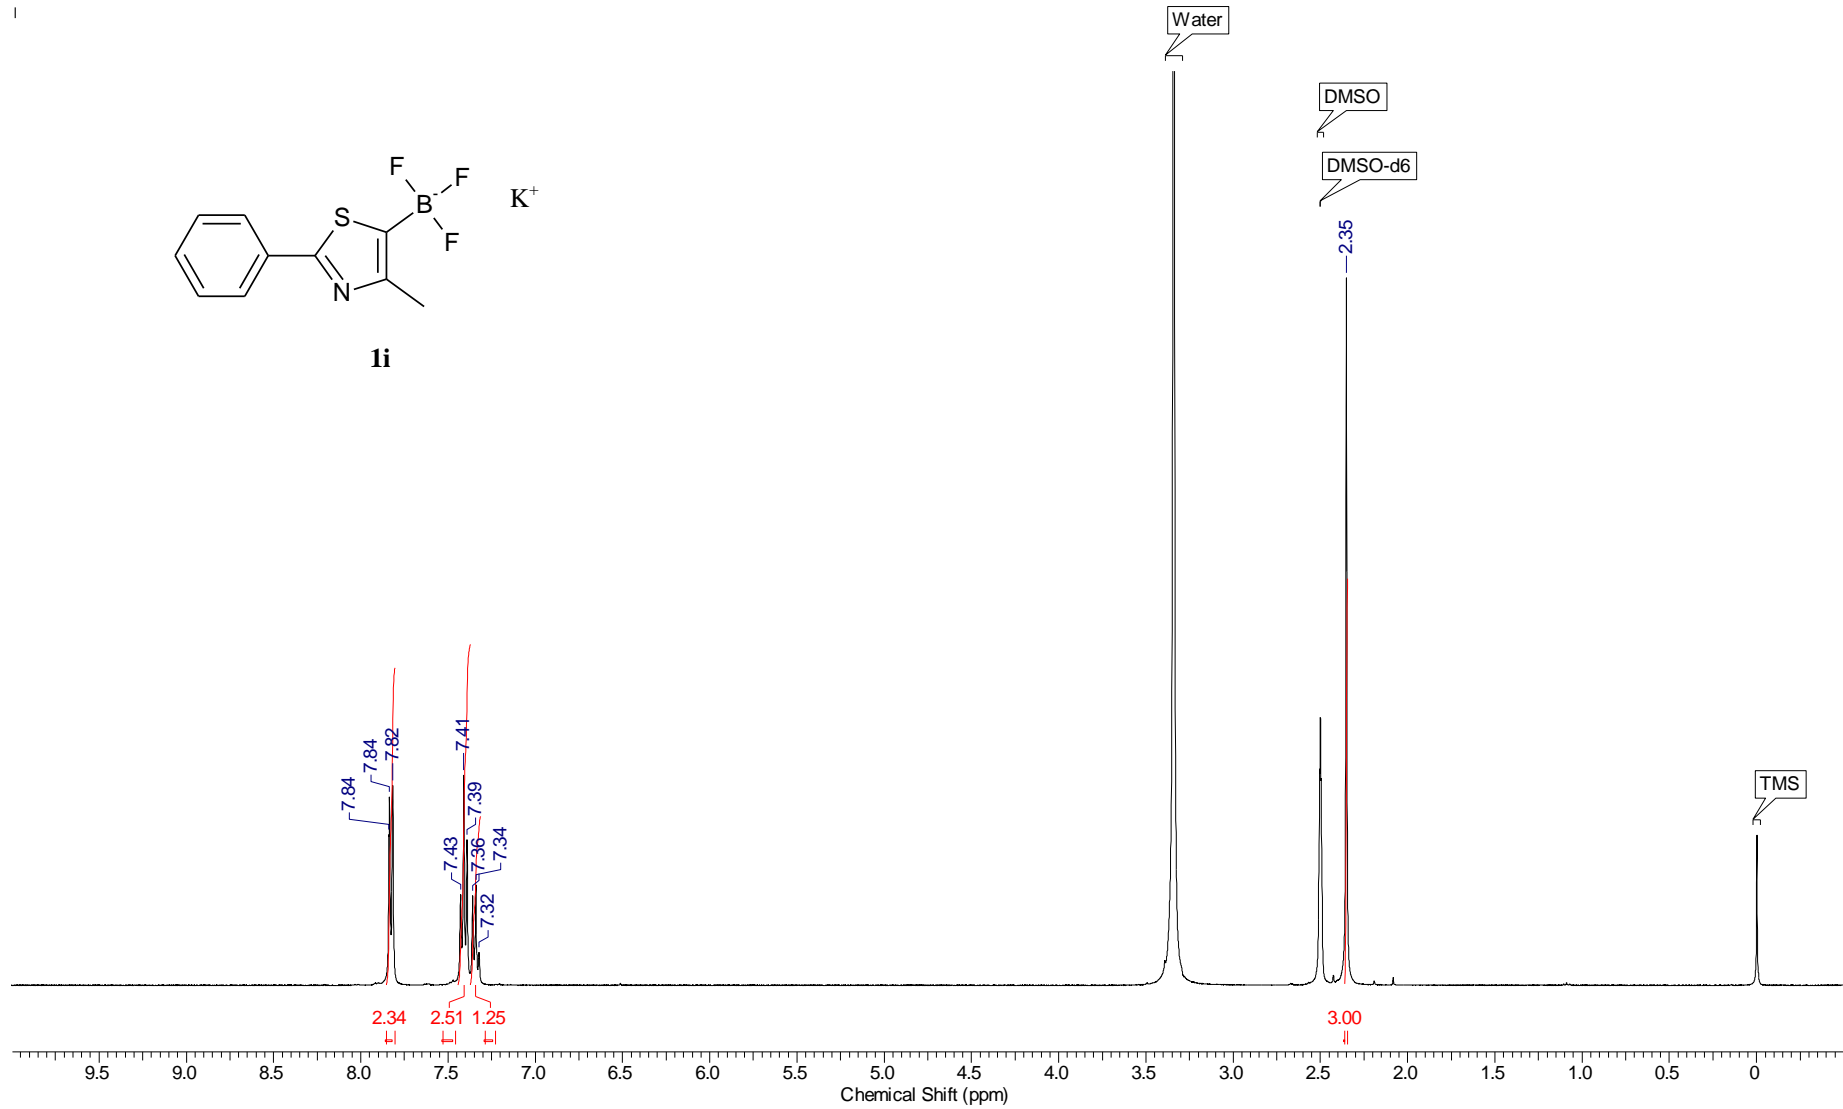

|                       |         |                      |                 |                      |          |                        |                     |
|-----------------------|---------|----------------------|-----------------|----------------------|----------|------------------------|---------------------|
| Frequency (MHz)       | 100.69  | Nucleus              | <sup>13</sup> C | Number of Transients | 1024     | Origin                 | Bruker BioSpin GmbH |
| Original Points Count | 32768   | Owner                | tibbe_operator  | Points Count         | 32768    | SW(cyclical) (Hz)      | 24037.73            |
| Solvent               | DMSO-d6 | Spectrum Offset (Hz) | 10019.6328      | Sweep Width (Hz)     | 24036.99 | Temperature (degree C) | 27.000              |

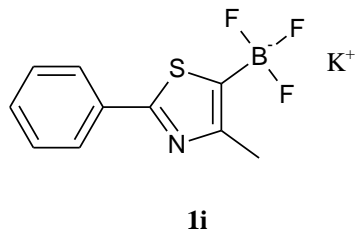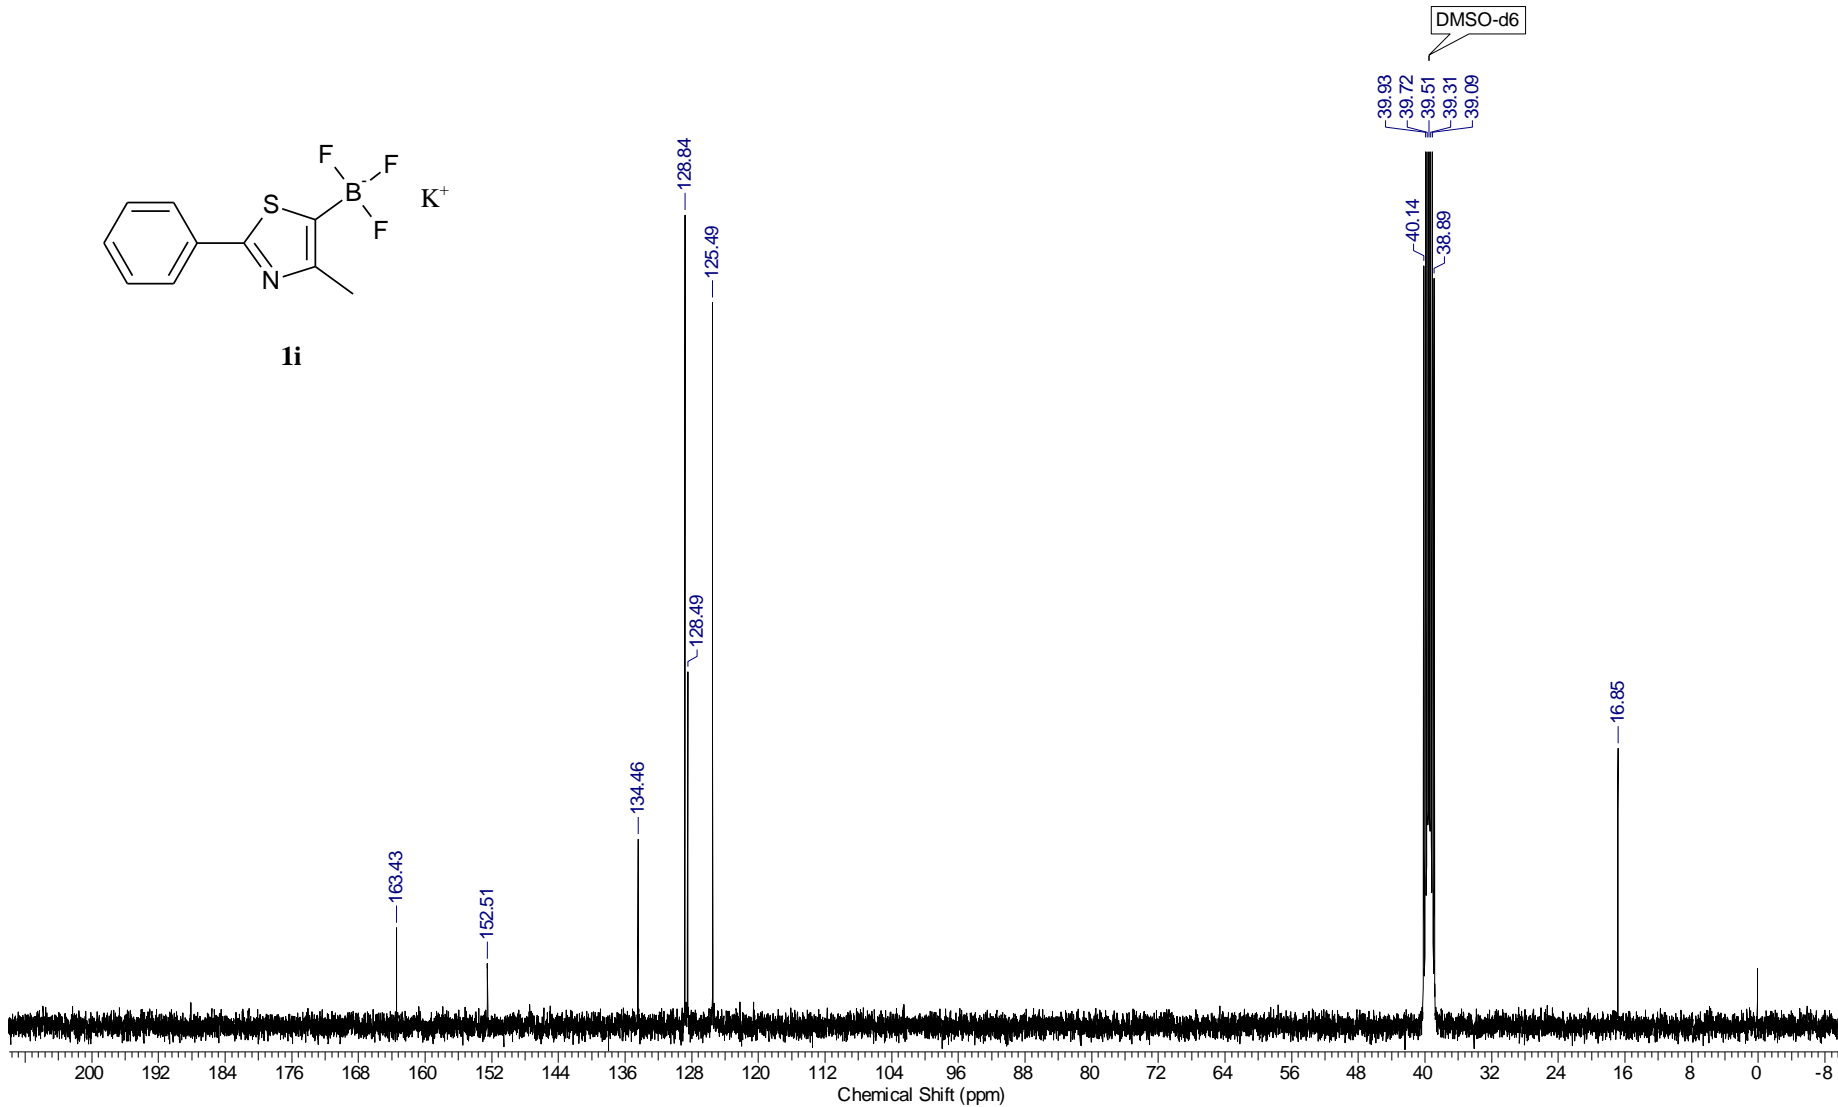

|                       |         |                      |                |                      |          |                        |                     |
|-----------------------|---------|----------------------|----------------|----------------------|----------|------------------------|---------------------|
| Frequency (MHz)       | 128.46  | Nucleus              | 11B            | Number of Transients | 128      | Origin                 | Bruker BioSpin GmbH |
| Original Points Count | 32768   | Owner                | tibbe_operator | Points Count         | 32768    | SW(cyclical) (Hz)      | 25509.43            |
| Solvent               | DMSO-d6 | Spectrum Offset (Hz) | 1.2842         | Sweep Width (Hz)     | 25508.65 | Temperature (degree C) | 27.000              |

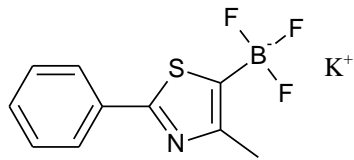

**1i**

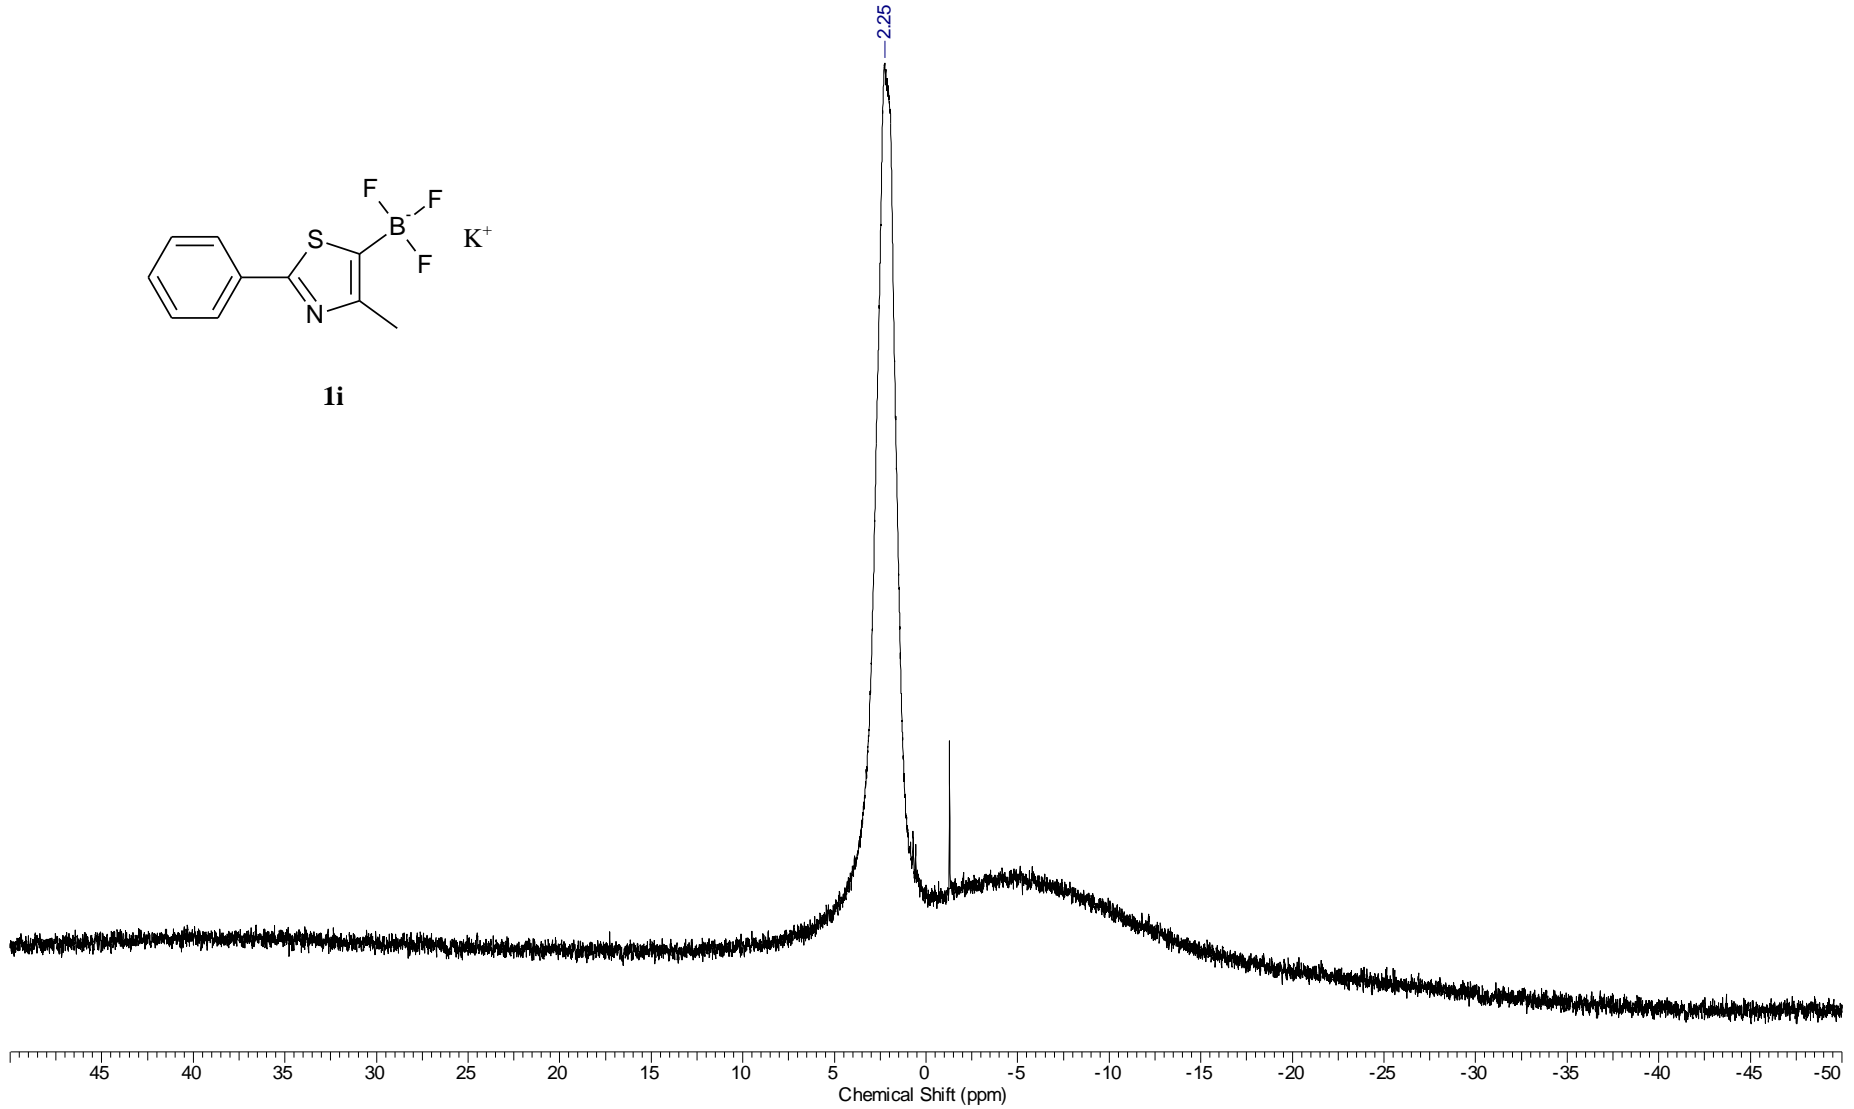

|                       |         |                      |                 |                      |          |                        |                     |
|-----------------------|---------|----------------------|-----------------|----------------------|----------|------------------------|---------------------|
| Frequency (MHz)       | 376.71  | Nucleus              | <sup>19</sup> F | Number of Transients | 64       | Origin                 | Bruker BioSpin GmbH |
| Original Points Count | 131072  | Owner                | tibbe_operator  | Points Count         | 131072   | SW(cyclical) (Hz)      | 93749.28            |
| Solvent               | DMSO-d6 | Spectrum Offset (Hz) | -37674.7617     | Sweep Width (Hz)     | 93748.56 | Temperature (degree C) | 27.000              |

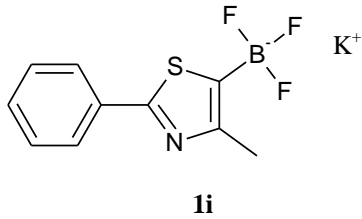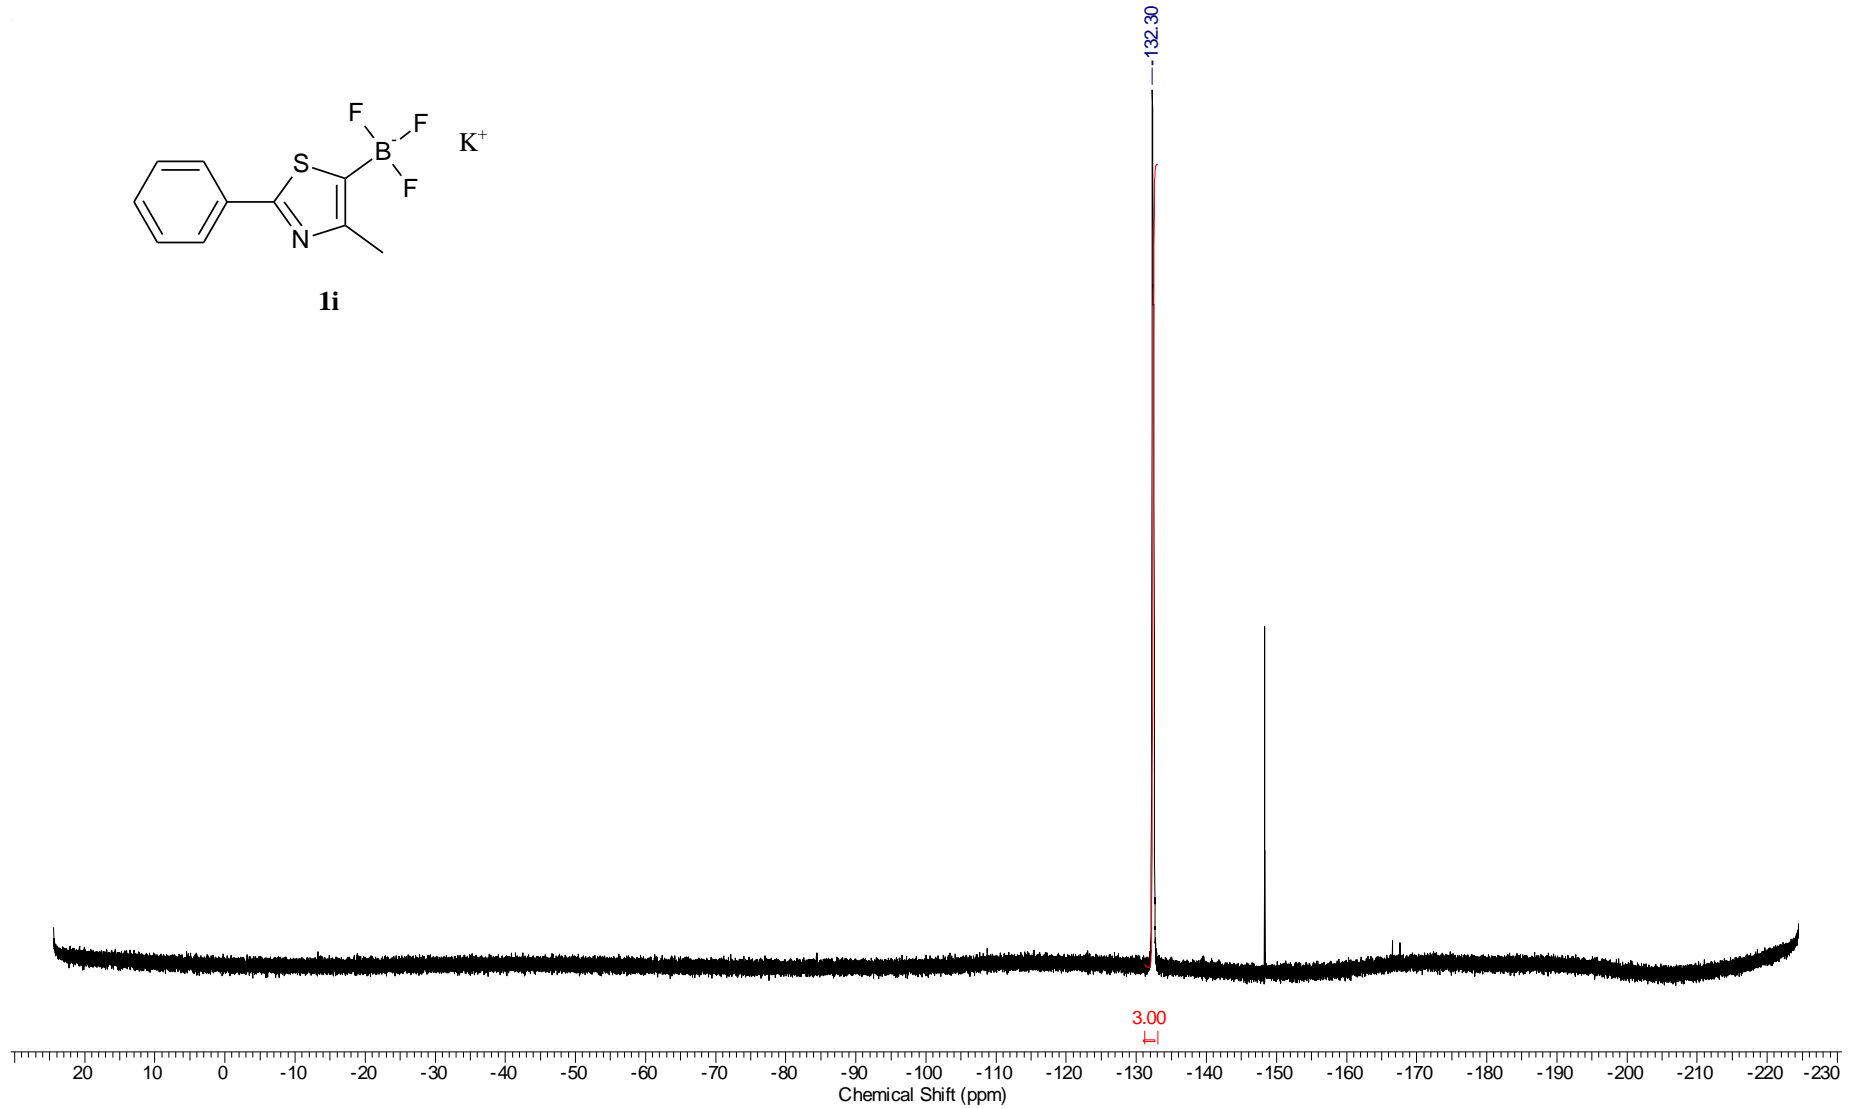

|                       |         |                      |                |                      |         |                        |                     |
|-----------------------|---------|----------------------|----------------|----------------------|---------|------------------------|---------------------|
| Frequency (MHz)       | 400.40  | Nucleus              | <sup>1</sup> H | Number of Transients | 16      | Origin                 | Bruker BioSpin GmbH |
| Original Points Count | 32768   | Owner                | tibbe_operator | Points Count         | 32768   | SW(cyclical) (Hz)      | 7211.32             |
| Solvent               | DMSO-d6 | Spectrum Offset (Hz) | 3398.5825      | Sweep Width (Hz)     | 7211.10 | Temperature (degree C) | 27.000              |

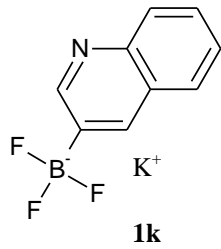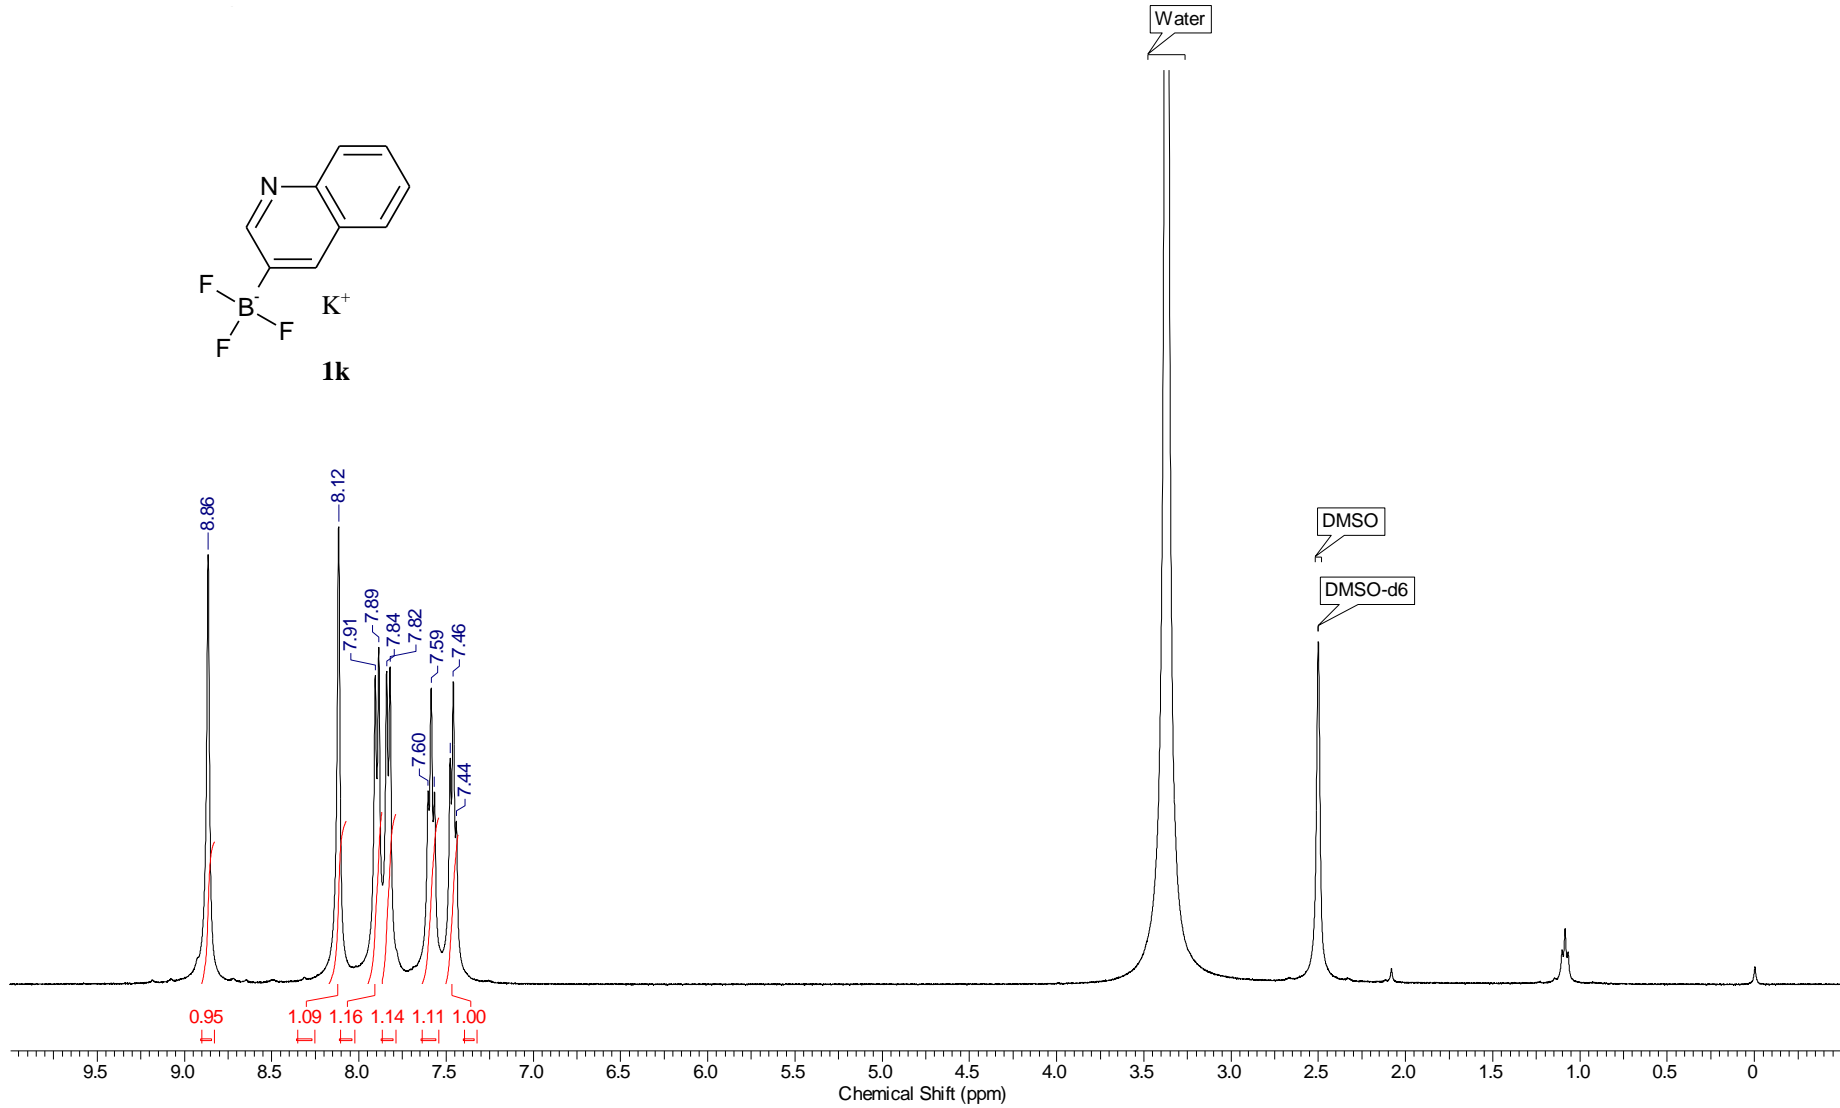



|                       |         |                      |                 |                      |          |                        |                     |
|-----------------------|---------|----------------------|-----------------|----------------------|----------|------------------------|---------------------|
| Frequency (MHz)       | 100.69  | Nucleus              | <sup>13</sup> C | Number of Transients | 1024     | Origin                 | Bruker BioSpin GmbH |
| Original Points Count | 32768   | Owner                | tibbe_operator  | Points Count         | 32768    | SW(cyclical) (Hz)      | 24037.73            |
| Solvent               | DMSO-d6 | Spectrum Offset (Hz) | 10020.3662      | Sweep Width (Hz)     | 24036.99 | Temperature (degree C) | 27.000              |

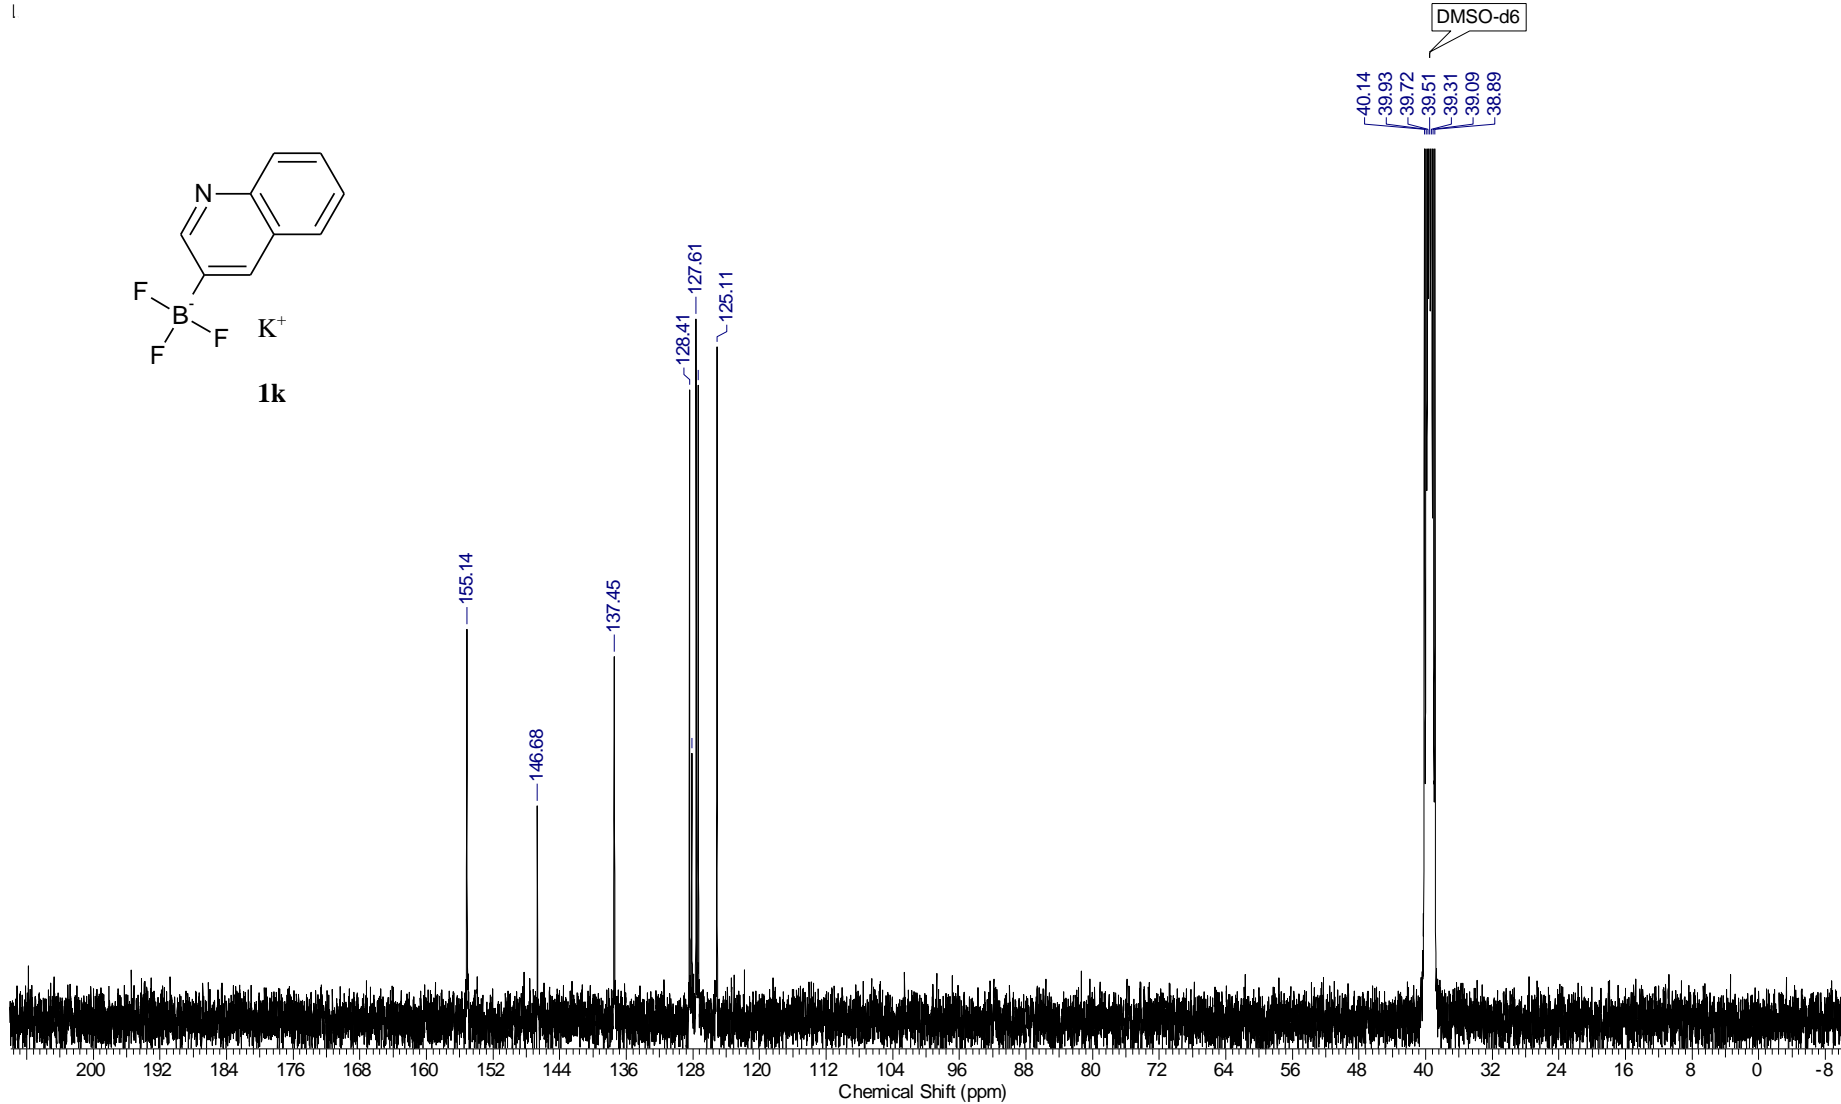

|                       |         |                      |                |                      |          |                        |                     |
|-----------------------|---------|----------------------|----------------|----------------------|----------|------------------------|---------------------|
| Frequency (MHz)       | 128.46  | Nucleus              | 11B            | Number of Transients | 128      | Origin                 | Bruker BioSpin GmbH |
| Original Points Count | 32768   | Owner                | tibbe_operator | Points Count         | 32768    | SW(cyclical) (Hz)      | 25509.43            |
| Solvent               | DMSO-d6 | Spectrum Offset (Hz) | 1.2842         | Sweep Width (Hz)     | 25508.65 | Temperature (degree C) | 27.000              |

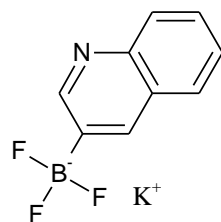

1k

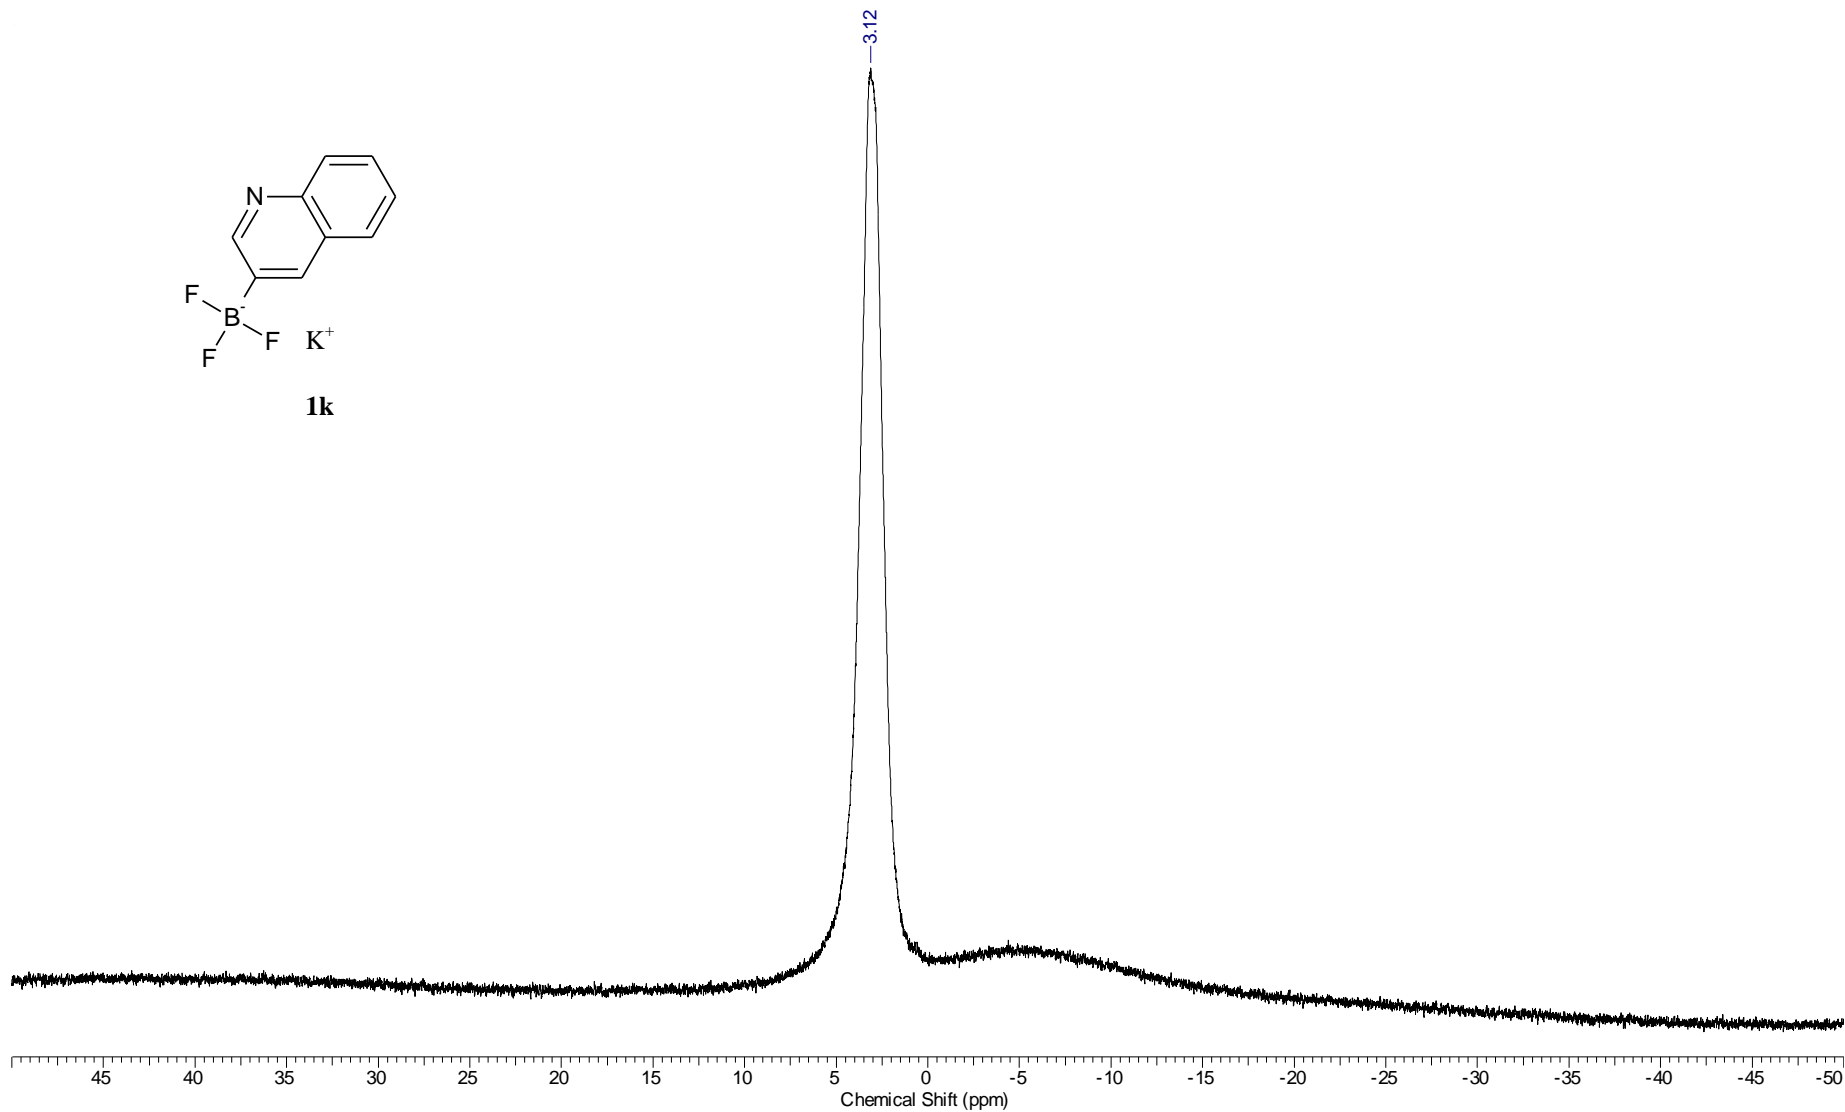

|                       |         |                      |                 |                      |          |                        |                     |
|-----------------------|---------|----------------------|-----------------|----------------------|----------|------------------------|---------------------|
| Frequency (MHz)       | 376.71  | Nucleus              | <sup>19</sup> F | Number of Transients | 64       | Origin                 | Bruker BioSpin GmbH |
| Original Points Count | 131072  | Owner                | tibbe_operator  | Points Count         | 131072   | SW(cyclical) (Hz)      | 93749.28            |
| Solvent               | DMSO-d6 | Spectrum Offset (Hz) | -37674.7617     | Sweep Width (Hz)     | 93748.56 | Temperature (degree C) | 27.000              |

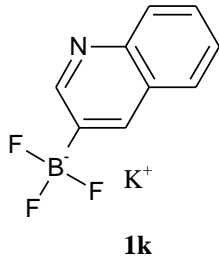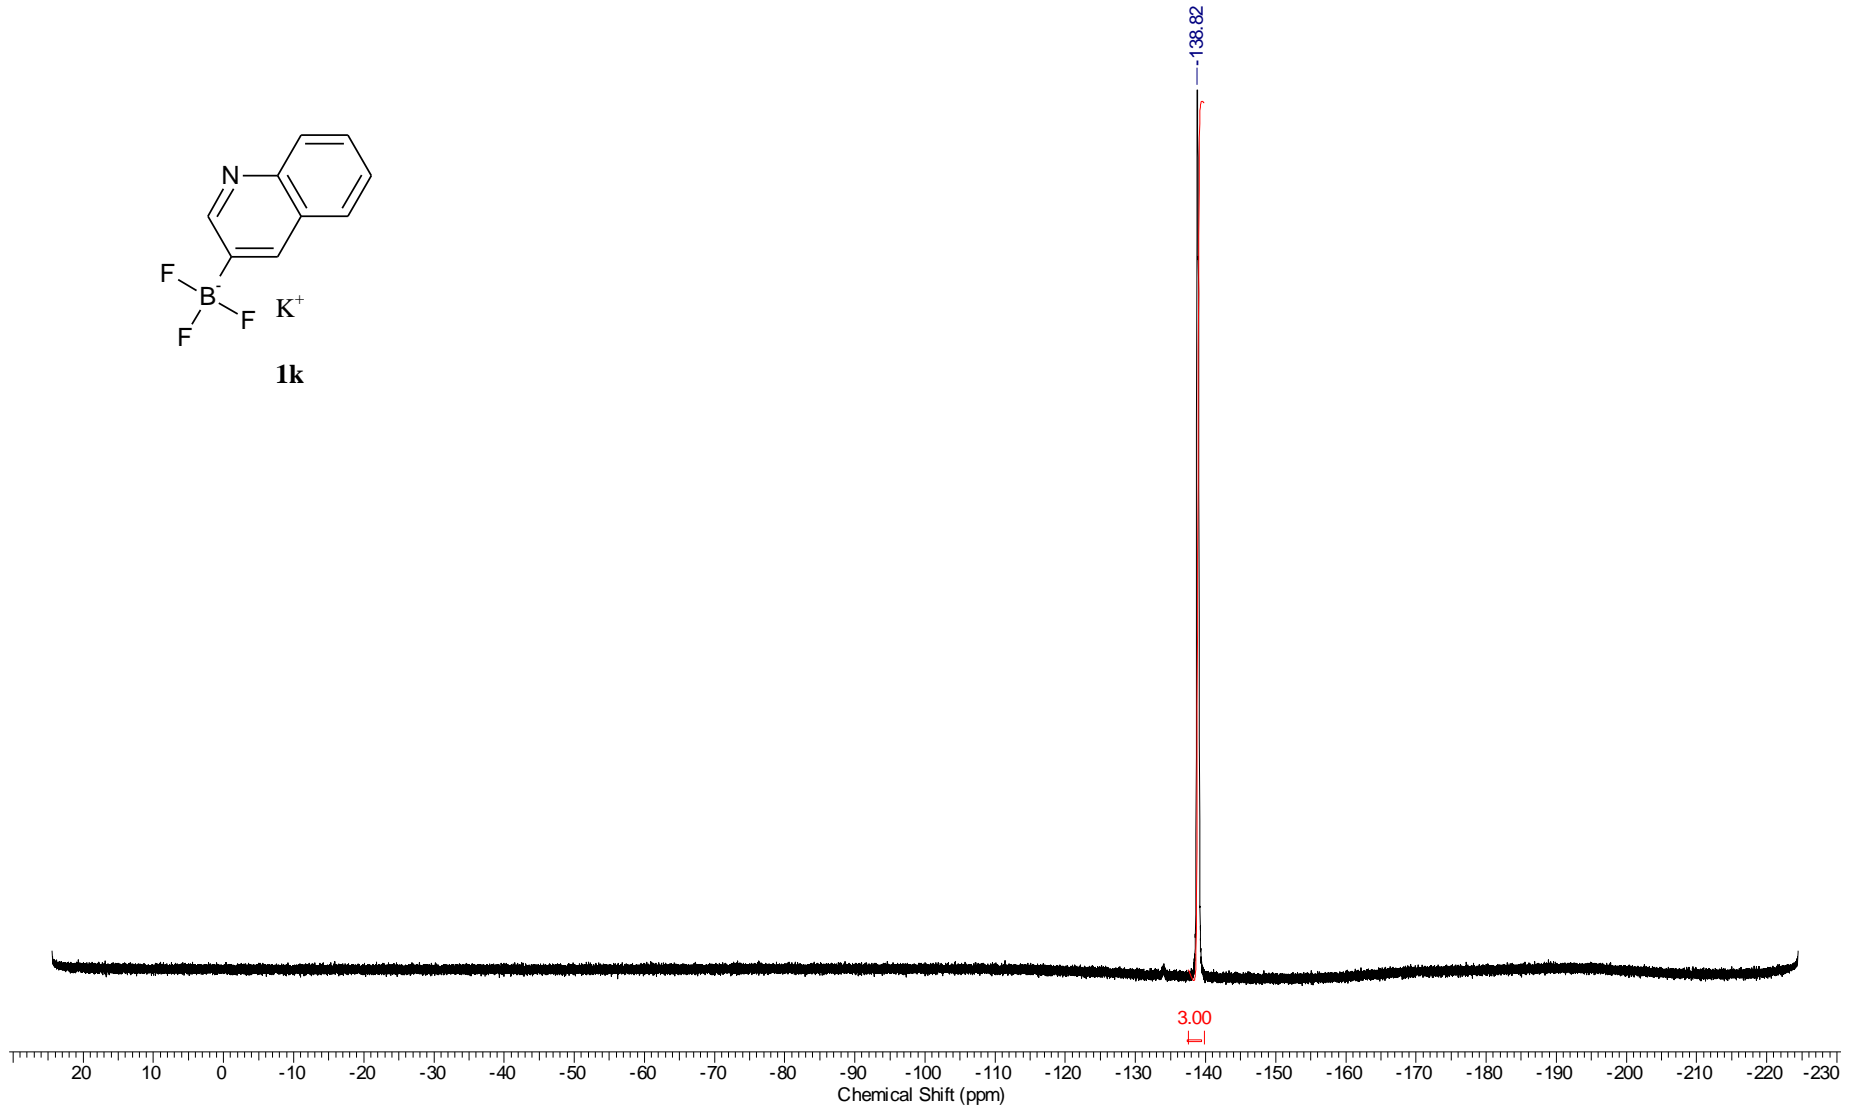

|                       |         |                      |                |                      |         |                        |                     |
|-----------------------|---------|----------------------|----------------|----------------------|---------|------------------------|---------------------|
| Frequency (MHz)       | 400.40  | Nucleus              | 1H             | Number of Transients | 16      | Origin                 | Bruker BioSpin GmbH |
| Original Points Count | 32768   | Owner                | tibbe_operator | Points Count         | 32768   | SW(cyclical) (Hz)      | 7211.32             |
| Solvent               | DMSO-d6 | Spectrum Offset (Hz) | 3398.5825      | Sweep Width (Hz)     | 7211.10 | Temperature (degree C) | 27.000              |

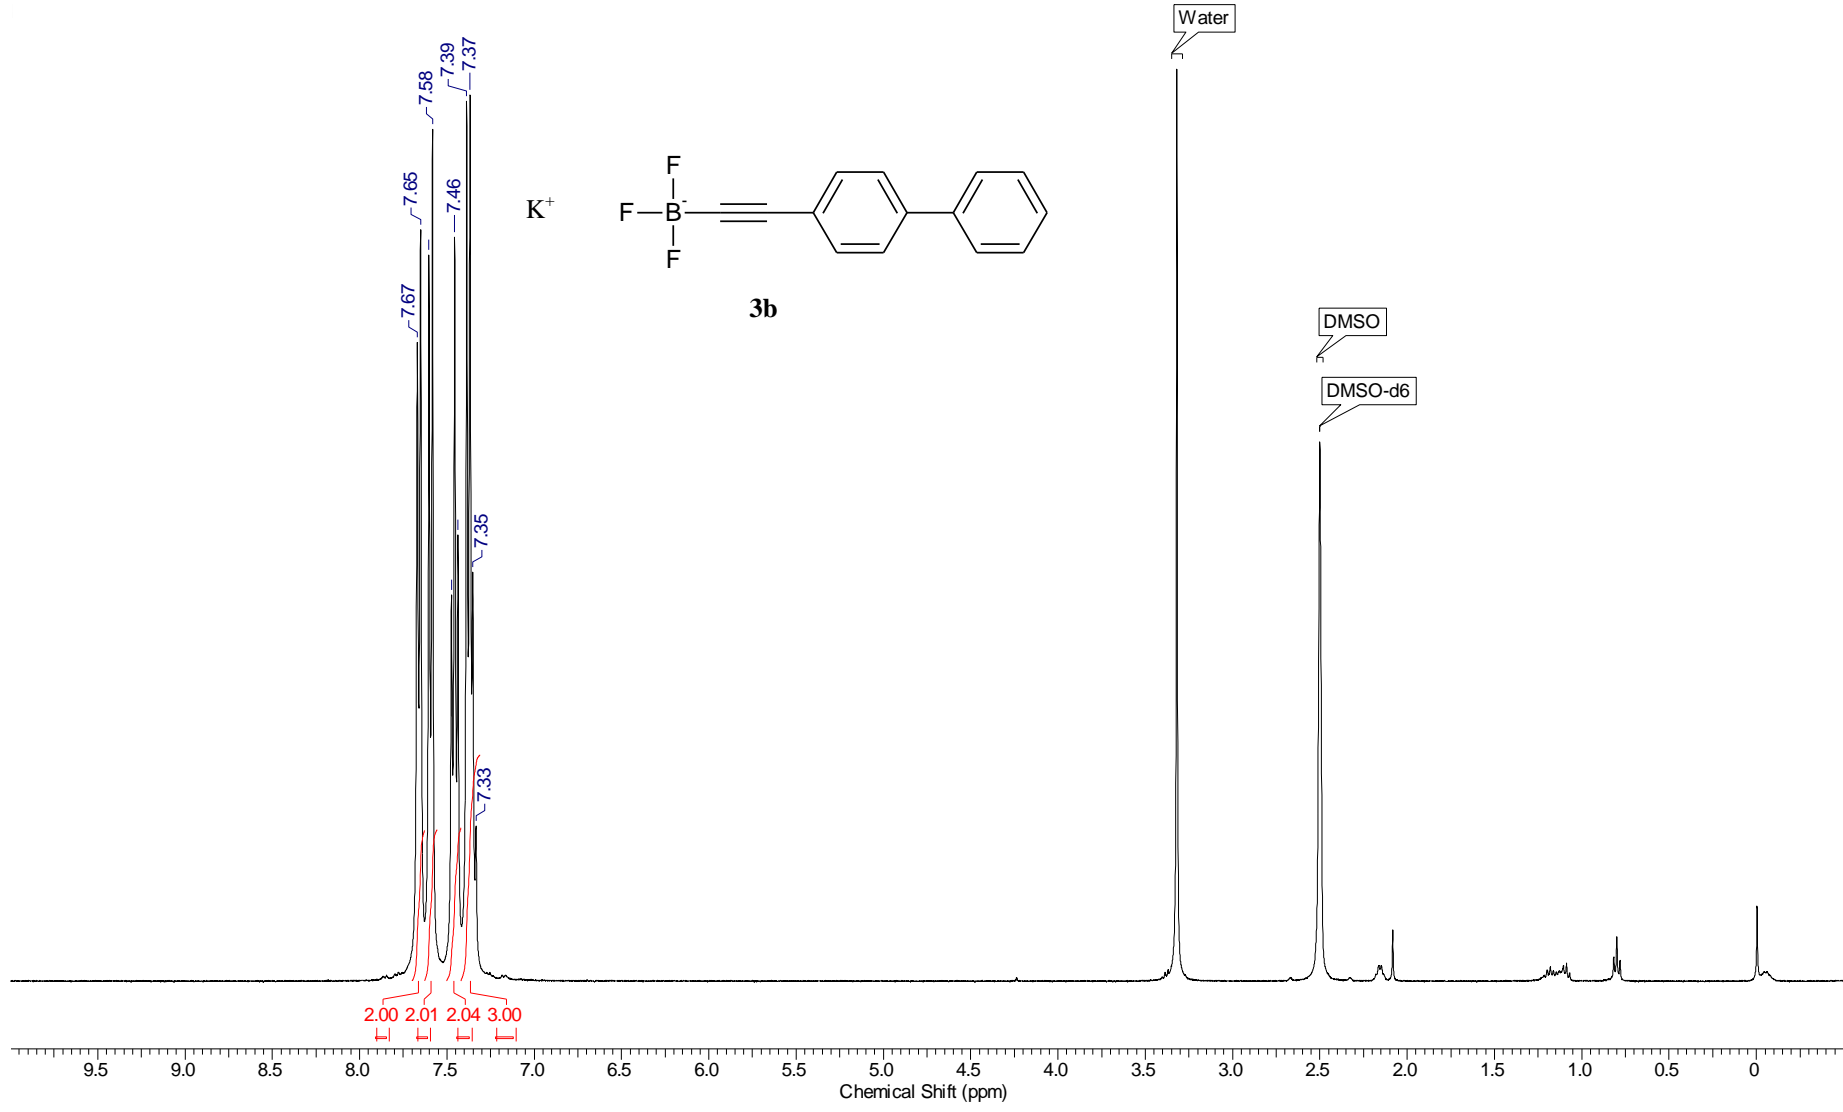

|                              |         |                             |                 |                             |          |                               |                     |
|------------------------------|---------|-----------------------------|-----------------|-----------------------------|----------|-------------------------------|---------------------|
| <b>Frequency (MHz)</b>       | 100.69  | <b>Nucleus</b>              | <sup>13</sup> C | <b>Number of Transients</b> | 1024     | <b>Origin</b>                 | Bruker BioSpin GmbH |
| <b>Original Points Count</b> | 32768   | <b>Owner</b>                | tibbe_operator  | <b>Points Count</b>         | 32768    | <b>SW(cyclical) (Hz)</b>      | 24037.73            |
| <b>Solvent</b>               | DMSO-d6 | <b>Spectrum Offset (Hz)</b> | 10016.6982      | <b>Sweep Width (Hz)</b>     | 24036.99 | <b>Temperature (degree C)</b> | 27.000              |

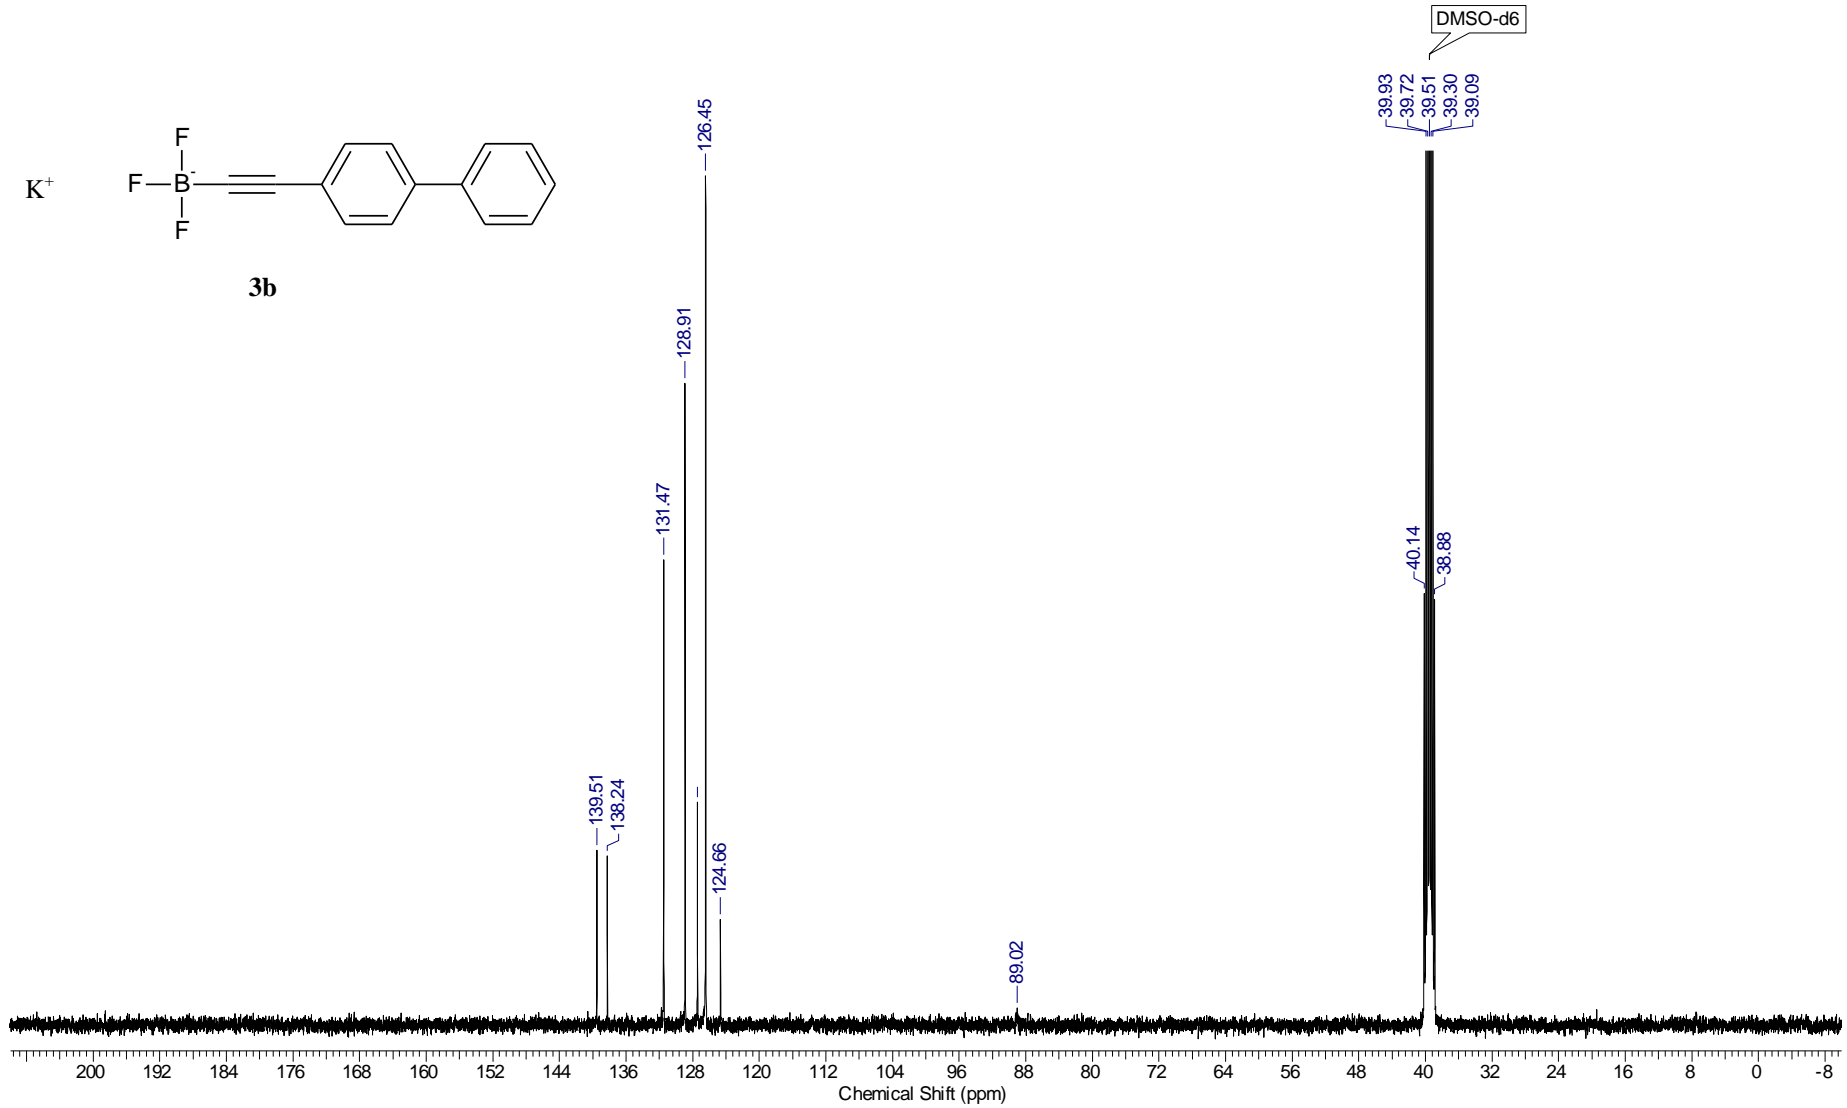

|                       |         |                      |                |                      |          |                        |                     |
|-----------------------|---------|----------------------|----------------|----------------------|----------|------------------------|---------------------|
| Frequency (MHz)       | 128.46  | Nucleus              | 11B            | Number of Transients | 128      | Origin                 | Bruker BioSpin GmbH |
| Original Points Count | 32768   | Owner                | tibbe_operator | Points Count         | 32768    | SW(cyclical) (Hz)      | 25509.43            |
| Solvent               | DMSO-d6 | Spectrum Offset (Hz) | 1.2842         | Sweep Width (Hz)     | 25508.65 | Temperature (degree C) | 27.000              |

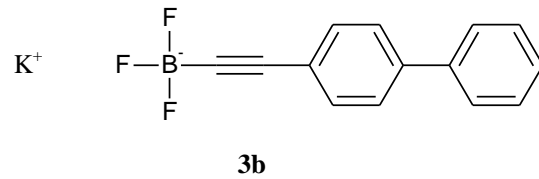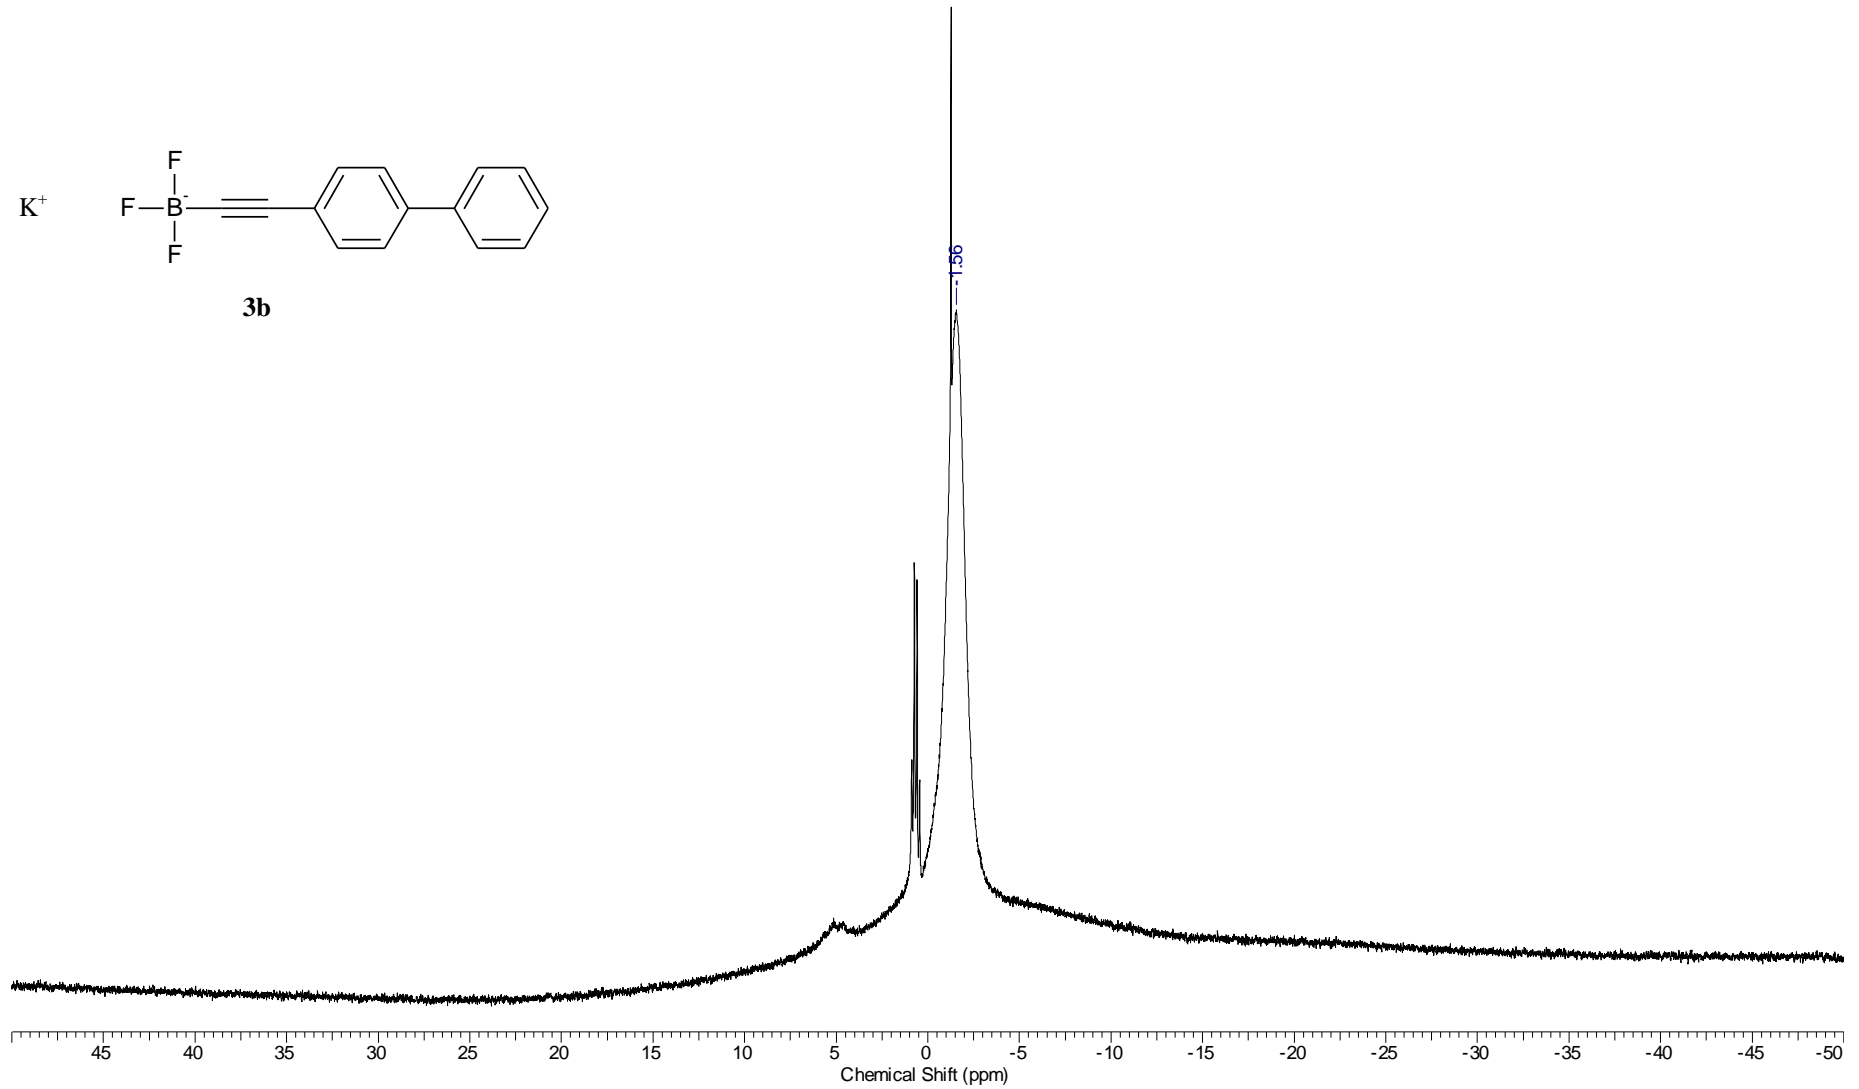

|                       |         |                      |                 |                      |          |                        |                     |
|-----------------------|---------|----------------------|-----------------|----------------------|----------|------------------------|---------------------|
| Frequency (MHz)       | 376.71  | Nucleus              | <sup>19</sup> F | Number of Transients | 64       | Origin                 | Bruker BioSpin GmbH |
| Original Points Count | 131072  | Owner                | tibbe_operator  | Points Count         | 131072   | SW(cyclical) (Hz)      | 93749.28            |
| Solvent               | DMSO-d6 | Spectrum Offset (Hz) | -37674.7617     | Sweep Width (Hz)     | 93748.56 | Temperature (degree C) | 27.000              |

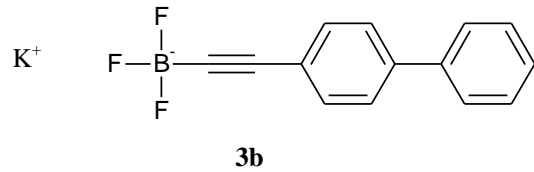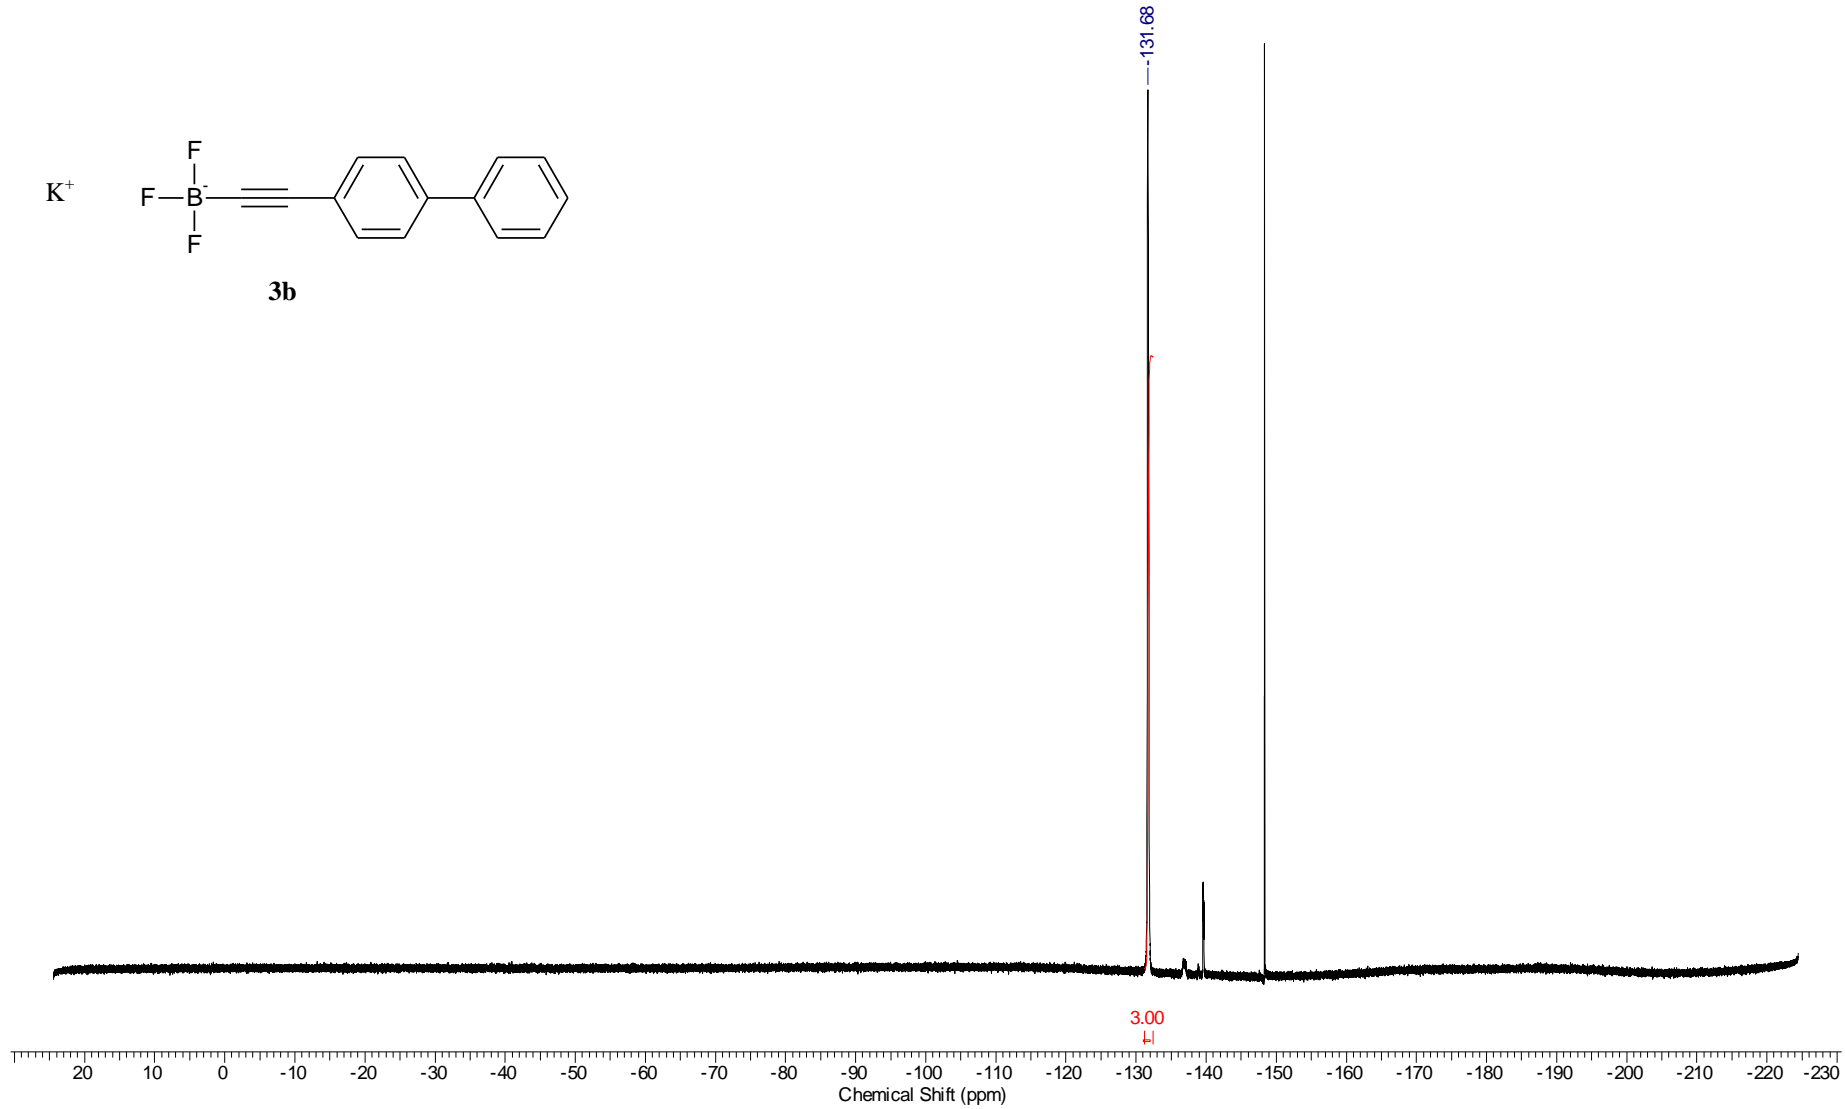

|                       |         |                      |                |                      |         |                        |                     |
|-----------------------|---------|----------------------|----------------|----------------------|---------|------------------------|---------------------|
| Frequency (MHz)       | 400.40  | Nucleus              | 1H             | Number of Transients | 16      | Origin                 | Bruker BioSpin GmbH |
| Original Points Count | 32768   | Owner                | tibbe_operator | Points Count         | 32768   | SW(cyclical) (Hz)      | 7211.32             |
| Solvent               | DMSO-d6 | Spectrum Offset (Hz) | 3398.5825      | Sweep Width (Hz)     | 7211.10 | Temperature (degree C) | 27.000              |

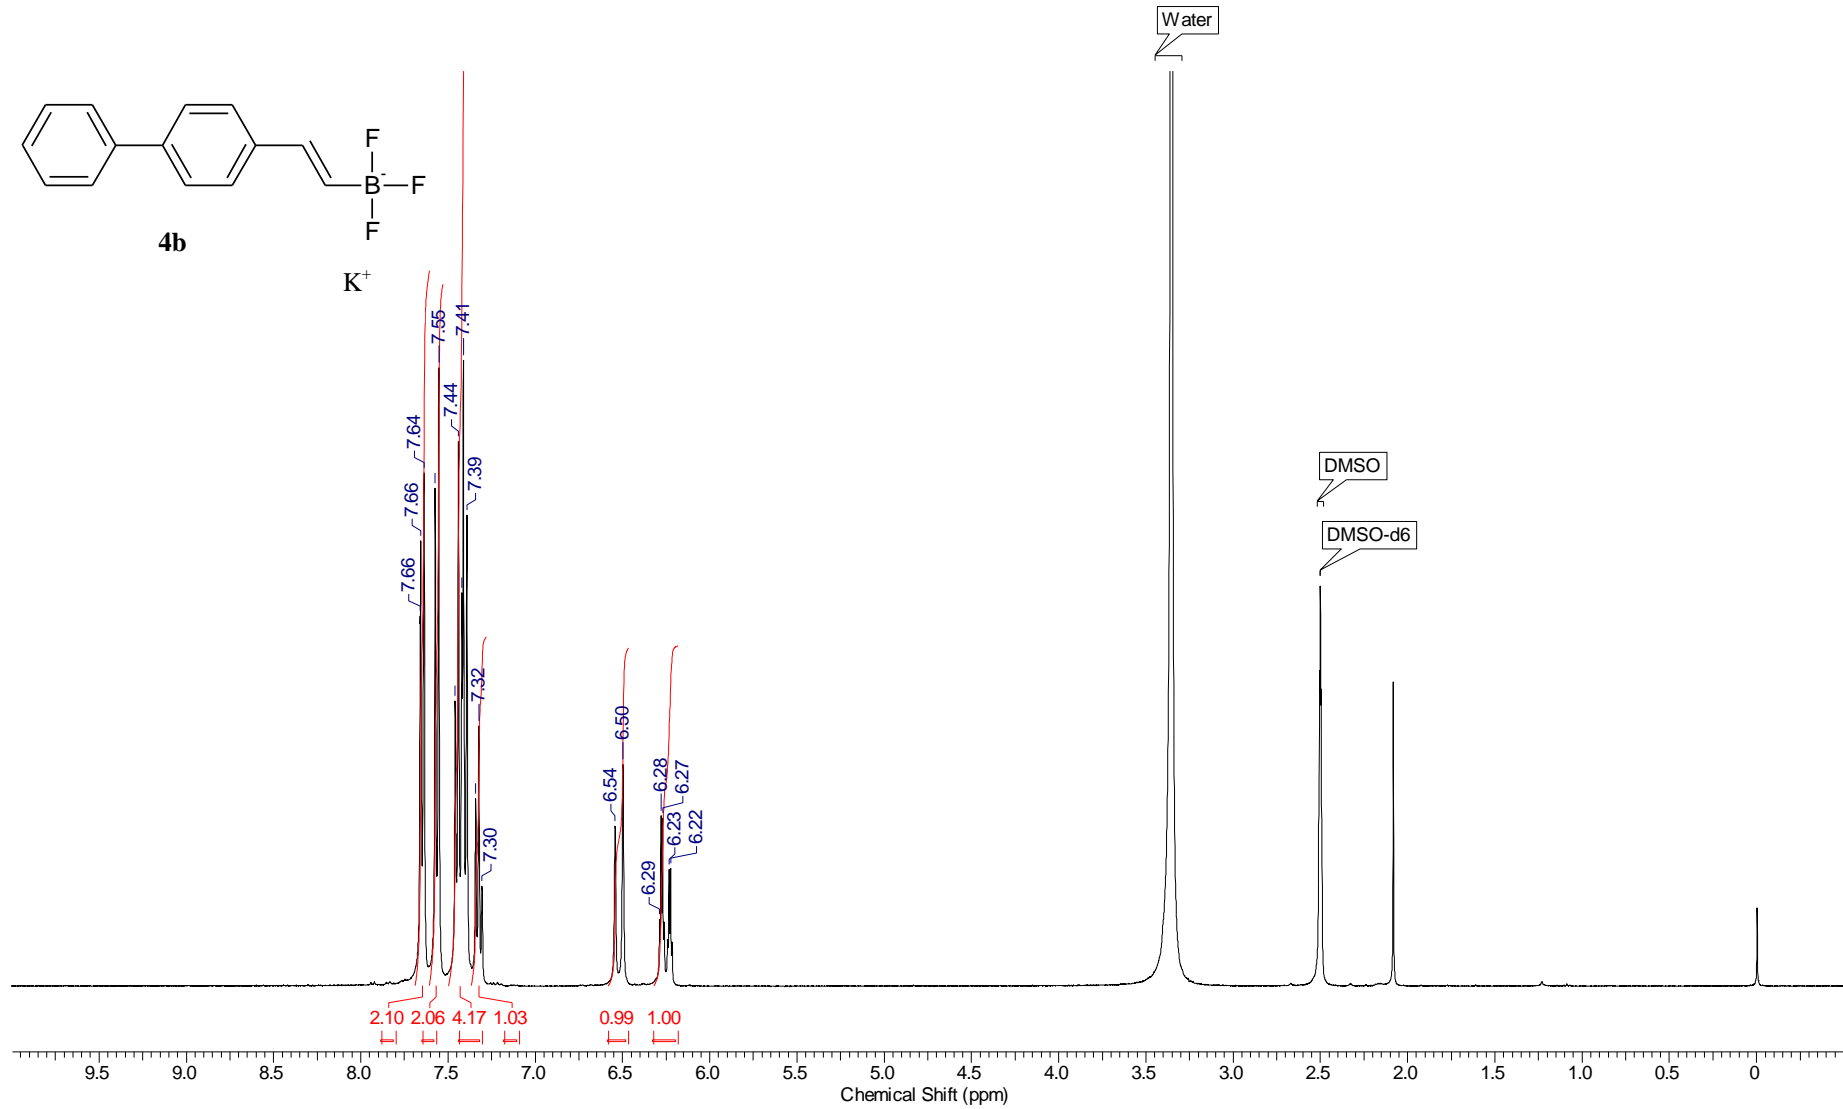



|                       |         |                      |                 |                      |          |                        |                     |
|-----------------------|---------|----------------------|-----------------|----------------------|----------|------------------------|---------------------|
| Frequency (MHz)       | 100.69  | Nucleus              | <sup>13</sup> C | Number of Transients | 1024     | Origin                 | Bruker BioSpin GmbH |
| Original Points Count | 32768   | Owner                | tibbe_operator  | Points Count         | 32768    | SW(cyclical) (Hz)      | 24037.73            |
| Solvent               | DMSO-d6 | Spectrum Offset (Hz) | 10020.3662      | Sweep Width (Hz)     | 24036.99 | Temperature (degree C) | 27.000              |

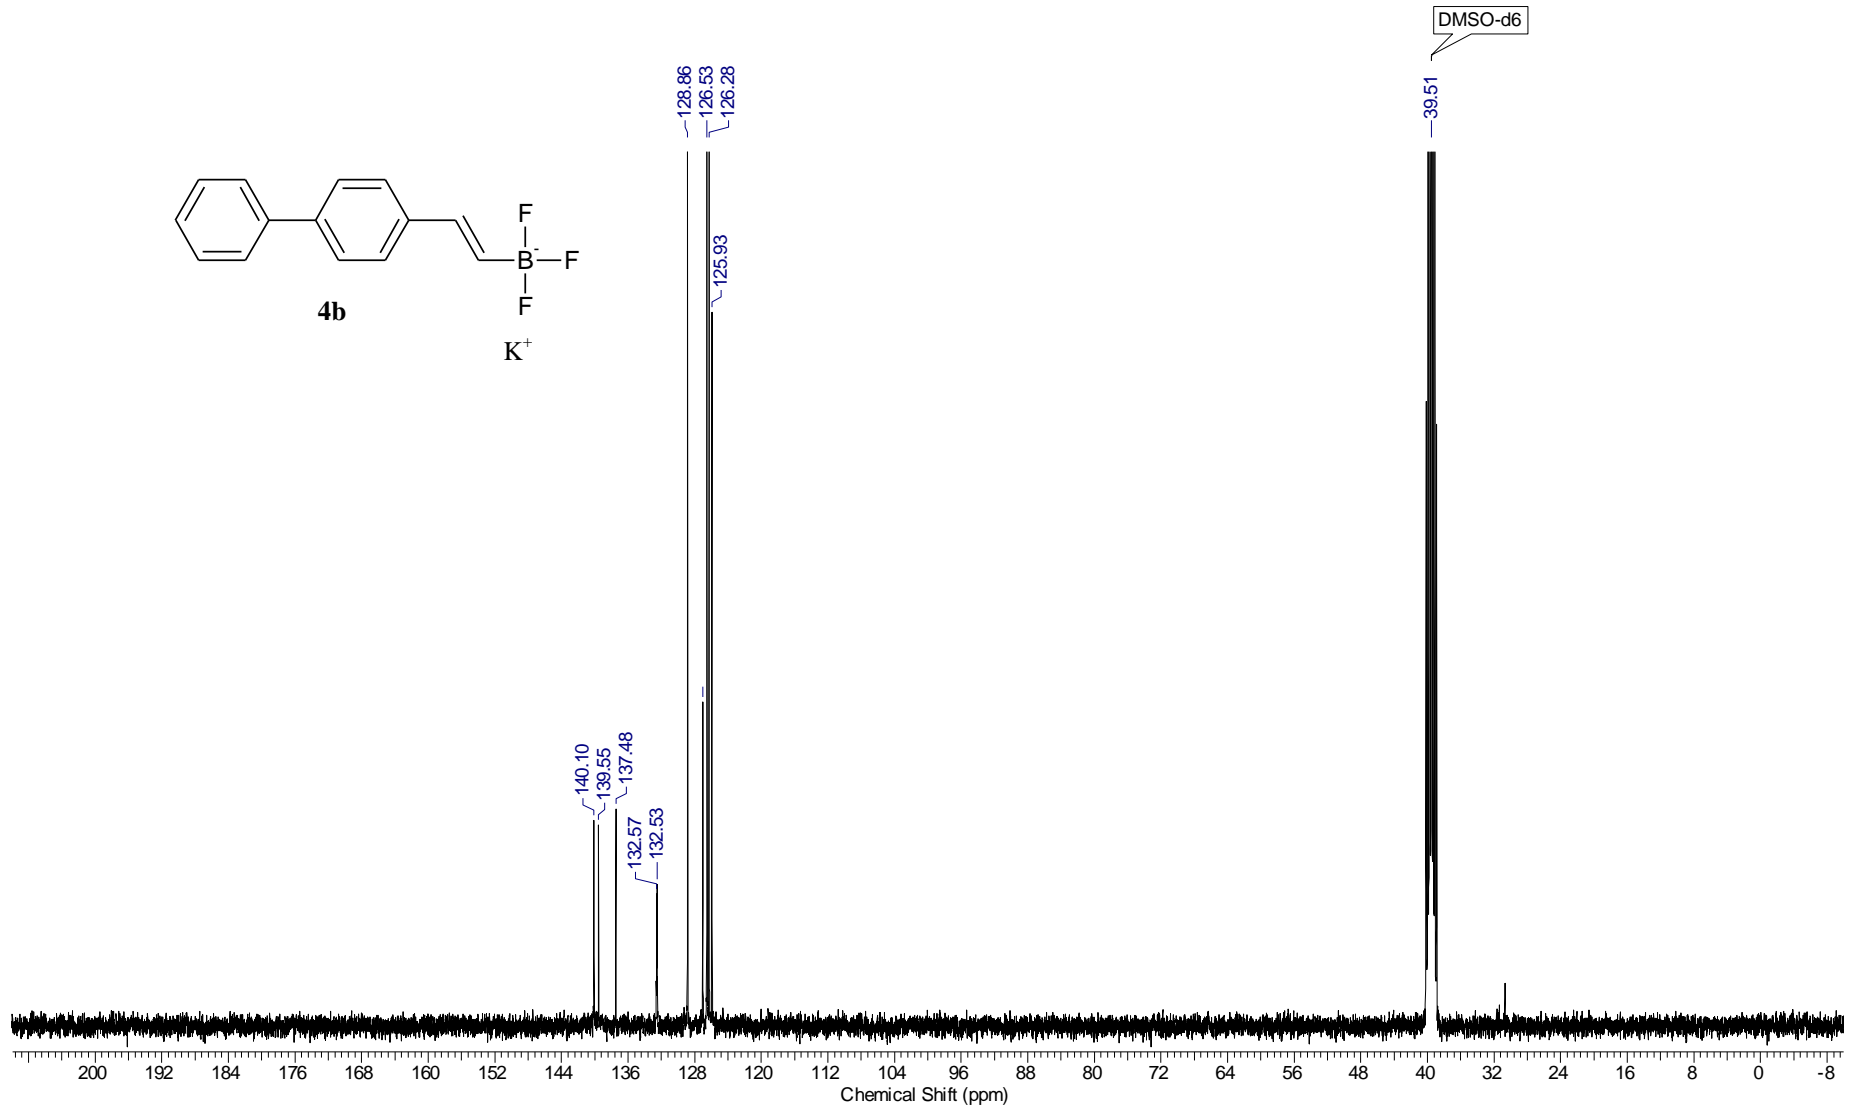

|                              |         |                             |                |                             |          |                               |                     |
|------------------------------|---------|-----------------------------|----------------|-----------------------------|----------|-------------------------------|---------------------|
| <b>Frequency (MHz)</b>       | 128.46  | <b>Nucleus</b>              | 11B            | <b>Number of Transients</b> | 128      | <b>Origin</b>                 | Bruker BioSpin GmbH |
| <b>Original Points Count</b> | 32768   | <b>Owner</b>                | tibbe_operator | <b>Points Count</b>         | 32768    | <b>SW(cyclical) (Hz)</b>      | 25509.43            |
| <b>Solvent</b>               | DMSO-d6 | <b>Spectrum Offset (Hz)</b> | 1.2842         | <b>Sweep Width (Hz)</b>     | 25508.65 | <b>Temperature (degree C)</b> | 27.000              |

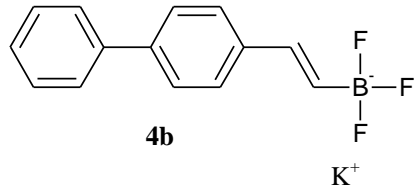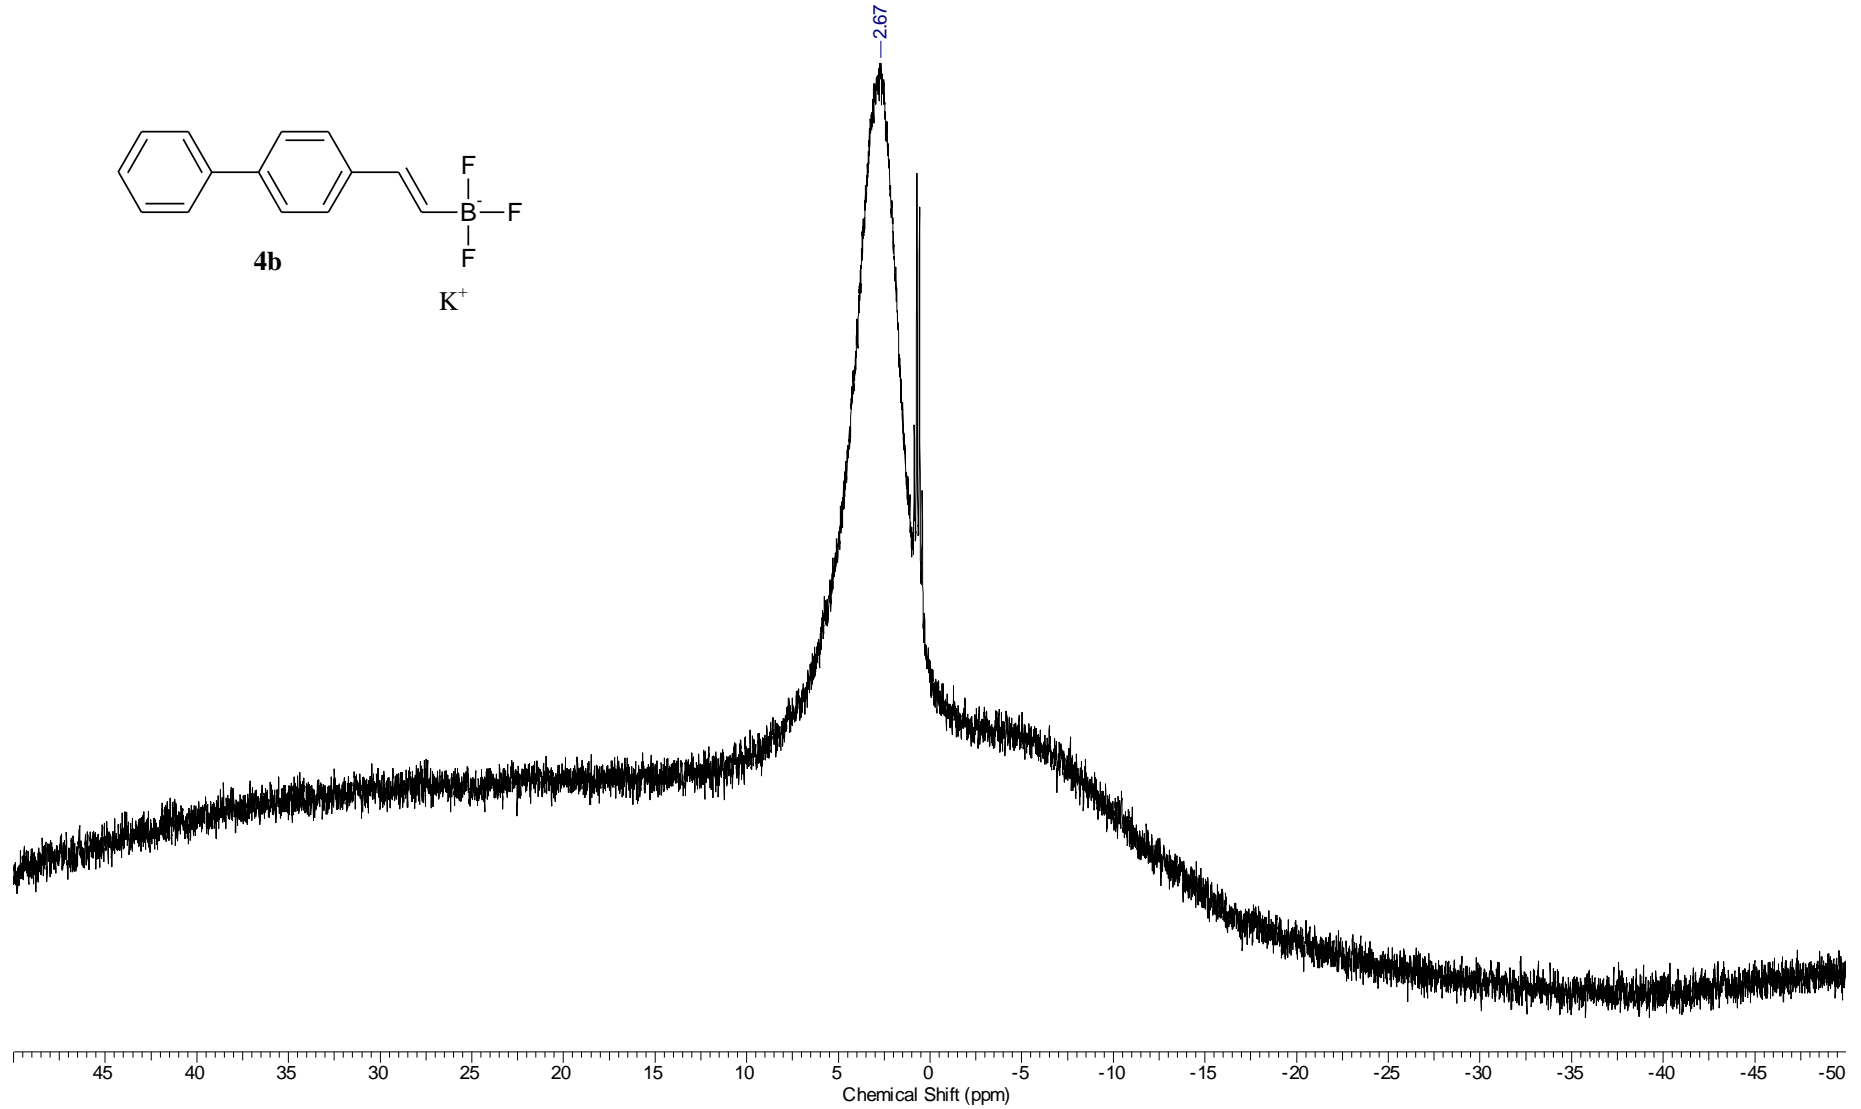

|                       |         |                      |                 |                      |          |                        |                     |
|-----------------------|---------|----------------------|-----------------|----------------------|----------|------------------------|---------------------|
| Frequency (MHz)       | 376.71  | Nucleus              | <sup>19</sup> F | Number of Transients | 64       | Origin                 | Bruker BioSpin GmbH |
| Original Points Count | 131072  | Owner                | tibbe_operator  | Points Count         | 131072   | SW(cyclical) (Hz)      | 93749.28            |
| Solvent               | DMSO-d6 | Spectrum Offset (Hz) | -37674.7617     | Sweep Width (Hz)     | 93748.56 | Temperature (degree C) | 27.000              |

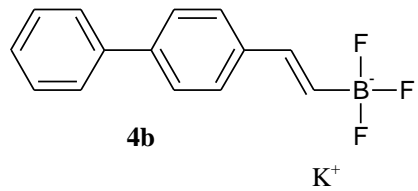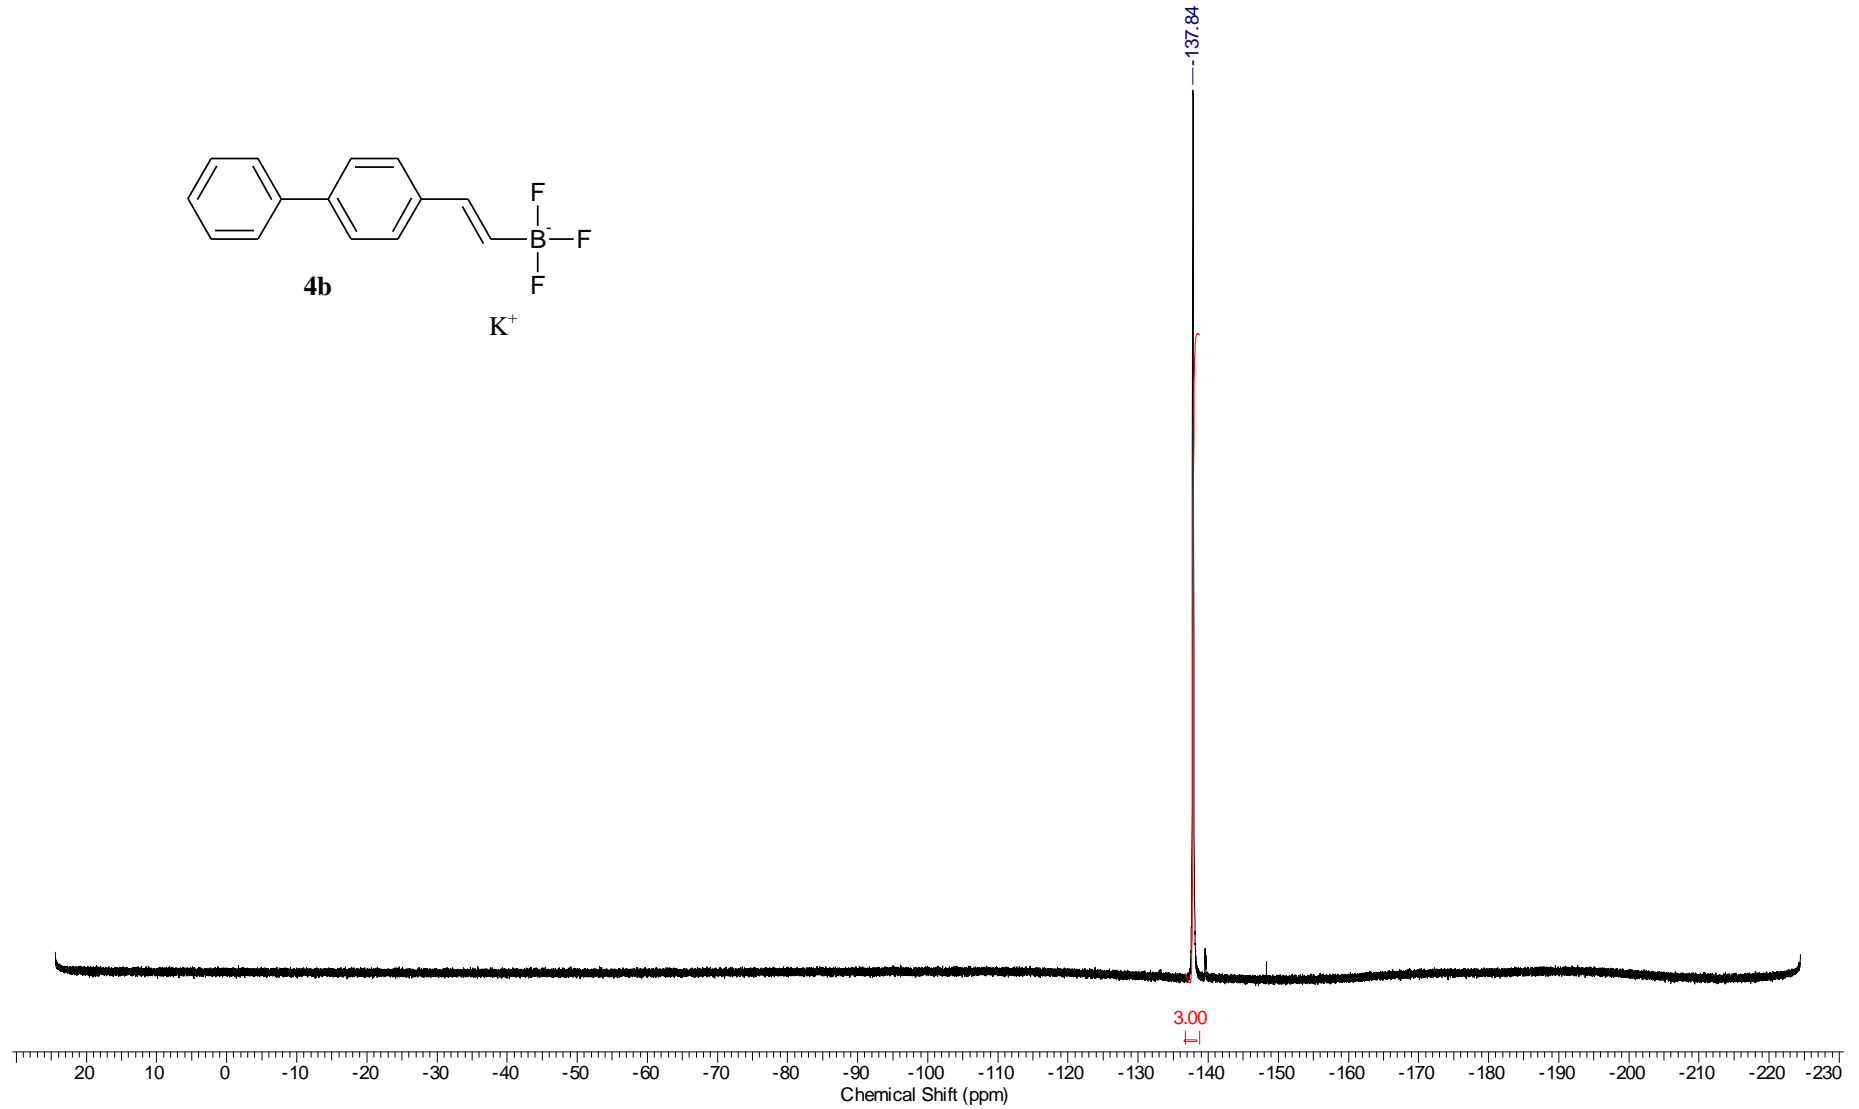

|                       |              |                      |                |                      |         |                        |                     |
|-----------------------|--------------|----------------------|----------------|----------------------|---------|------------------------|---------------------|
| Frequency (MHz)       | 400.40       | Nucleus              | 1H             | Number of Transients | 16      | Origin                 | Bruker BioSpin GmbH |
| Original Points Count | 32768        | Owner                | tibbe_operator | Points Count         | 32768   | SW(cyclical) (Hz)      | 7211.32             |
| Solvent               | CHLOROFORM-d | Spectrum Offset (Hz) | 3395.8613      | Sweep Width (Hz)     | 7211.10 | Temperature (degree C) | 27.000              |

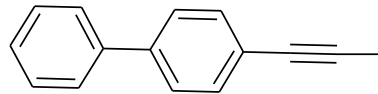

**4-(Propyn-1-yl)-biphenyl**

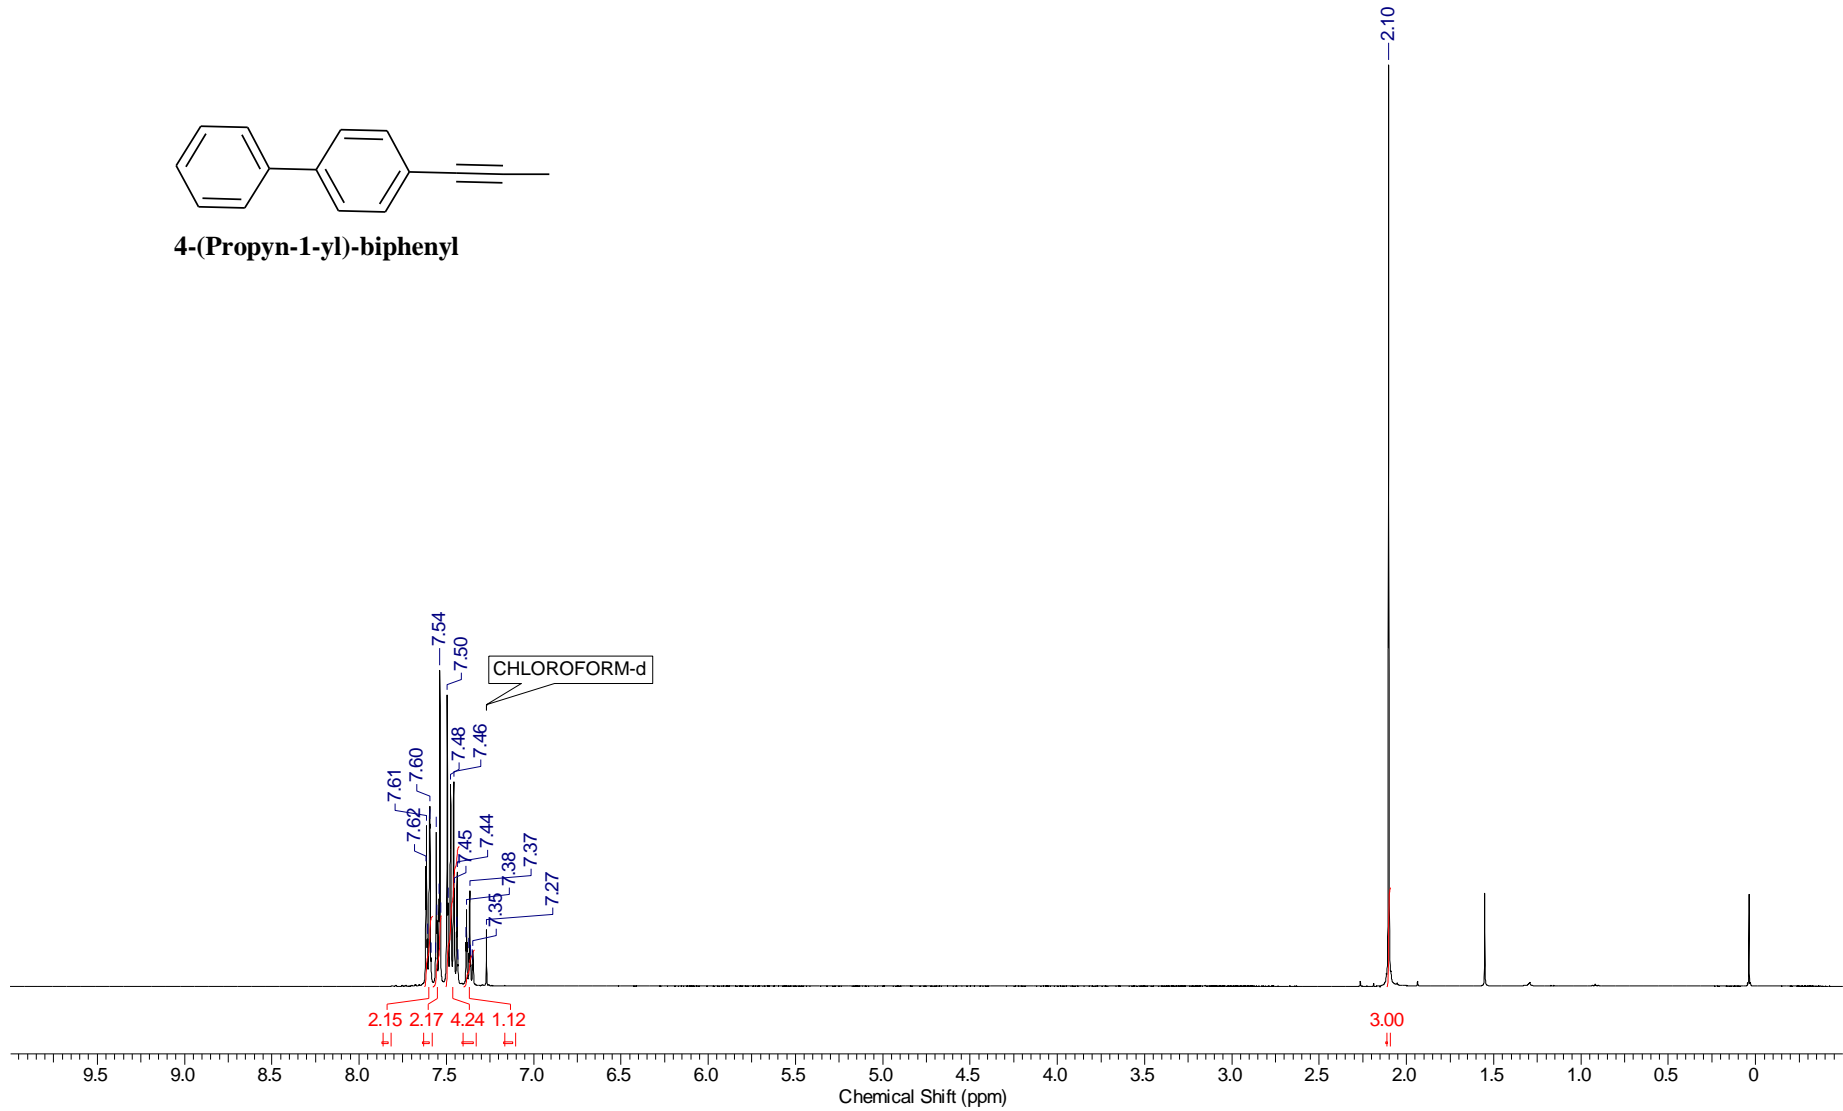

|                       |              |                      |                 |                      |          |                        |                     |
|-----------------------|--------------|----------------------|-----------------|----------------------|----------|------------------------|---------------------|
| Frequency (MHz)       | 100.69       | Nucleus              | <sup>13</sup> C | Number of Transients | 1024     | Origin                 | Bruker BioSpin GmbH |
| Original Points Count | 32768        | Owner                | tibbe_operator  | Points Count         | 32768    | SW(cyclical) (Hz)      | 24037.73            |
| Solvent               | CHLOROFORM-d | Spectrum Offset (Hz) | 10063.5742      | Sweep Width (Hz)     | 24036.99 | Temperature (degree C) | 27.000              |

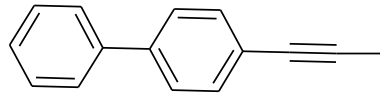

4-(Propyn-1-yl)-biphenyl

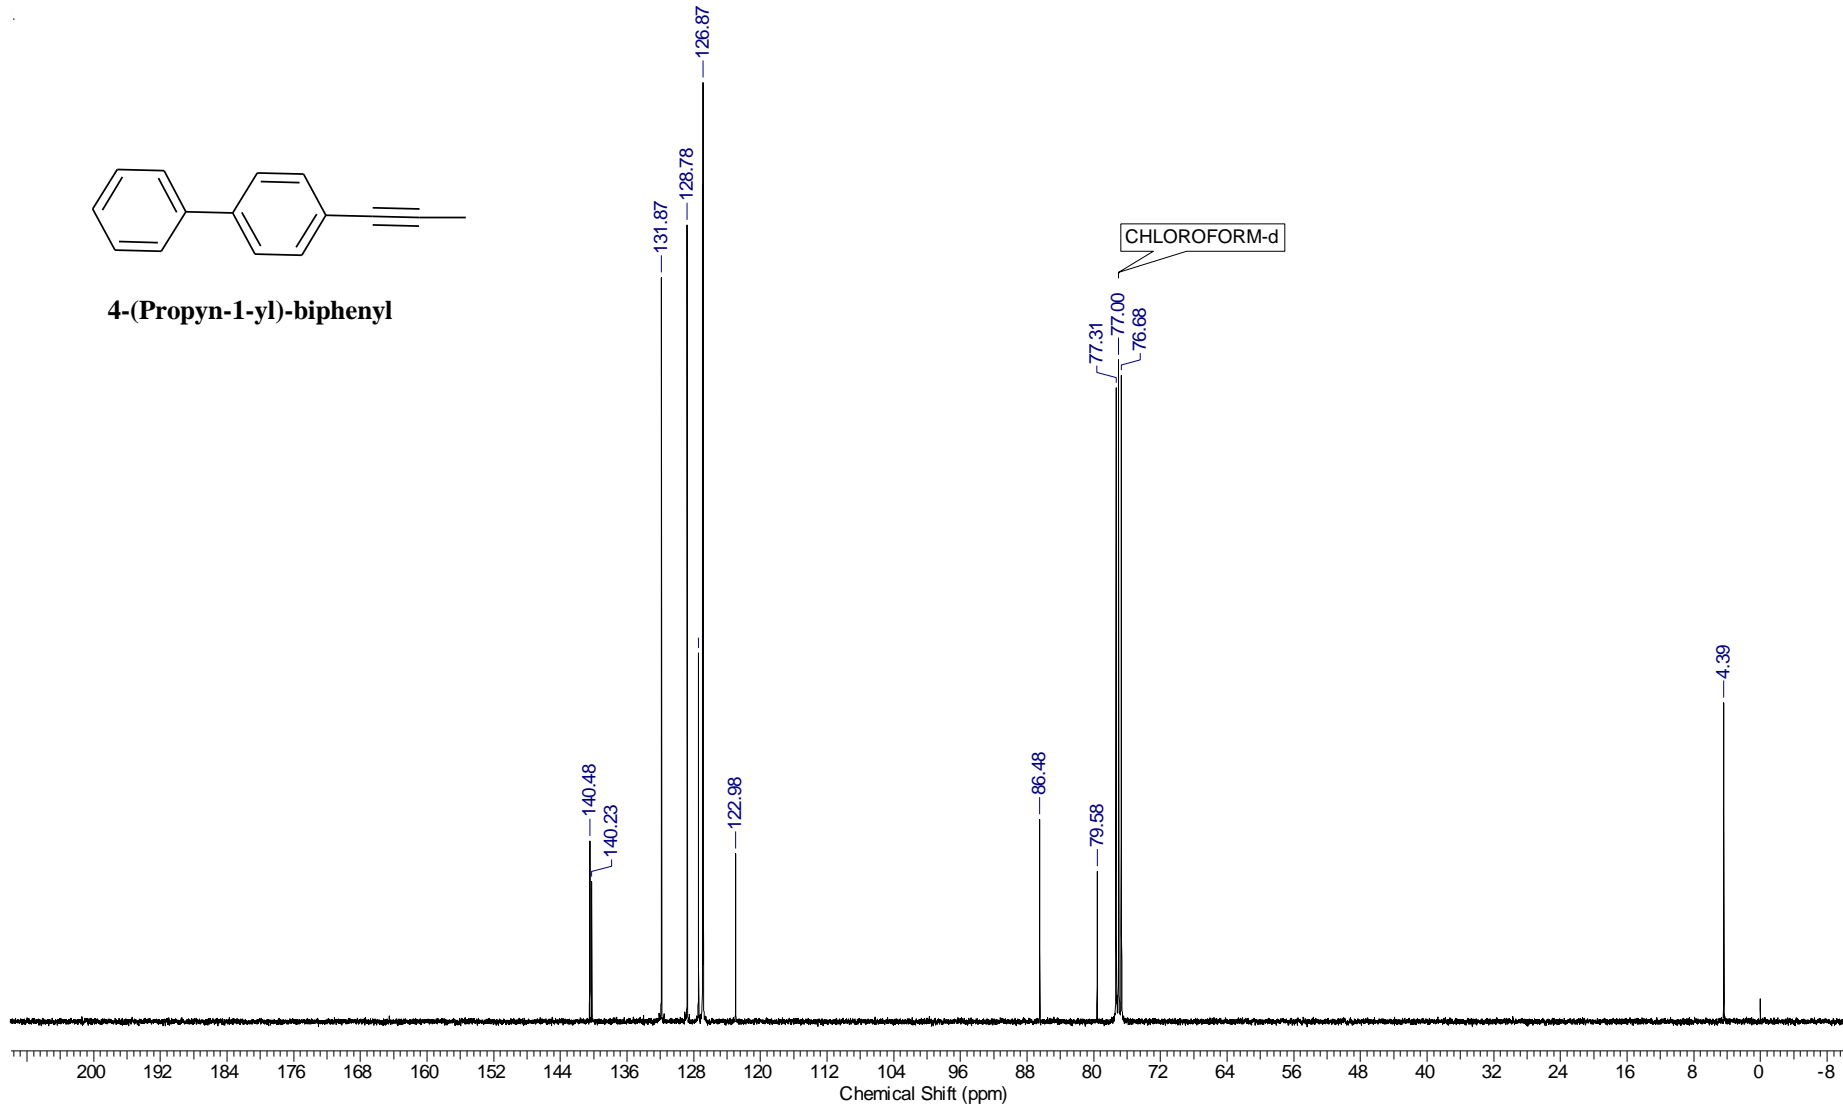

|                       |         |                      |                |                      |         |                        |                     |
|-----------------------|---------|----------------------|----------------|----------------------|---------|------------------------|---------------------|
| Frequency (MHz)       | 400.40  | Nucleus              | 1H             | Number of Transients | 16      | Origin                 | Bruker BioSpin GmbH |
| Original Points Count | 32768   | Owner                | tibbe_operator | Points Count         | 32768   | SW(cyclical) (Hz)      | 7211.32             |
| Solvent               | DMSO-d6 | Spectrum Offset (Hz) | 3398.8027      | Sweep Width (Hz)     | 7211.10 | Temperature (degree C) | 27.000              |

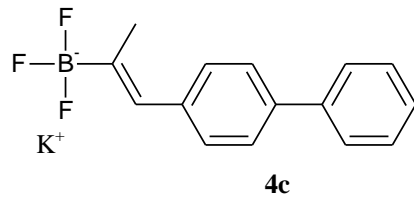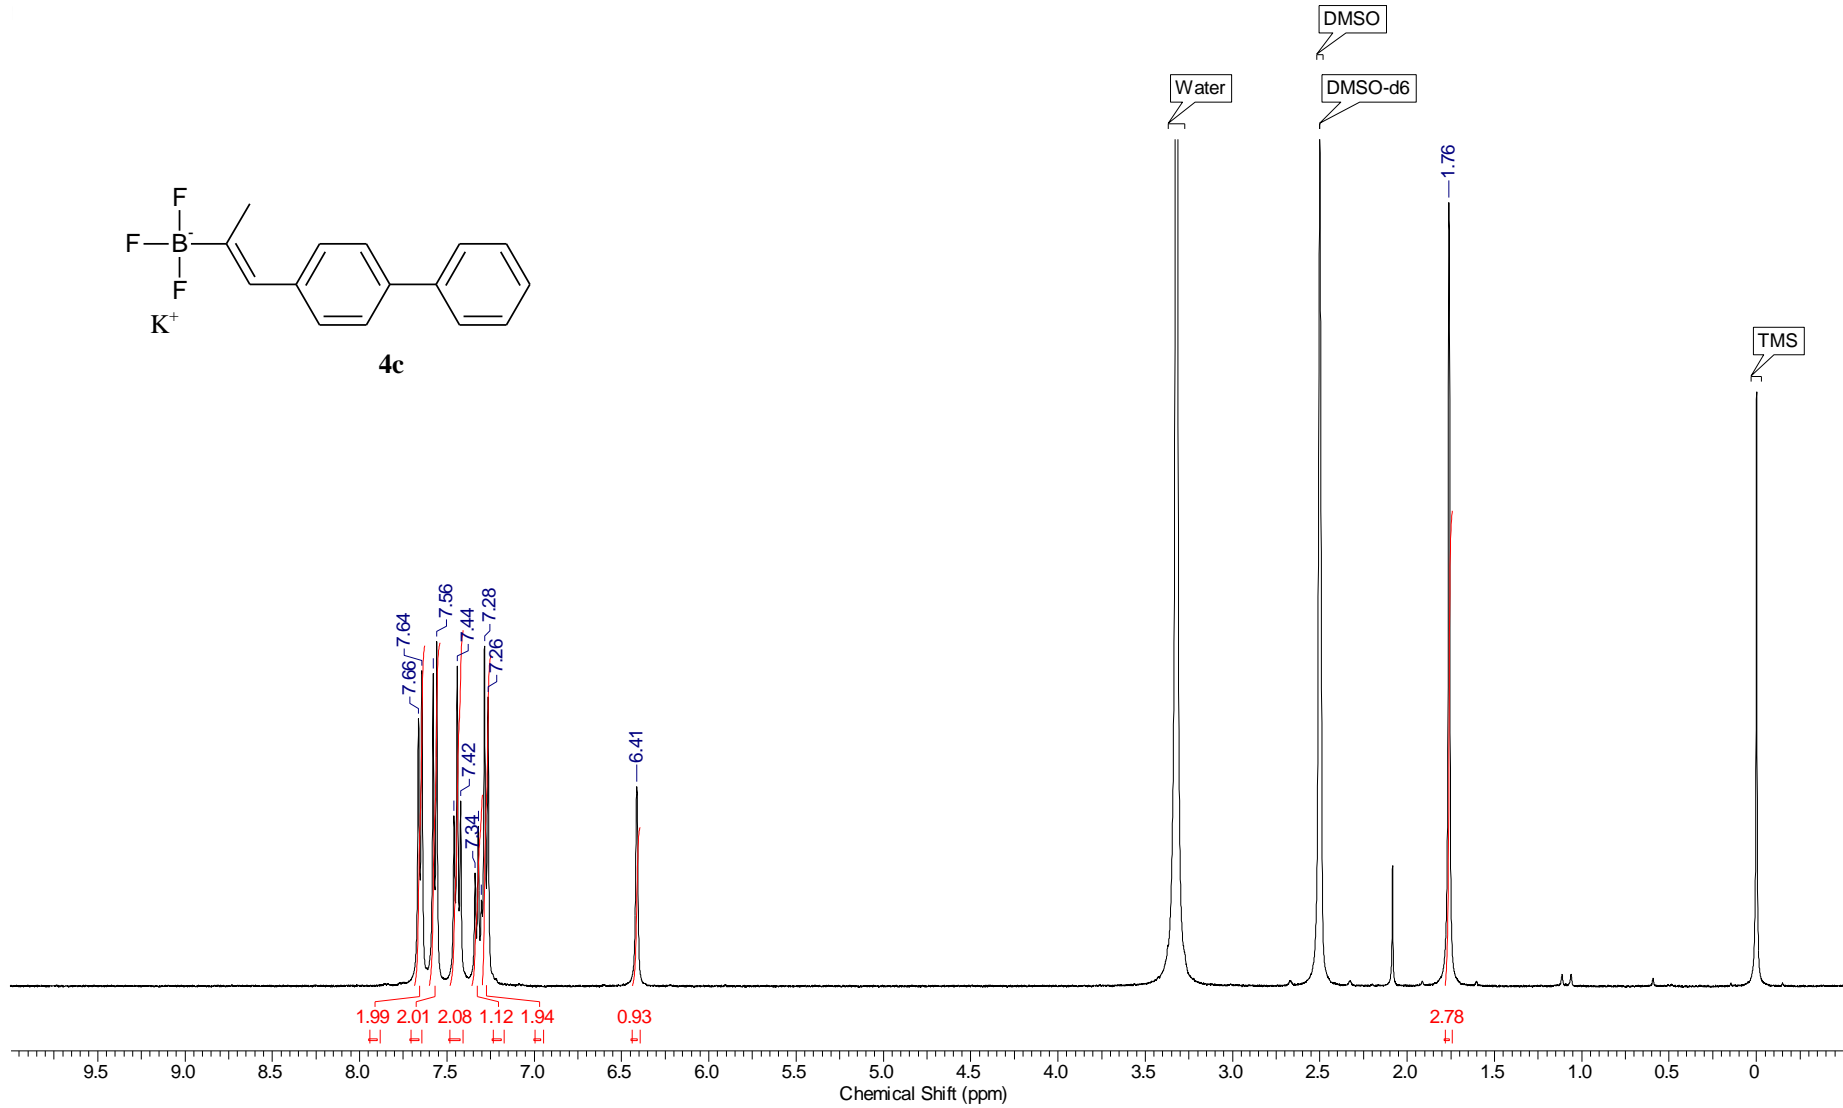

|                       |         |                      |                 |                      |          |                        |                     |
|-----------------------|---------|----------------------|-----------------|----------------------|----------|------------------------|---------------------|
| Frequency (MHz)       | 100.69  | Nucleus              | <sup>13</sup> C | Number of Transients | 1024     | Origin                 | Bruker BioSpin GmbH |
| Original Points Count | 32768   | Owner                | tibbe_operator  | Points Count         | 32768    | SW(cyclical) (Hz)      | 24037.73            |
| Solvent               | DMSO-d6 | Spectrum Offset (Hz) | 10017.4326      | Sweep Width (Hz)     | 24036.99 | Temperature (degree C) | 27.000              |

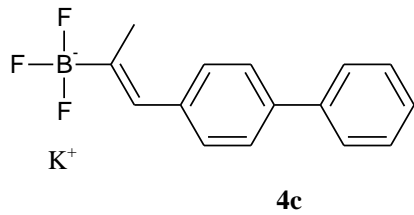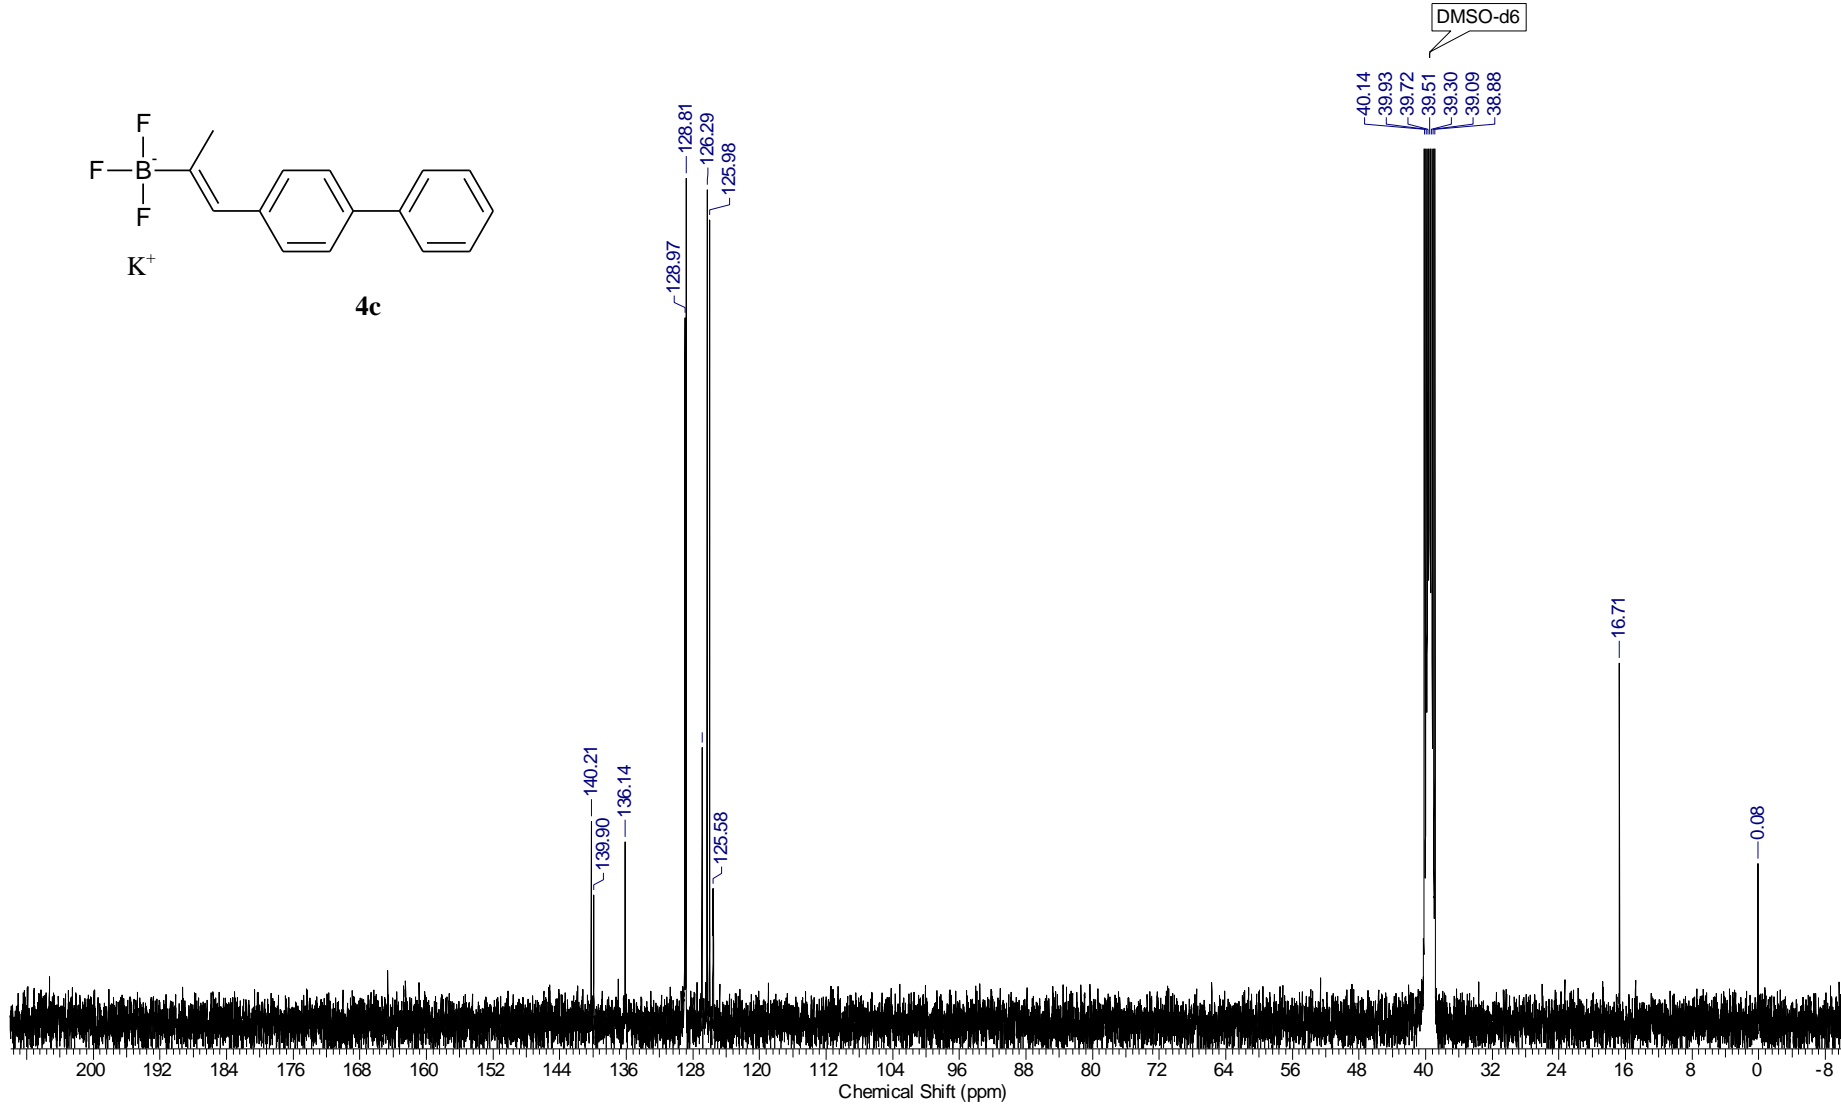

|                              |         |                             |                |                             |          |                               |                     |
|------------------------------|---------|-----------------------------|----------------|-----------------------------|----------|-------------------------------|---------------------|
| <b>Frequency (MHz)</b>       | 128.46  | <b>Nucleus</b>              | 11B            | <b>Number of Transients</b> | 128      | <b>Origin</b>                 | Bruker BioSpin GmbH |
| <b>Original Points Count</b> | 32768   | <b>Owner</b>                | tibbe_operator | <b>Points Count</b>         | 32768    | <b>SW(cyclical) (Hz)</b>      | 25509.43            |
| <b>Solvent</b>               | DMSO-d6 | <b>Spectrum Offset (Hz)</b> | 1.2842         | <b>Sweep Width (Hz)</b>     | 25508.65 | <b>Temperature (degree C)</b> | 27.000              |

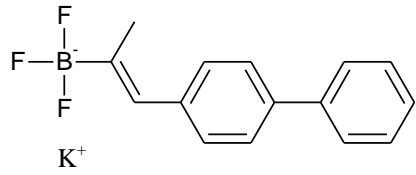

4c

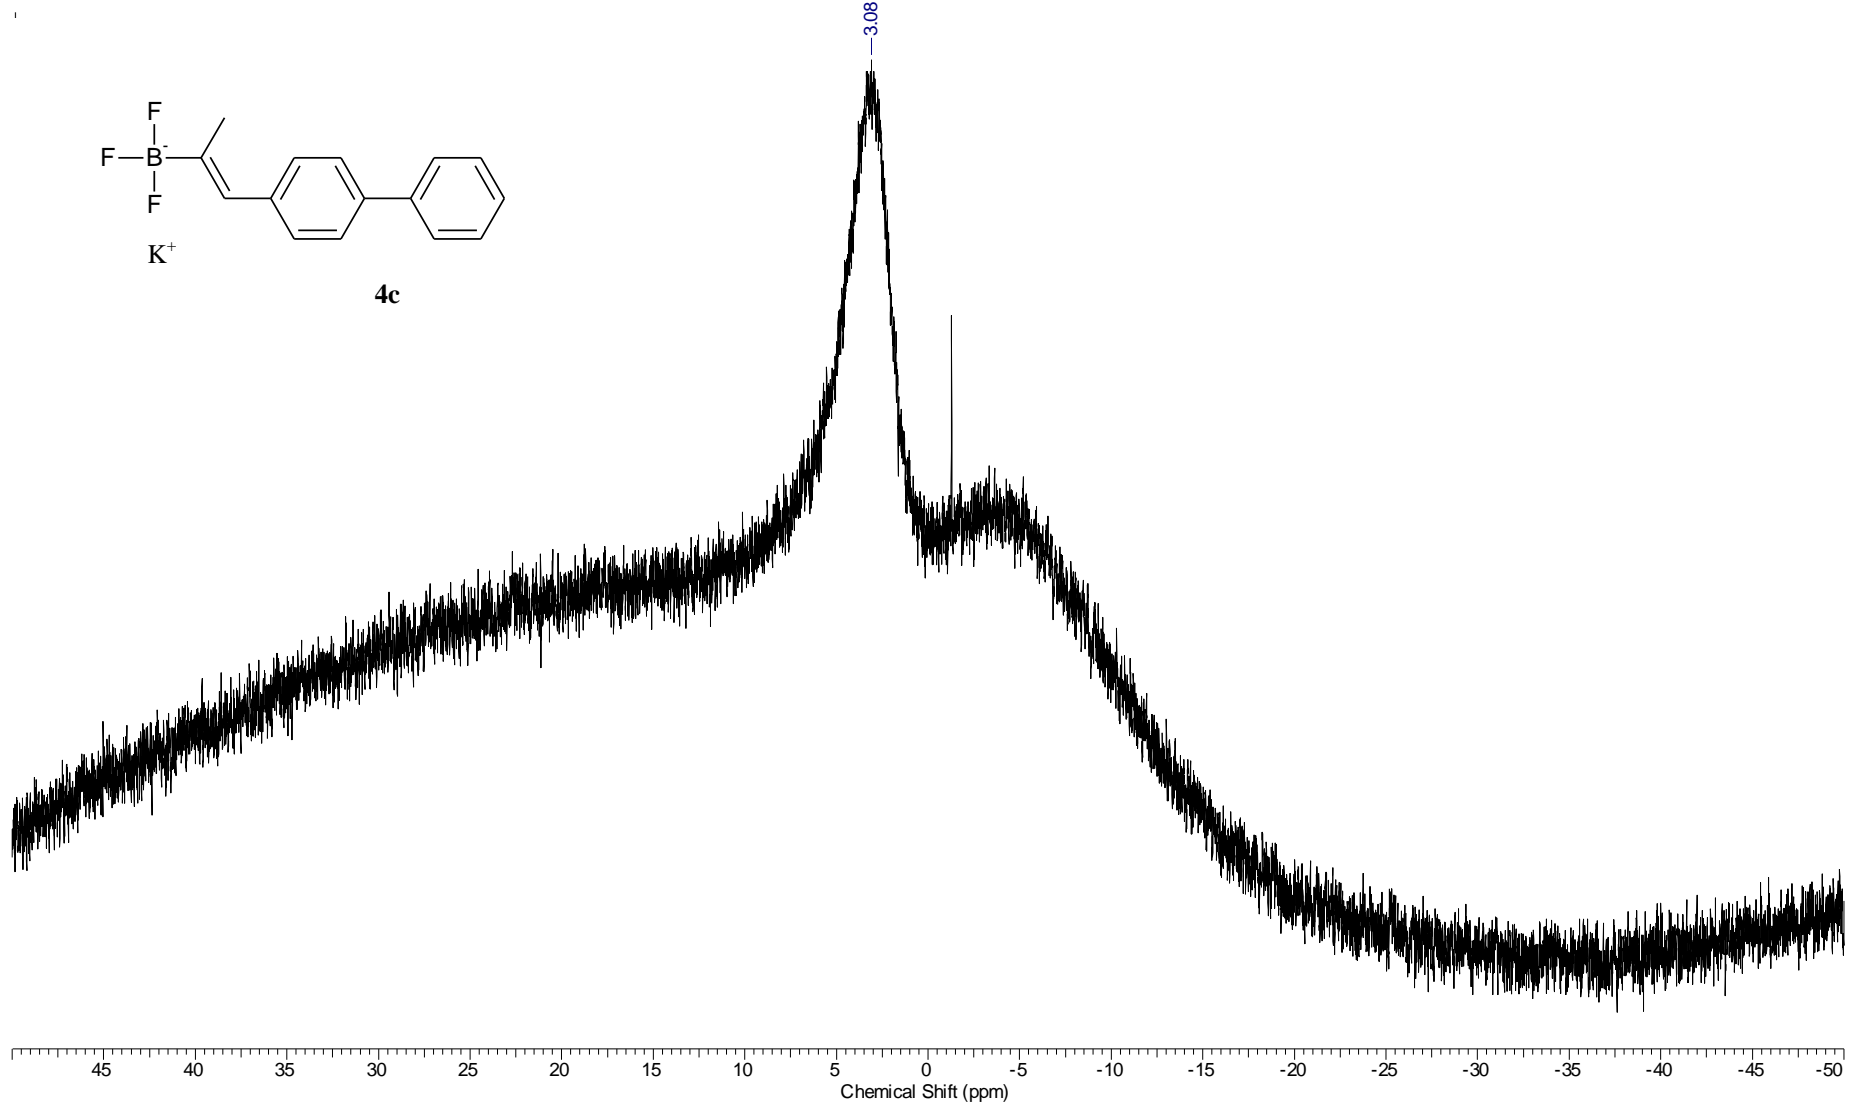



|                       |         |                      |                 |                      |          |                        |                     |
|-----------------------|---------|----------------------|-----------------|----------------------|----------|------------------------|---------------------|
| Frequency (MHz)       | 376.71  | Nucleus              | <sup>19</sup> F | Number of Transients | 64       | Origin                 | Bruker BioSpin GmbH |
| Original Points Count | 131072  | Owner                | tibbe_operator  | Points Count         | 131072   | SW(cyclical) (Hz)      | 93749.28            |
| Solvent               | DMSO-d6 | Spectrum Offset (Hz) | -37674.7617     | Sweep Width (Hz)     | 93748.56 | Temperature (degree C) | 27.000              |

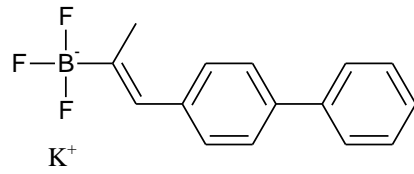

4c

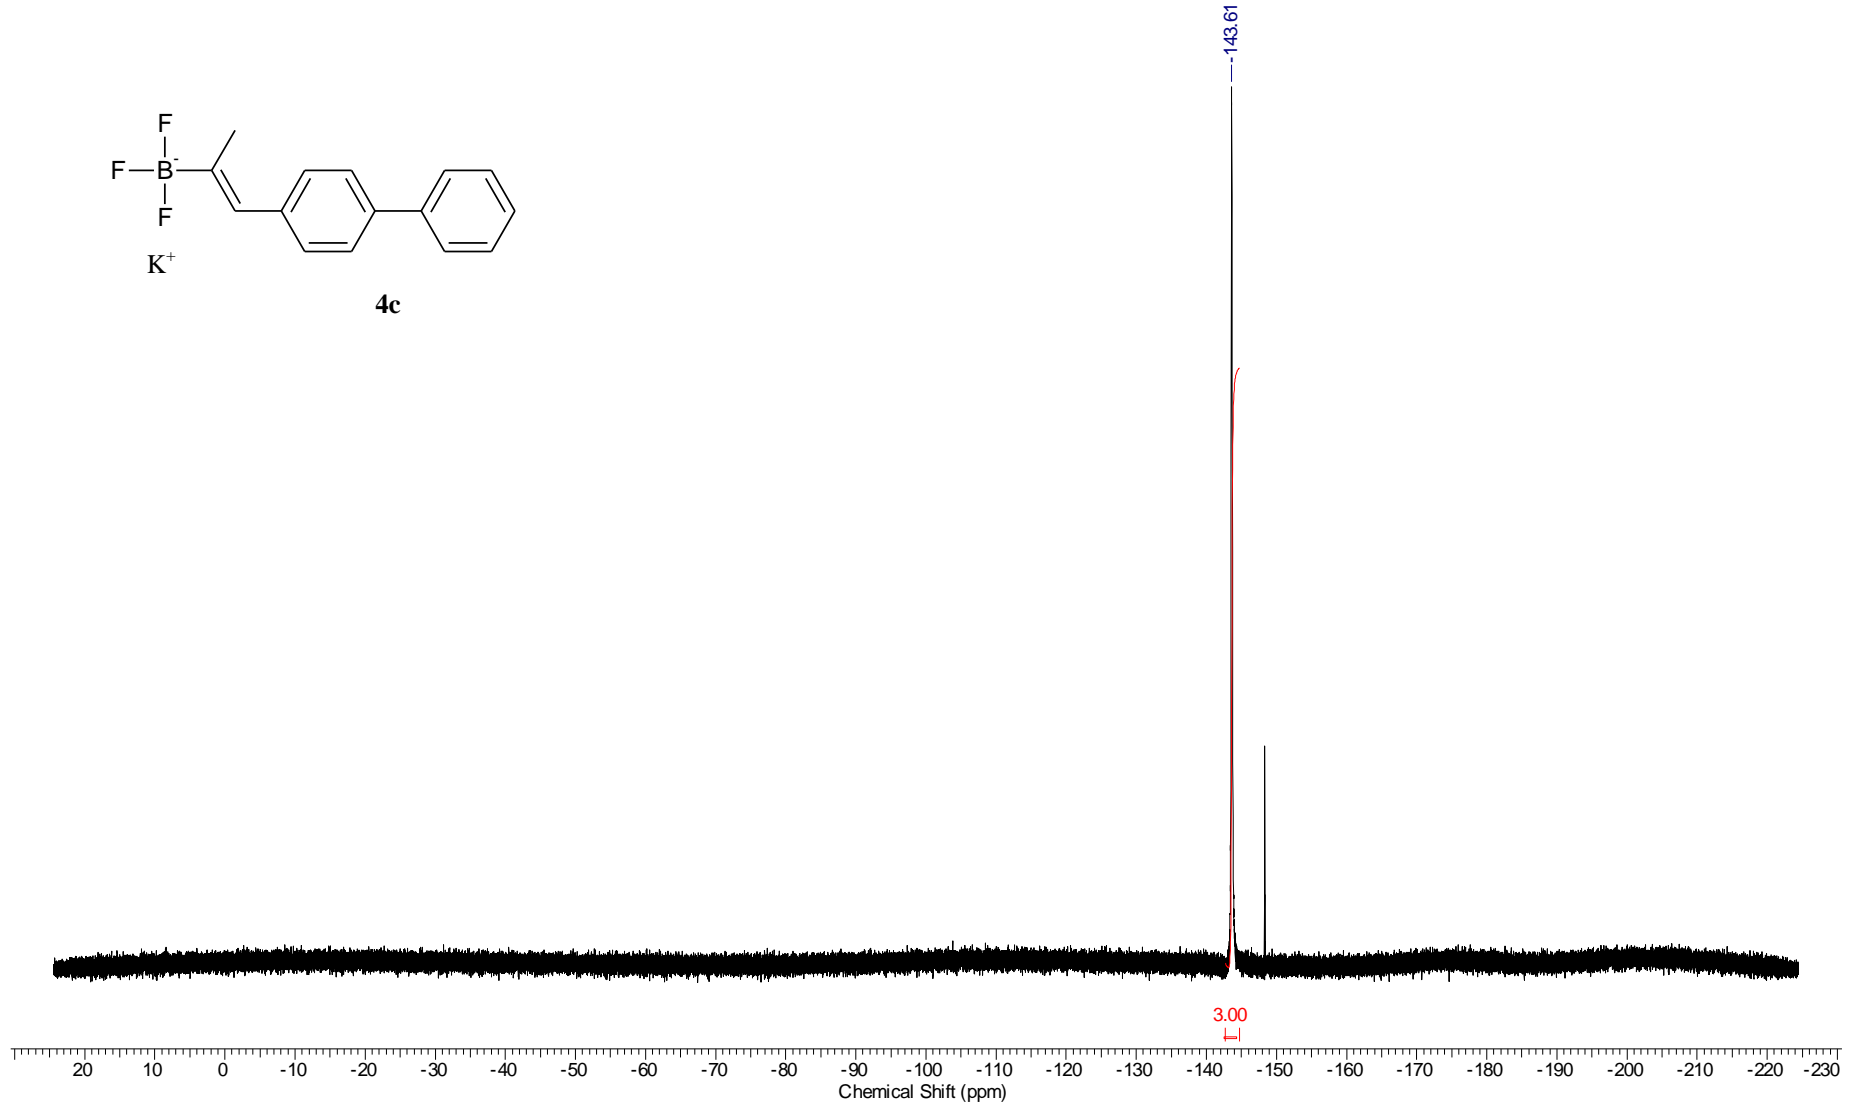

|                       |         |                      |                |                      |         |                        |                     |
|-----------------------|---------|----------------------|----------------|----------------------|---------|------------------------|---------------------|
| Frequency (MHz)       | 400.40  | Nucleus              | <sup>1</sup> H | Number of Transients | 16      | Origin                 | Bruker BioSpin GmbH |
| Original Points Count | 32768   | Owner                | tibbe_operator | Points Count         | 32768   | SW(cyclical) (Hz)      | 7211.32             |
| Solvent               | DMSO-d6 | Spectrum Offset (Hz) | 3398.3625      | Sweep Width (Hz)     | 7211.10 | Temperature (degree C) | 27.000              |

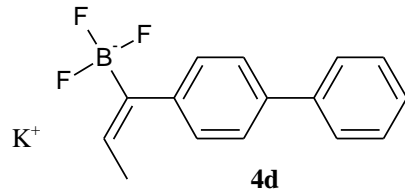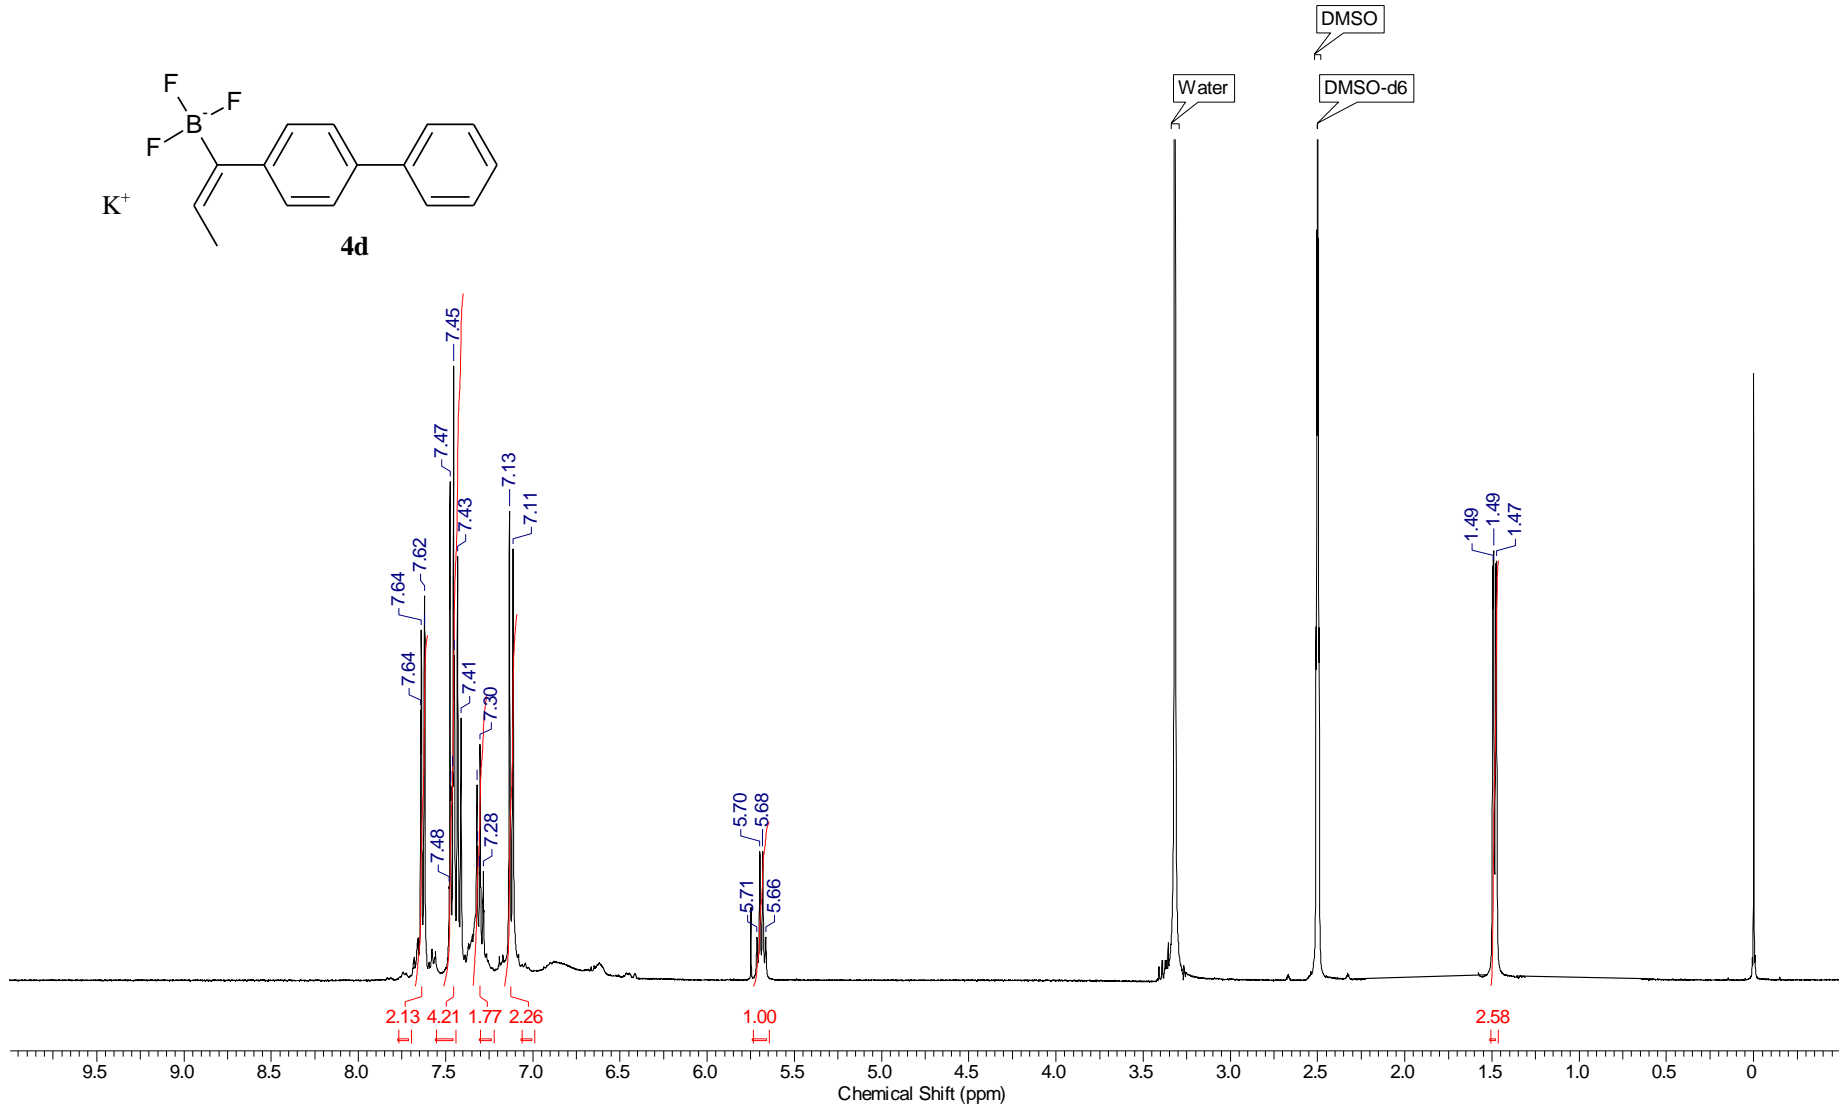

|                              |         |                             |                 |                             |          |                               |                     |
|------------------------------|---------|-----------------------------|-----------------|-----------------------------|----------|-------------------------------|---------------------|
| <b>Frequency (MHz)</b>       | 100.69  | <b>Nucleus</b>              | <sup>13</sup> C | <b>Number of Transients</b> | 1024     | <b>Origin</b>                 | Bruker BioSpin GmbH |
| <b>Original Points Count</b> | 32768   | <b>Owner</b>                | tibbe_operator  | <b>Points Count</b>         | 32768    | <b>SW(cyclical) (Hz)</b>      | 24037.73            |
| <b>Solvent</b>               | DMSO-d6 | <b>Spectrum Offset (Hz)</b> | 10016.6982      | <b>Sweep Width (Hz)</b>     | 24036.99 | <b>Temperature (degree C)</b> | 27.000              |

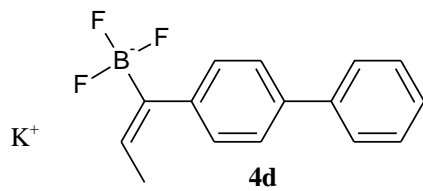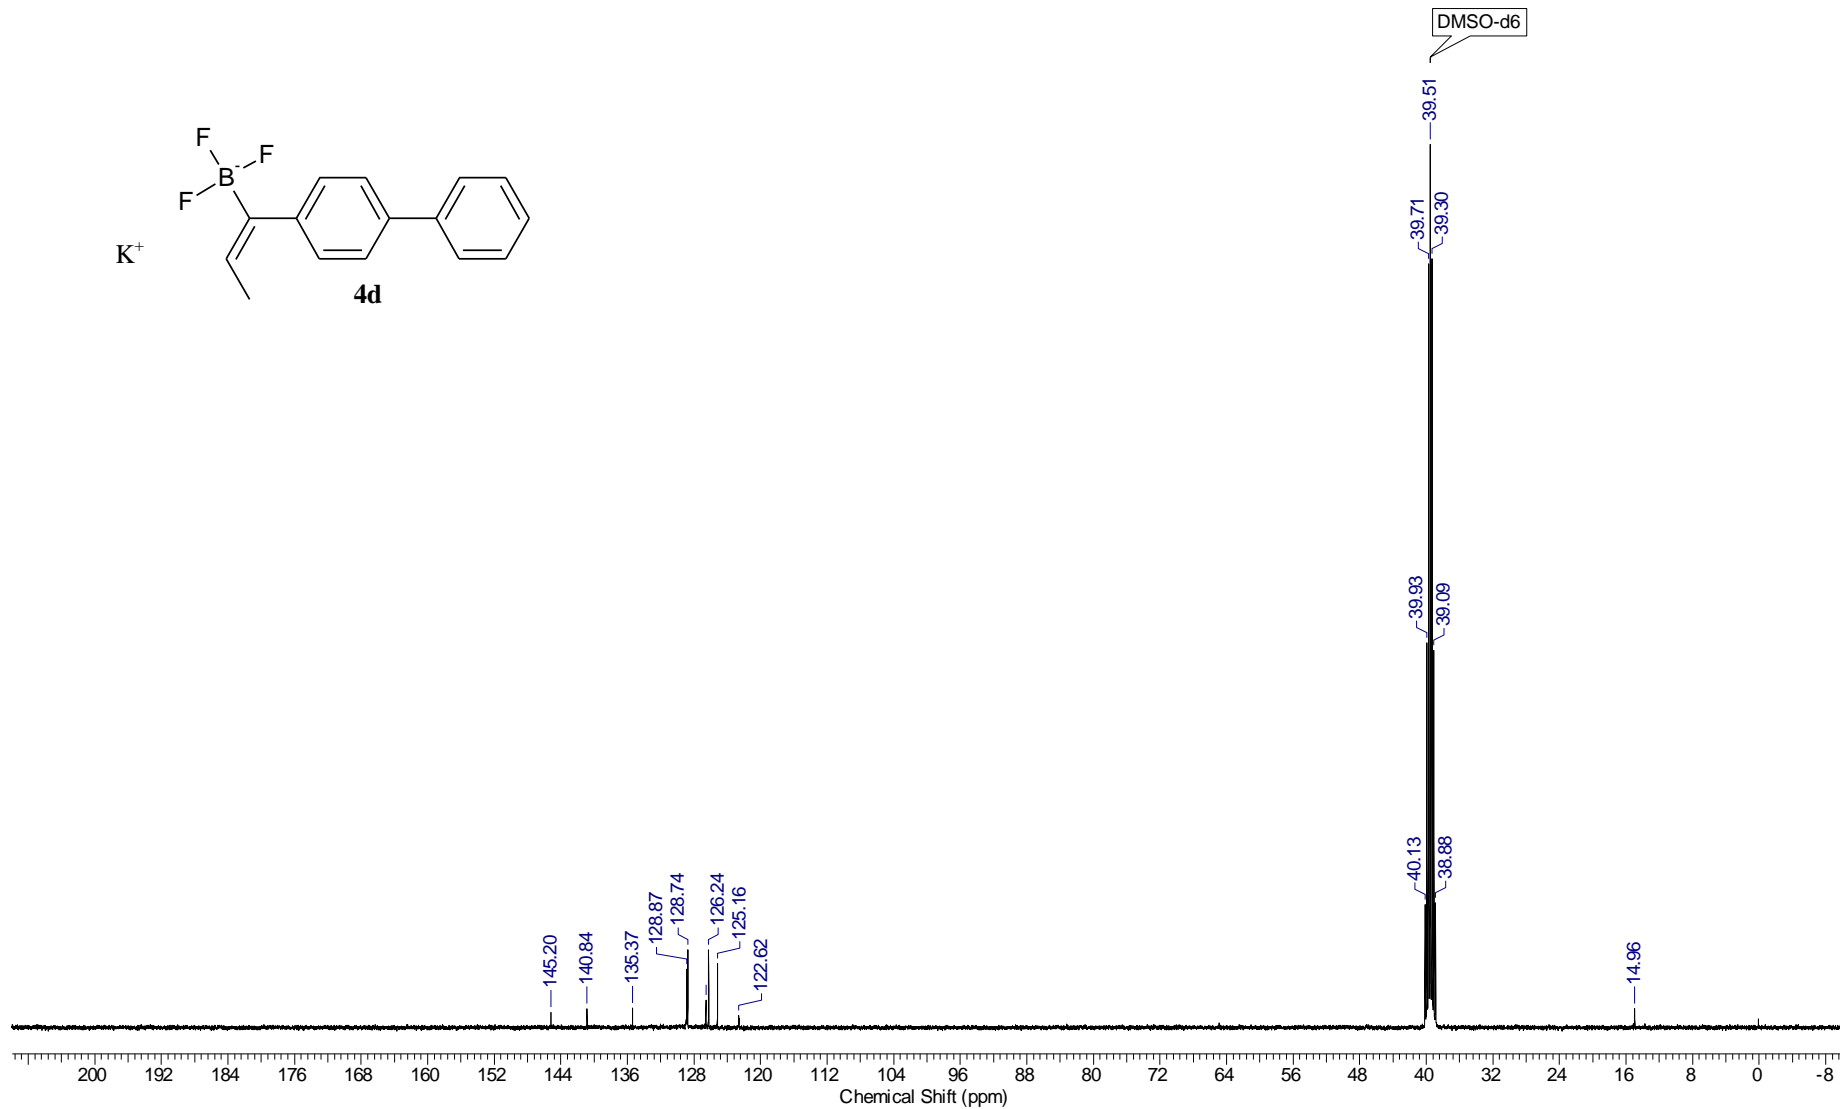

|                       |         |                      |                |                      |          |                        |                     |
|-----------------------|---------|----------------------|----------------|----------------------|----------|------------------------|---------------------|
| Frequency (MHz)       | 128.46  | Nucleus              | 11B            | Number of Transients | 128      | Origin                 | Bruker BioSpin GmbH |
| Original Points Count | 32768   | Owner                | tibbe_operator | Points Count         | 32768    | SW(cyclical) (Hz)      | 25509.43            |
| Solvent               | DMSO-d6 | Spectrum Offset (Hz) | 1.2842         | Sweep Width (Hz)     | 25508.65 | Temperature (degree C) | 27.000              |

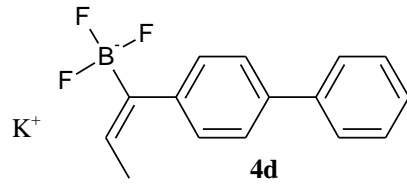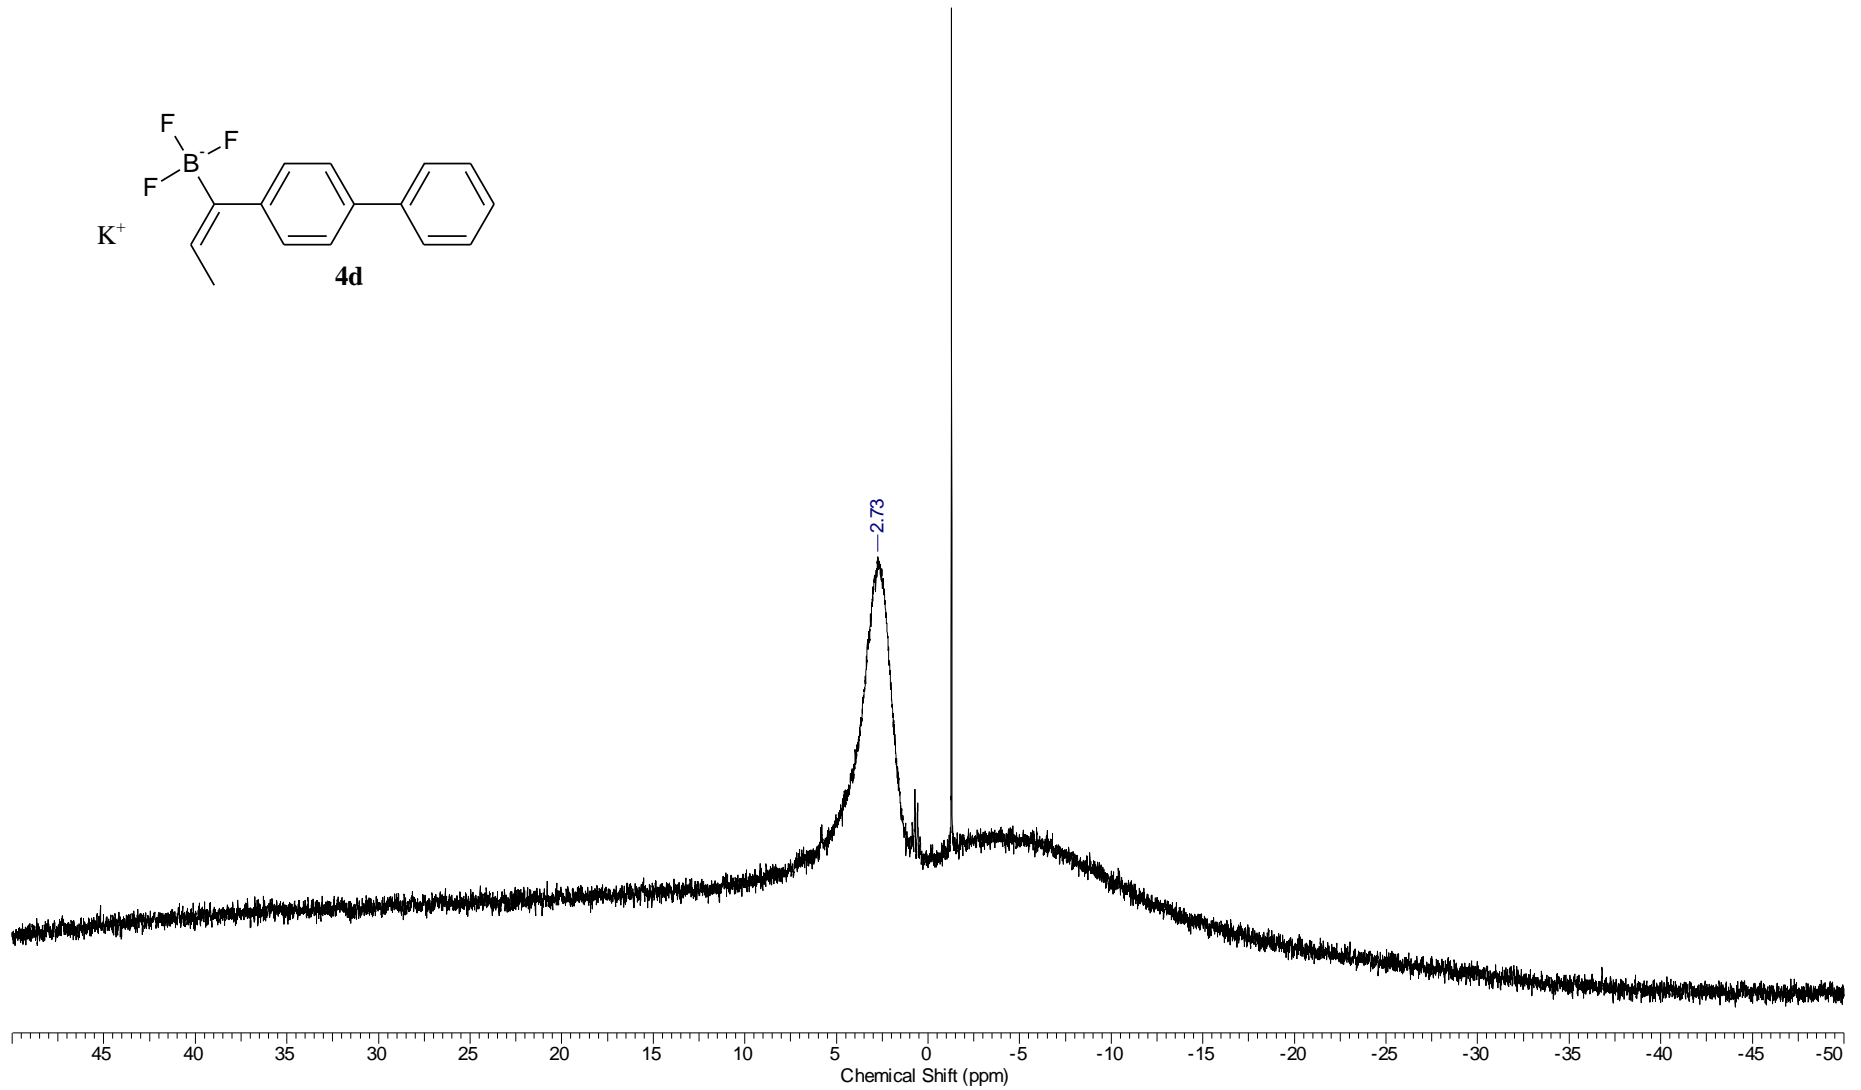

|                       |         |                      |                 |                      |          |                        |                     |
|-----------------------|---------|----------------------|-----------------|----------------------|----------|------------------------|---------------------|
| Frequency (MHz)       | 376.71  | Nucleus              | <sup>19</sup> F | Number of Transients | 64       | Origin                 | Bruker BioSpin GmbH |
| Original Points Count | 131072  | Owner                | tibbe_operator  | Points Count         | 131072   | SW(cyclical) (Hz)      | 93749.28            |
| Solvent               | DMSO-d6 | Spectrum Offset (Hz) | -37674.7617     | Sweep Width (Hz)     | 93748.56 | Temperature (degree C) | 27.000              |

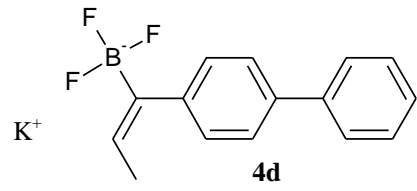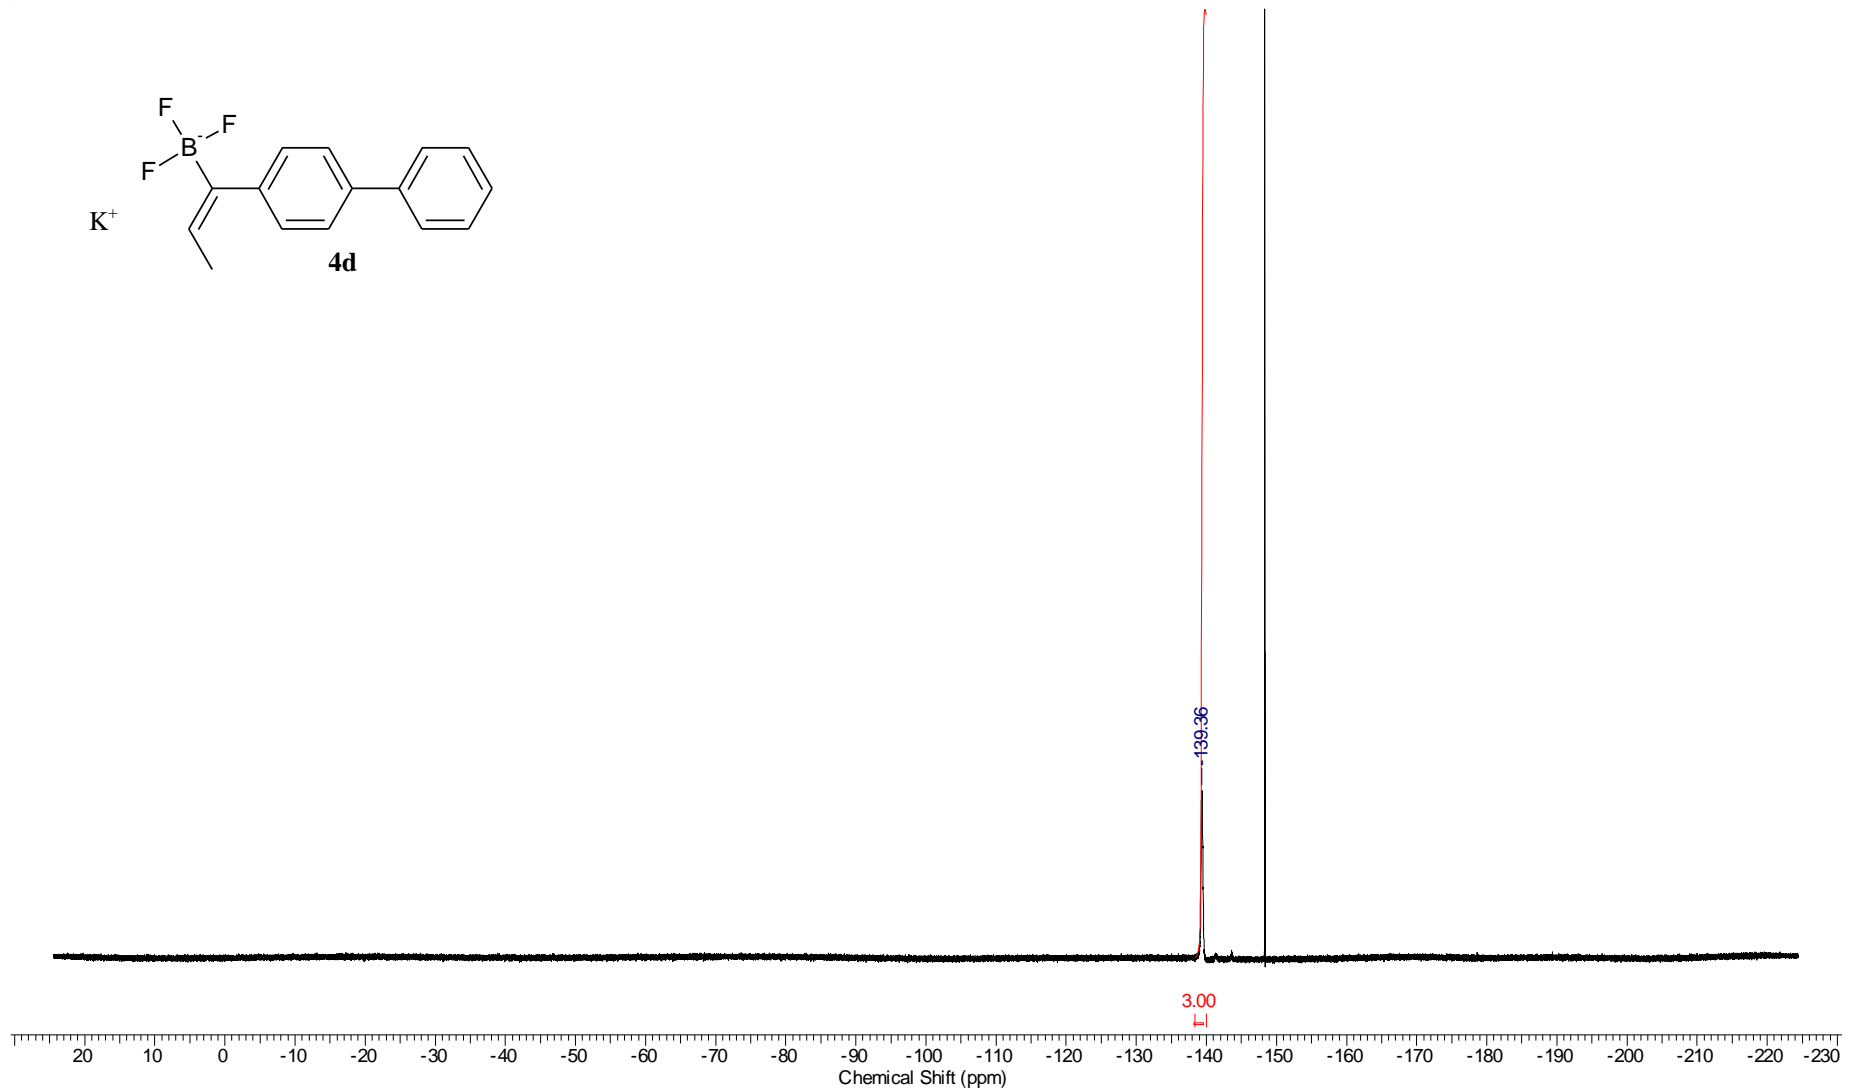

|                       |         |                      |                |                      |         |                        |                     |
|-----------------------|---------|----------------------|----------------|----------------------|---------|------------------------|---------------------|
| Frequency (MHz)       | 400.40  | Nucleus              | <sup>1</sup> H | Number of Transients | 16      | Origin                 | Bruker BioSpin GmbH |
| Original Points Count | 32768   | Owner                | tibbe_operator | Points Count         | 32768   | SW(cyclical) (Hz)      | 7211.32             |
| Solvent               | Acetone | Spectrum Offset (Hz) | 3394.2385      | Sweep Width (Hz)     | 7211.10 | Temperature (degree C) | 27.000              |

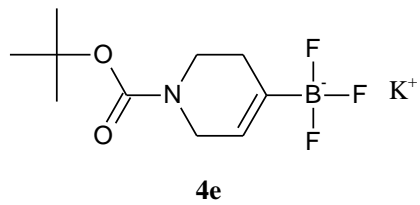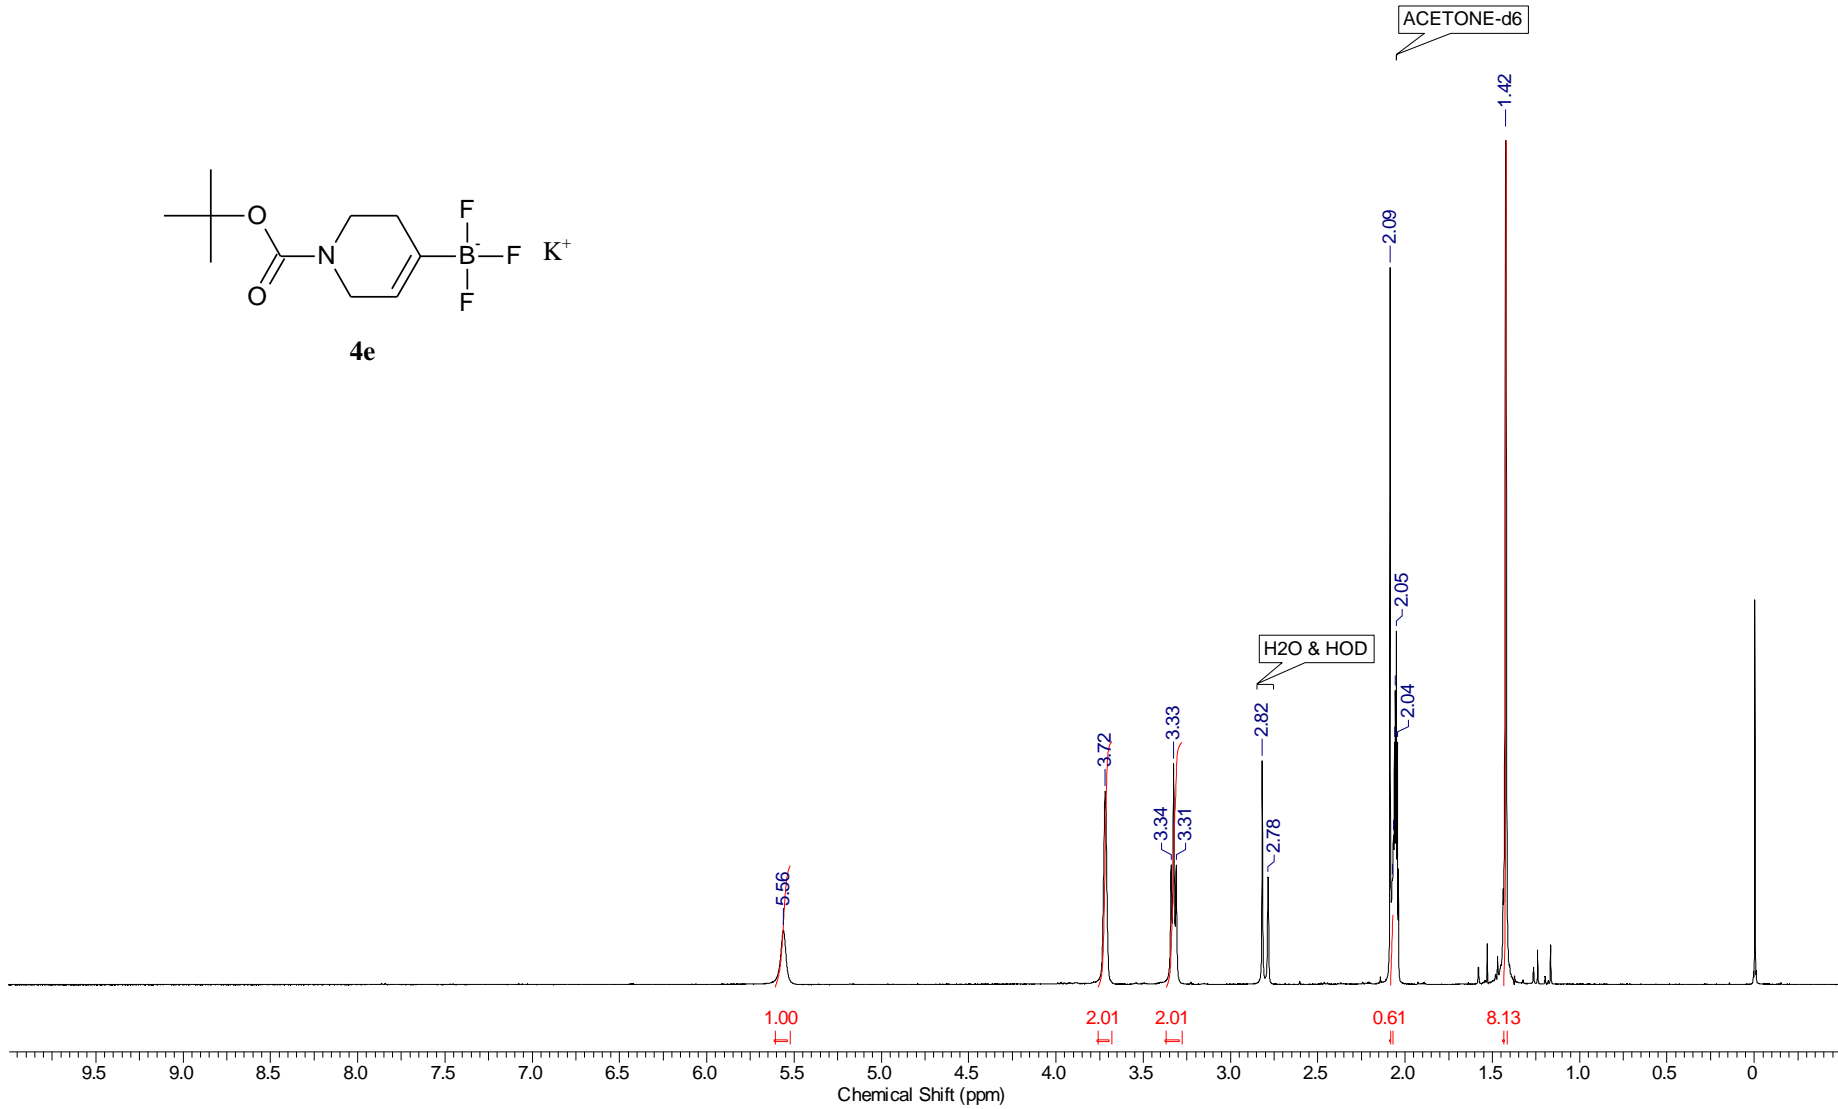

|                              |         |                             |                 |                             |          |                               |                     |
|------------------------------|---------|-----------------------------|-----------------|-----------------------------|----------|-------------------------------|---------------------|
| <b>Frequency (MHz)</b>       | 100.69  | <b>Nucleus</b>              | <sup>13</sup> C | <b>Number of Transients</b> | 1024     | <b>Origin</b>                 | Bruker BioSpin GmbH |
| <b>Original Points Count</b> | 32768   | <b>Owner</b>                | tibbe_operator  | <b>Points Count</b>         | 32768    | <b>SW(cyclical) (Hz)</b>      | 24037.73            |
| <b>Solvent</b>               | Acetone | <b>Spectrum Offset (Hz)</b> | 10166.8398      | <b>Sweep Width (Hz)</b>     | 24036.99 | <b>Temperature (degree C)</b> | 27.000              |

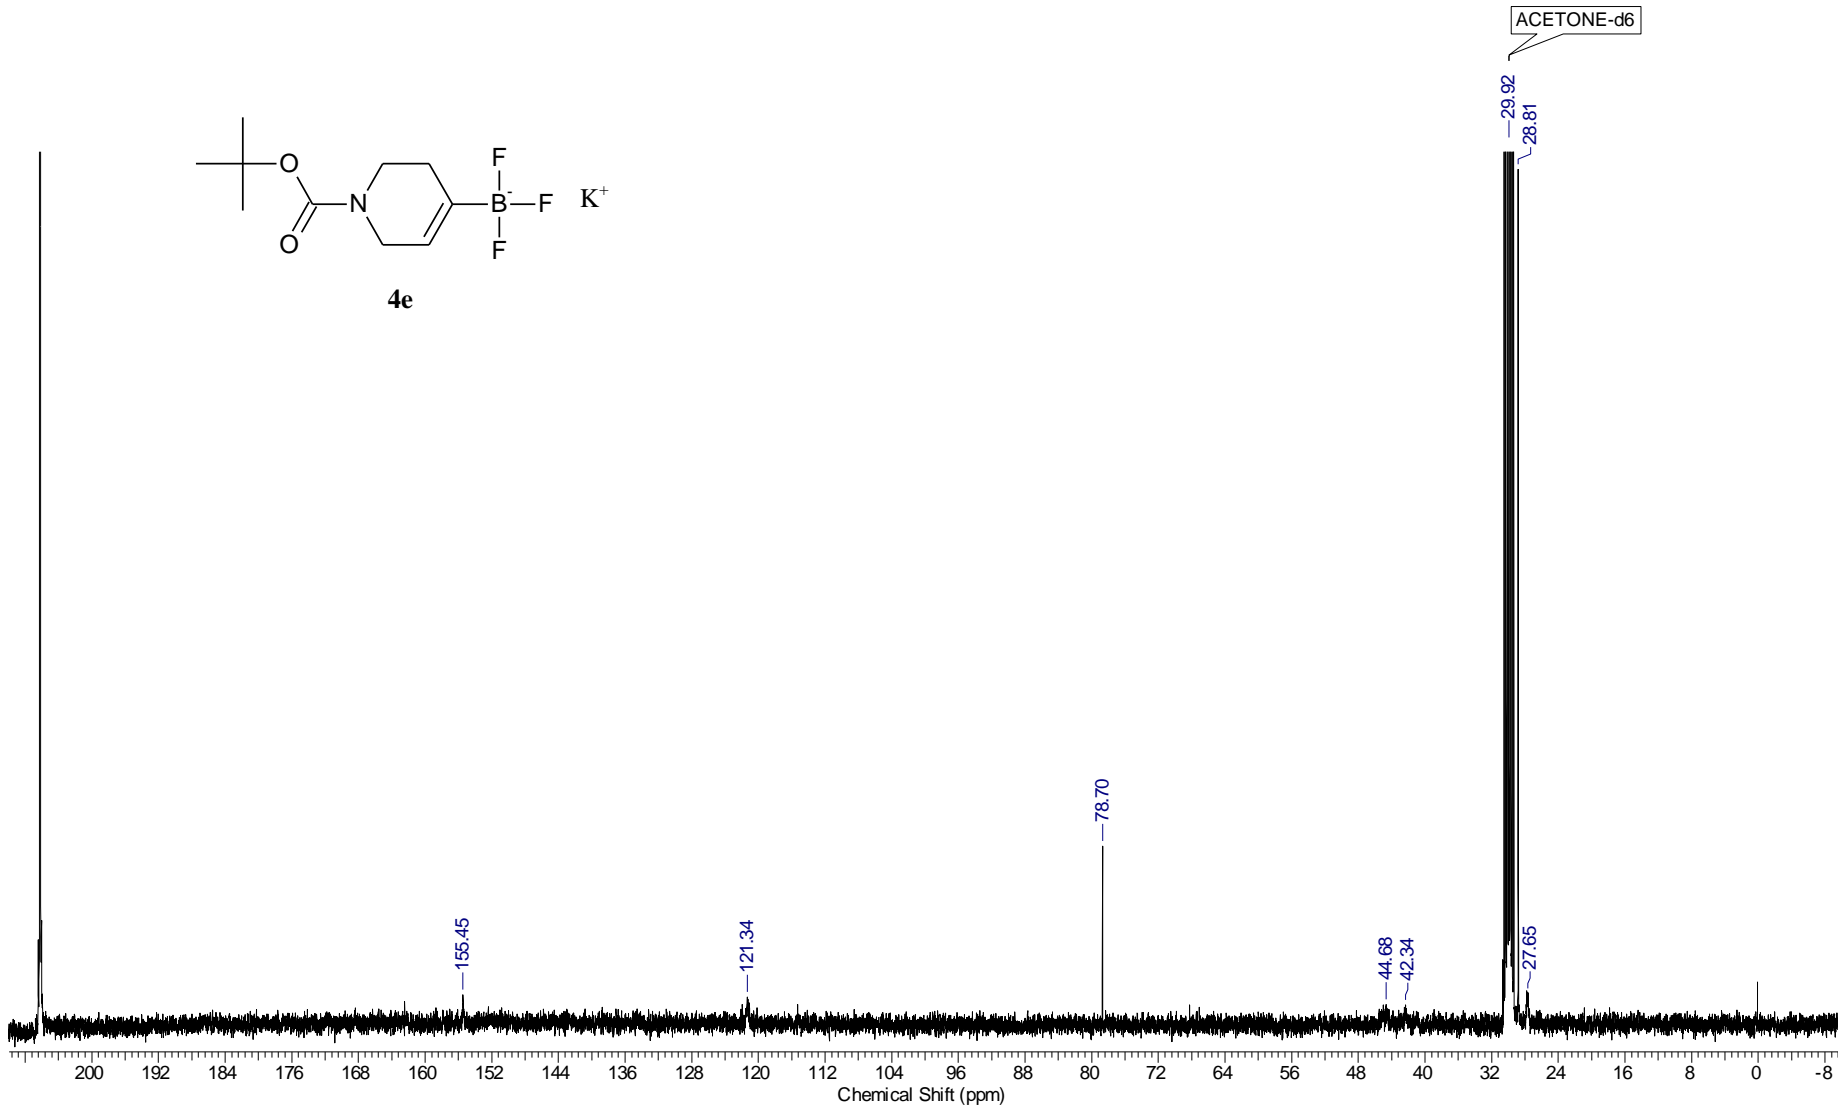

|                              |         |                             |                |                             |          |                               |                     |
|------------------------------|---------|-----------------------------|----------------|-----------------------------|----------|-------------------------------|---------------------|
| <b>Frequency (MHz)</b>       | 128.46  | <b>Nucleus</b>              | 11B            | <b>Number of Transients</b> | 128      | <b>Origin</b>                 | Bruker BioSpin GmbH |
| <b>Original Points Count</b> | 32768   | <b>Owner</b>                | tibbe_operator | <b>Points Count</b>         | 32768    | <b>SW(cyclical) (Hz)</b>      | 25509.43            |
| <b>Solvent</b>               | Acetone | <b>Spectrum Offset (Hz)</b> | 1.2842         | <b>Sweep Width (Hz)</b>     | 25508.65 | <b>Temperature (degree C)</b> | 27.000              |

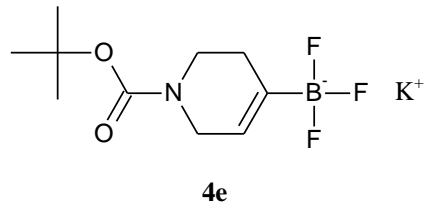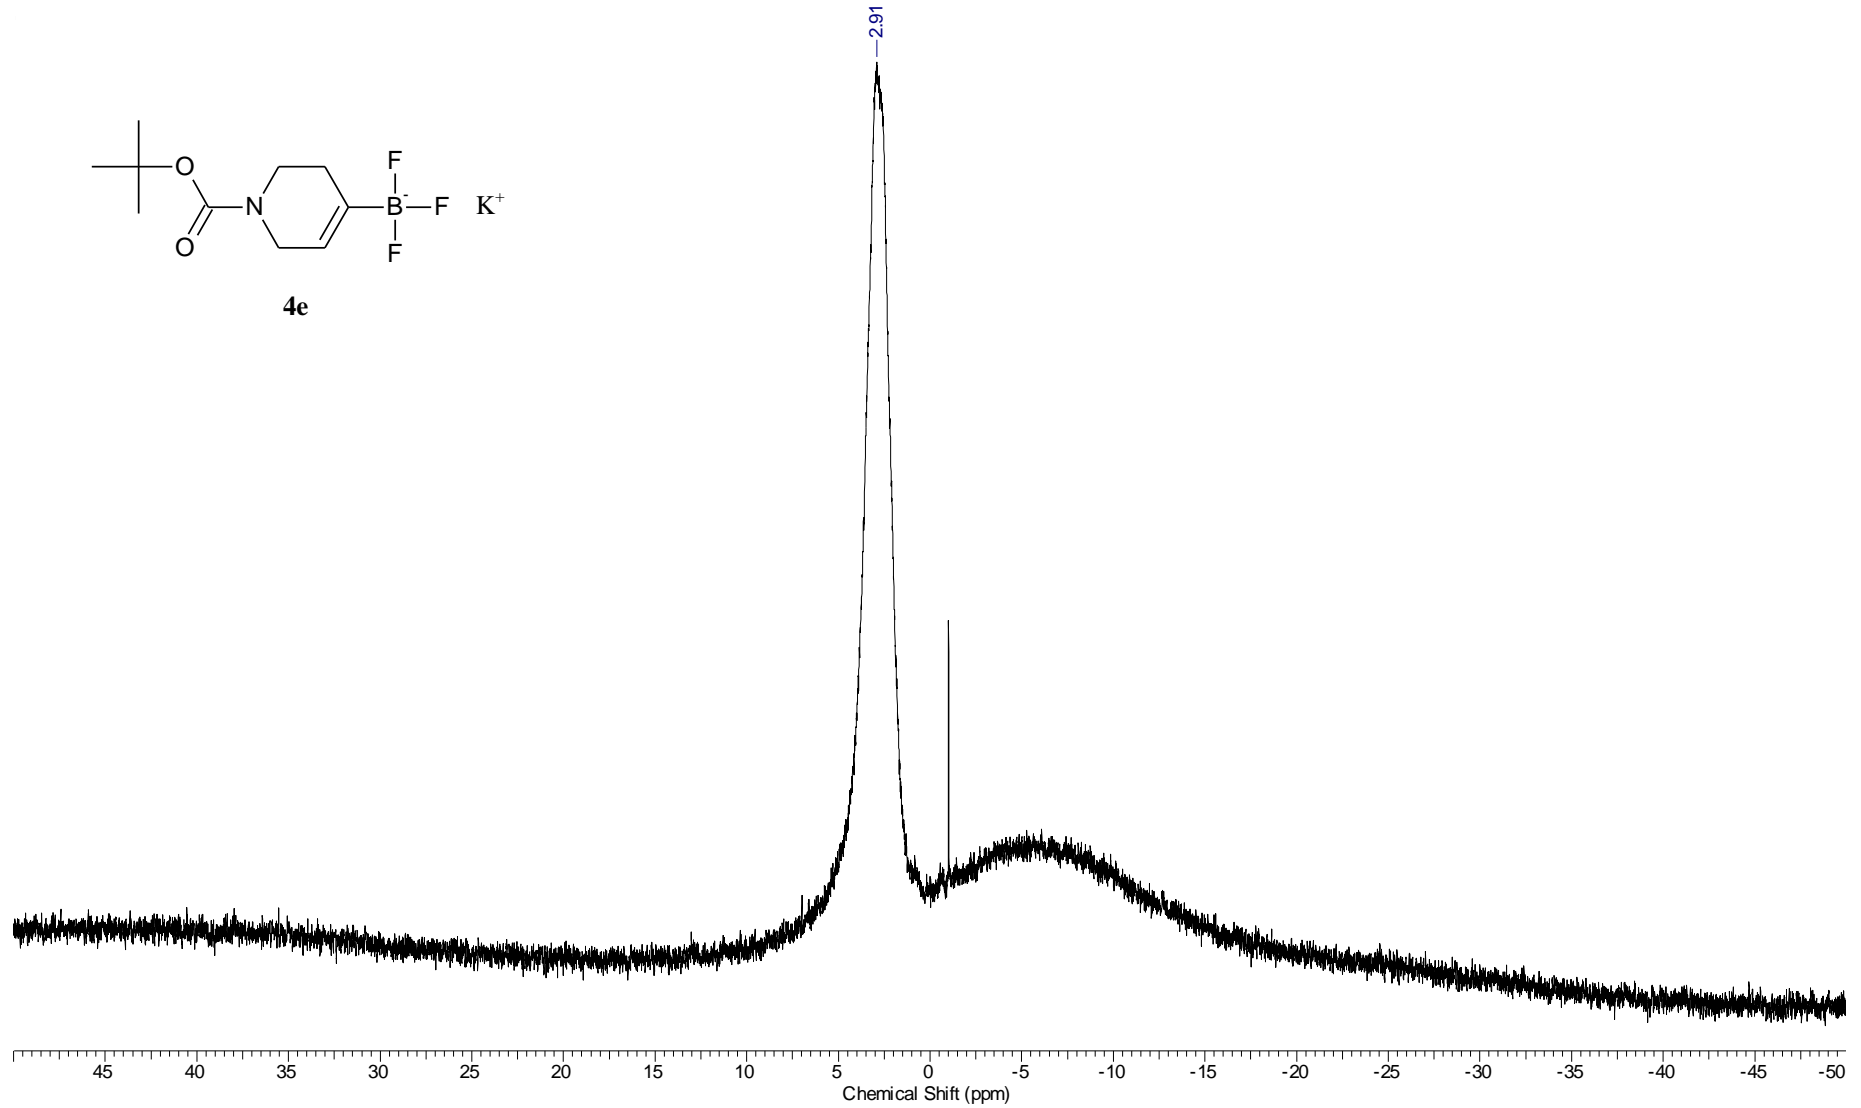



|                              |         |                             |                |                             |          |                               |                     |
|------------------------------|---------|-----------------------------|----------------|-----------------------------|----------|-------------------------------|---------------------|
| <b>Frequency (MHz)</b>       | 376.71  | <b>Nucleus</b>              | 19F            | <b>Number of Transients</b> | 64       | <b>Origin</b>                 | Bruker BioSpin GmbH |
| <b>Original Points Count</b> | 131072  | <b>Owner</b>                | tibbe_operator | <b>Points Count</b>         | 131072   | <b>SW(cyclical) (Hz)</b>      | 93749.28            |
| <b>Solvent</b>               | Acetone | <b>Spectrum Offset (Hz)</b> | -37674.7617    | <b>Sweep Width (Hz)</b>     | 93748.56 | <b>Temperature (degree C)</b> | 27.000              |

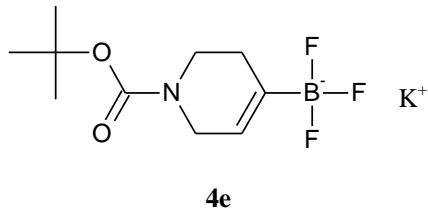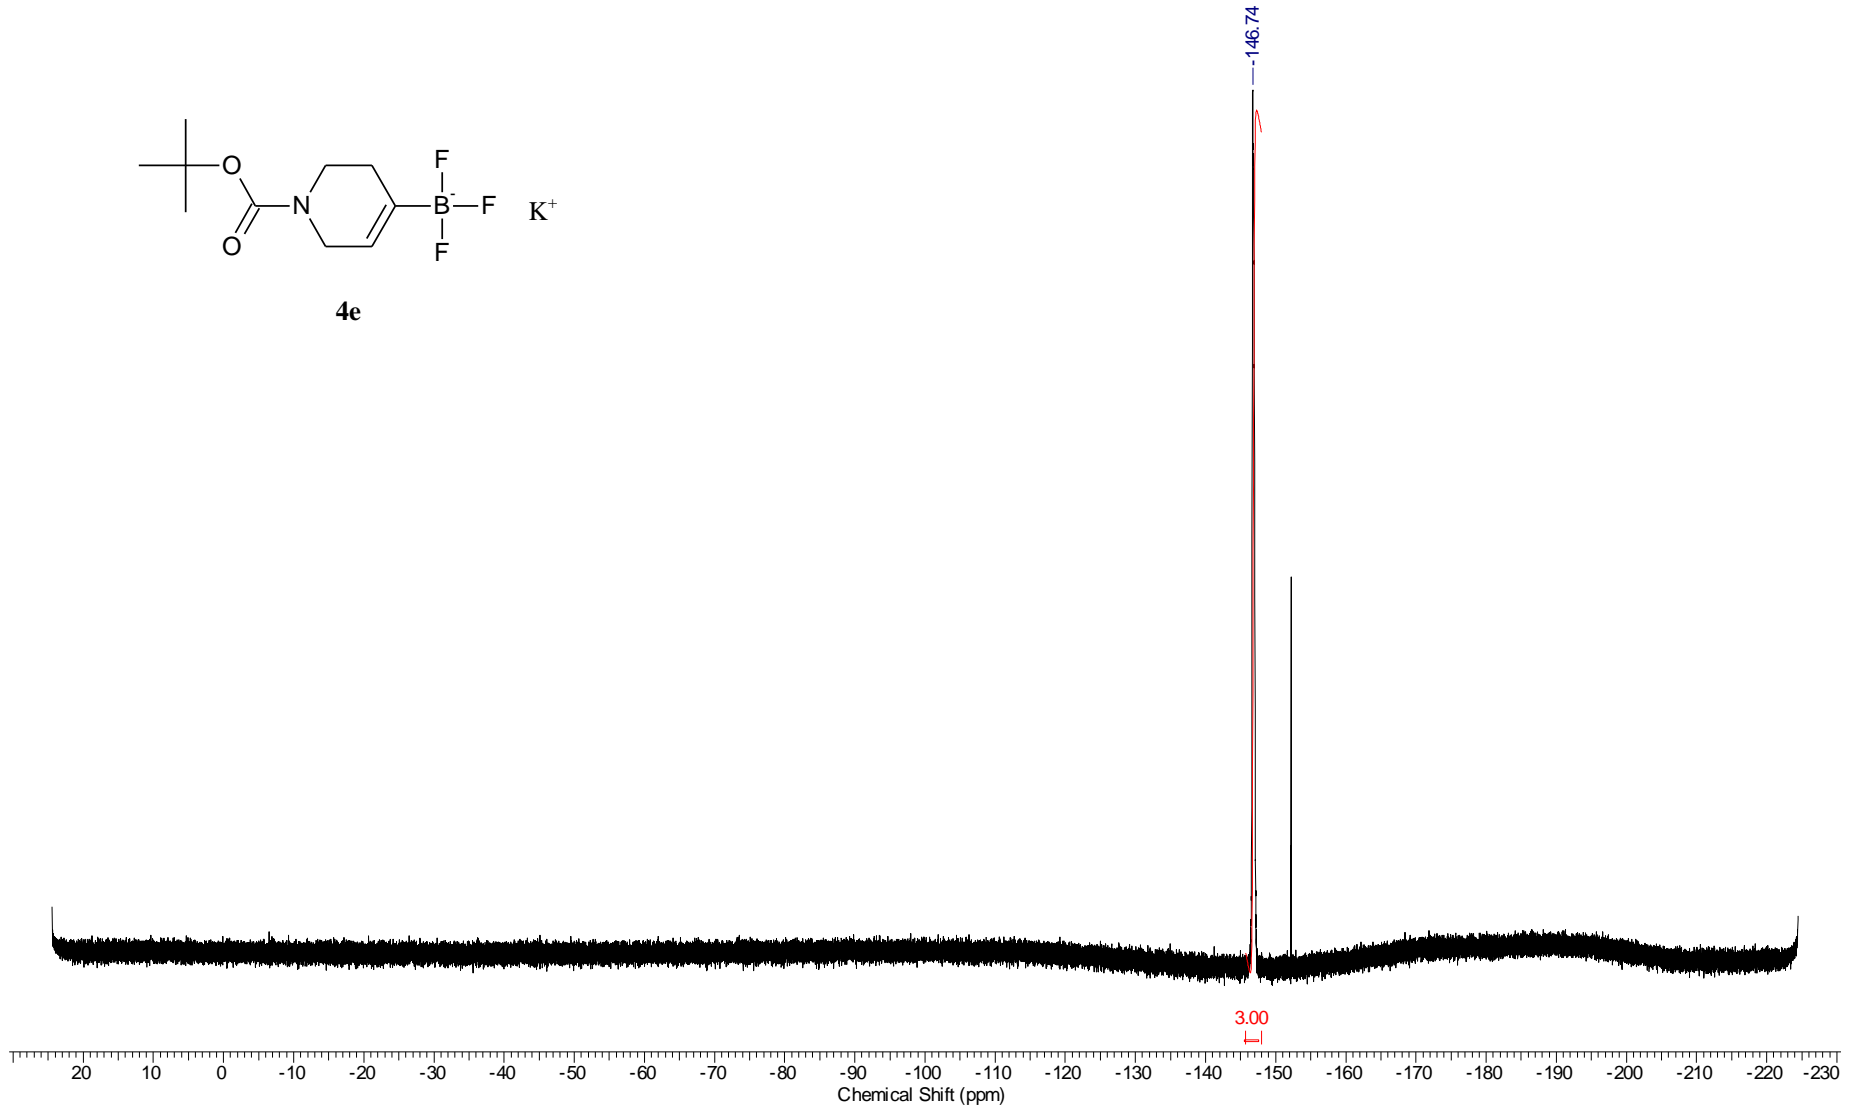

|                       |              |                      |                 |                      |          |                        |                     |
|-----------------------|--------------|----------------------|-----------------|----------------------|----------|------------------------|---------------------|
| Frequency (MHz)       | 376.71       | Nucleus              | <sup>19</sup> F | Number of Transients | 64       | Origin                 | Bruker BioSpin GmbH |
| Original Points Count | 131072       | Owner                | tibbe_operator  | Points Count         | 131072   | SW(cyclical) (Hz)      | 89285.03            |
| Solvent               | CHLOROFORM-d | Spectrum Offset (Hz) | -37658.4492     | Sweep Width (Hz)     | 89284.35 | Temperature (degree C) | 27.000              |

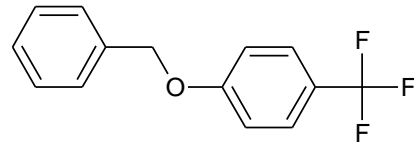

2a

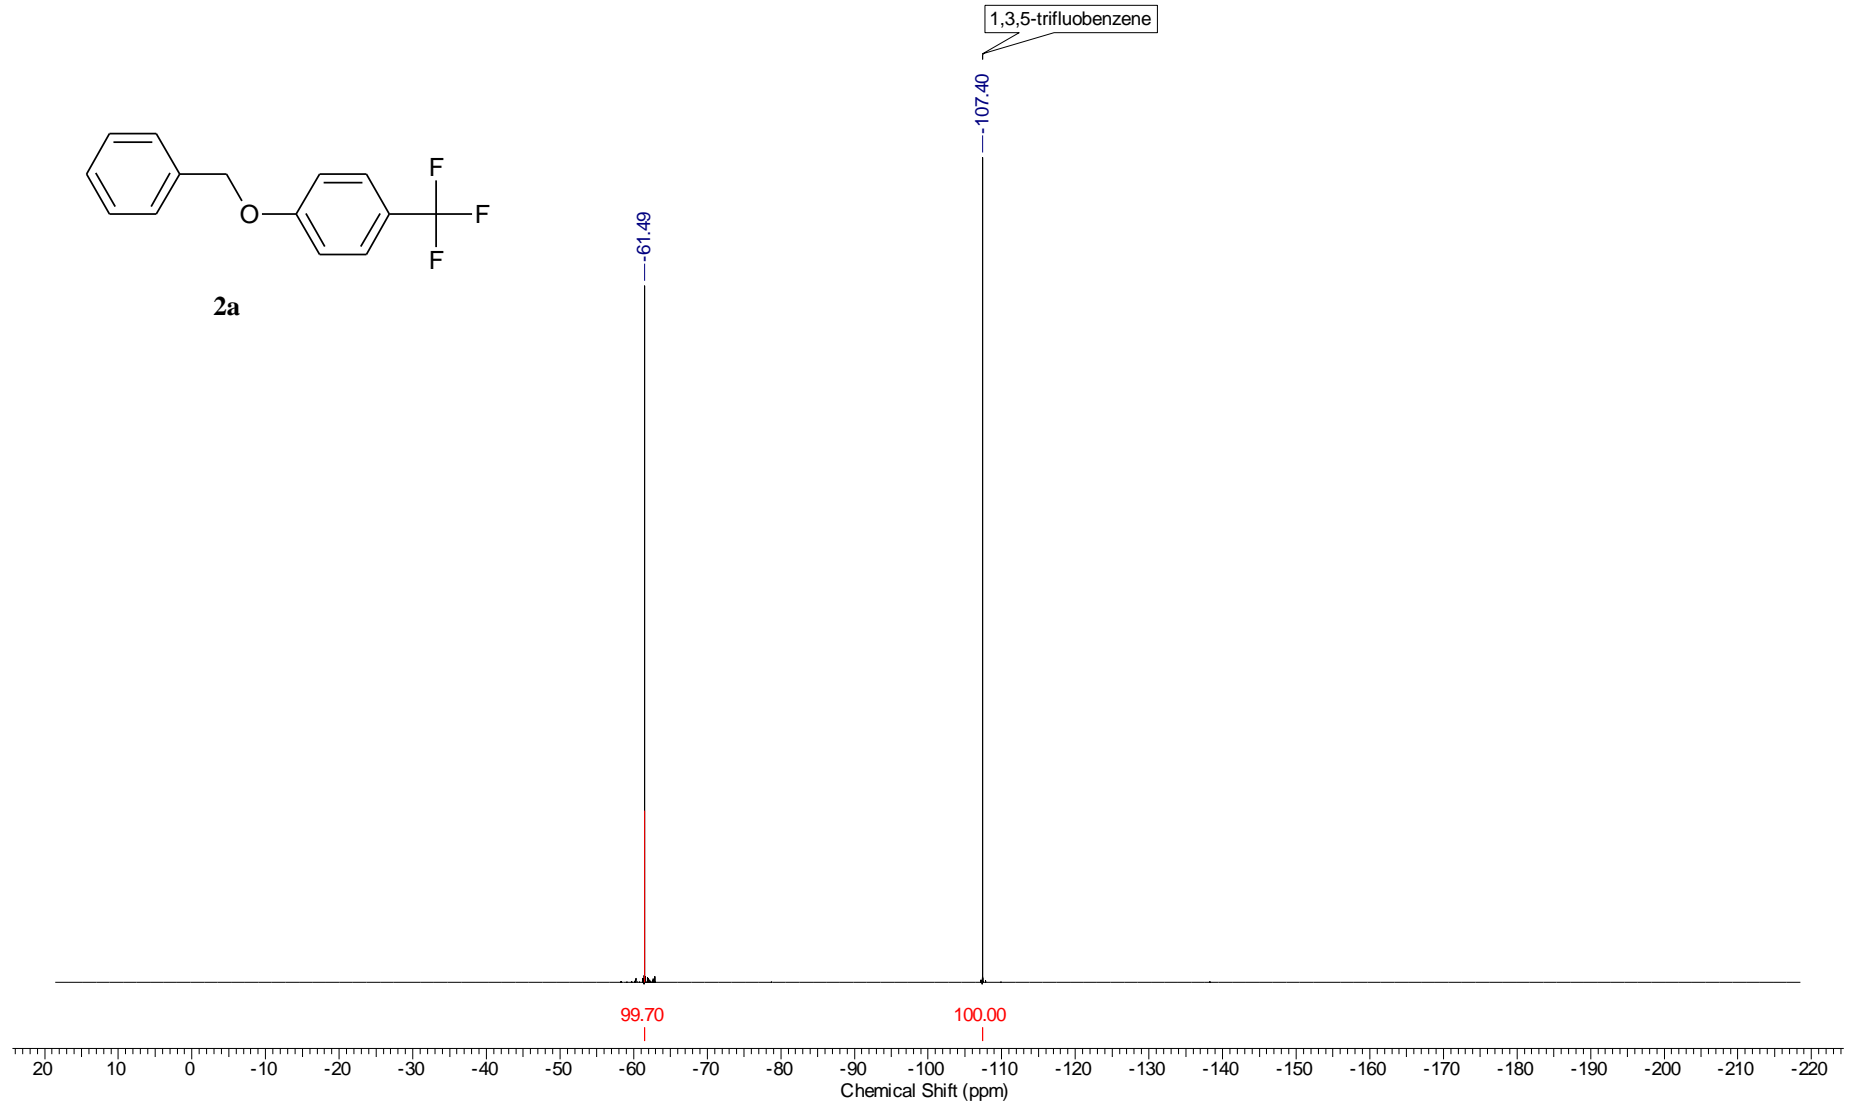

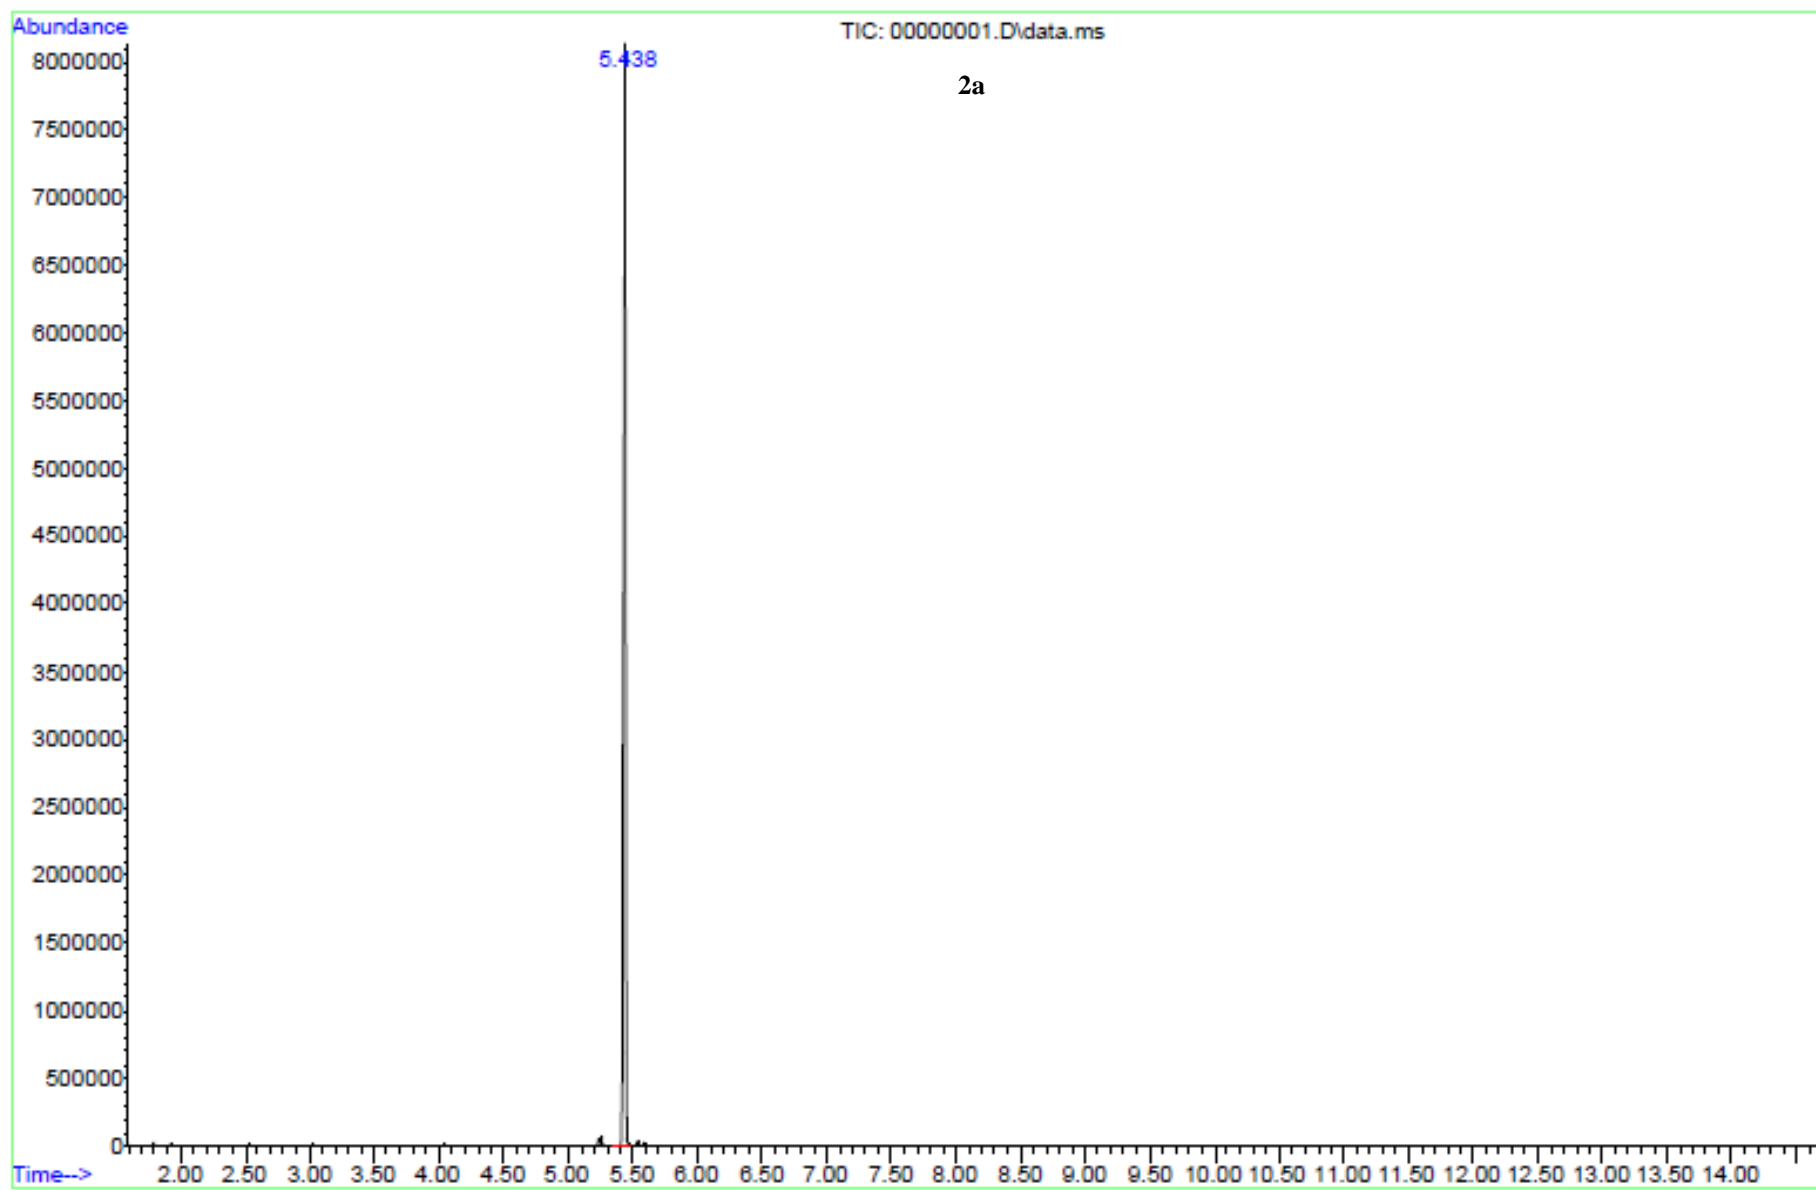

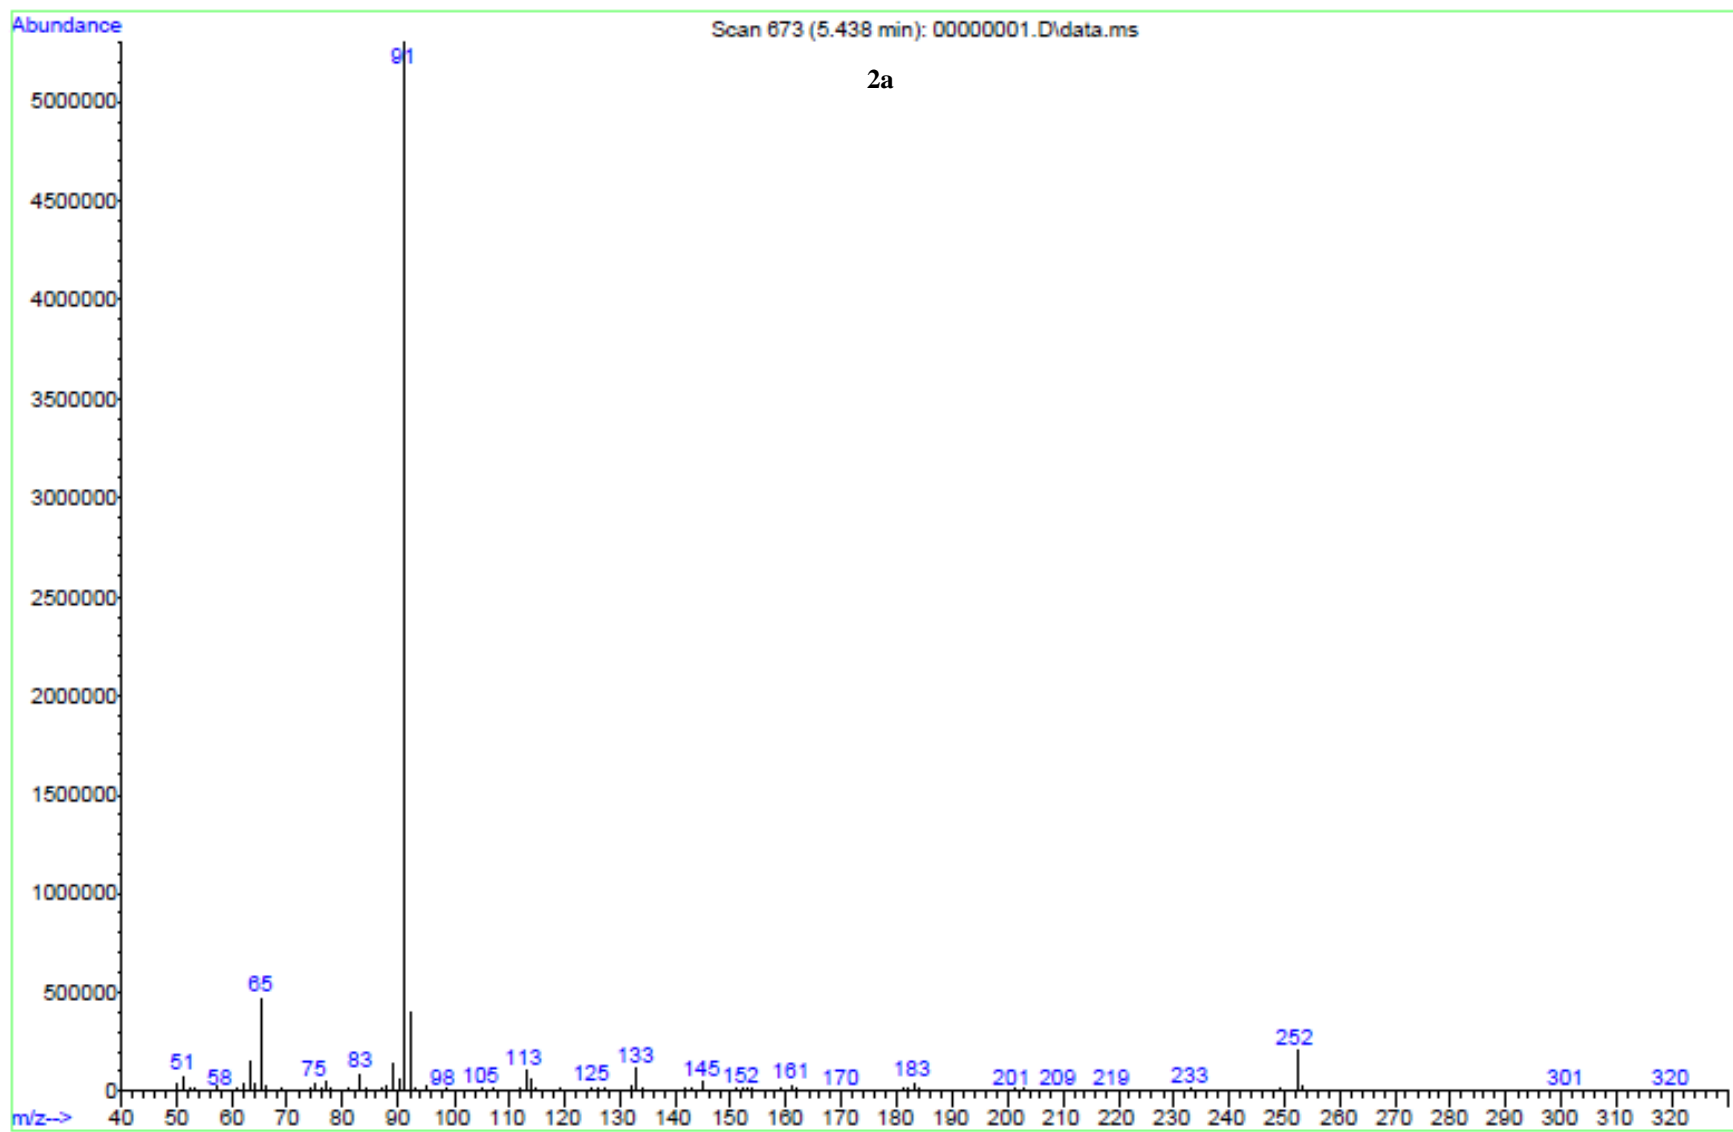

|                       |              |                      |                |                      |         |                        |                     |
|-----------------------|--------------|----------------------|----------------|----------------------|---------|------------------------|---------------------|
| Frequency (MHz)       | 400.40       | Nucleus              | 1H             | Number of Transients | 16      | Origin                 | Bruker BioSpin GmbH |
| Original Points Count | 32768        | Owner                | tibbe_operator | Points Count         | 32768   | SW(cyclical) (Hz)      | 7211.32             |
| Solvent               | CHLOROFORM-d | Spectrum Offset (Hz) | 3395.8613      | Sweep Width (Hz)     | 7211.10 | Temperature (degree C) | 27.000              |

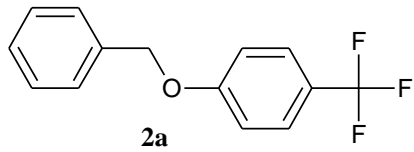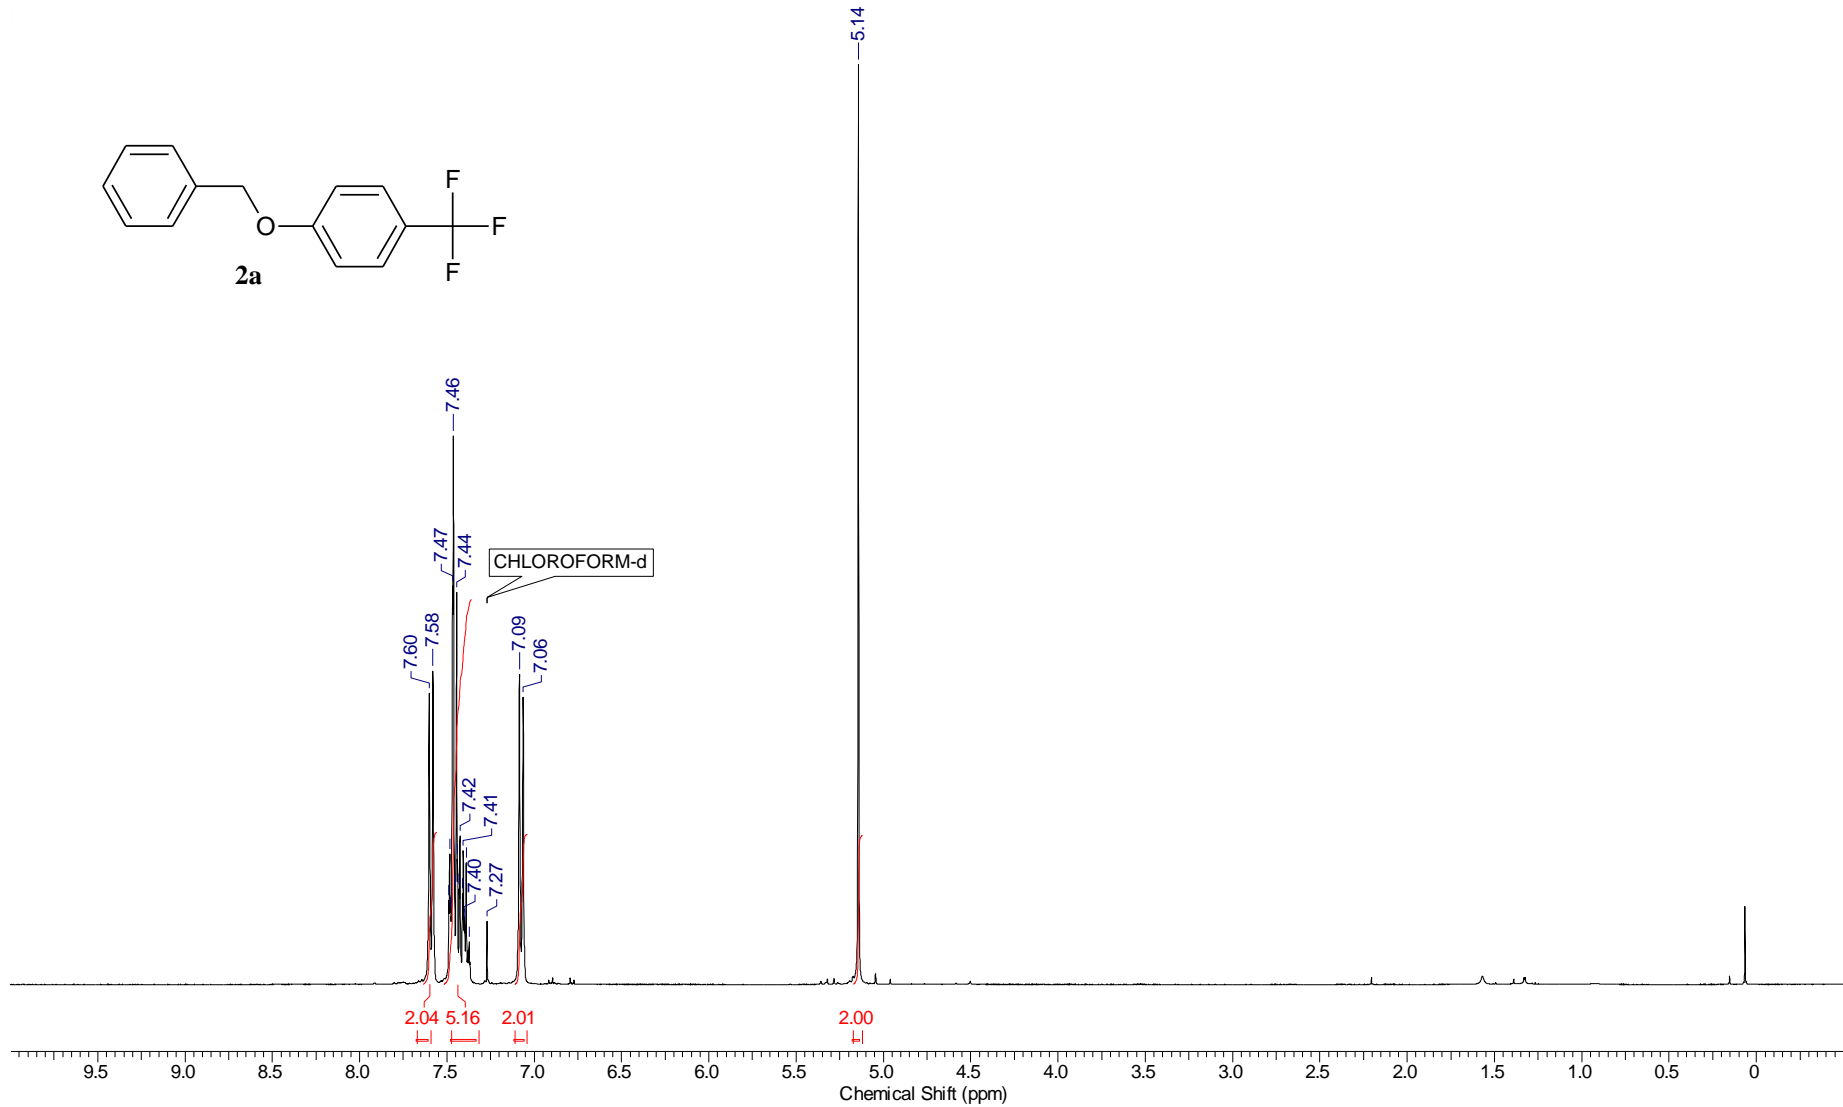

|                              |              |                             |                 |                             |          |                               |                     |
|------------------------------|--------------|-----------------------------|-----------------|-----------------------------|----------|-------------------------------|---------------------|
| <b>Frequency (MHz)</b>       | 100.69       | <b>Nucleus</b>              | <sup>13</sup> C | <b>Number of Transients</b> | 1024     | <b>Origin</b>                 | Bruker BioSpin GmbH |
| <b>Original Points Count</b> | 32768        | <b>Owner</b>                | tibbe_operator  | <b>Points Count</b>         | 32768    | <b>SW(cyclical) (Hz)</b>      | 24037.73            |
| <b>Solvent</b>               | CHLOROFORM-d | <b>Spectrum Offset (Hz)</b> | 10062.8418      | <b>Sweep Width (Hz)</b>     | 24036.99 | <b>Temperature (degree C)</b> | 27.000              |

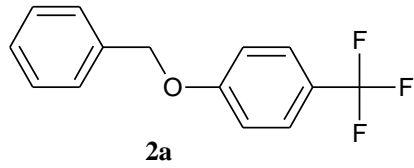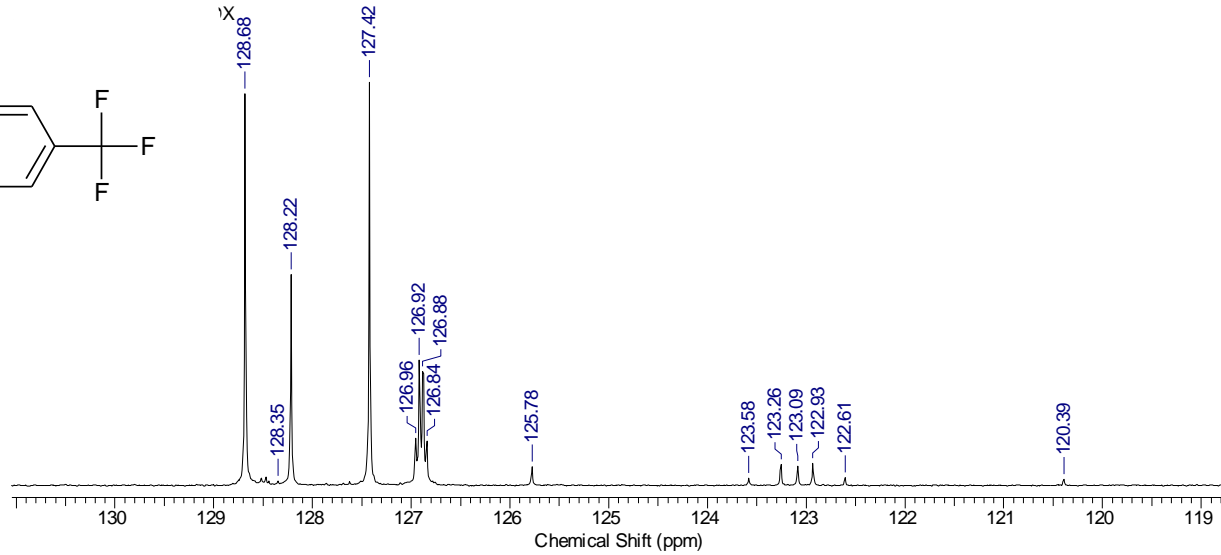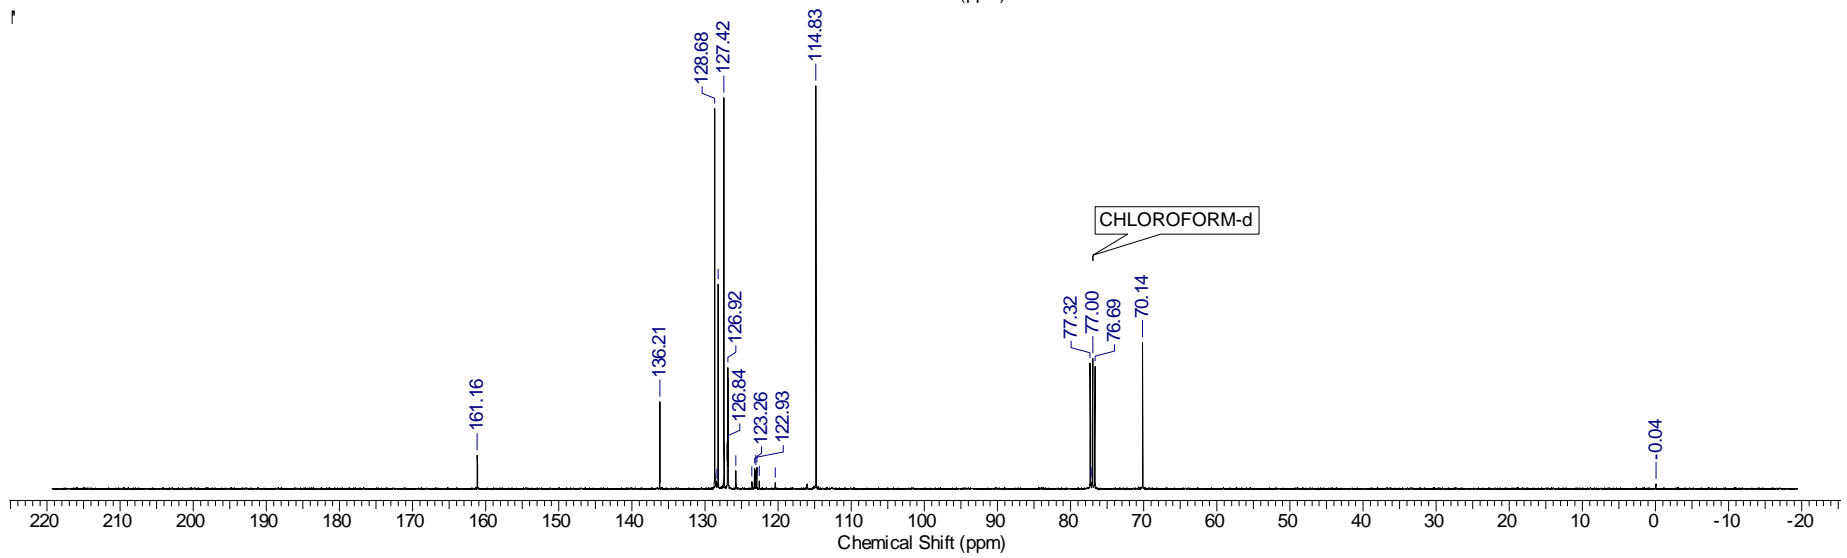

|                       |              |                      |                          |                      |          |                        |                     |
|-----------------------|--------------|----------------------|--------------------------|----------------------|----------|------------------------|---------------------|
| Frequency (MHz)       | 100.69       | Nucleus              | <sup>13</sup> C Dept 135 | Number of Transients | 256      | Origin                 | Bruker BioSpin GmbH |
| Original Points Count | 32768        | Owner                | tibbe_operator           | Points Count         | 32768    | SW(cyclical) (Hz)      | 24037.73            |
| Solvent               | CHLOROFORM-d | Spectrum Offset (Hz) | 10063.1289               | Sweep Width (Hz)     | 24036.99 | Temperature (degree C) | 28.300              |

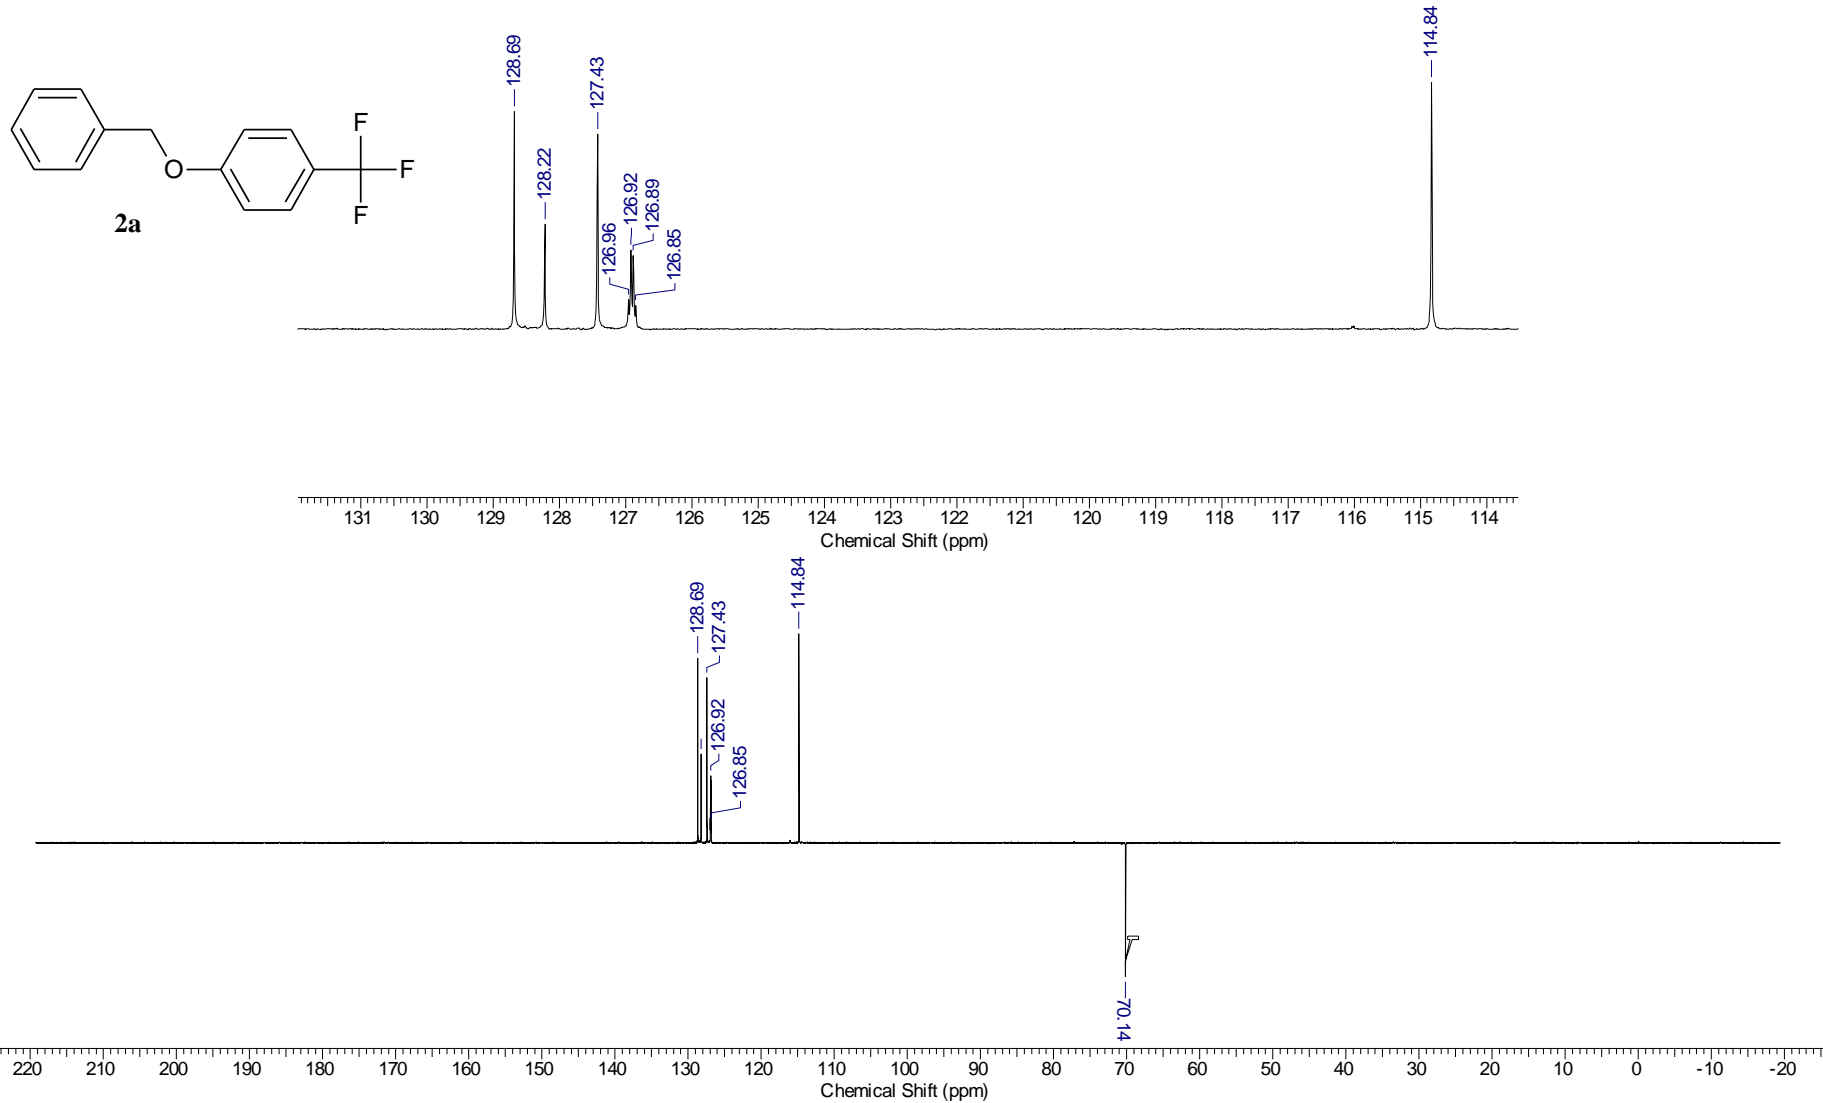

|                              |              |                             |                 |                             |          |                               |                     |
|------------------------------|--------------|-----------------------------|-----------------|-----------------------------|----------|-------------------------------|---------------------|
| <b>Frequency (MHz)</b>       | 376.71       | <b>Nucleus</b>              | <sup>19</sup> F | <b>Number of Transients</b> | 64       | <b>Origin</b>                 | Bruker BioSpin GmbH |
| <b>Original Points Count</b> | 131072       | <b>Owner</b>                | tibbe_operator  | <b>Points Count</b>         | 131072   | <b>SW(cyclical) (Hz)</b>      | 93749.28            |
| <b>Solvent</b>               | CHLOROFORM-d | <b>Spectrum Offset (Hz)</b> | -37674.7617     | <b>Sweep Width (Hz)</b>     | 93748.56 | <b>Temperature (degree C)</b> | 27.000              |

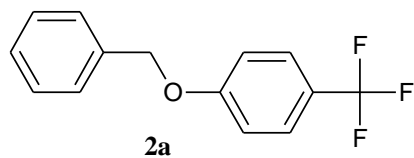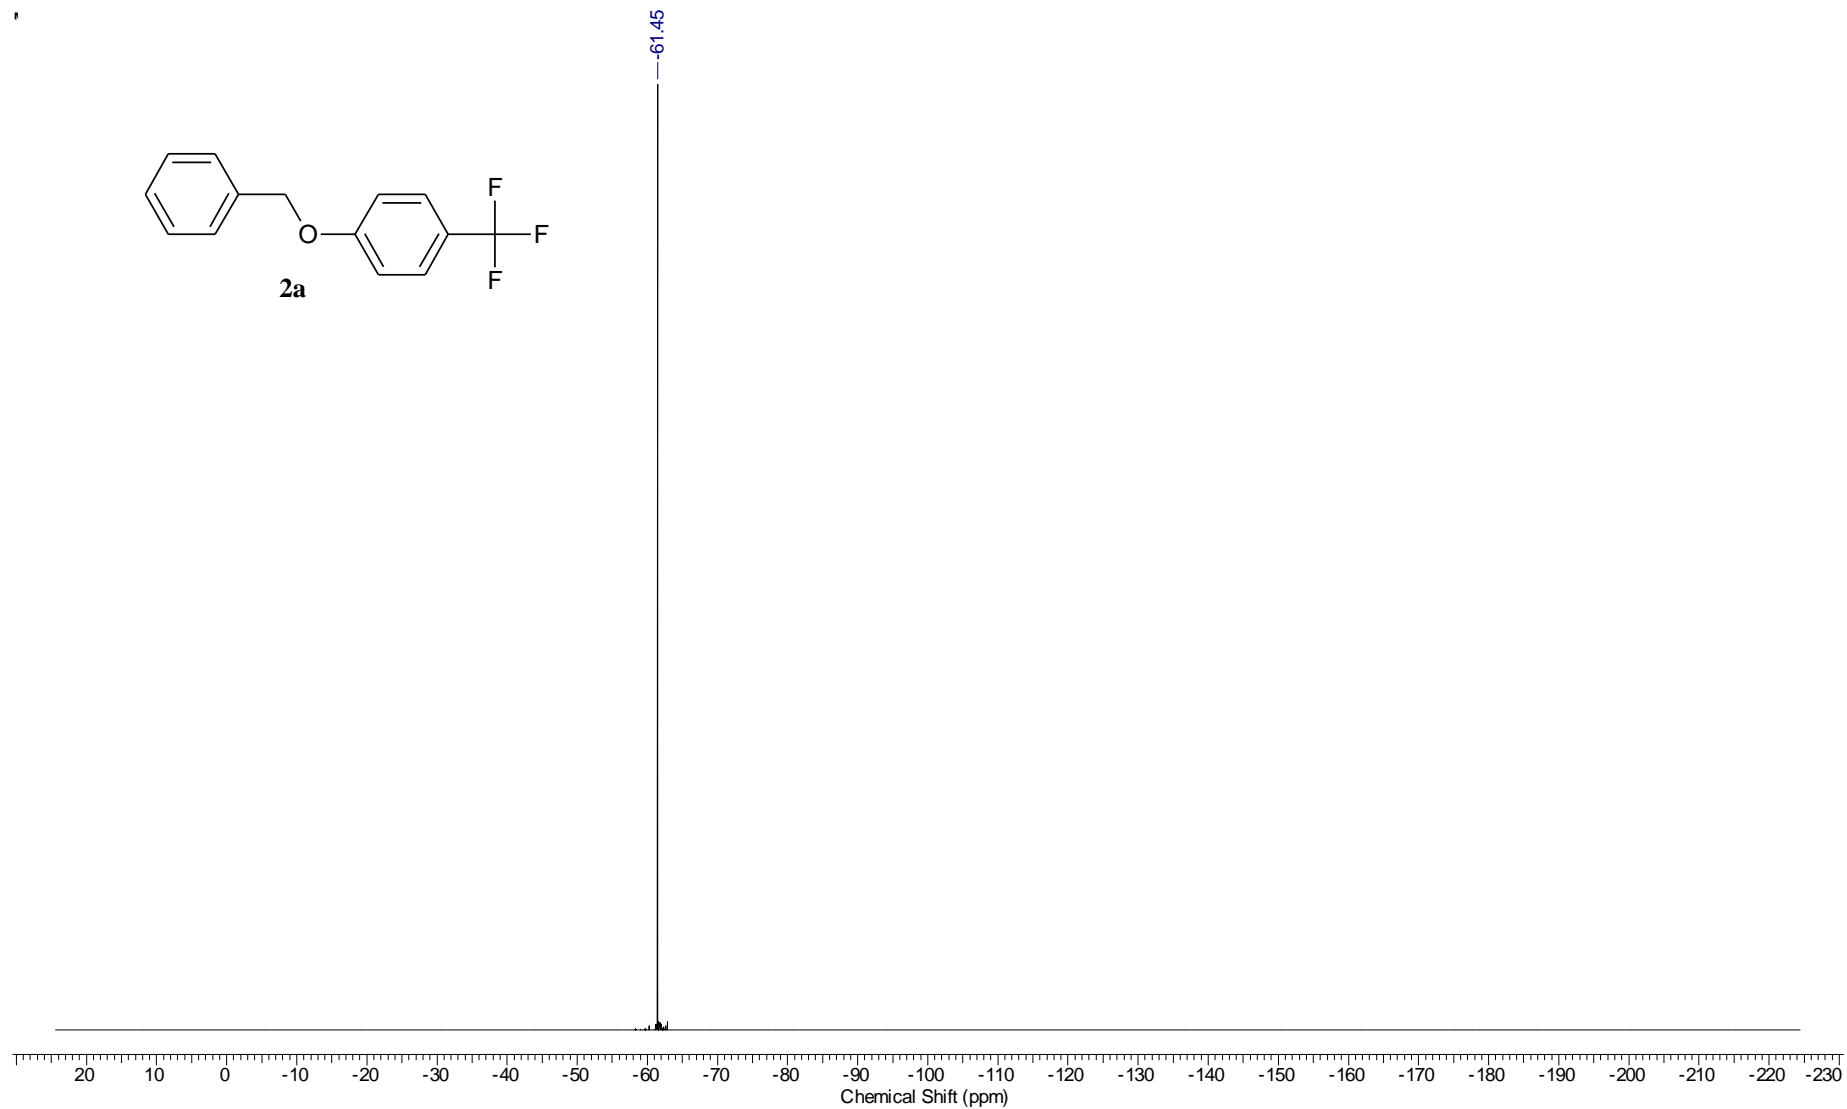



|                       |              |                      |                |                      |          |                        |                     |
|-----------------------|--------------|----------------------|----------------|----------------------|----------|------------------------|---------------------|
| Frequency (MHz)       | 376.71       | Nucleus              | 19F            | Number of Transients | 64       | Origin                 | Bruker BioSpin GmbH |
| Original Points Count | 131072       | Owner                | tibbe_operator | Points Count         | 131072   | SW(cyclical) (Hz)      | 89285.03            |
| Solvent               | CHLOROFORM-d | Spectrum Offset (Hz) | -37389.3828    | Sweep Width (Hz)     | 89284.35 | Temperature (degree C) | 27.000              |

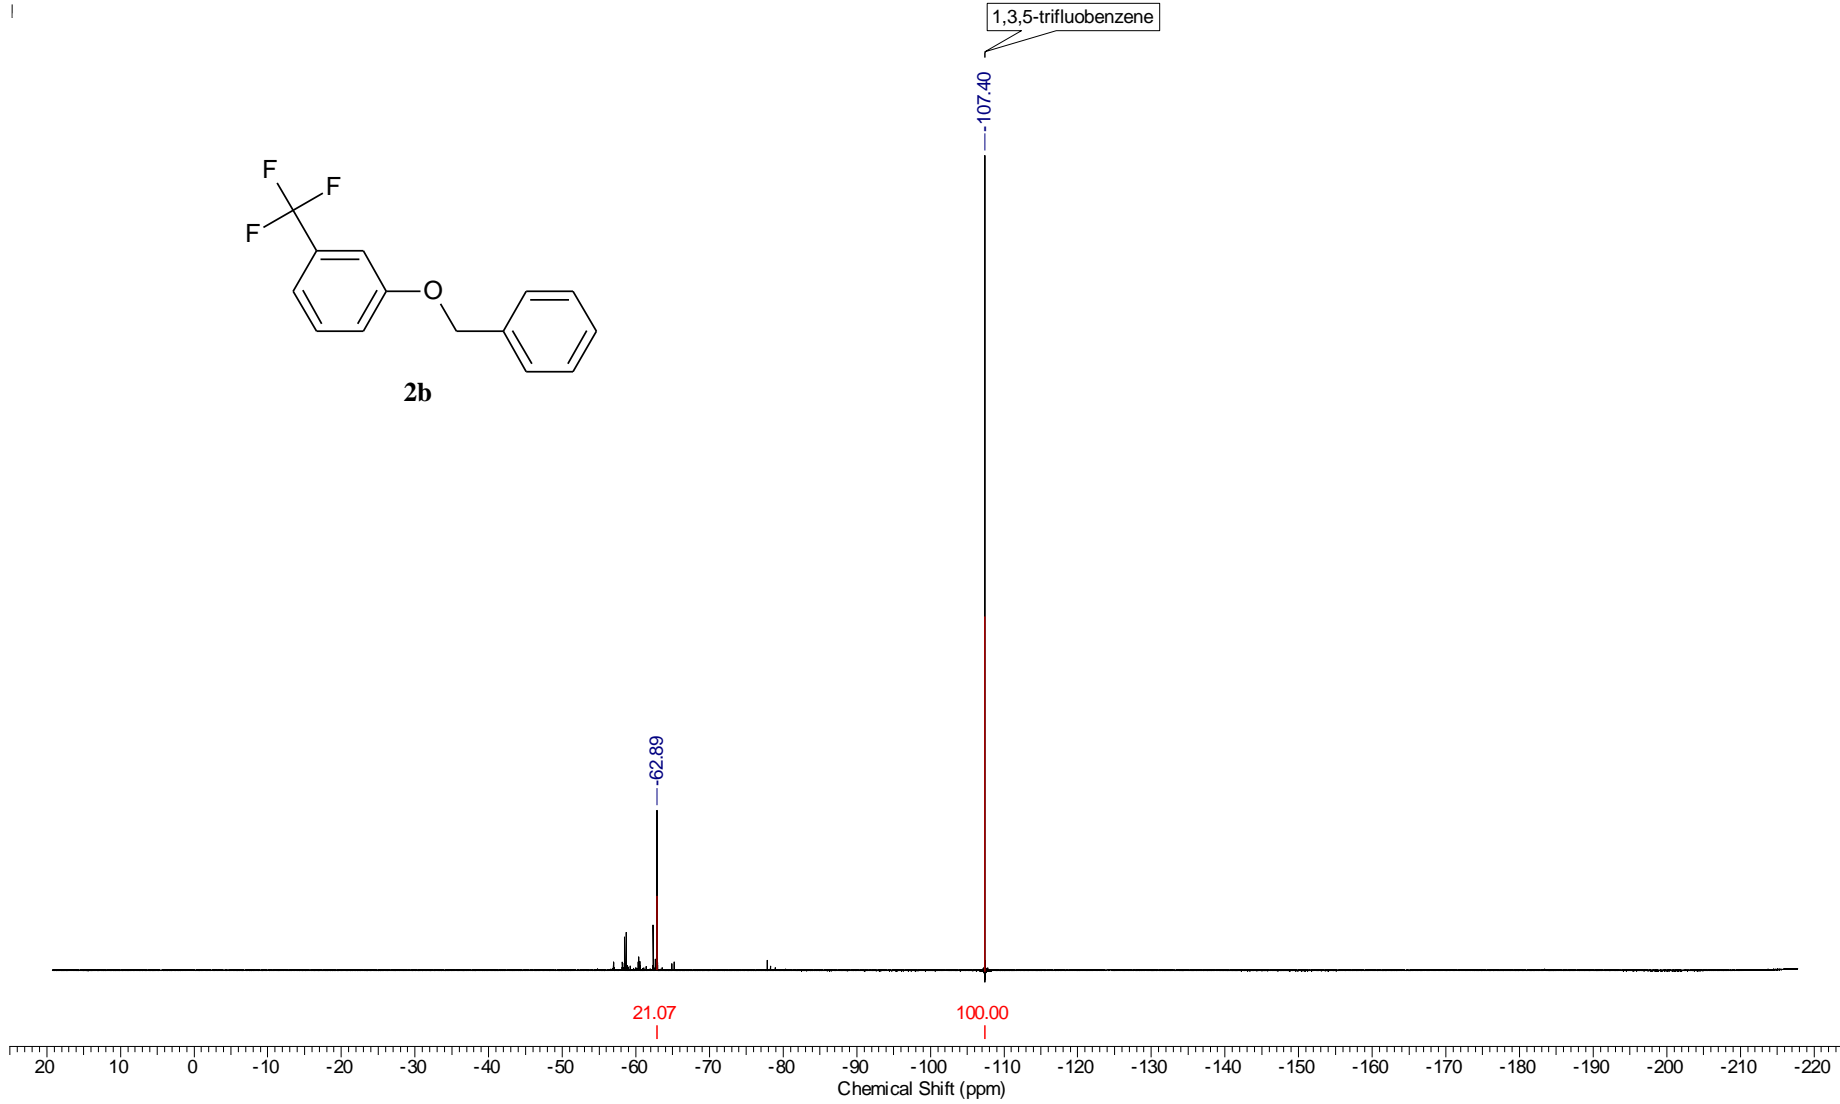

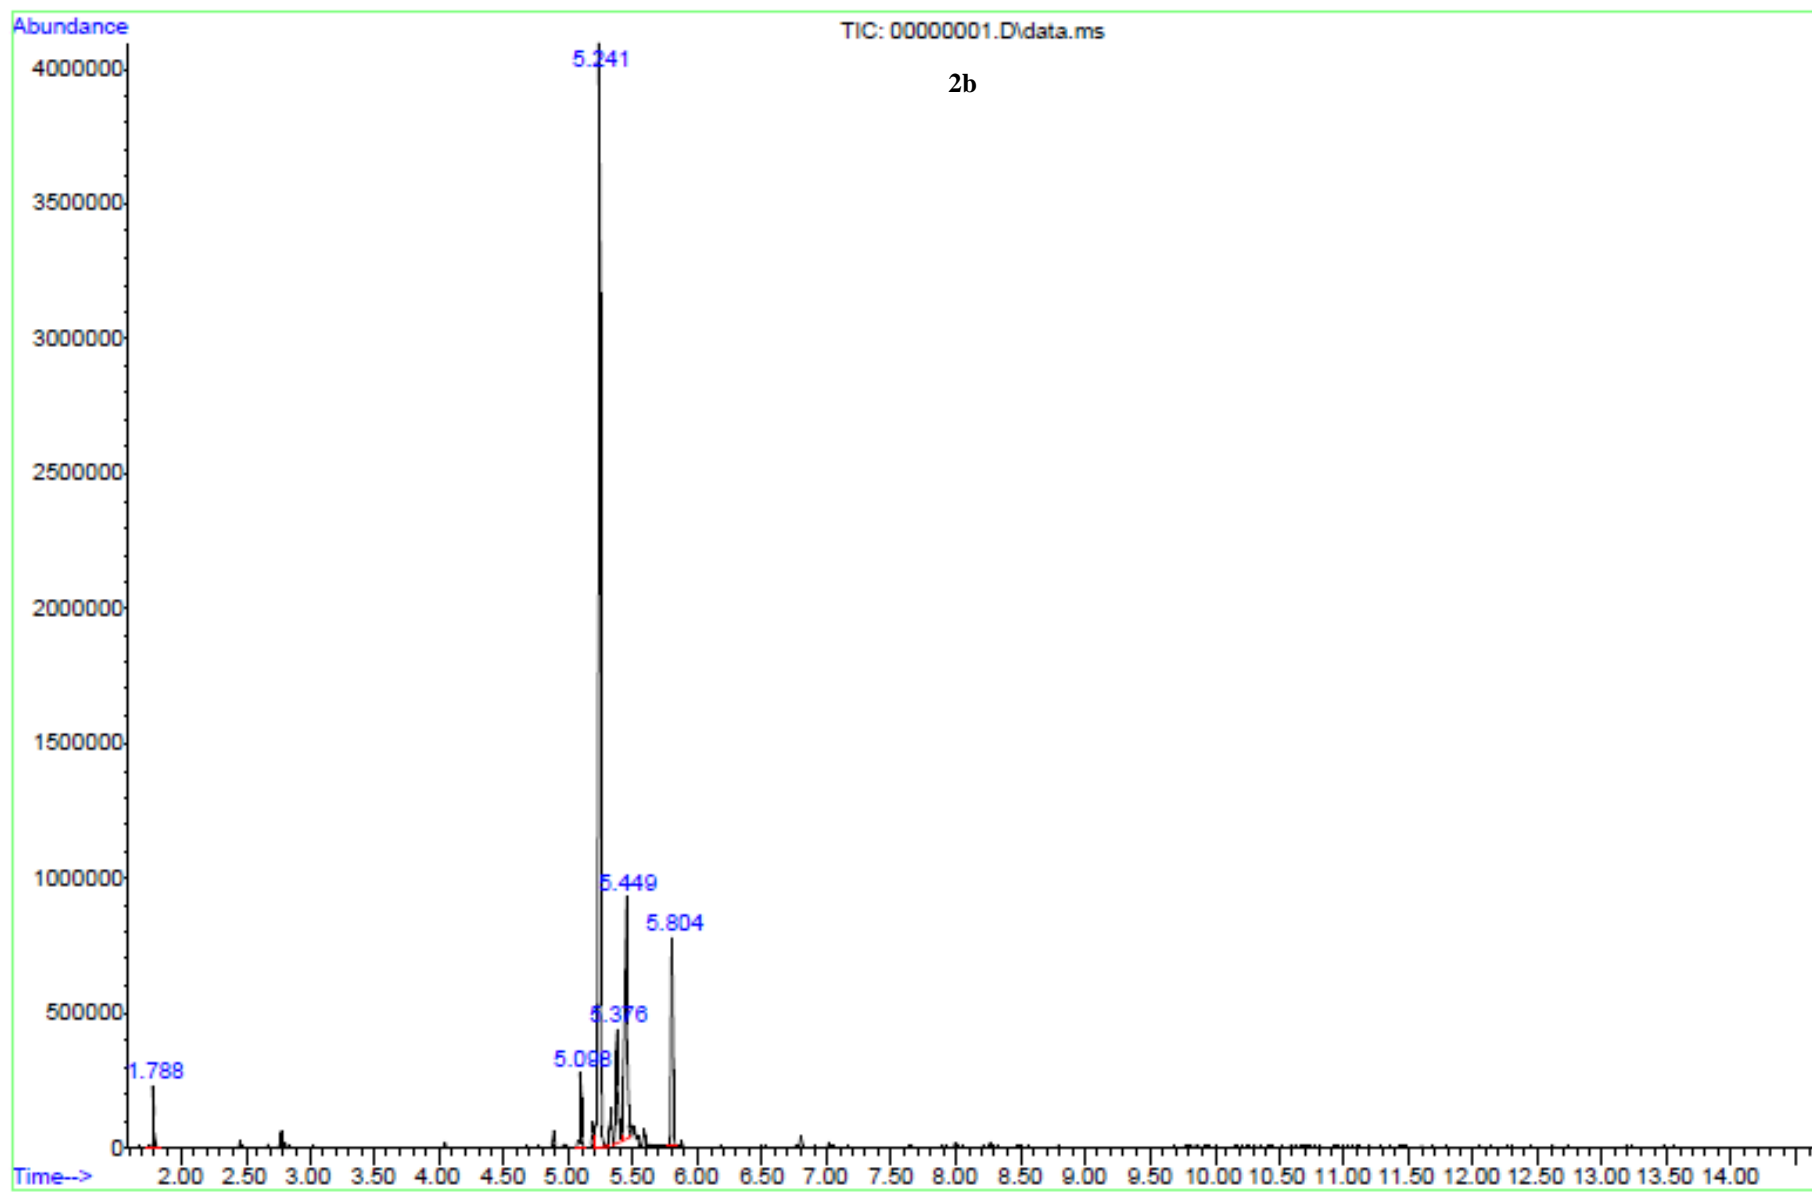

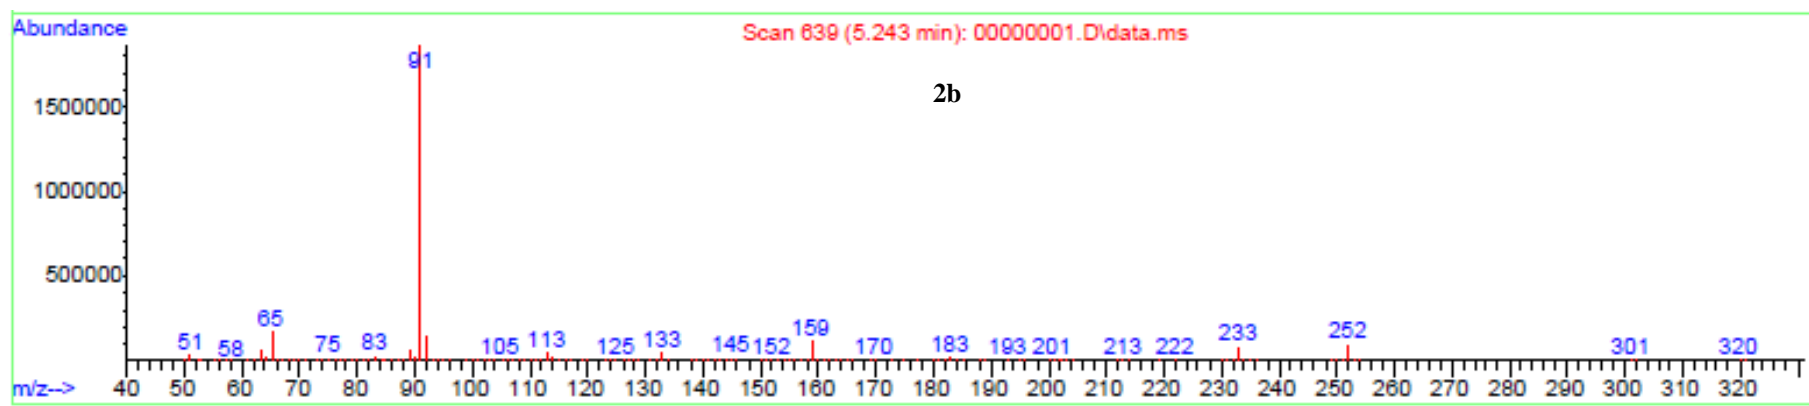

|                       |              |                      |                |                      |         |                        |                     |
|-----------------------|--------------|----------------------|----------------|----------------------|---------|------------------------|---------------------|
| Frequency (MHz)       | 400.40       | Nucleus              | 1H             | Number of Transients | 16      | Origin                 | Bruker BioSpin GmbH |
| Original Points Count | 32768        | Owner                | tibbe_operator | Points Count         | 32768   | SW(cyclical) (Hz)      | 7211.32             |
| Solvent               | CHLOROFORM-d | Spectrum Offset (Hz) | 3395.6414      | Sweep Width (Hz)     | 7211.10 | Temperature (degree C) | 27.000              |

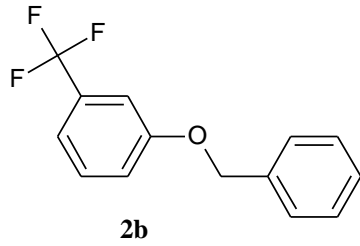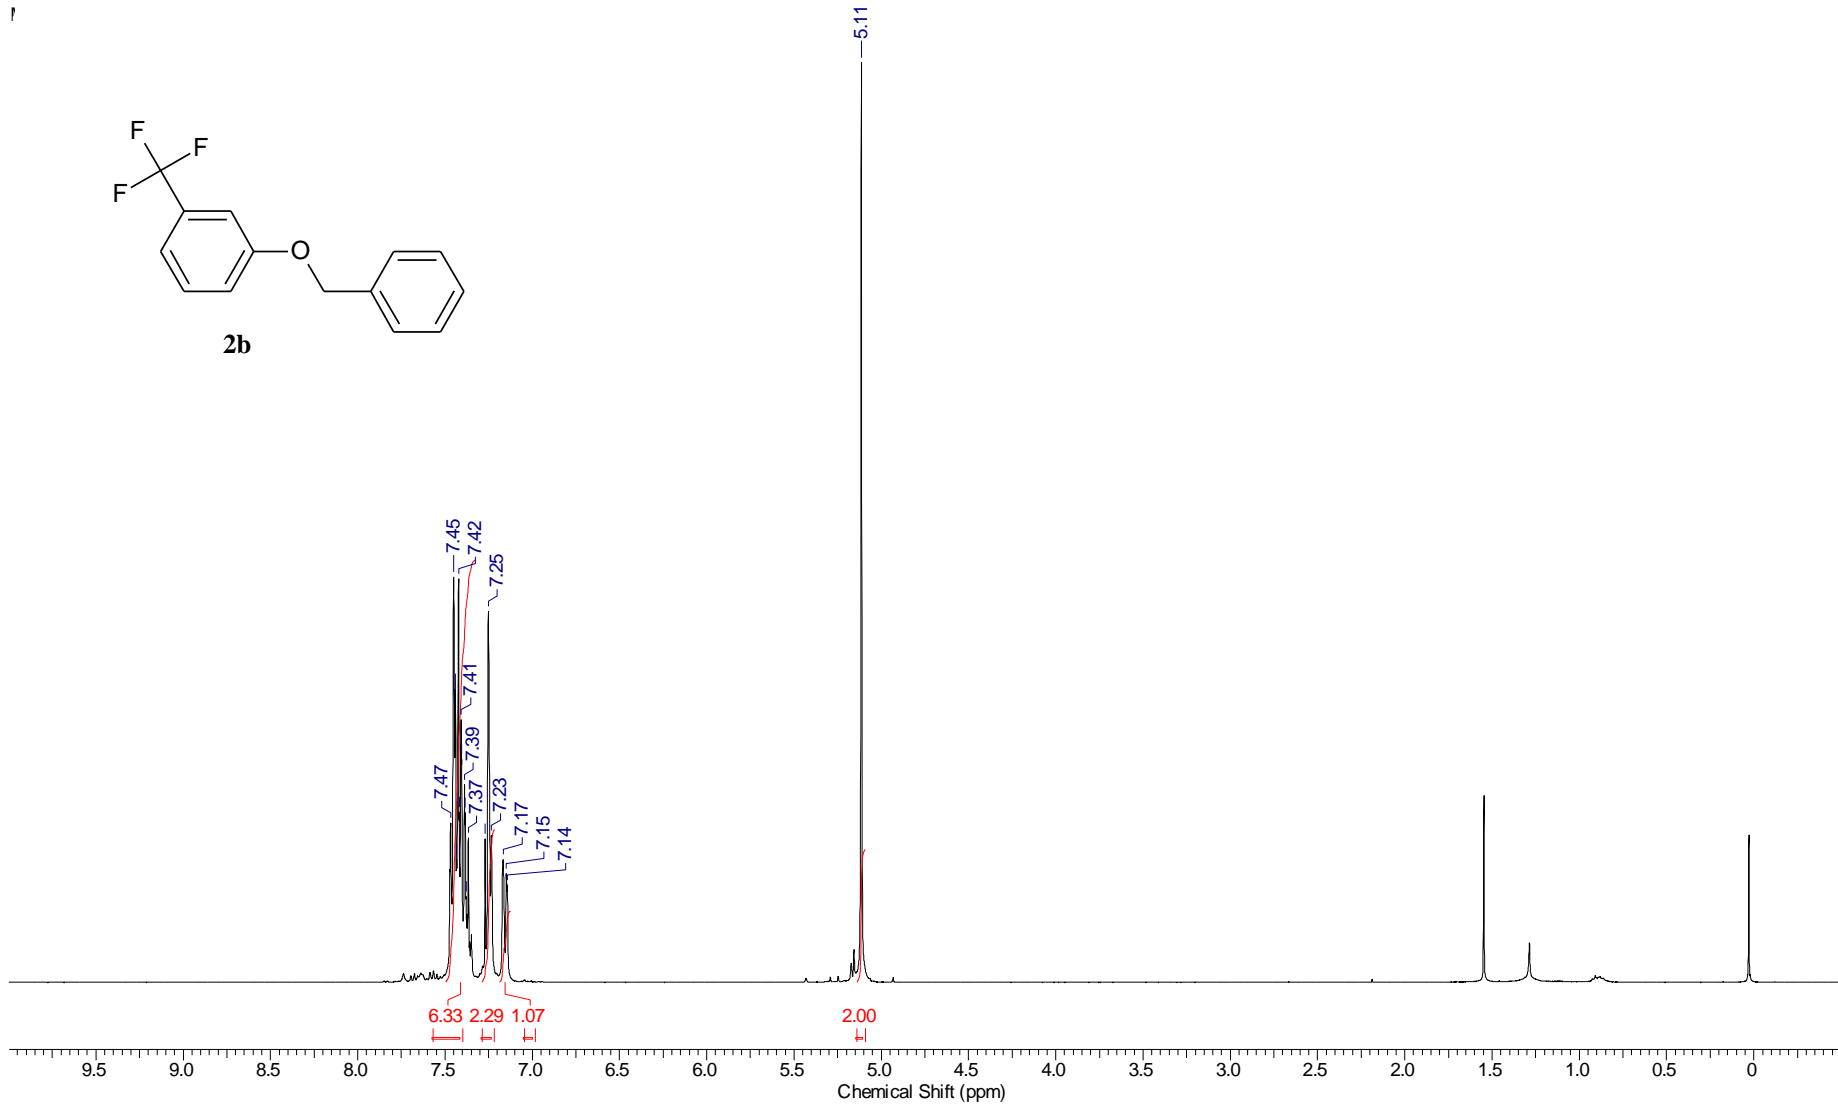

|                       |              |                      |                 |                      |          |                        |                     |
|-----------------------|--------------|----------------------|-----------------|----------------------|----------|------------------------|---------------------|
| Frequency (MHz)       | 100.69       | Nucleus              | <sup>13</sup> C | Number of Transients | 1024     | Origin                 | Bruker BioSpin GmbH |
| Original Points Count | 32768        | Owner                | tibbe_operator  | Points Count         | 32768    | SW(cyclical) (Hz)      | 24037.73            |
| Solvent               | CHLOROFORM-d | Spectrum Offset (Hz) | 10066.5088      | Sweep Width (Hz)     | 24036.99 | Temperature (degree C) | 27.000              |

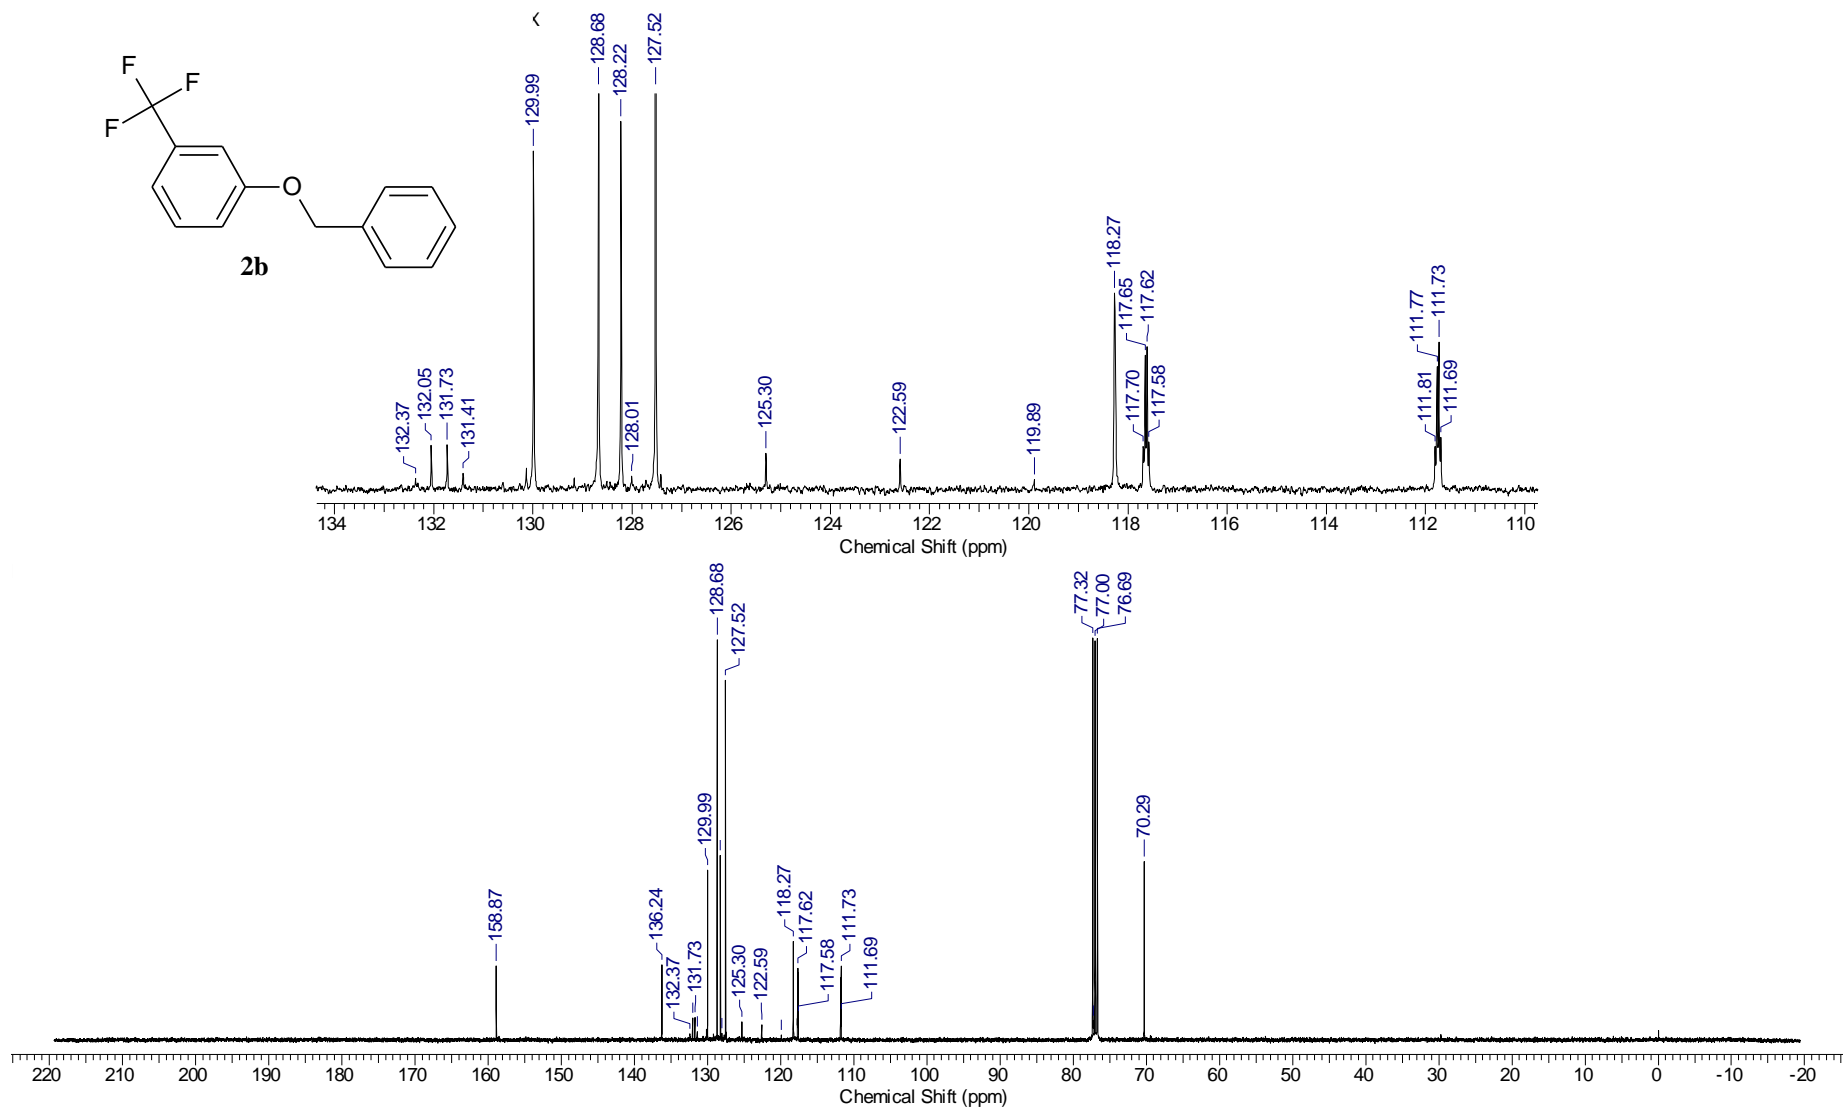

|                       |              |                      |                          |                      |          |                        |                     |
|-----------------------|--------------|----------------------|--------------------------|----------------------|----------|------------------------|---------------------|
| Frequency (MHz)       | 100.69       | Nucleus              | <sup>13</sup> C Dept 135 | Number of Transients | 256      | Origin                 | Bruker BioSpin GmbH |
| Original Points Count | 32768        | Owner                | tibbe_operator           | Points Count         | 32768    | SW(cyclical) (Hz)      | 24037.73            |
| Solvent               | CHLOROFORM-d | Spectrum Offset (Hz) | 10066.4961               | Sweep Width (Hz)     | 24036.99 | Temperature (degree C) | 27.000              |

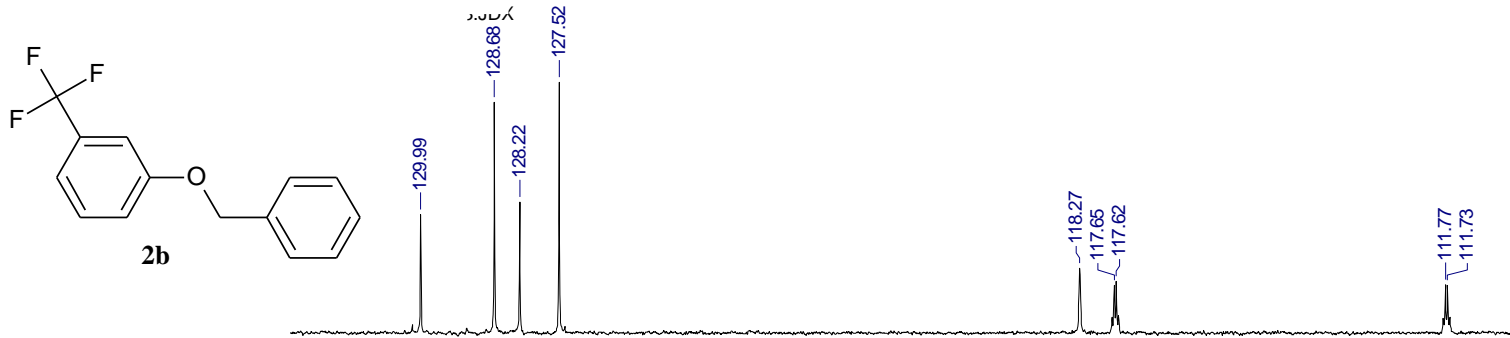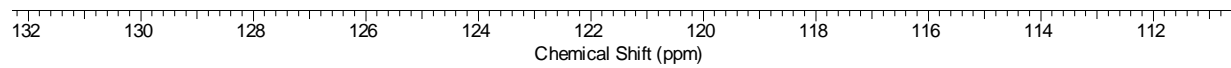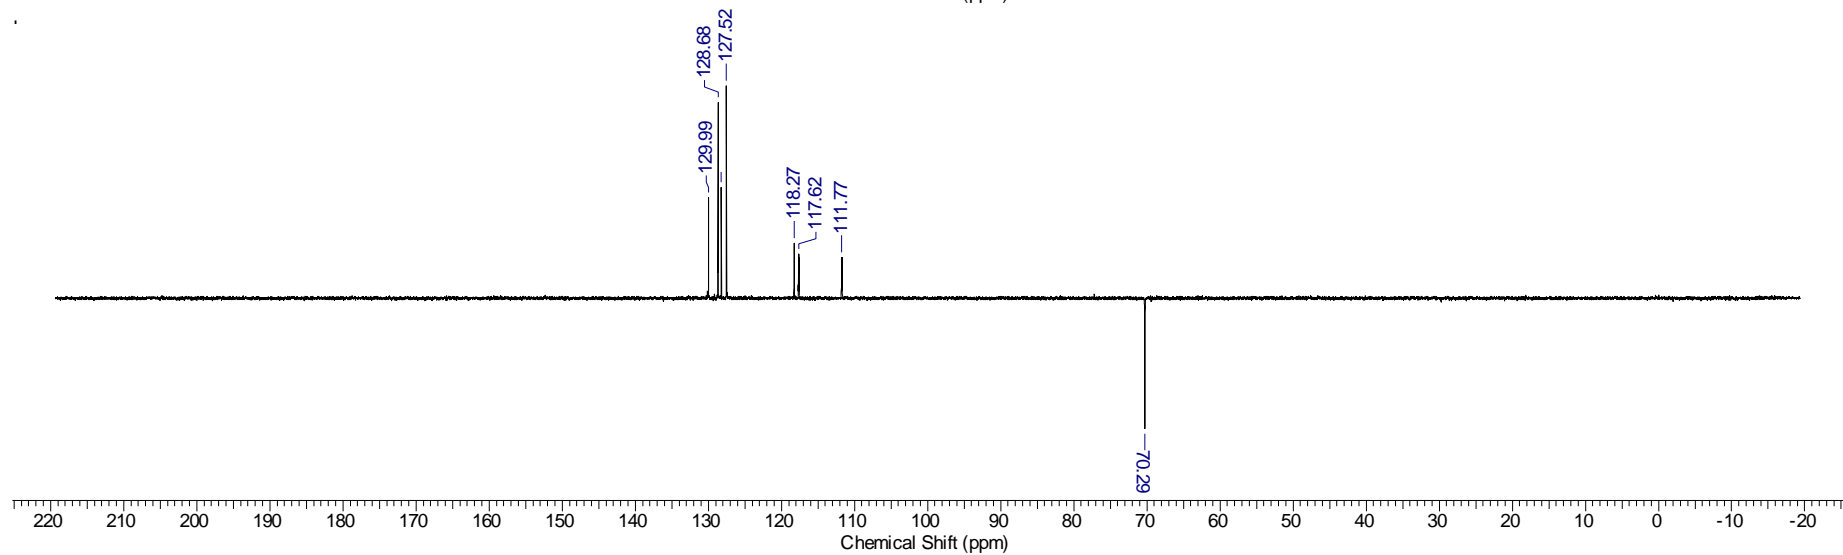

|                              |              |                             |                |                             |          |                               |                     |
|------------------------------|--------------|-----------------------------|----------------|-----------------------------|----------|-------------------------------|---------------------|
| <b>Frequency (MHz)</b>       | 376.71       | <b>Nucleus</b>              | 19F            | <b>Number of Transients</b> | 64       | <b>Origin</b>                 | Bruker BioSpin GmbH |
| <b>Original Points Count</b> | 131072       | <b>Owner</b>                | tibbe_operator | <b>Points Count</b>         | 131072   | <b>SW(cyclical) (Hz)</b>      | 93749.28            |
| <b>Solvent</b>               | CHLOROFORM-d | <b>Spectrum Offset (Hz)</b> | -37741.6094    | <b>Sweep Width (Hz)</b>     | 93748.56 | <b>Temperature (degree C)</b> | 27.000              |

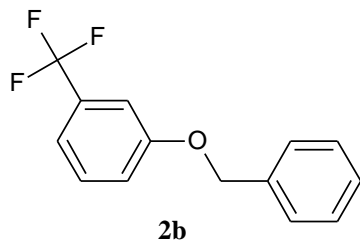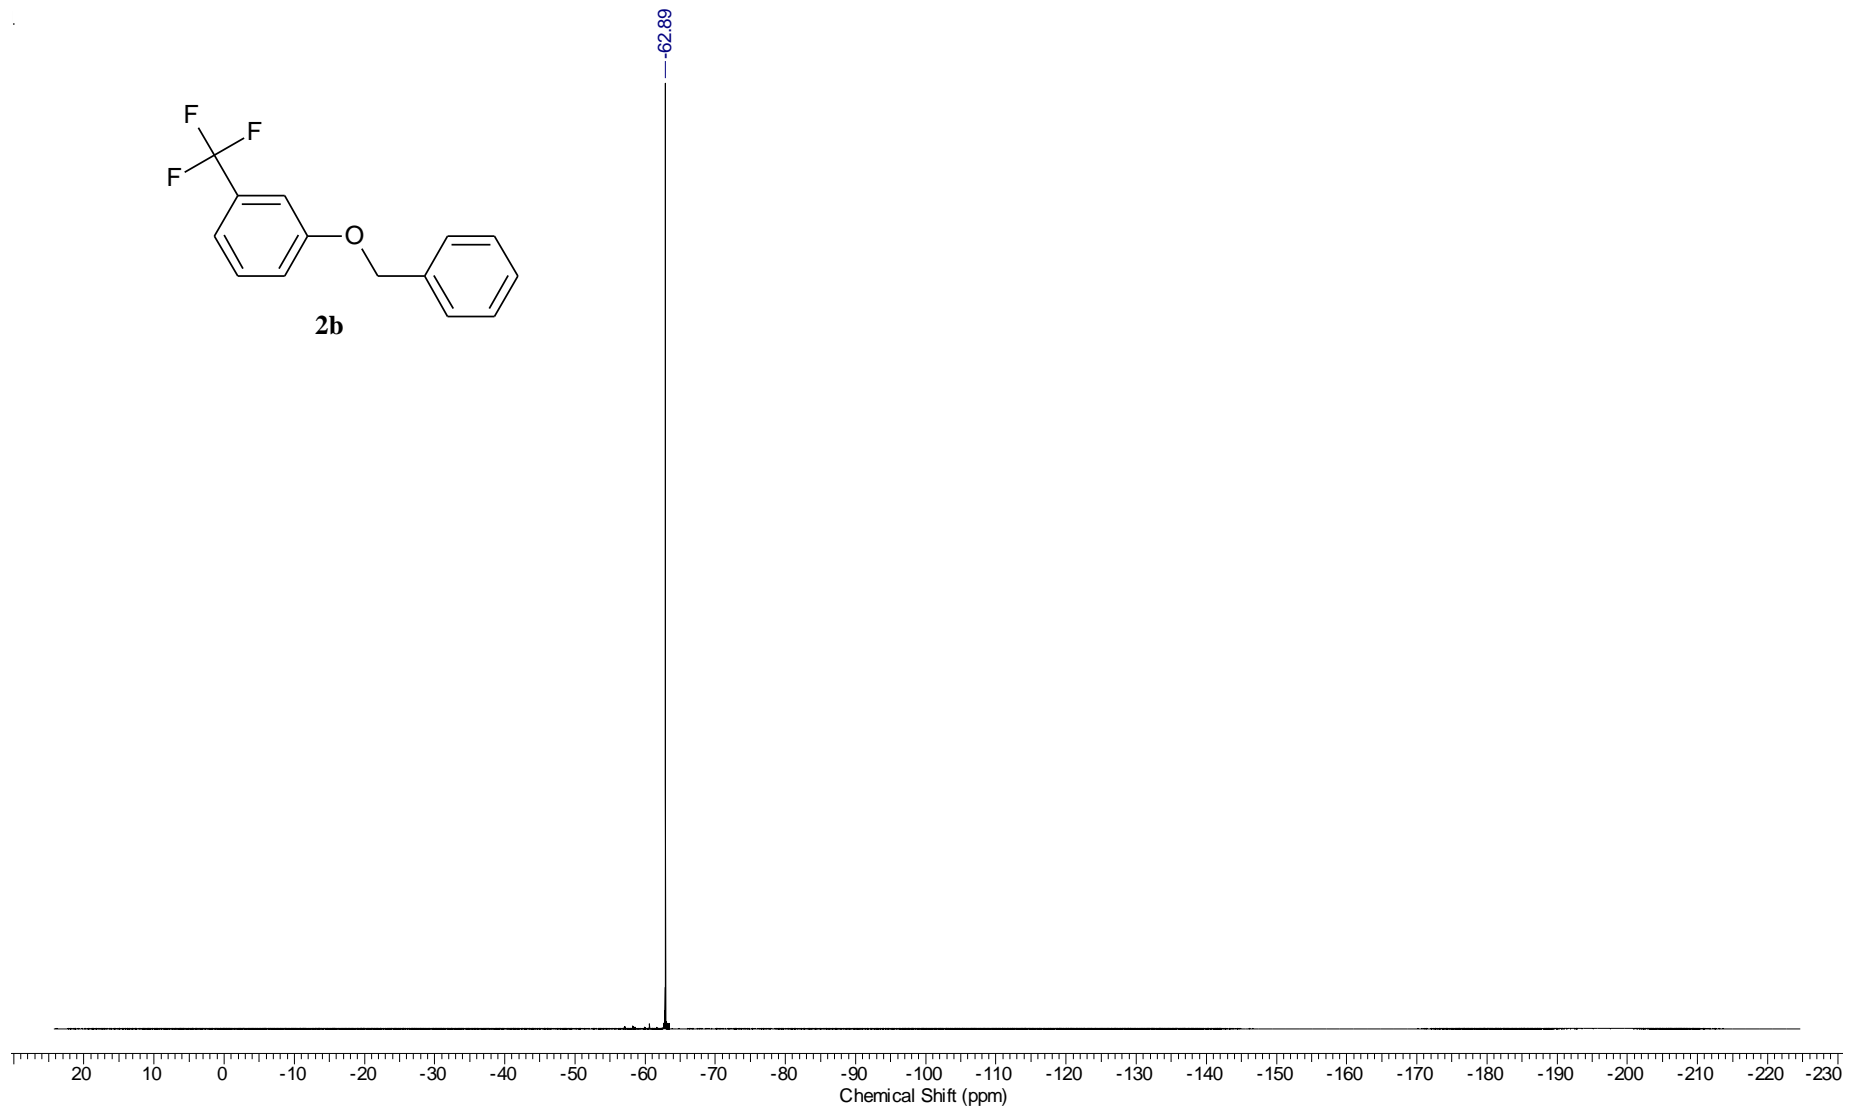

|                       |              |                      |                 |                      |          |                        |                     |
|-----------------------|--------------|----------------------|-----------------|----------------------|----------|------------------------|---------------------|
| Frequency (MHz)       | 376.71       | Nucleus              | <sup>19</sup> F | Number of Transients | 64       | Origin                 | Bruker BioSpin GmbH |
| Original Points Count | 131072       | Owner                | tibbe_operator  | Points Count         | 131072   | SW(cyclical) (Hz)      | 89285.03            |
| Solvent               | CHLOROFORM-d | Spectrum Offset (Hz) | -37337.6094     | Sweep Width (Hz)     | 89284.35 | Temperature (degree C) | 27.000              |

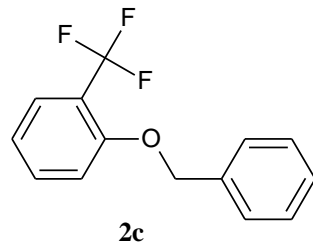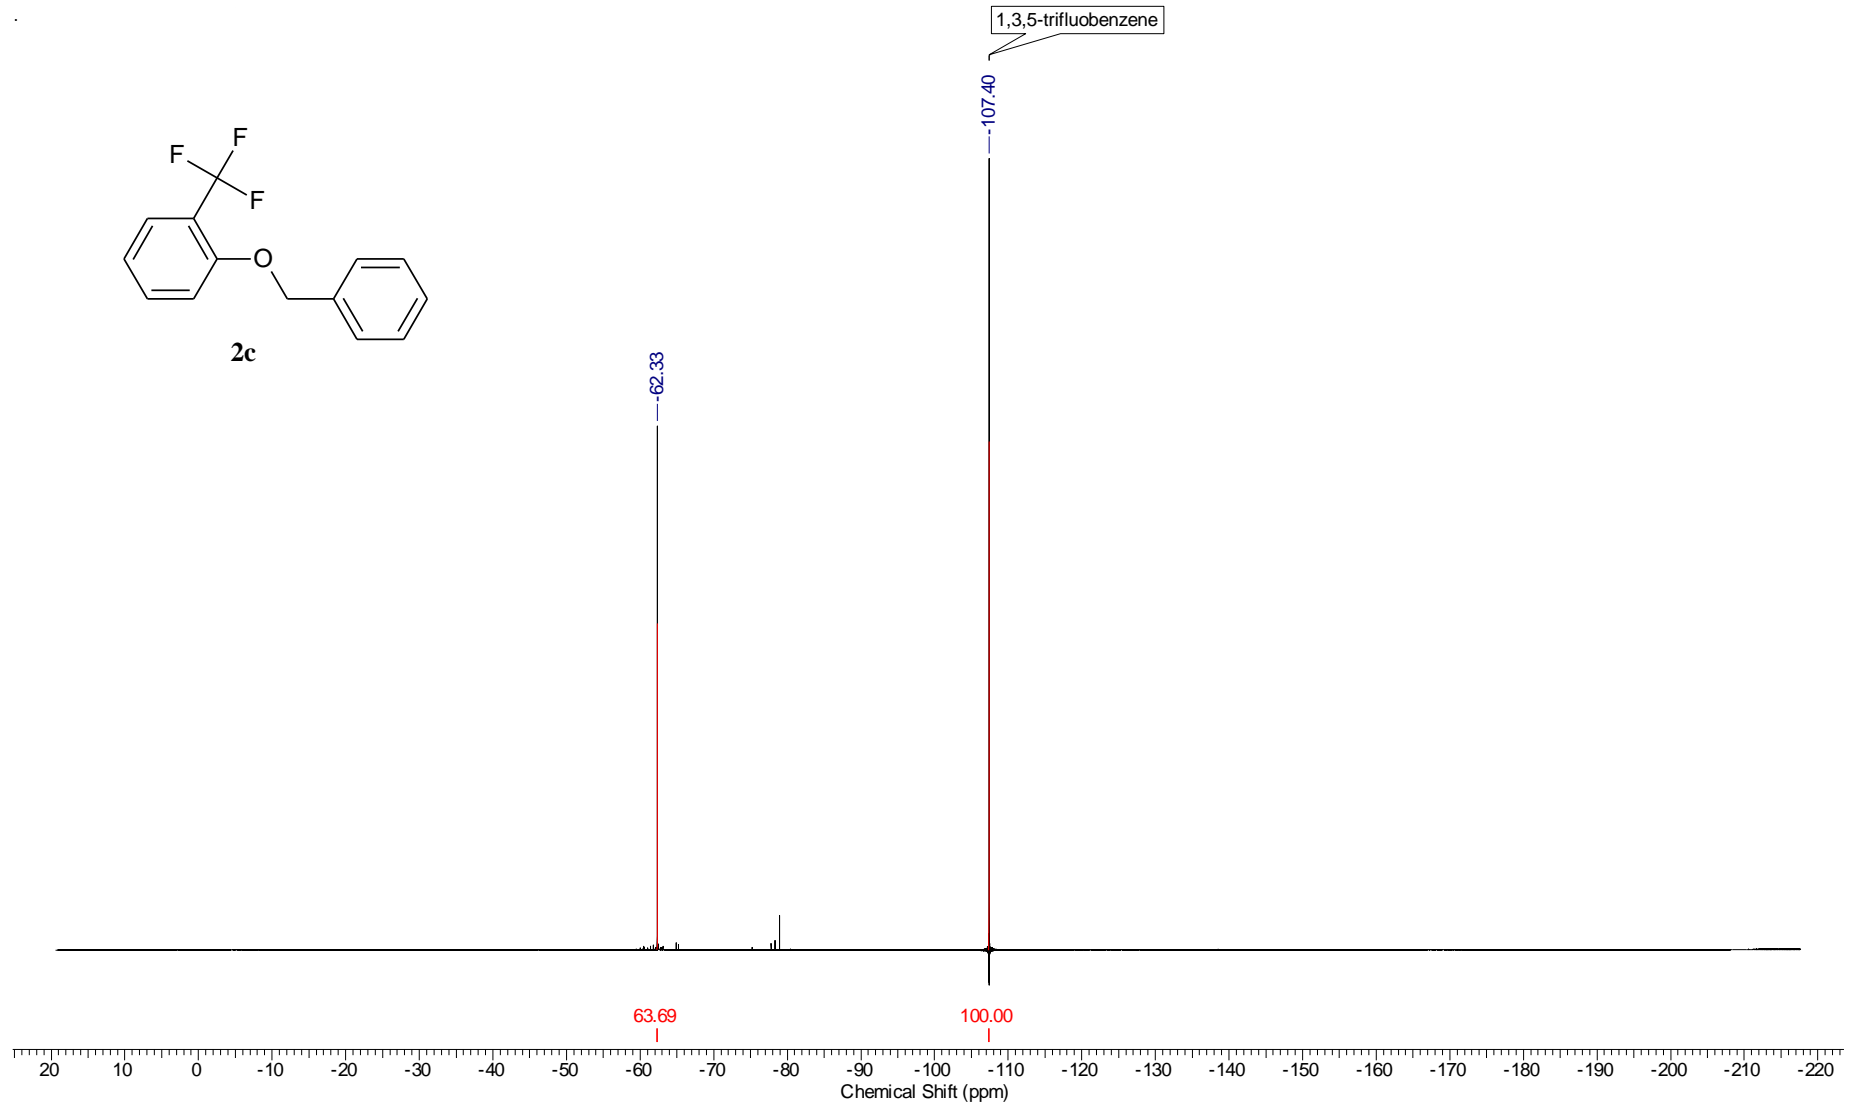



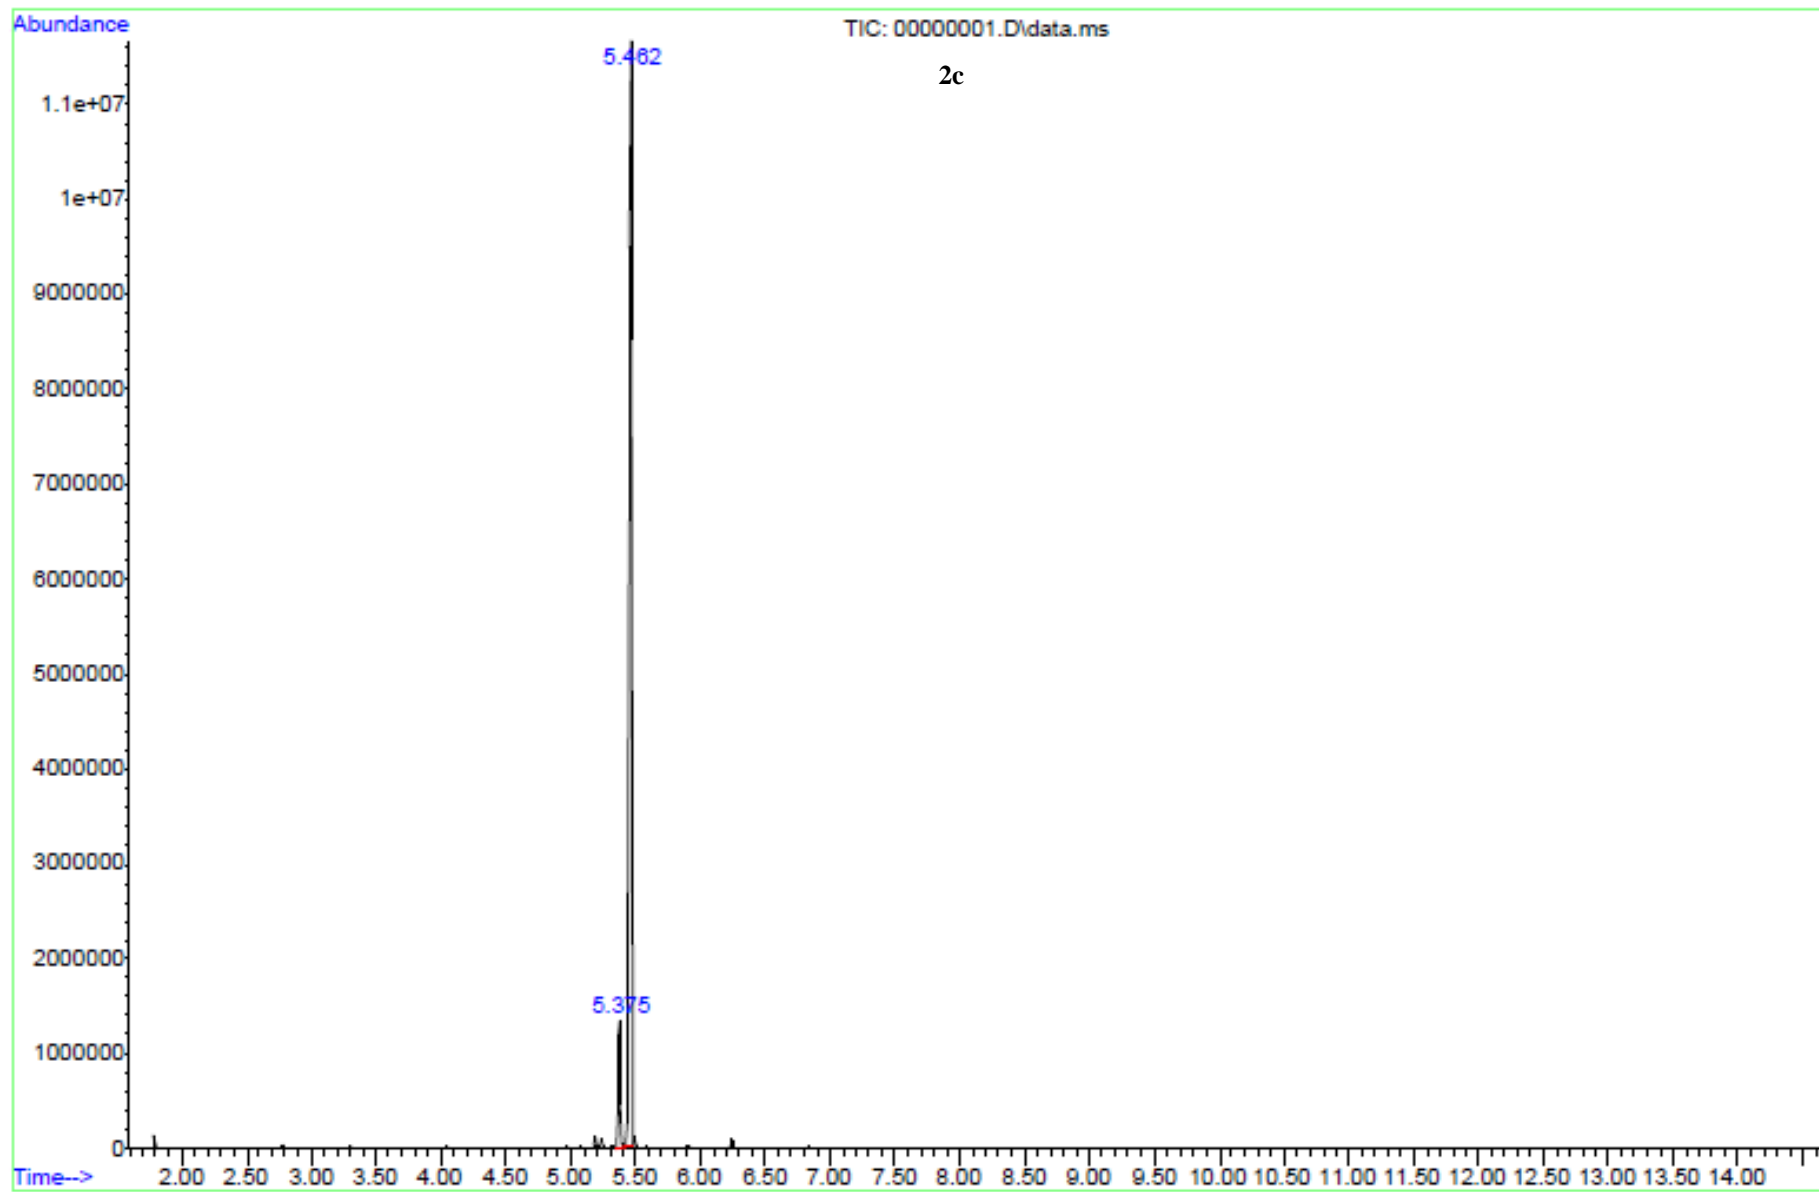

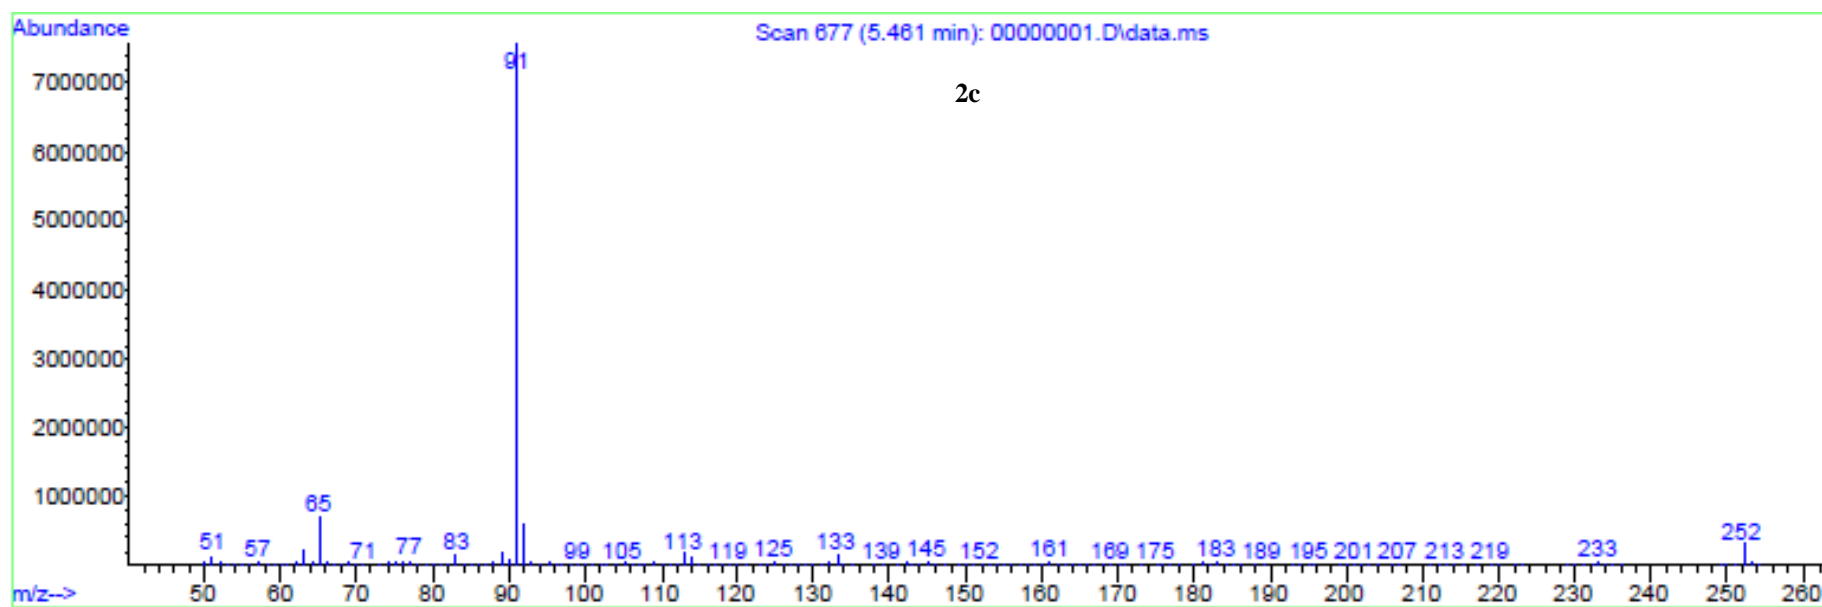

|                       |              |                      |                |                      |         |                        |                     |
|-----------------------|--------------|----------------------|----------------|----------------------|---------|------------------------|---------------------|
| Frequency (MHz)       | 400.40       | Nucleus              | 1H             | Number of Transients | 16      | Origin                 | Bruker BioSpin GmbH |
| Original Points Count | 32768        | Owner                | tibbe_operator | Points Count         | 32768   | SW(cyclical) (Hz)      | 7211.32             |
| Solvent               | CHLOROFORM-d | Spectrum Offset (Hz) | 3395.8613      | Sweep Width (Hz)     | 7211.10 | Temperature (degree C) | 27.000              |

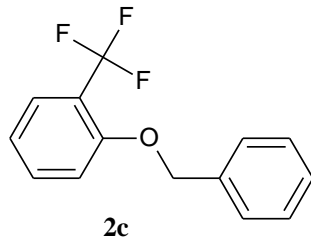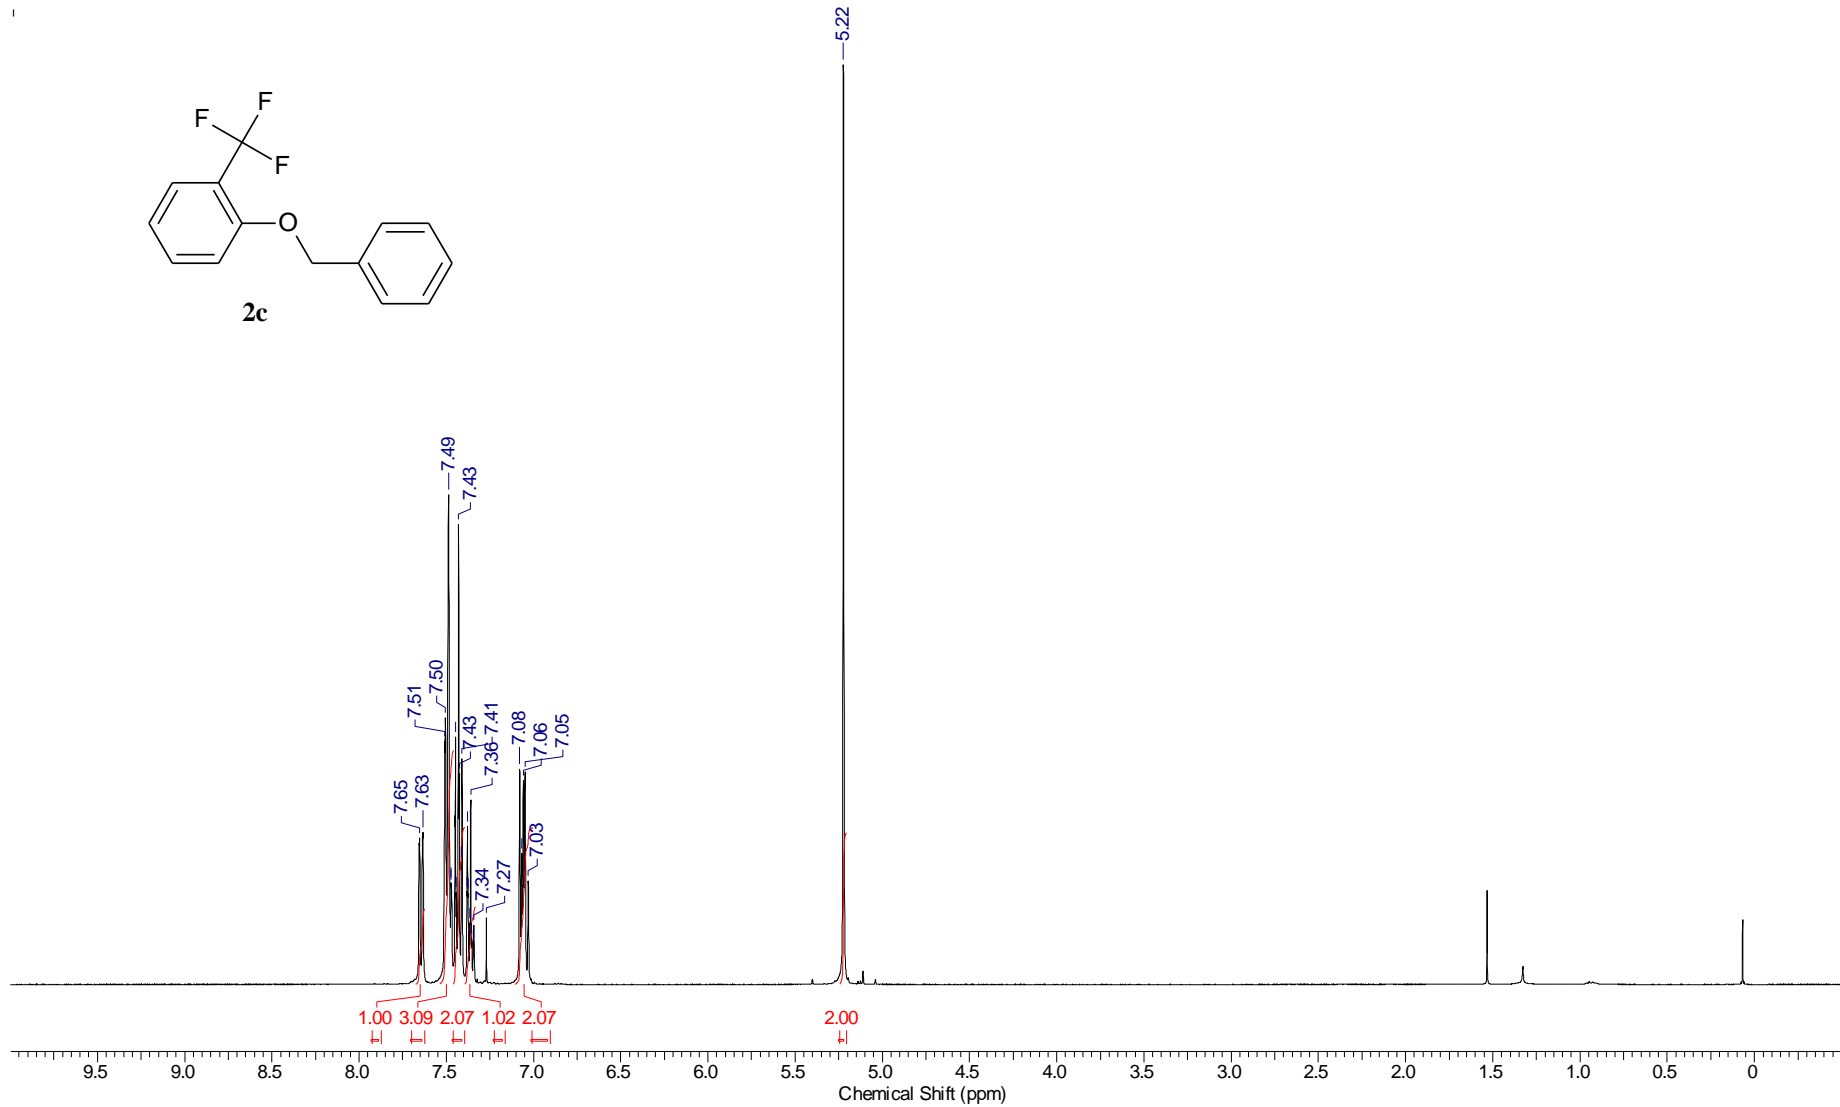

|                       |              |                      |                |                      |          |                        |                     |
|-----------------------|--------------|----------------------|----------------|----------------------|----------|------------------------|---------------------|
| Frequency (MHz)       | 100.69       | Nucleus              | 13C            | Number of Transients | 1024     | Origin                 | Bruker BioSpin GmbH |
| Original Points Count | 32768        | Owner                | tibbe_operator | Points Count         | 32768    | SW(cyclical) (Hz)      | 24037.73            |
| Solvent               | CHLOROFORM-d | Spectrum Offset (Hz) | 10062.1084     | Sweep Width (Hz)     | 24036.99 | Temperature (degree C) | 27.000              |

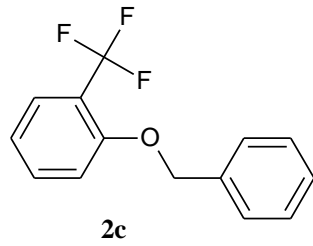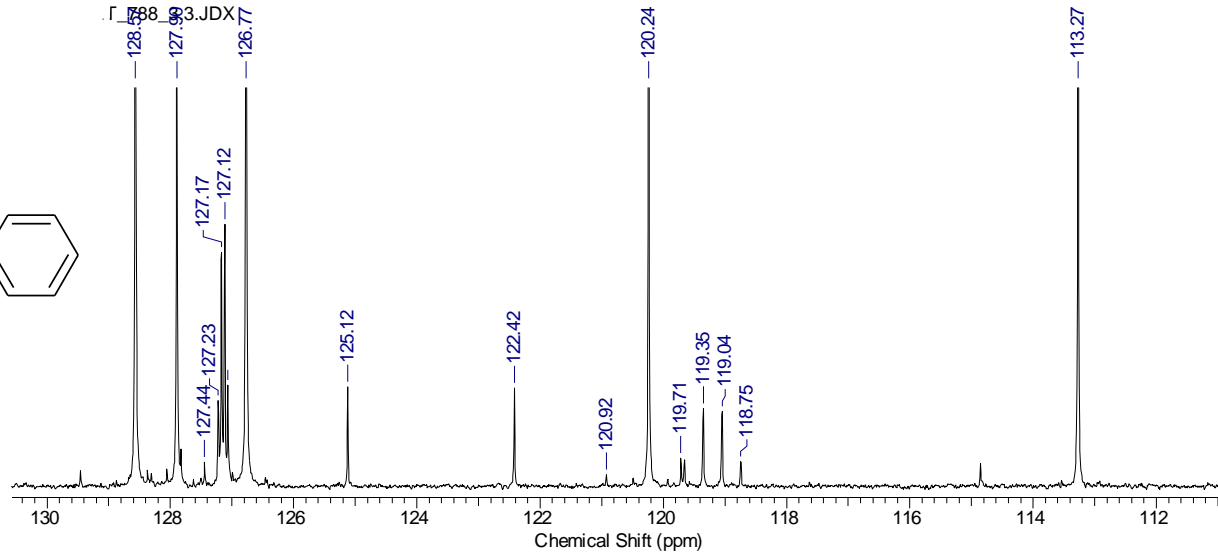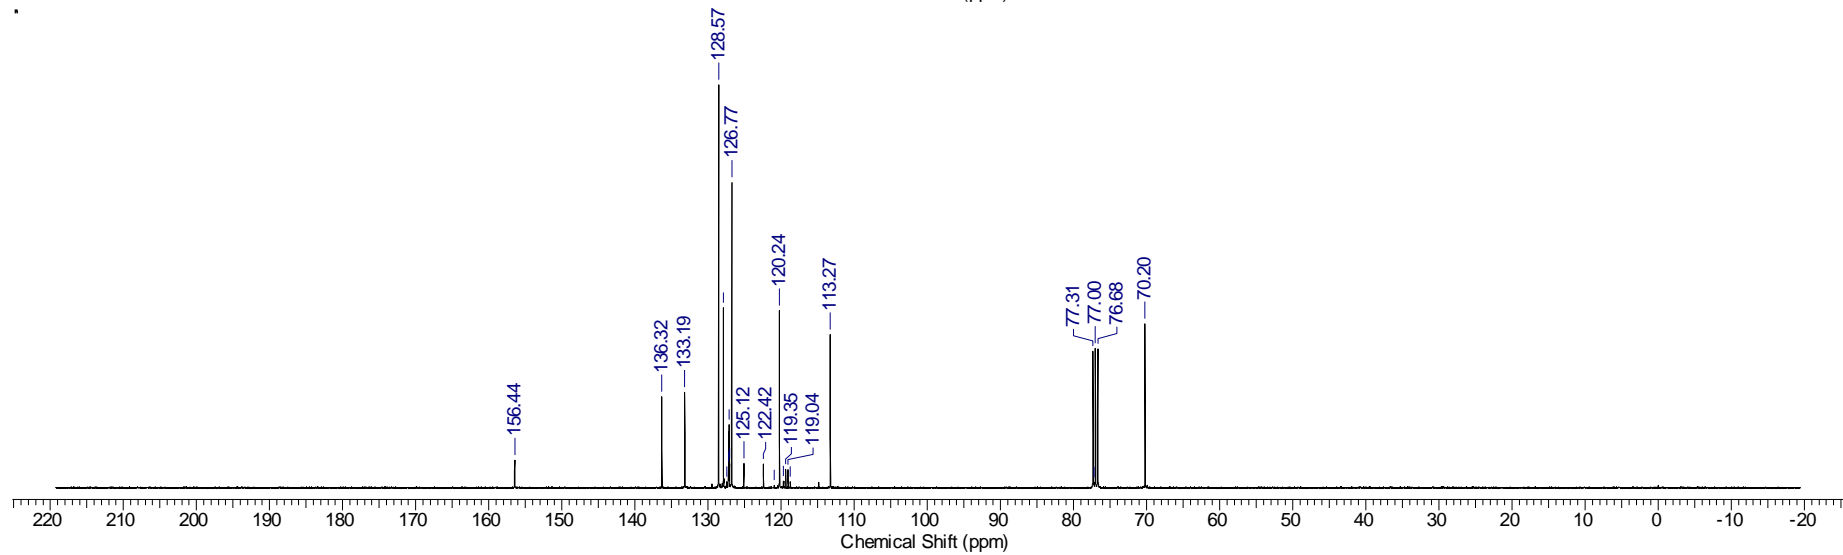

|                              |              |                             |                          |                             |          |                               |                     |
|------------------------------|--------------|-----------------------------|--------------------------|-----------------------------|----------|-------------------------------|---------------------|
| <b>Frequency (MHz)</b>       | 100.69       | <b>Nucleus</b>              | <sup>13</sup> C Dent 135 | <b>Number of Transients</b> | 256      | <b>Origin</b>                 | Bruker BioSpin GmbH |
| <b>Original Points Count</b> | 32768        | <b>Owner</b>                | tibbe_operator           | <b>Points Count</b>         | 32768    | <b>SW(cyclical) (Hz)</b>      | 24037.73            |
| <b>Solvent</b>               | CHLOROFORM-d | <b>Spectrum Offset (Hz)</b> | 10061.8350               | <b>Sweep Width (Hz)</b>     | 24036.99 | <b>Temperature (degree C)</b> | 27.000              |

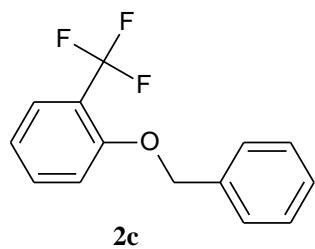

8\_584.JDX

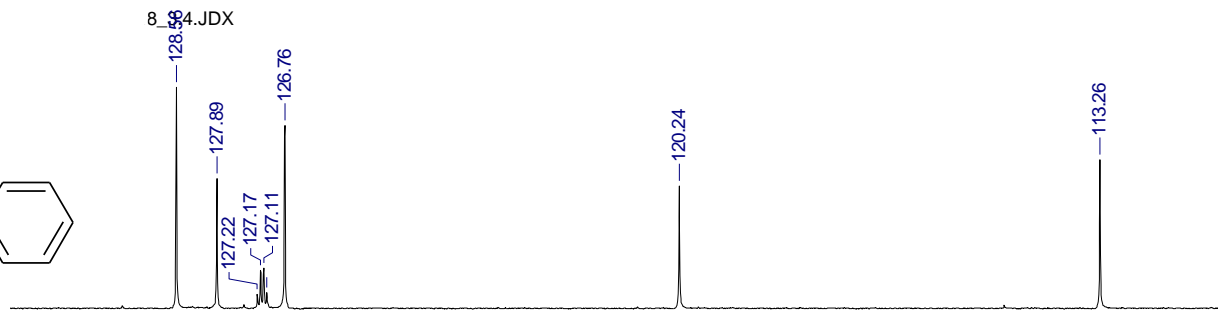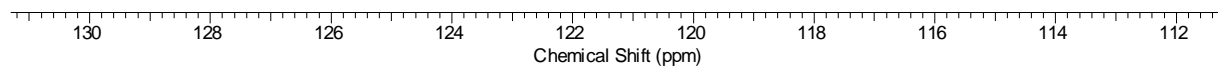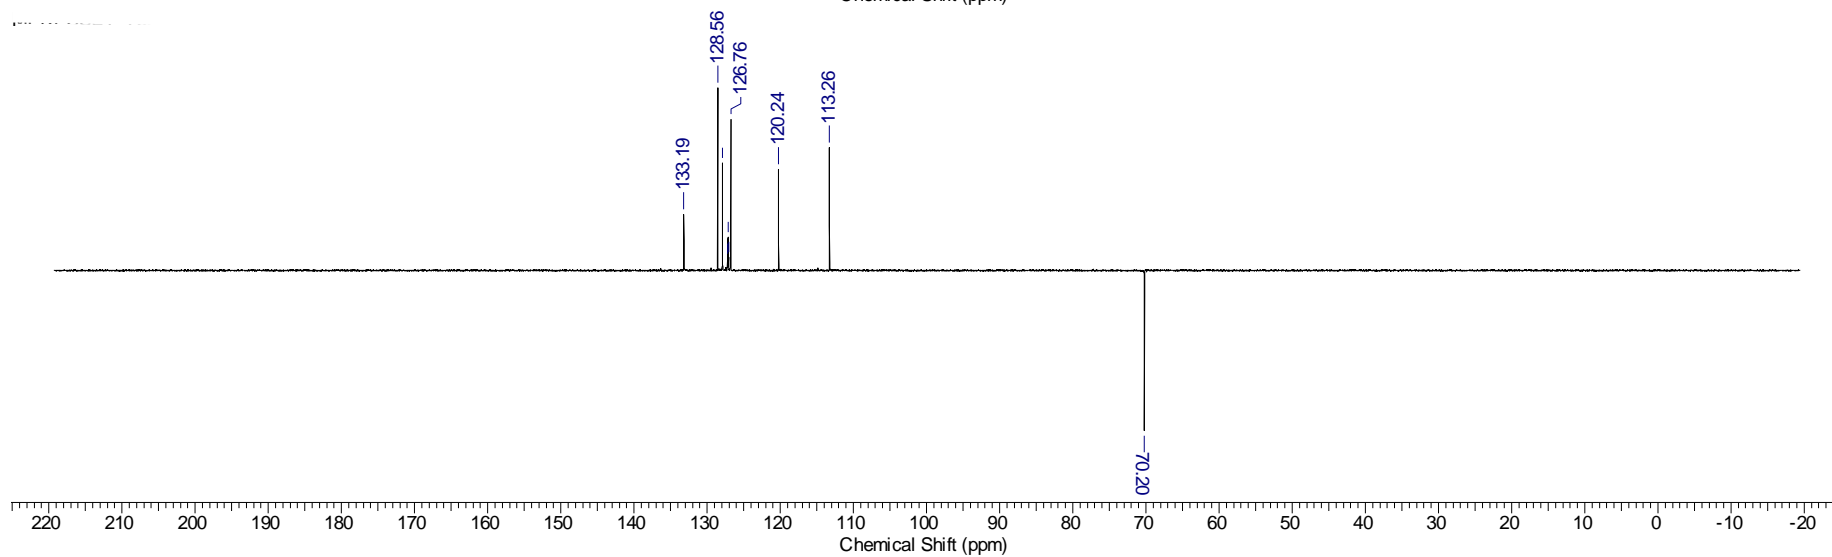

|                              |              |                             |                |                             |          |                               |                     |
|------------------------------|--------------|-----------------------------|----------------|-----------------------------|----------|-------------------------------|---------------------|
| <b>Frequency (MHz)</b>       | 376.71       | <b>Nucleus</b>              | 19F            | <b>Number of Transients</b> | 64       | <b>Origin</b>                 | Bruker BioSpin GmbH |
| <b>Original Points Count</b> | 131072       | <b>Owner</b>                | tibbe_operator | <b>Points Count</b>         | 131072   | <b>SW(cyclical) (Hz)</b>      | 93749.28            |
| <b>Solvent</b>               | CHLOROFORM-d | <b>Spectrum Offset (Hz)</b> | -37730.1992    | <b>Sweep Width (Hz)</b>     | 93748.56 | <b>Temperature (degree C)</b> | 27.000              |

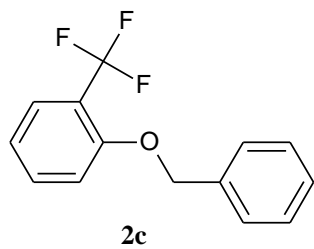

-62.33

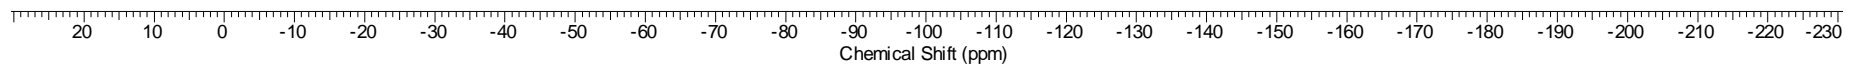

|                       |              |                      |                 |                      |          |                        |                     |
|-----------------------|--------------|----------------------|-----------------|----------------------|----------|------------------------|---------------------|
| Frequency (MHz)       | 376.71       | Nucleus              | <sup>19</sup> F | Number of Transients | 64       | Origin                 | Bruker BioSpin GmbH |
| Original Points Count | 131072       | Owner                | tibbe_operator  | Points Count         | 131072   | SW(cyclical) (Hz)      | 89285.03            |
| Solvent               | CHLOROFORM-d | Spectrum Offset (Hz) | -37375.7539     | Sweep Width (Hz)     | 89284.35 | Temperature (degree C) | 27.000              |

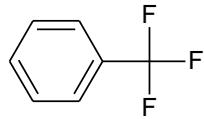

2d

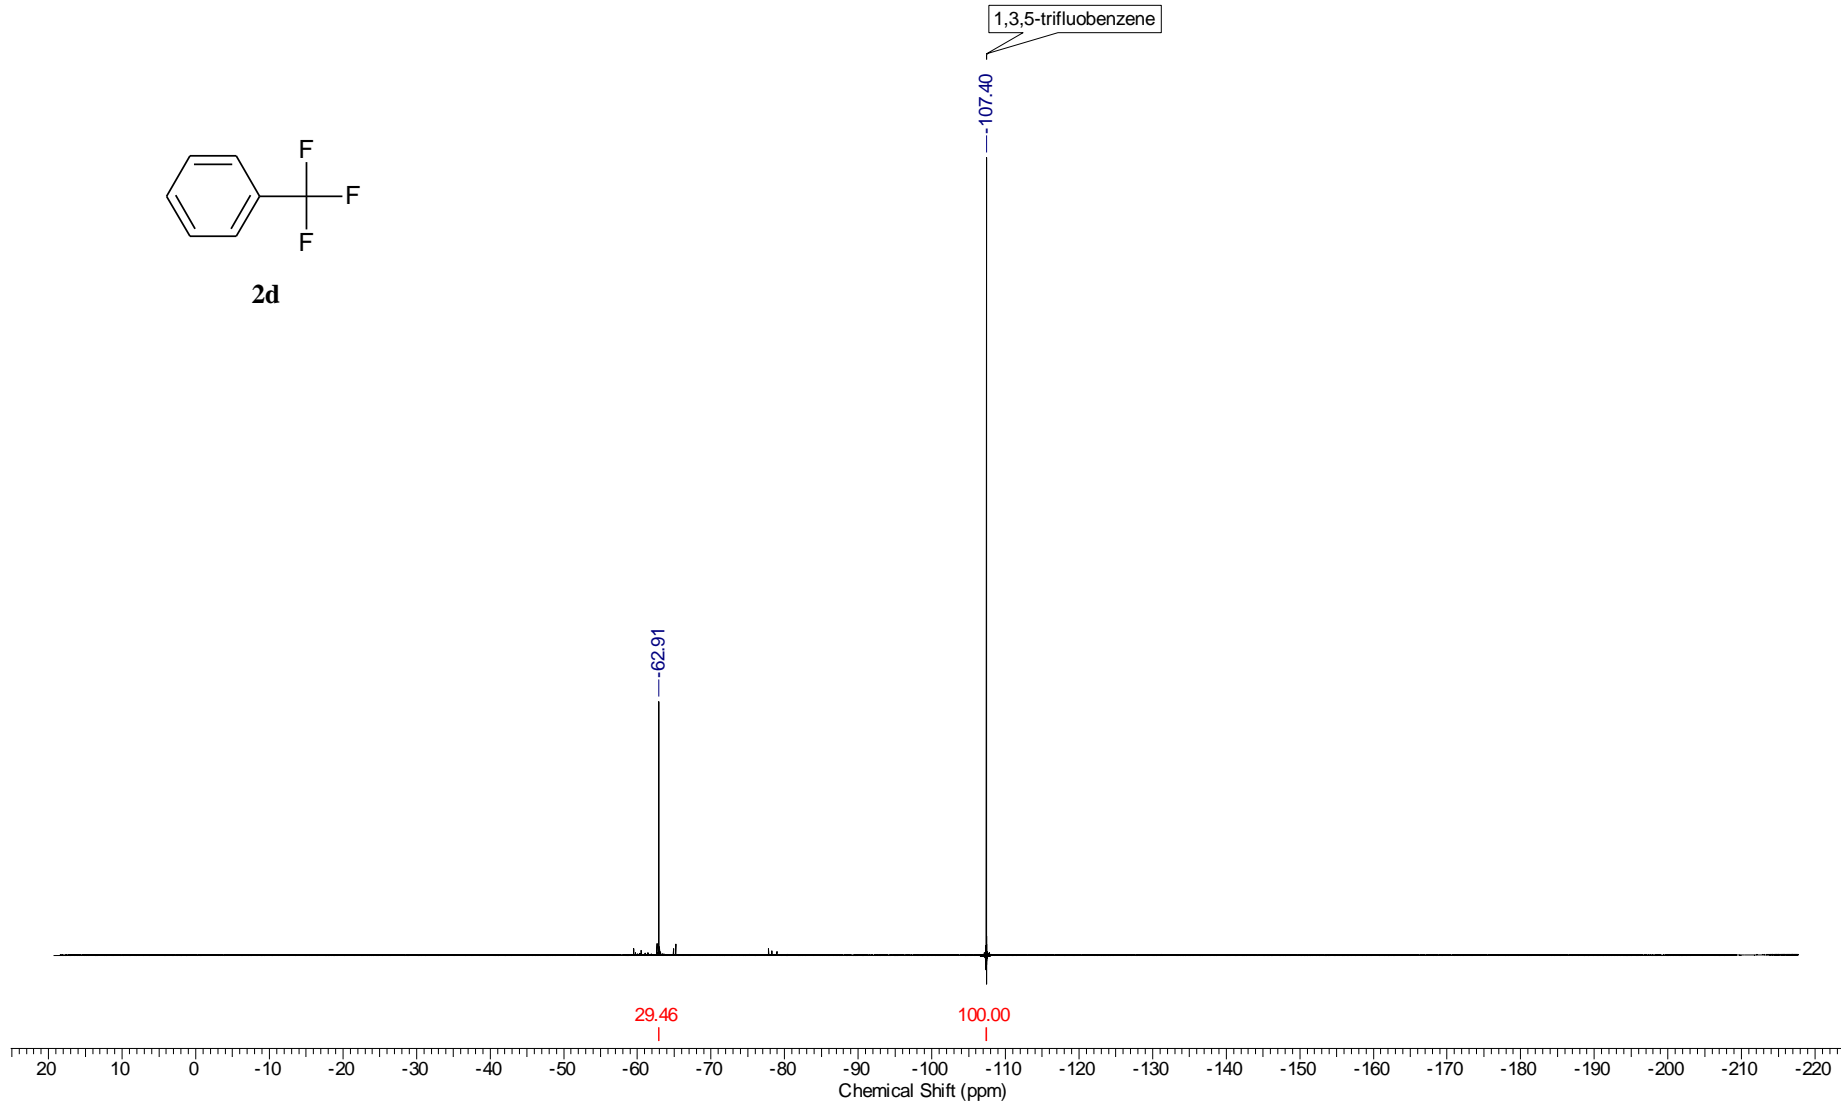

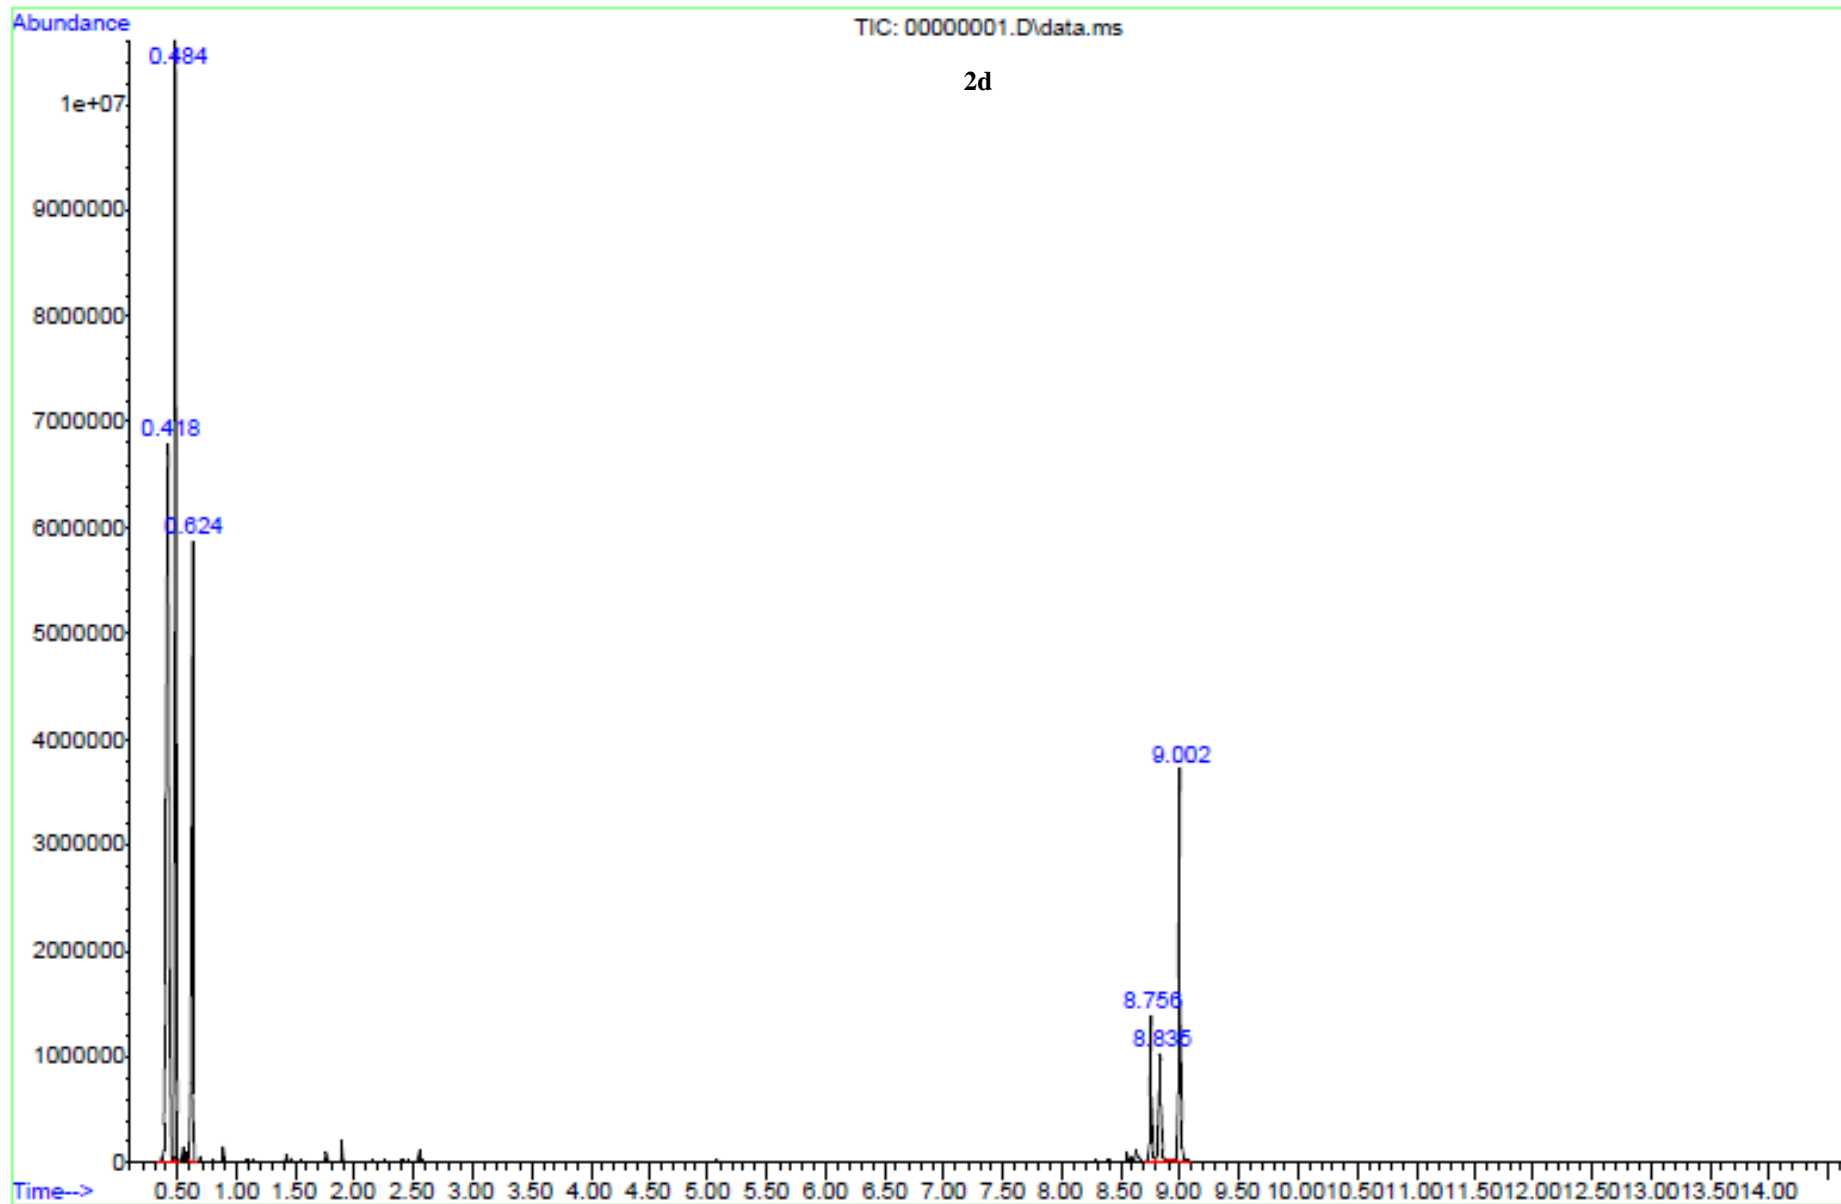



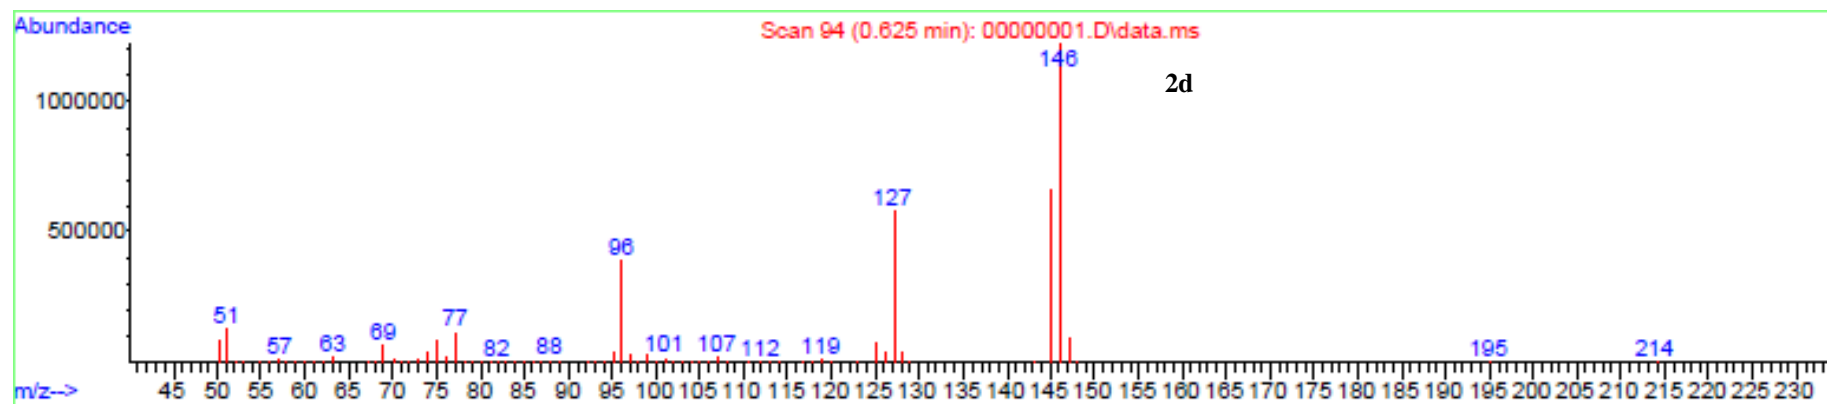

|                       |              |                      |                 |                      |          |                        |                     |
|-----------------------|--------------|----------------------|-----------------|----------------------|----------|------------------------|---------------------|
| Frequency (MHz)       | 376.71       | Nucleus              | <sup>19</sup> F | Number of Transients | 64       | Origin                 | Bruker BioSpin GmbH |
| Original Points Count | 131072       | Owner                | tibbe_operator  | Points Count         | 131072   | SW(cyclical) (Hz)      | 93749.28            |
| Solvent               | CHLOROFORM-d | Spectrum Offset (Hz) | -37277.3711     | Sweep Width (Hz)     | 93748.56 | Temperature (degree C) | 27.000              |

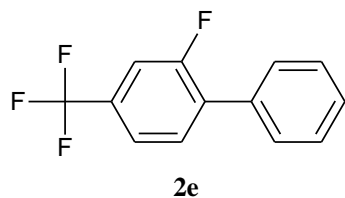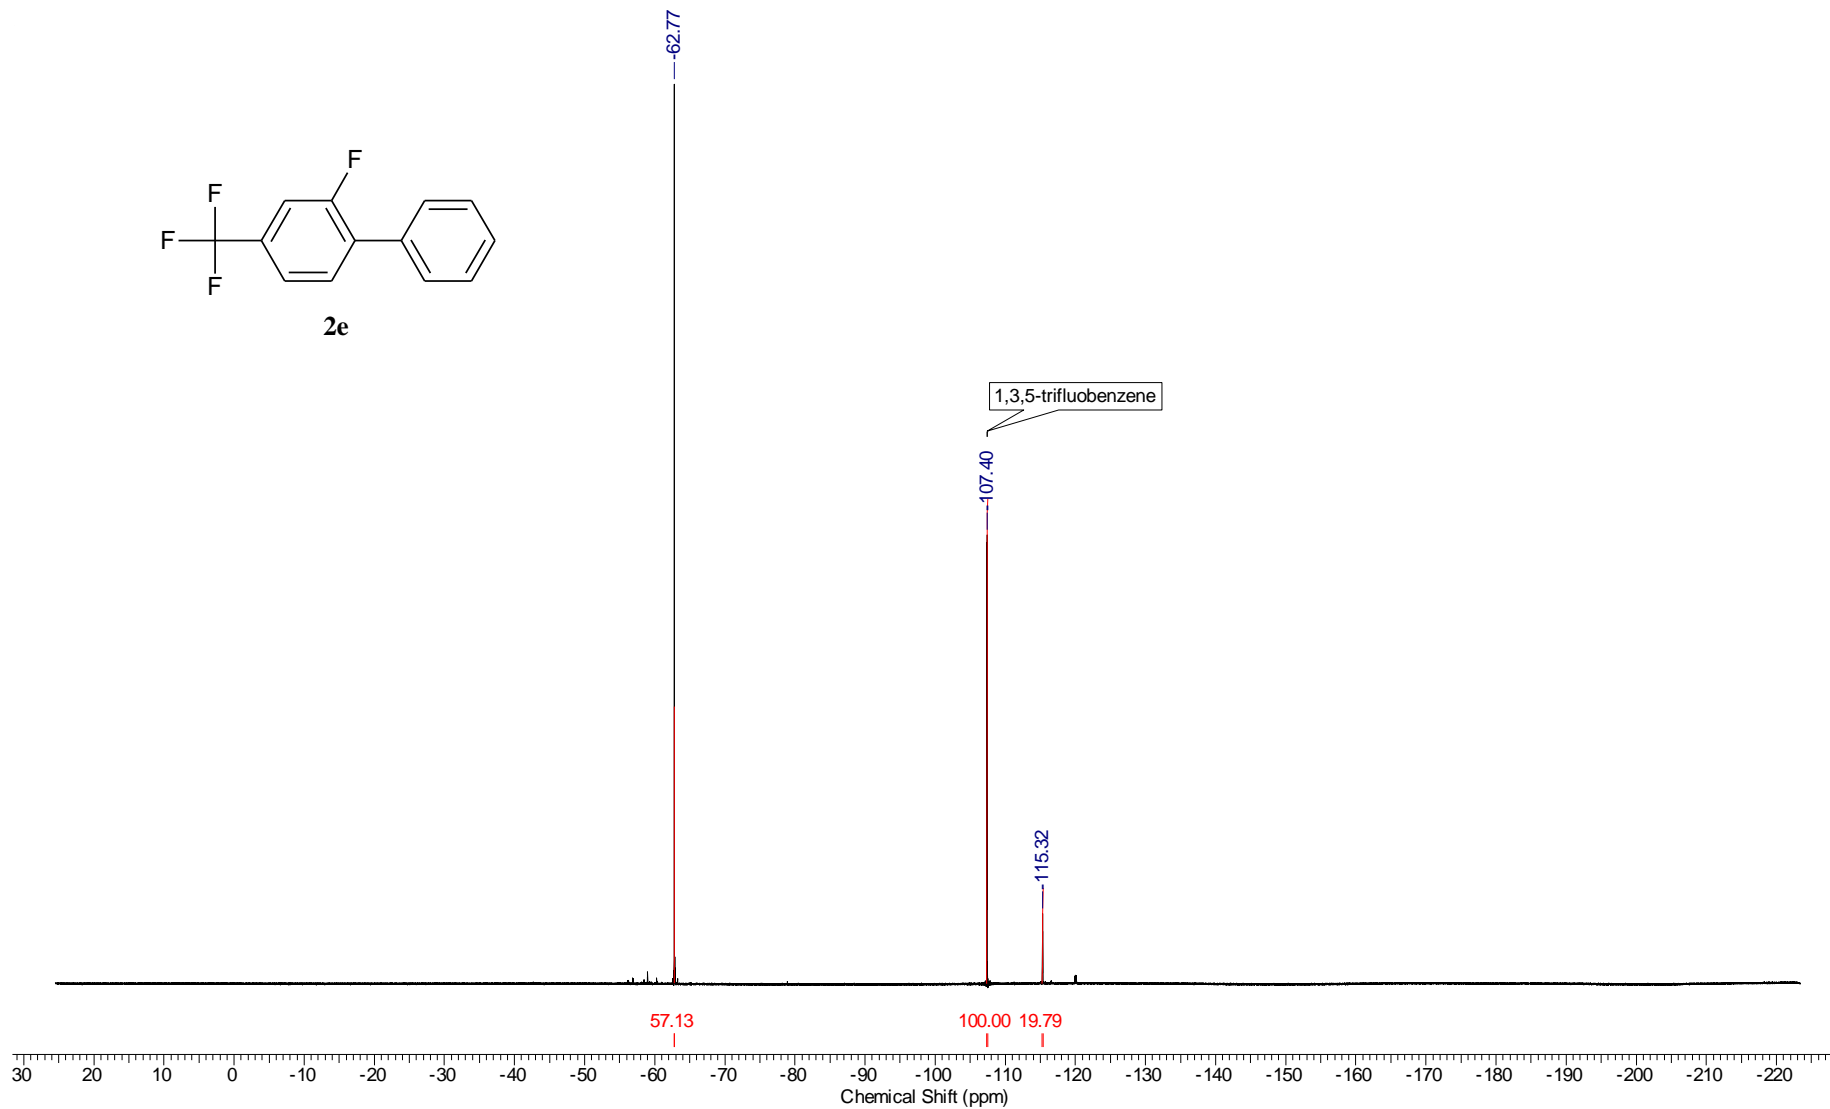

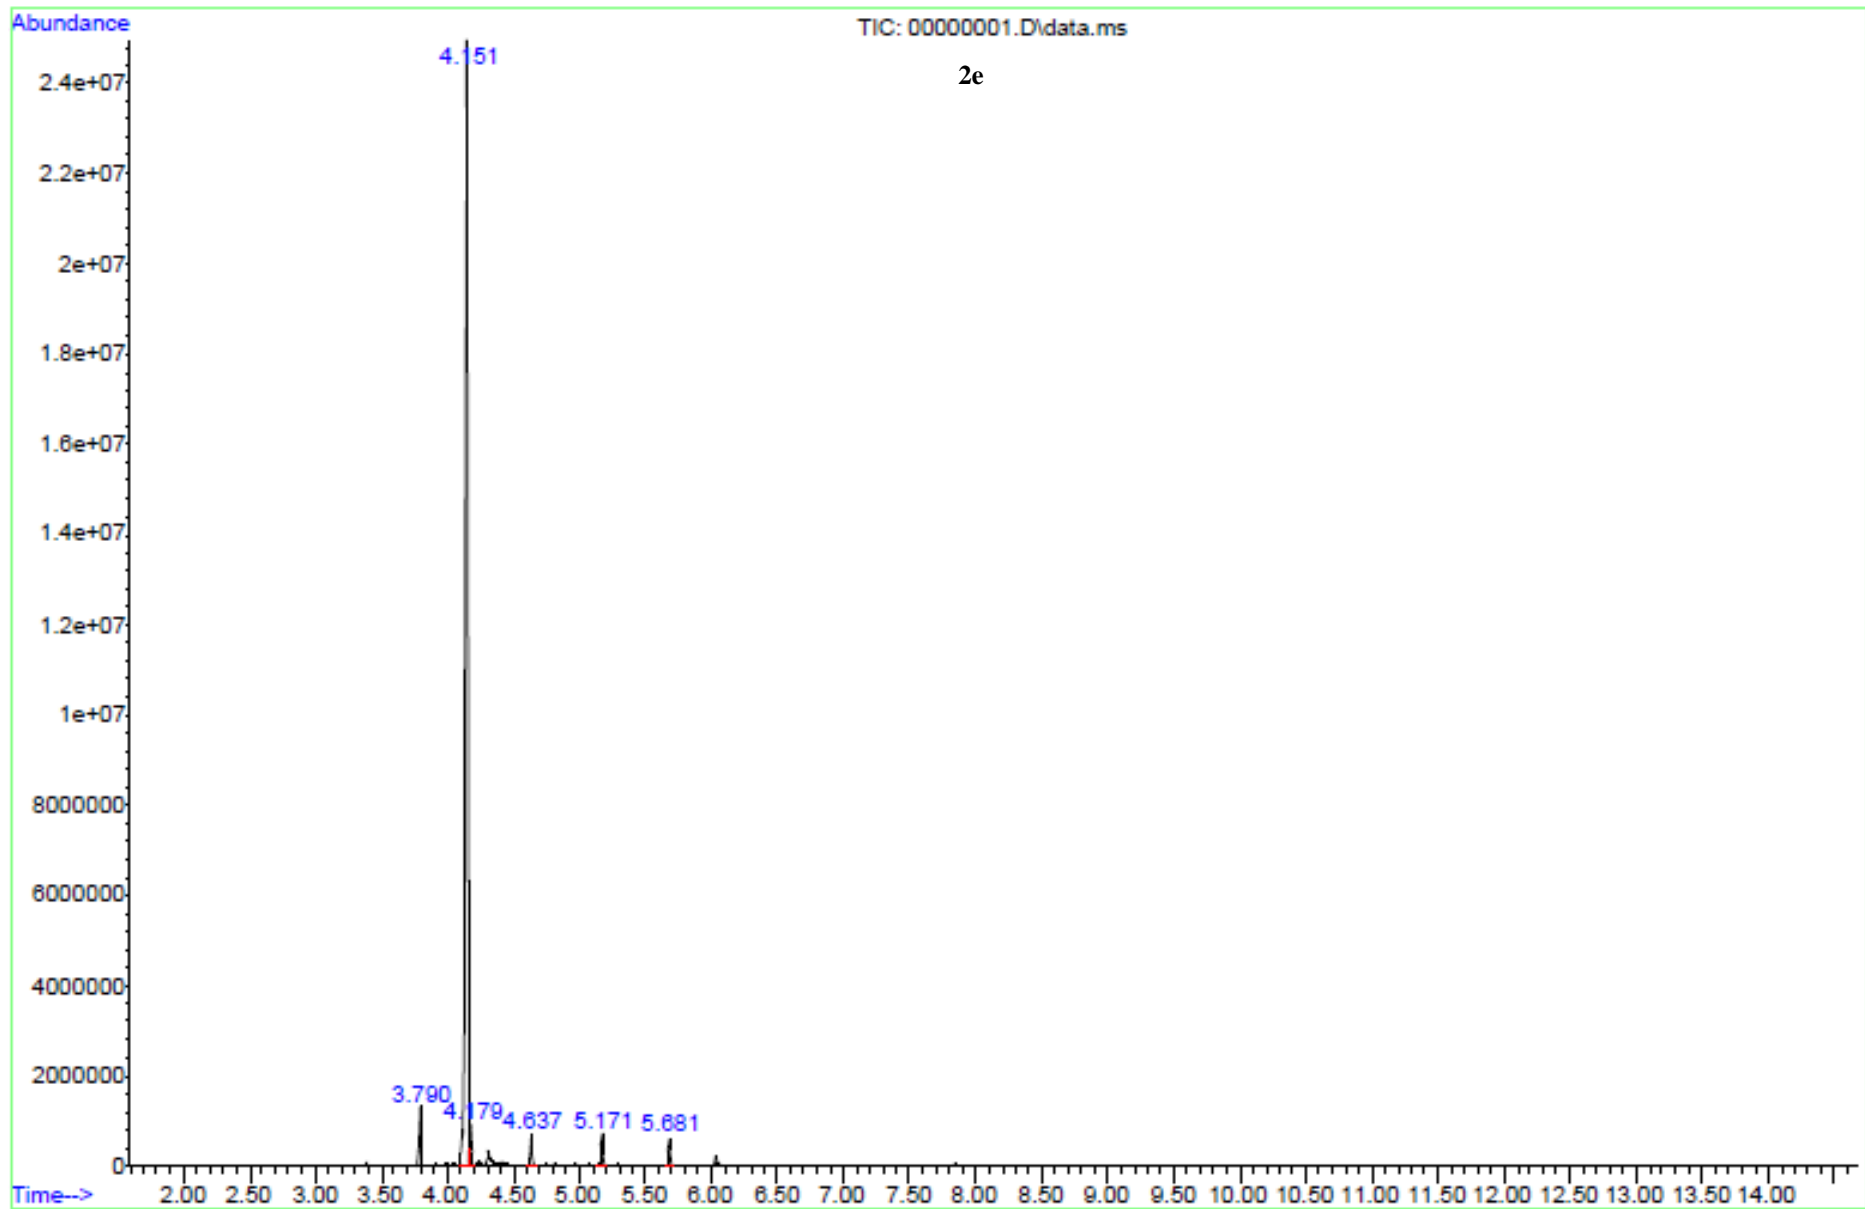

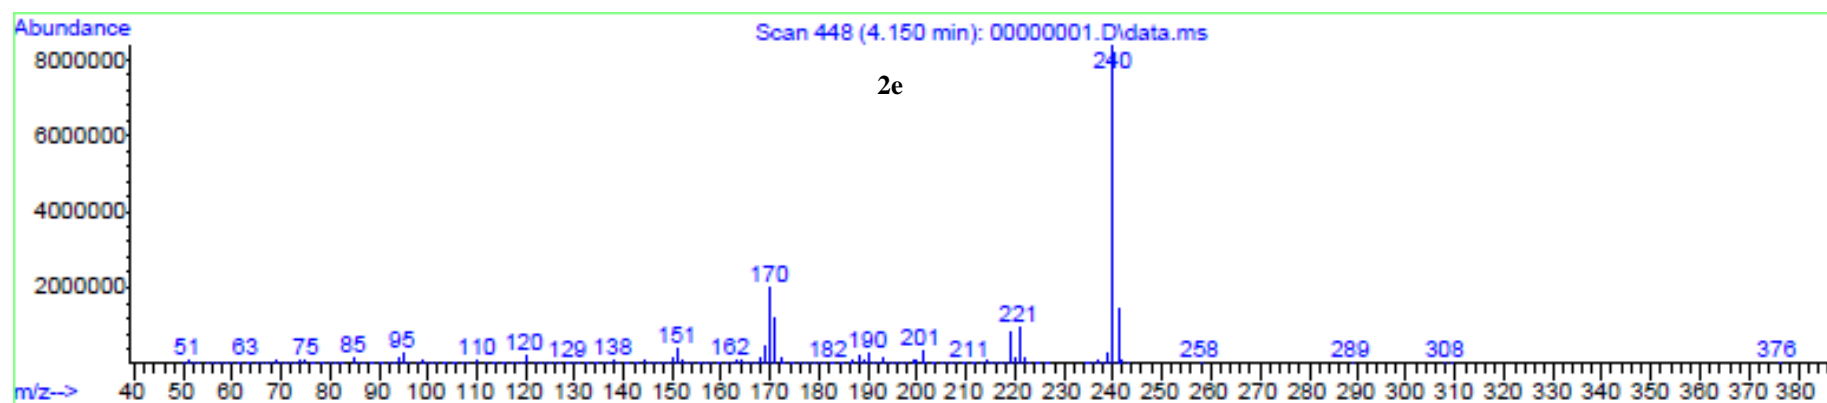

|                       |              |                      |                |                      |         |                        |                     |
|-----------------------|--------------|----------------------|----------------|----------------------|---------|------------------------|---------------------|
| Frequency (MHz)       | 400.40       | Nucleus              | 1H             | Number of Transients | 16      | Origin                 | Bruker BioSpin GmbH |
| Original Points Count | 32768        | Owner                | tibbe_operator | Points Count         | 32768   | SW(cyclical) (Hz)      | 7211.32             |
| Solvent               | CHLOROFORM-d | Spectrum Offset (Hz) | 3395.6414      | Sweep Width (Hz)     | 7211.10 | Temperature (degree C) | 27.000              |

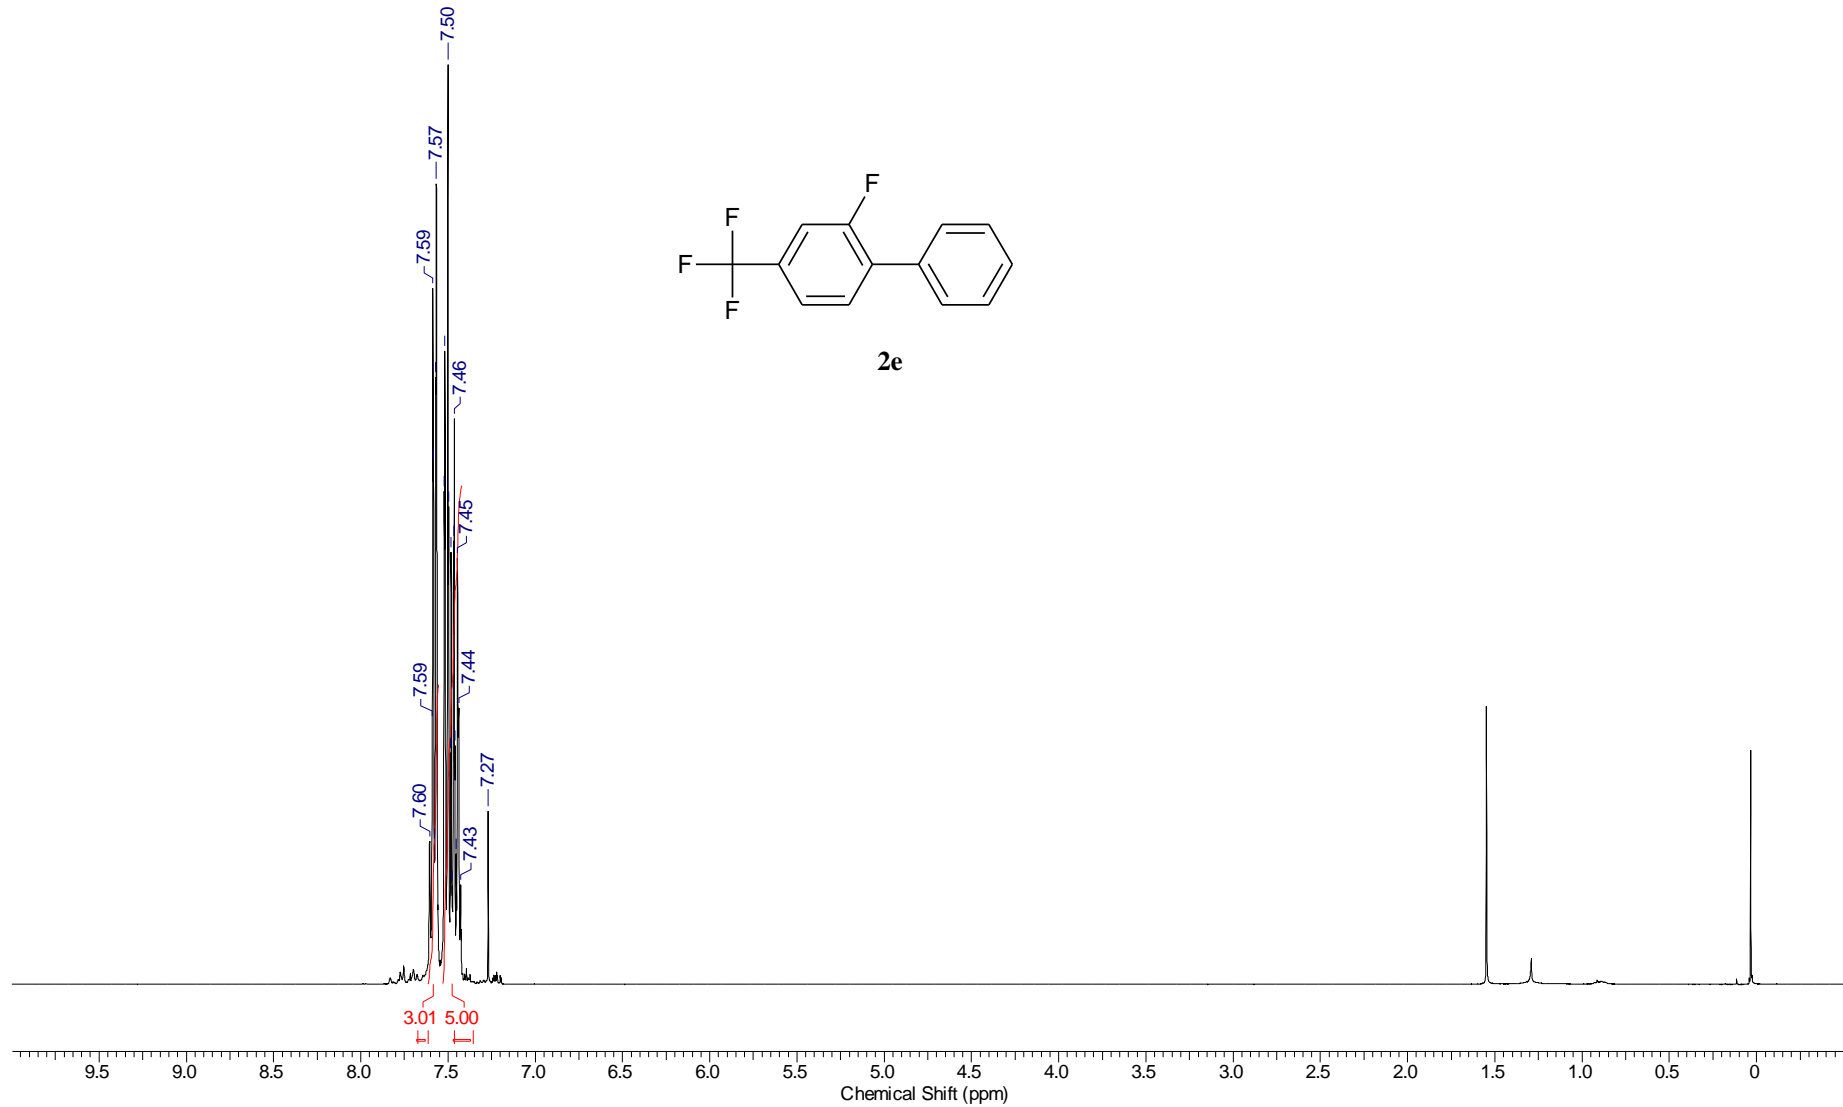

|                              |              |                             |                 |                             |          |                               |                     |
|------------------------------|--------------|-----------------------------|-----------------|-----------------------------|----------|-------------------------------|---------------------|
| <b>Frequency (MHz)</b>       | 100.69       | <b>Nucleus</b>              | <sup>13</sup> C | <b>Number of Transients</b> | 1024     | <b>Origin</b>                 | Bruker BioSpin GmbH |
| <b>Original Points Count</b> | 32768        | <b>Owner</b>                | tibbe_operator  | <b>Points Count</b>         | 32768    | <b>SW(cyclical) (Hz)</b>      | 24037.73            |
| <b>Solvent</b>               | CHLOROFORM-d | <b>Spectrum Offset (Hz)</b> | 10066.5088      | <b>Sweep Width (Hz)</b>     | 24036.99 | <b>Temperature (degree C)</b> | 27.000              |

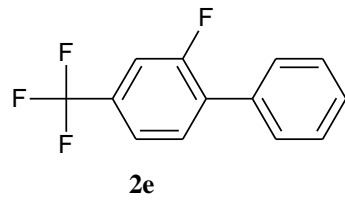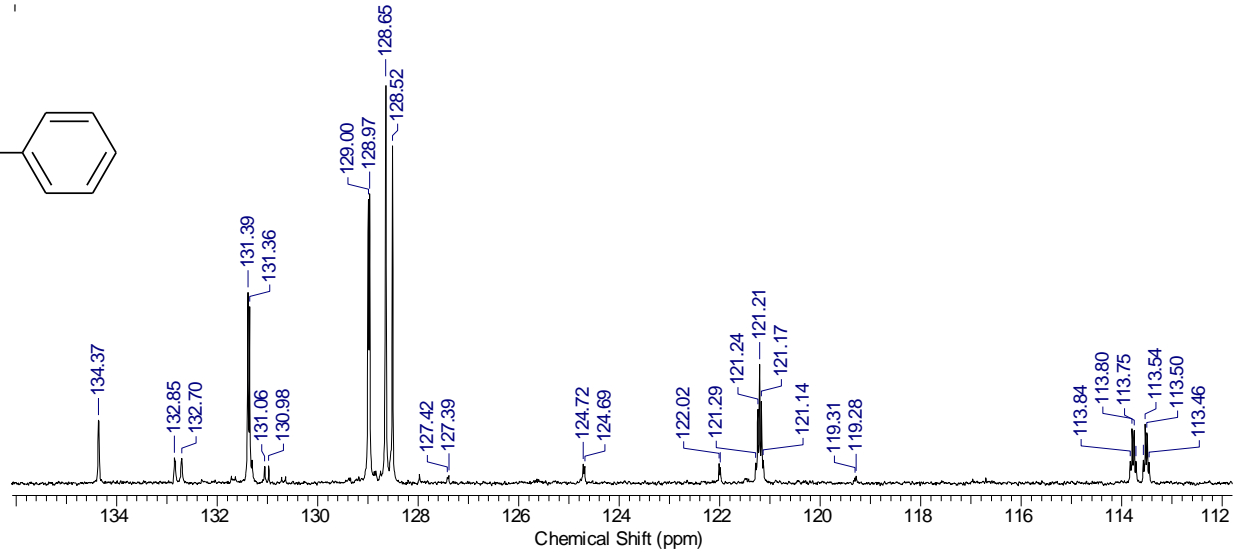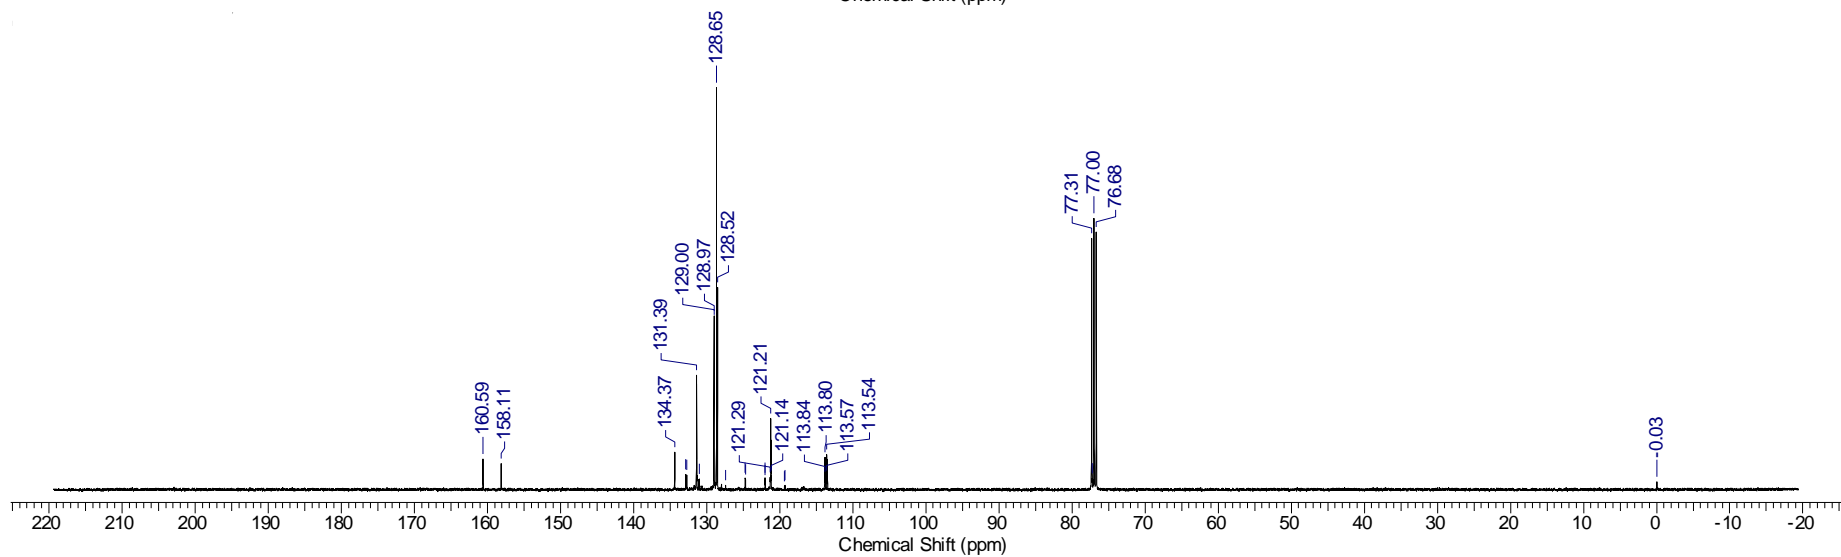

|                              |              |                             |                          |                             |          |                               |                     |
|------------------------------|--------------|-----------------------------|--------------------------|-----------------------------|----------|-------------------------------|---------------------|
| <b>Frequency (MHz)</b>       | 100.69       | <b>Nucleus</b>              | <sup>13</sup> C Dept 135 | <b>Number of Transients</b> | 256      | <b>Origin</b>                 | Bruker BioSpin GmbH |
| <b>Original Points Count</b> | 32768        | <b>Owner</b>                | tibbe_operator           | <b>Points Count</b>         | 32768    | <b>SW(cyclical) (Hz)</b>      | 24037.73            |
| <b>Solvent</b>               | CHLOROFORM-d | <b>Spectrum Offset (Hz)</b> | 10066.8838               | <b>Sweep Width (Hz)</b>     | 24036.99 | <b>Temperature (degree C)</b> | 27.000              |

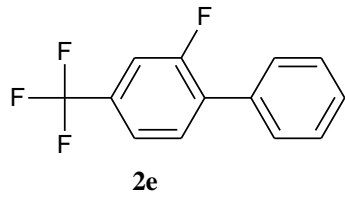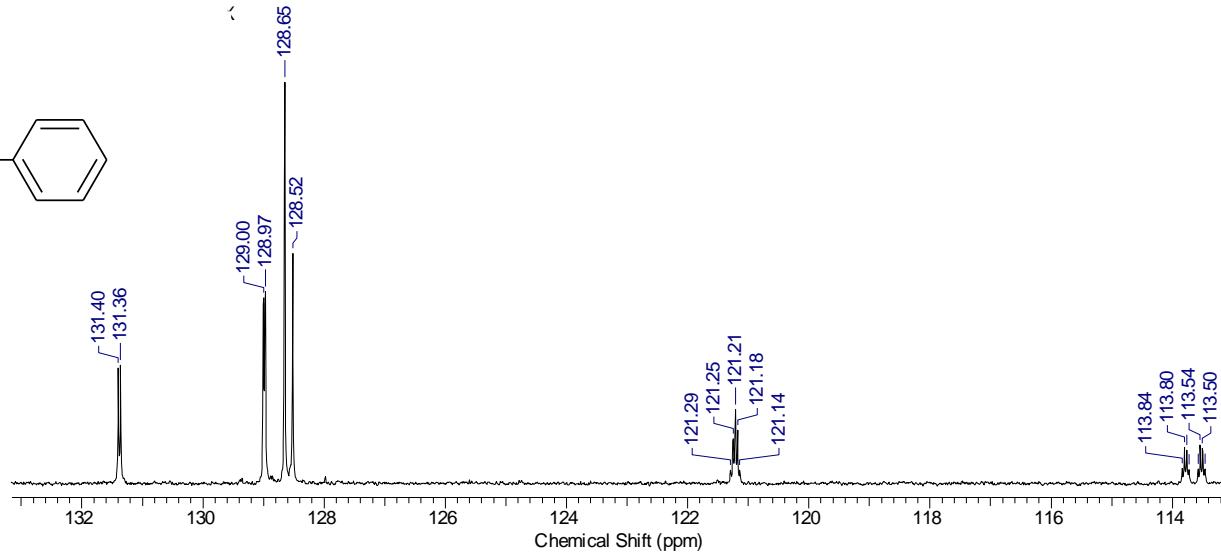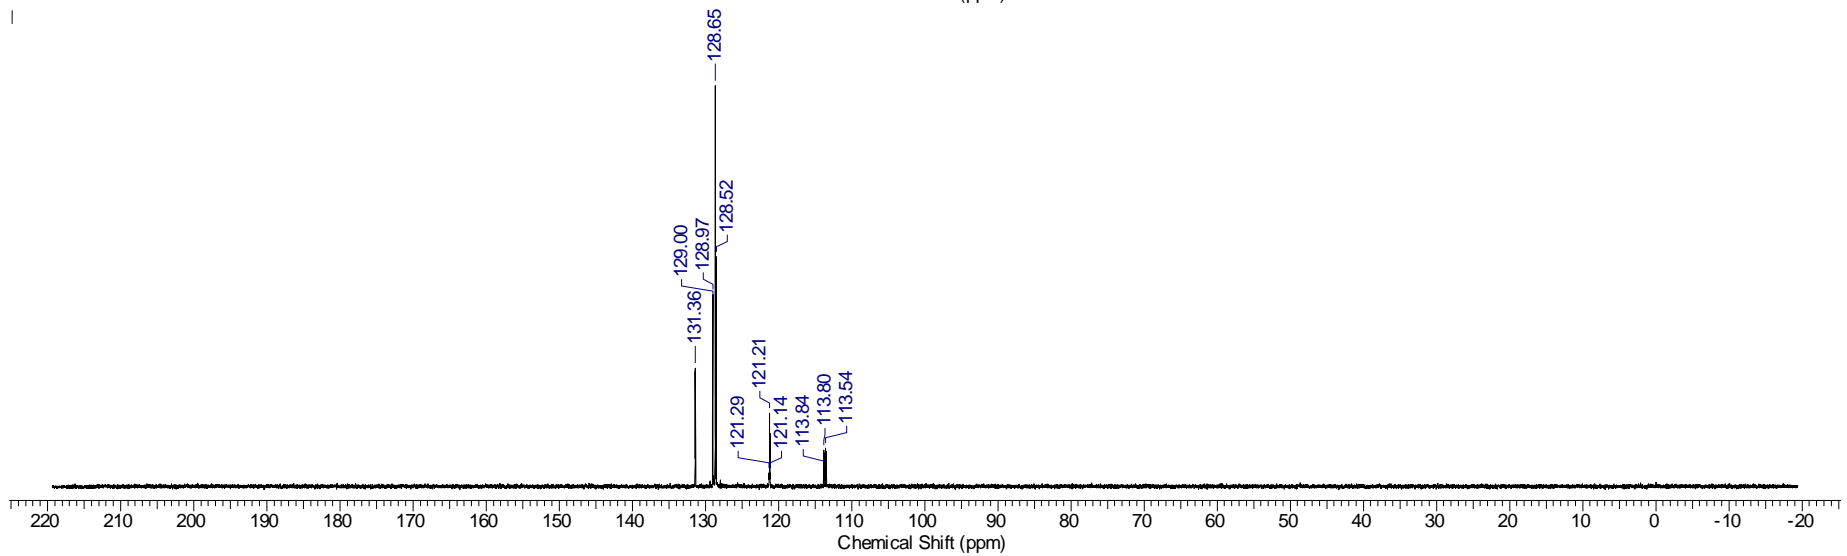

|                       |              |                      |                 |                      |          |                        |                     |
|-----------------------|--------------|----------------------|-----------------|----------------------|----------|------------------------|---------------------|
| Frequency (MHz)       | 376.71       | Nucleus              | <sup>19</sup> F | Number of Transients | 64       | Origin                 | Bruker BioSpin GmbH |
| Original Points Count | 131072       | Owner                | tibbe_operator  | Points Count         | 131072   | SW(cyclical) (Hz)      | 93749.28            |
| Solvent               | CHLOROFORM-d | Spectrum Offset (Hz) | -37719.2891     | Sweep Width (Hz)     | 93748.56 | Temperature (degree C) | 27.000              |

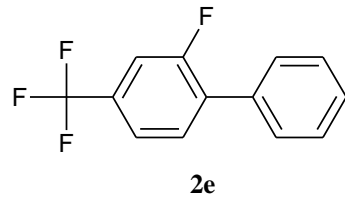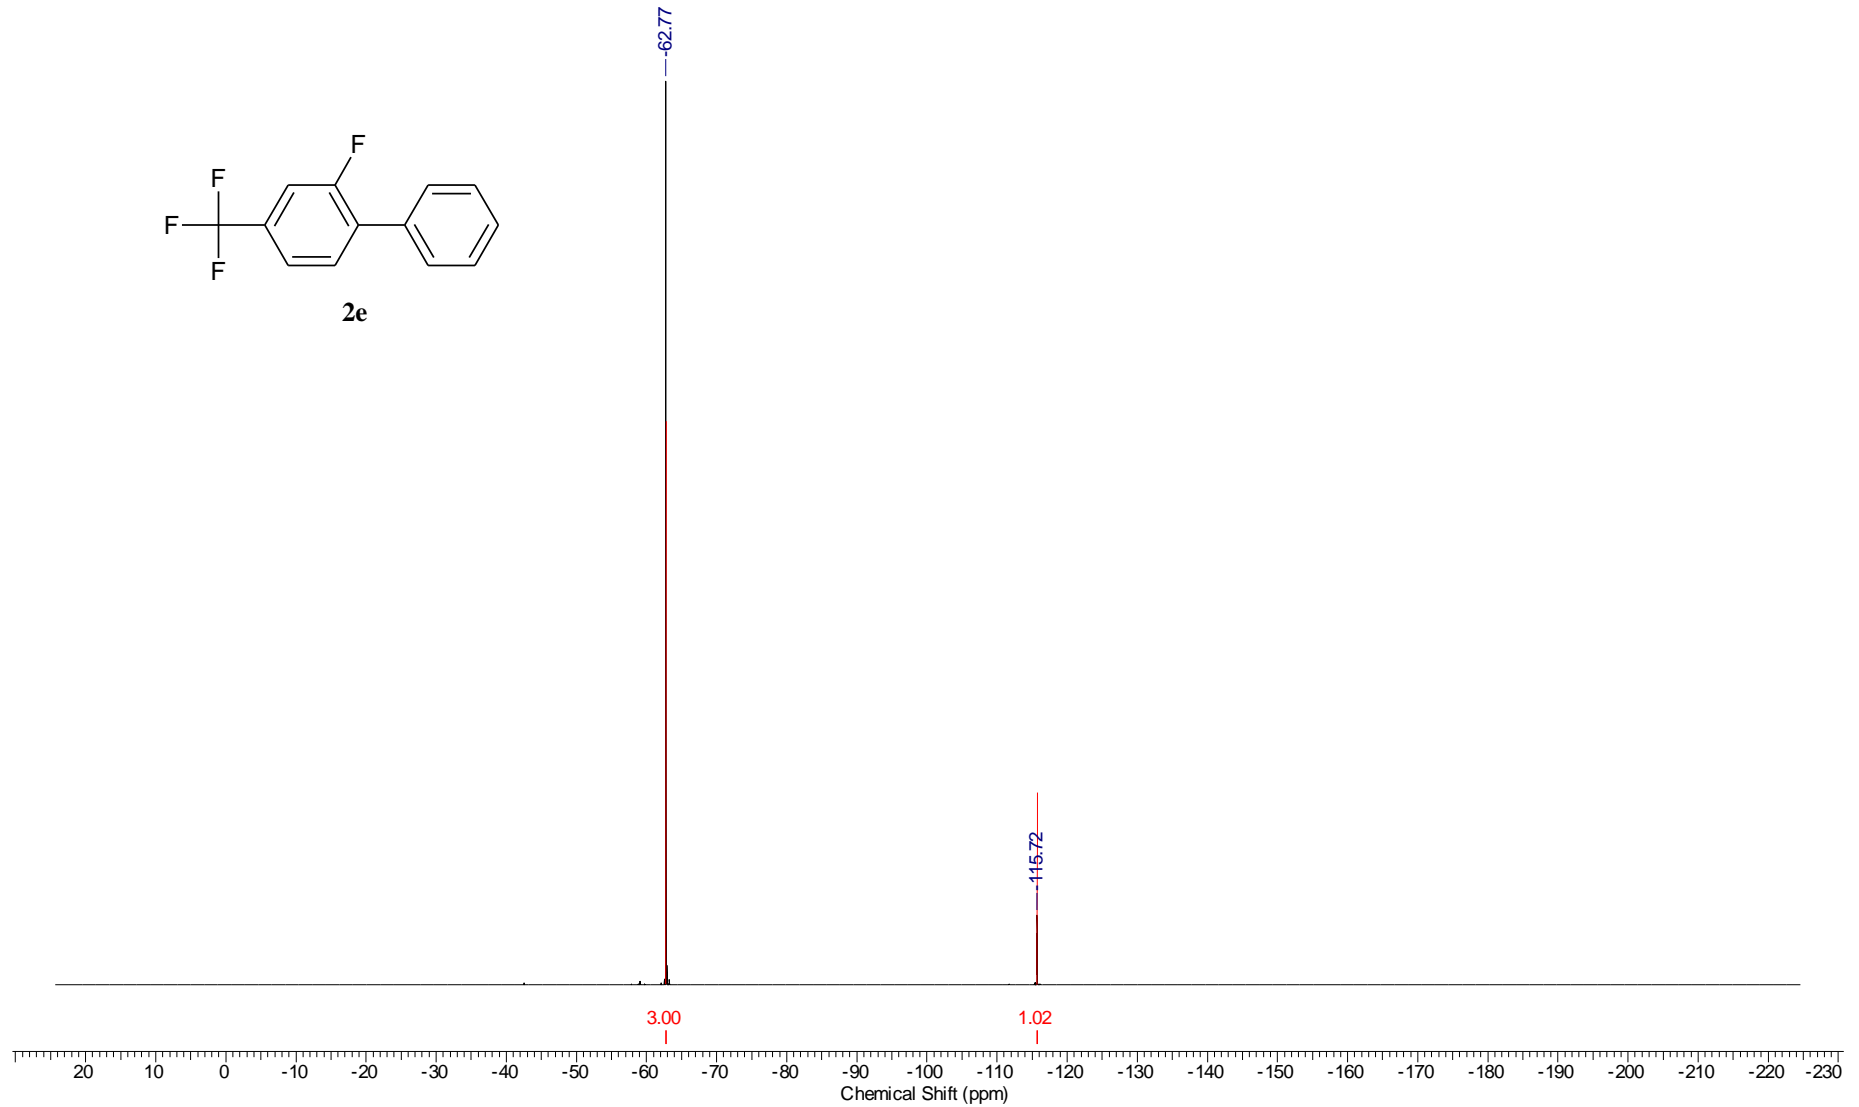



|                       |              |                      |                 |                      |          |                        |                     |
|-----------------------|--------------|----------------------|-----------------|----------------------|----------|------------------------|---------------------|
| Frequency (MHz)       | 376.71       | Nucleus              | <sup>19</sup> F | Number of Transients | 64       | Origin                 | Bruker BioSpin GmbH |
| Original Points Count | 131072       | Owner                | tibbe_operator  | Points Count         | 131072   | SW(cyclical) (Hz)      | 93749.28            |
| Solvent               | CHLOROFORM-d | Spectrum Offset (Hz) | -37238.0313     | Sweep Width (Hz)     | 93748.56 | Temperature (degree C) | 27.000              |

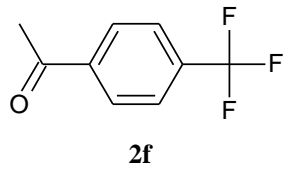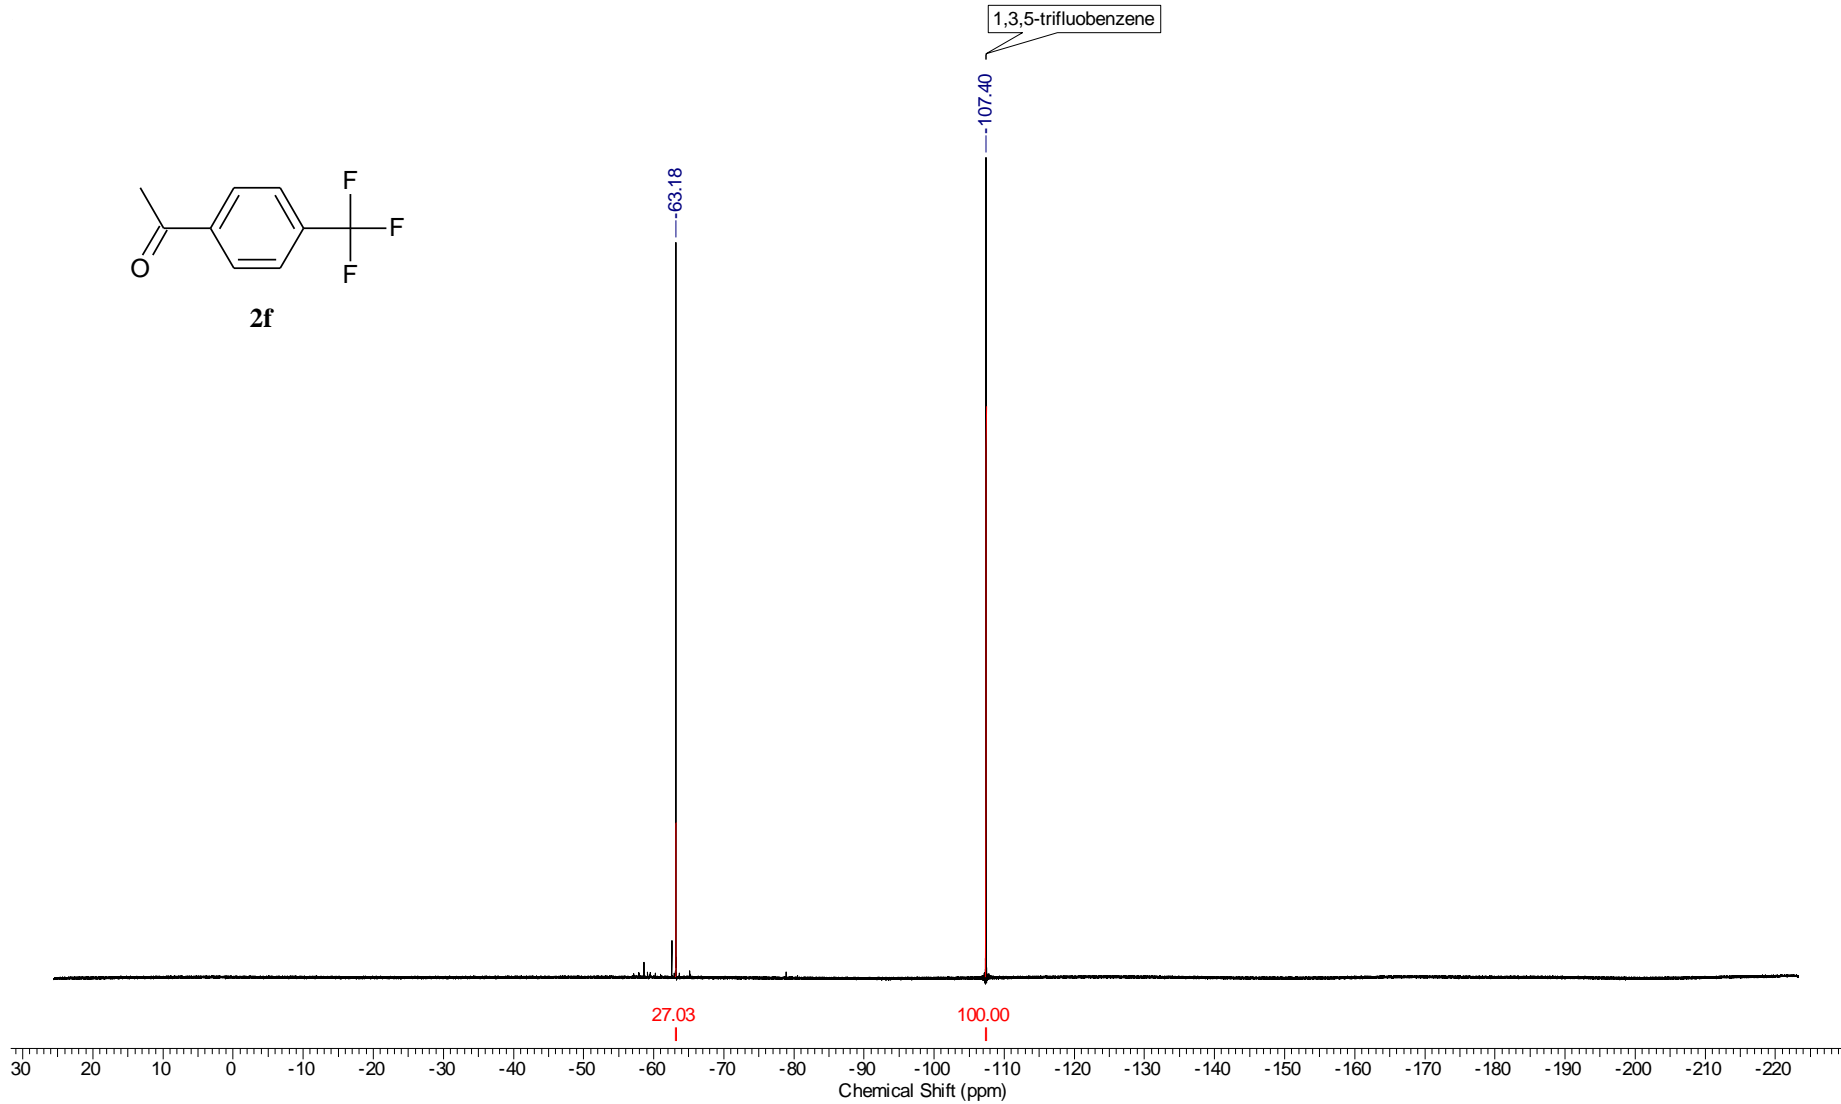

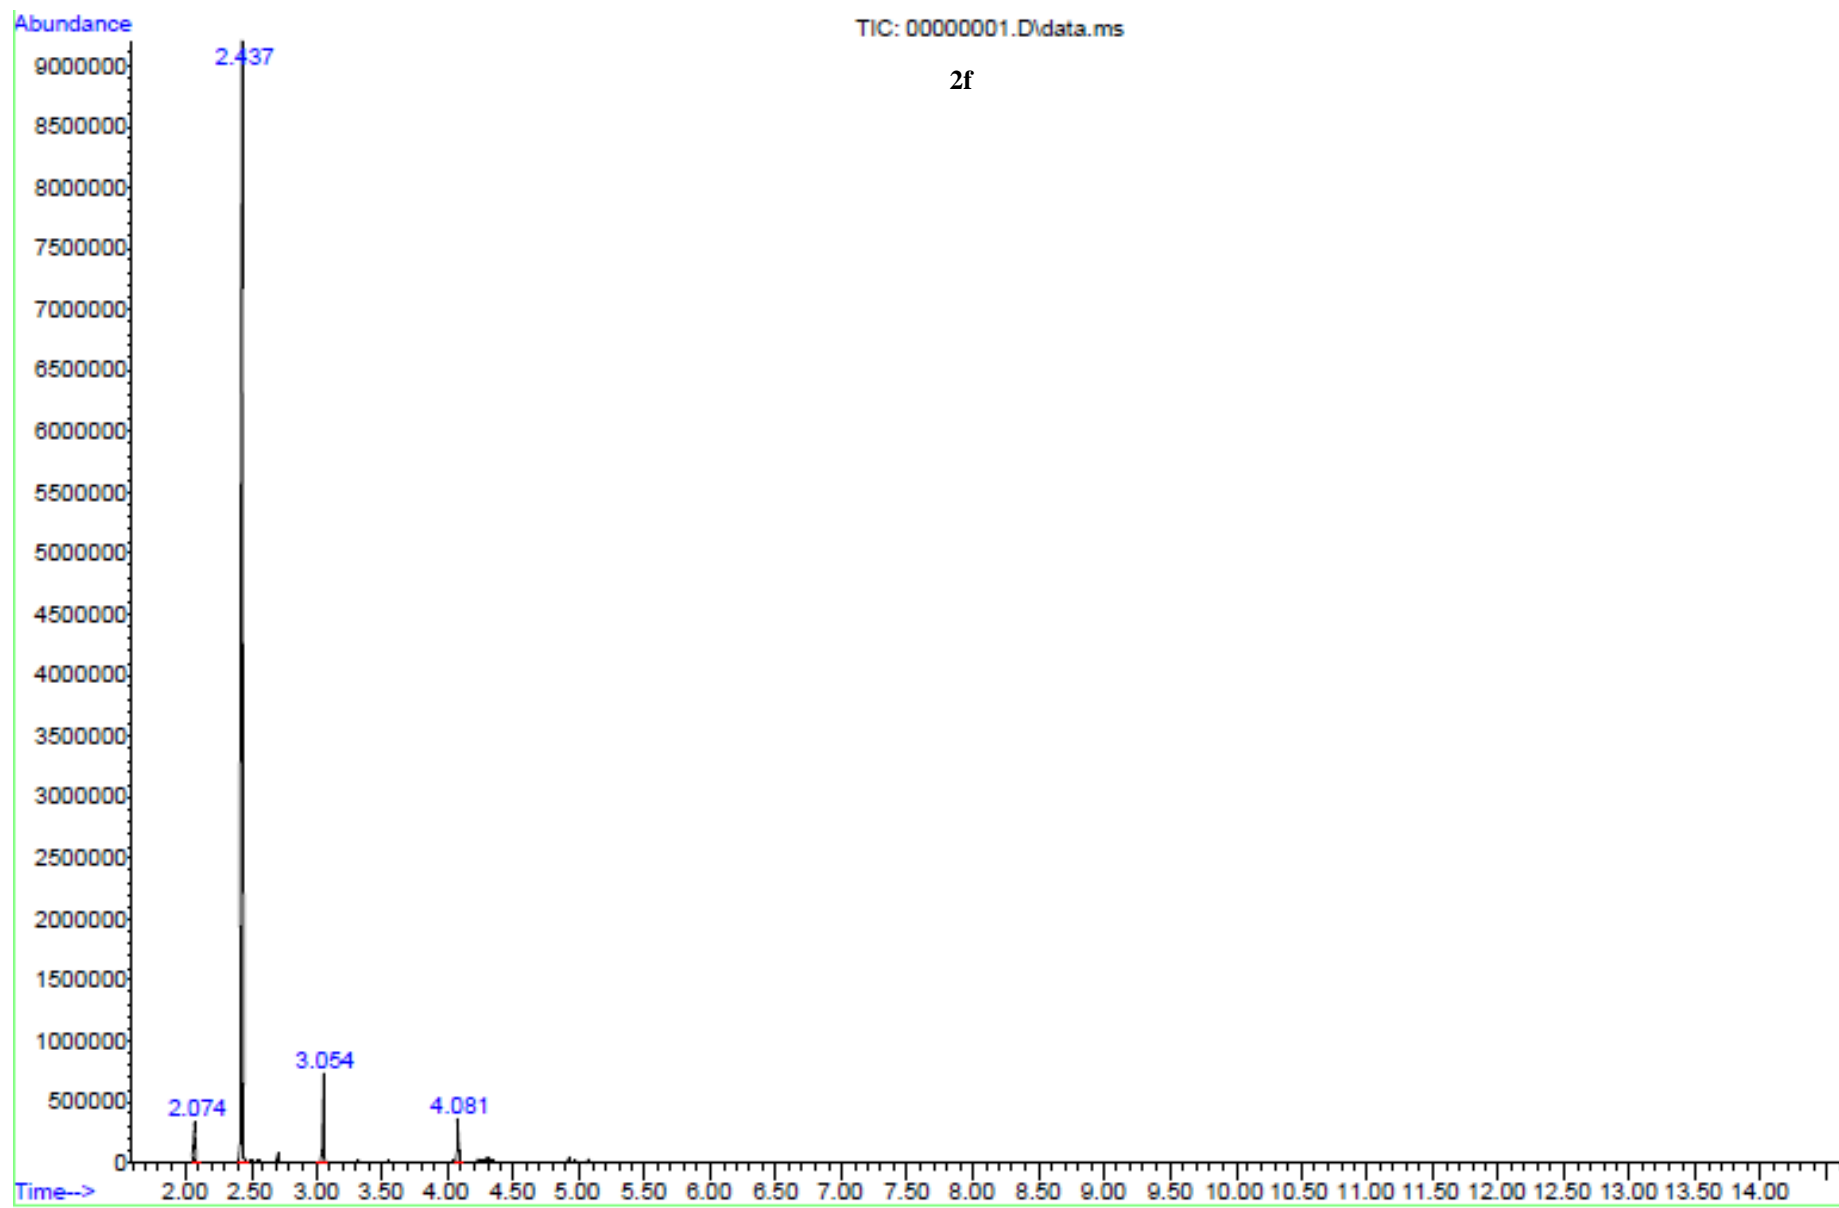

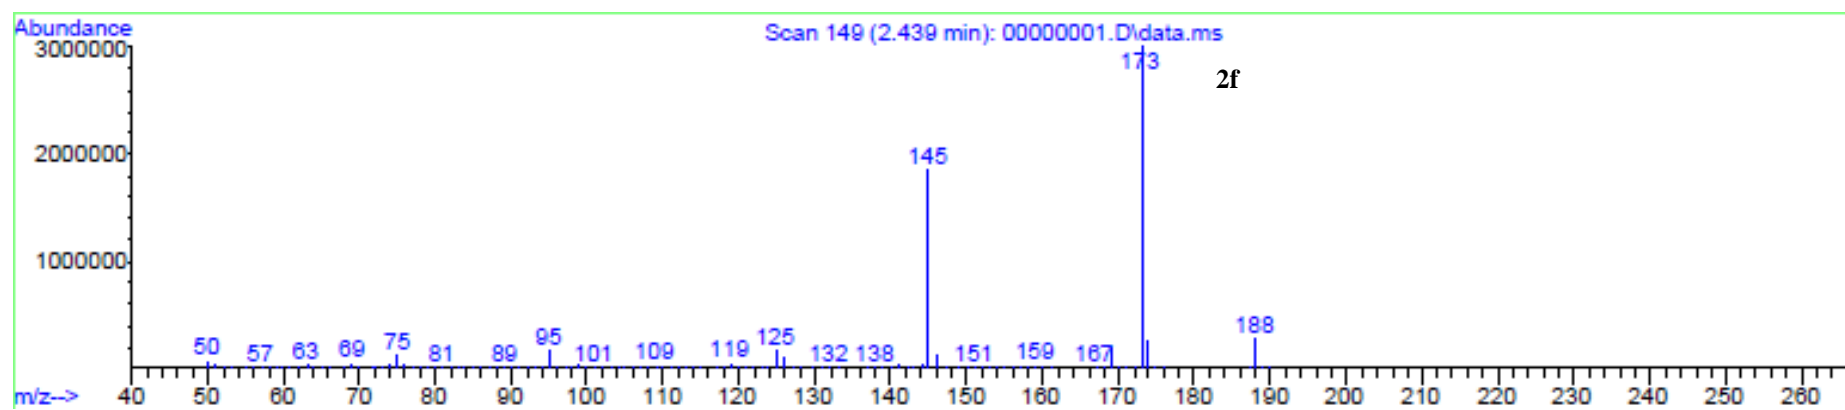

|                       |              |                      |                |                      |          |                        |                     |
|-----------------------|--------------|----------------------|----------------|----------------------|----------|------------------------|---------------------|
| Frequency (MHz)       | 376.71       | Nucleus              | 19F            | Number of Transients | 64       | Origin                 | Bruker BioSpin GmbH |
| Original Points Count | 131072       | Owner                | tibbe_operator | Points Count         | 131072   | SW(cyclical) (Hz)      | 93749.28            |
| Solvent               | CHLOROFORM-d | Spectrum Offset (Hz) | -37318.8555    | Sweep Width (Hz)     | 93748.56 | Temperature (degree C) | 27.000              |

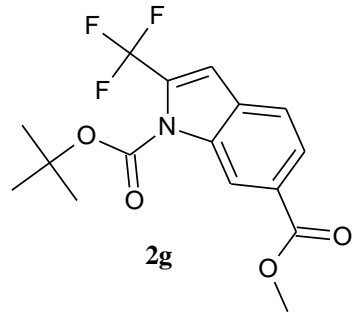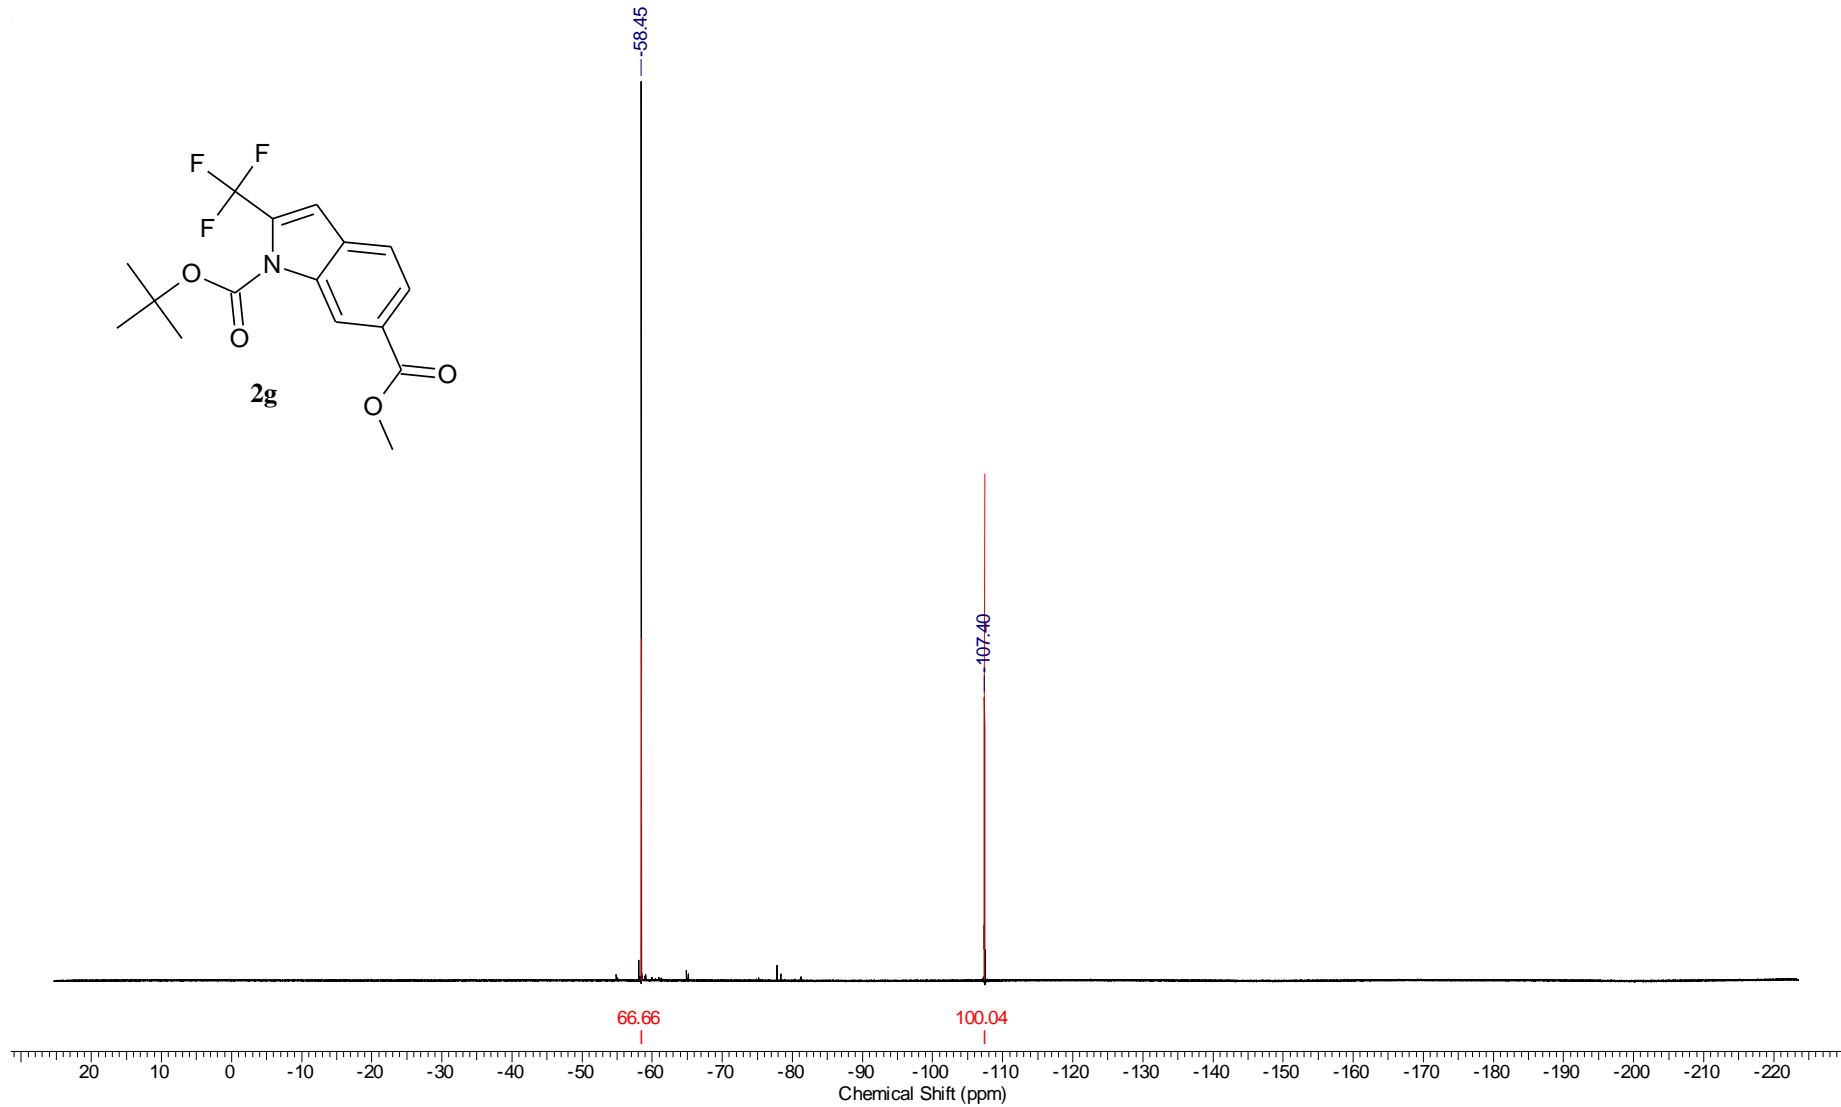

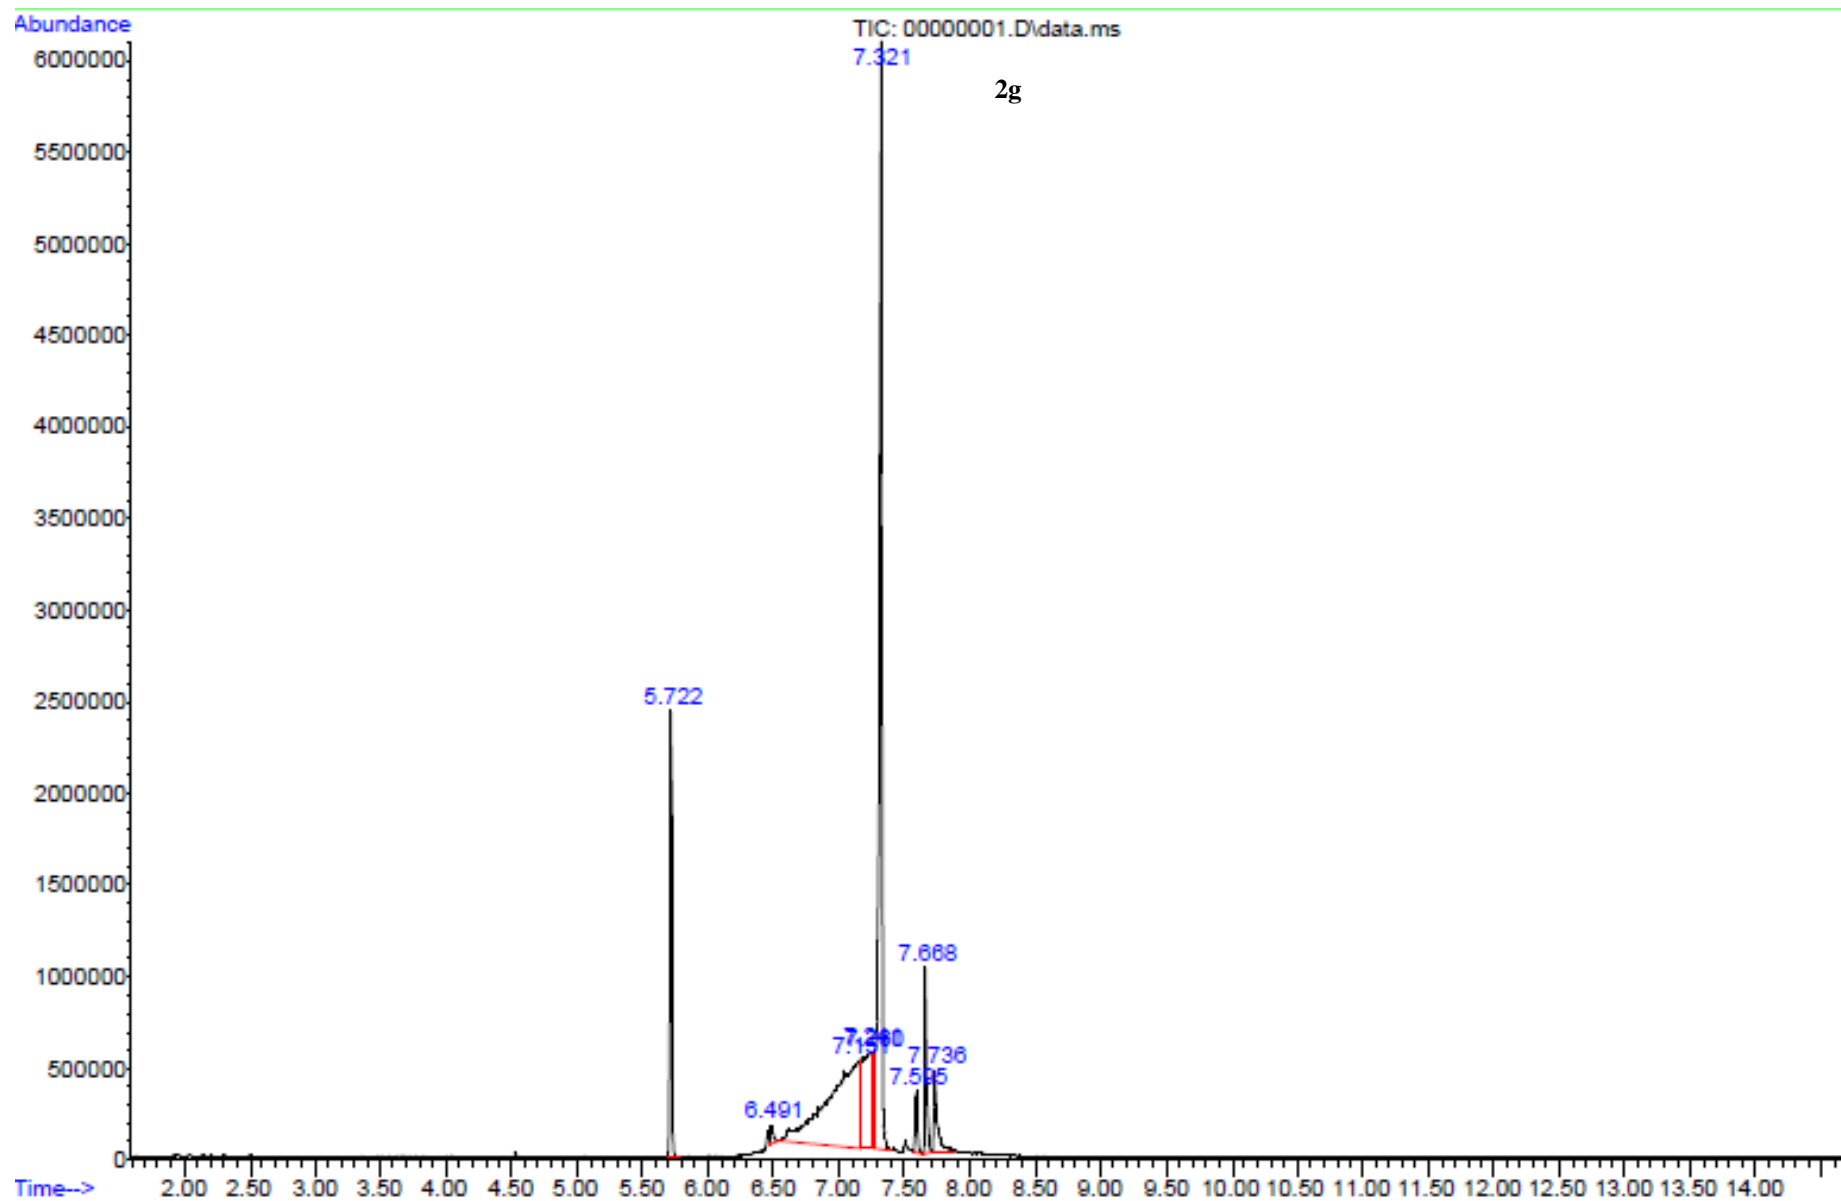

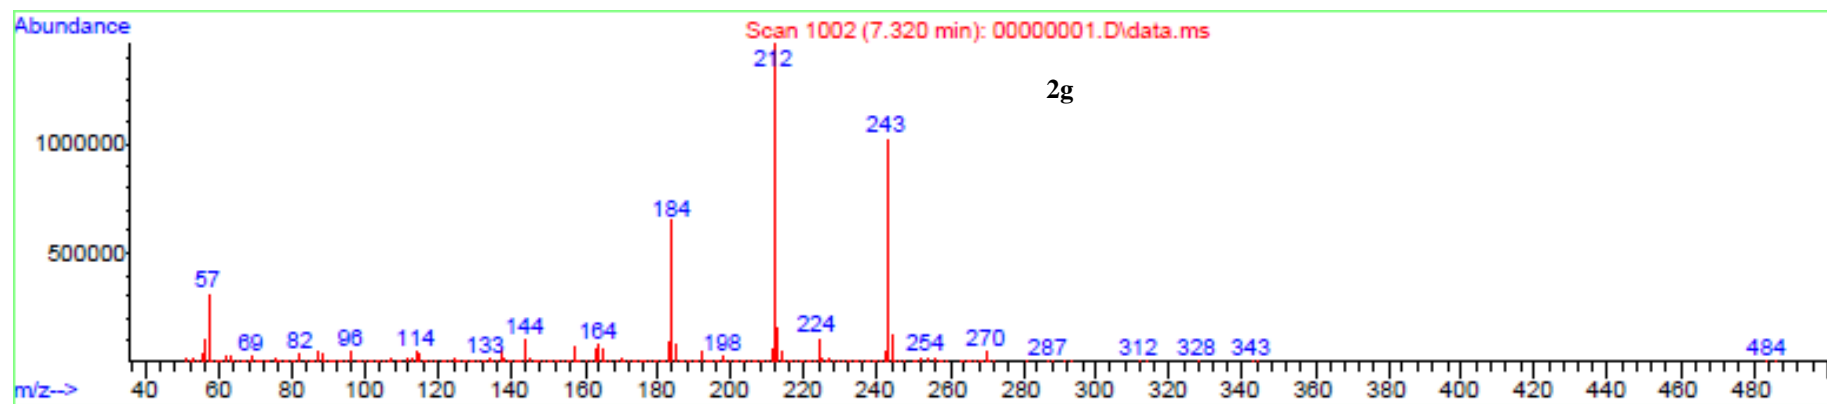

|                       |              |                      |                |                      |         |                        |                     |
|-----------------------|--------------|----------------------|----------------|----------------------|---------|------------------------|---------------------|
| Frequency (MHz)       | 400.40       | Nucleus              | 1H             | Number of Transients | 16      | Origin                 | Bruker BioSpin GmbH |
| Original Points Count | 32768        | Owner                | tibbe_operator | Points Count         | 32768   | SW(cyclical) (Hz)      | 7211.32             |
| Solvent               | CHLOROFORM-d | Spectrum Offset (Hz) | 3395.8613      | Sweep Width (Hz)     | 7211.10 | Temperature (degree C) | 27.100              |

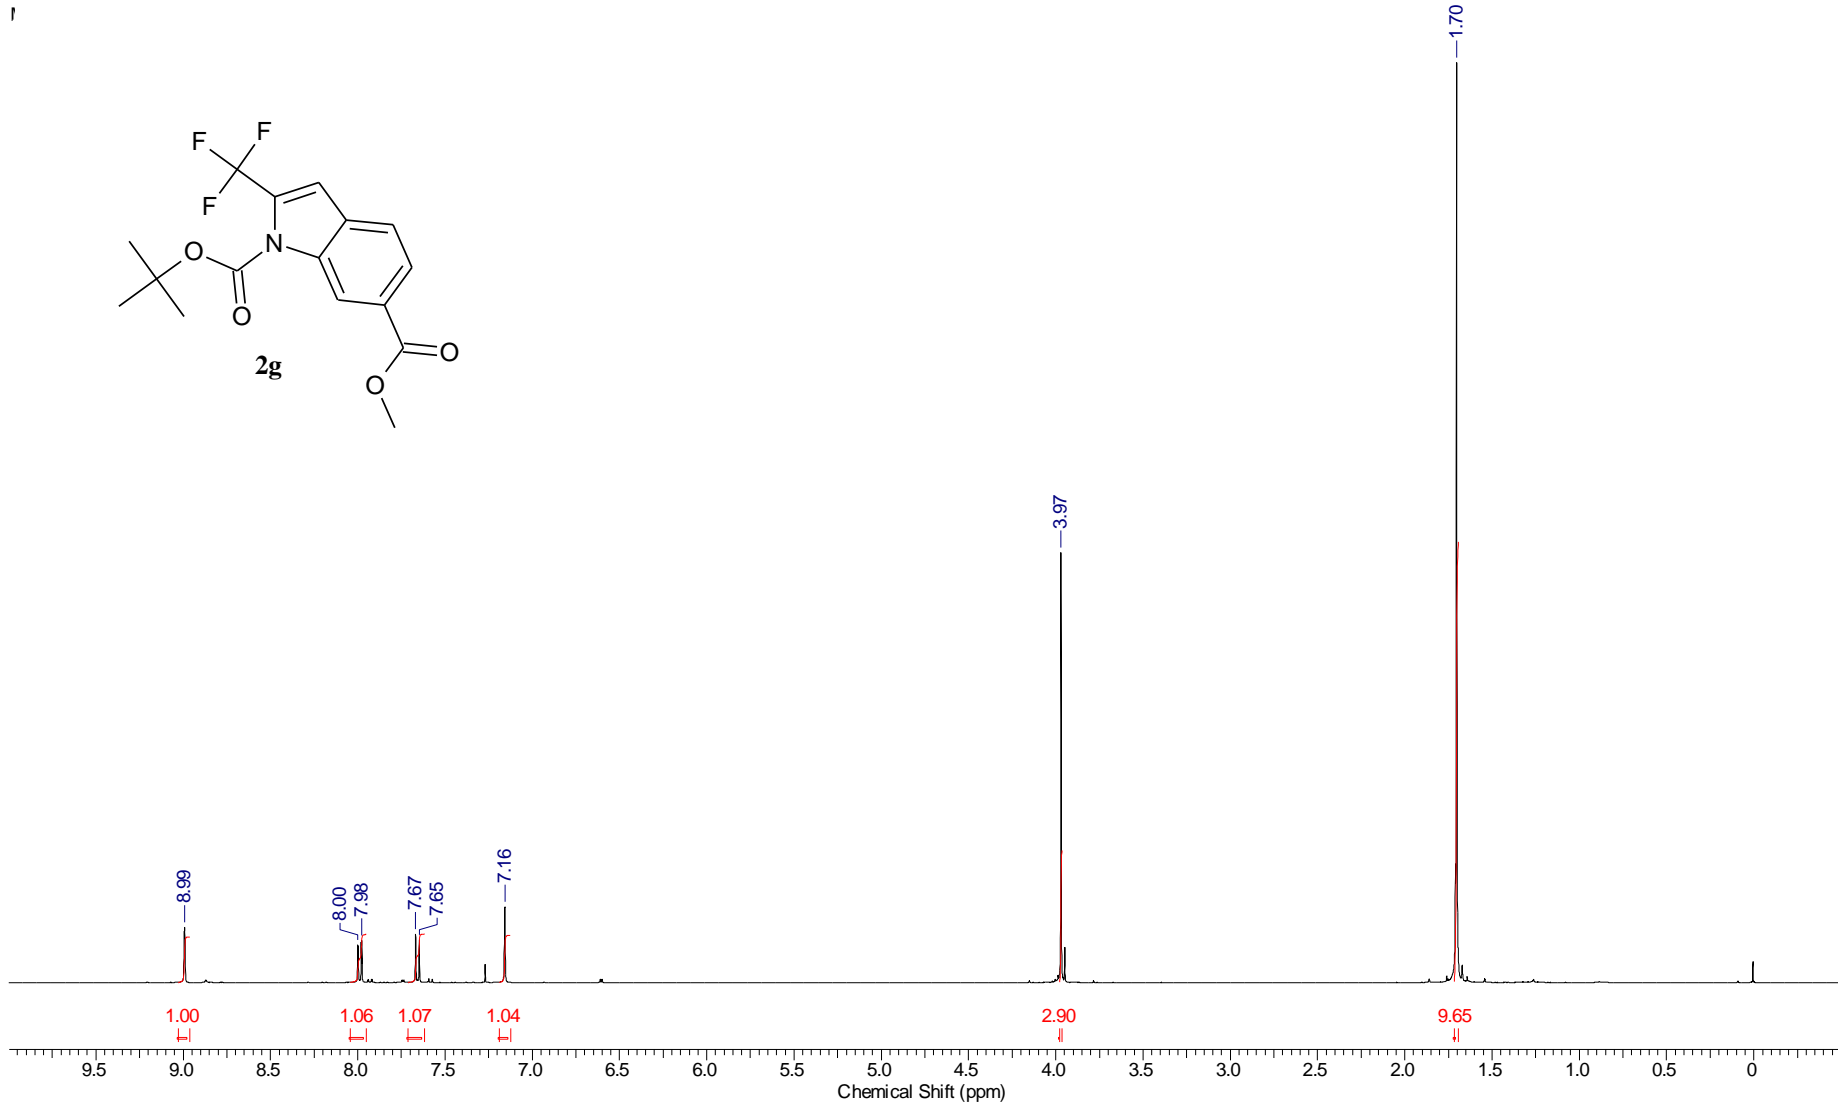

|                       |              |                      |                 |                      |          |                        |                     |
|-----------------------|--------------|----------------------|-----------------|----------------------|----------|------------------------|---------------------|
| Frequency (MHz)       | 100.69       | Nucleus              | <sup>13</sup> C | Number of Transients | 1024     | Origin                 | Bruker BioSpin GmbH |
| Original Points Count | 32768        | Owner                | tibbe_operator  | Points Count         | 32768    | SW(cyclical) (Hz)      | 24037.73            |
| Solvent               | CHLOROFORM-d | Spectrum Offset (Hz) | 10065.7764      | Sweep Width (Hz)     | 24036.99 | Temperature (degree C) | 27.000              |

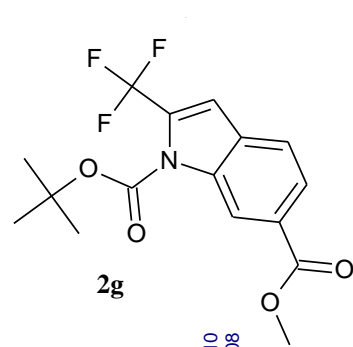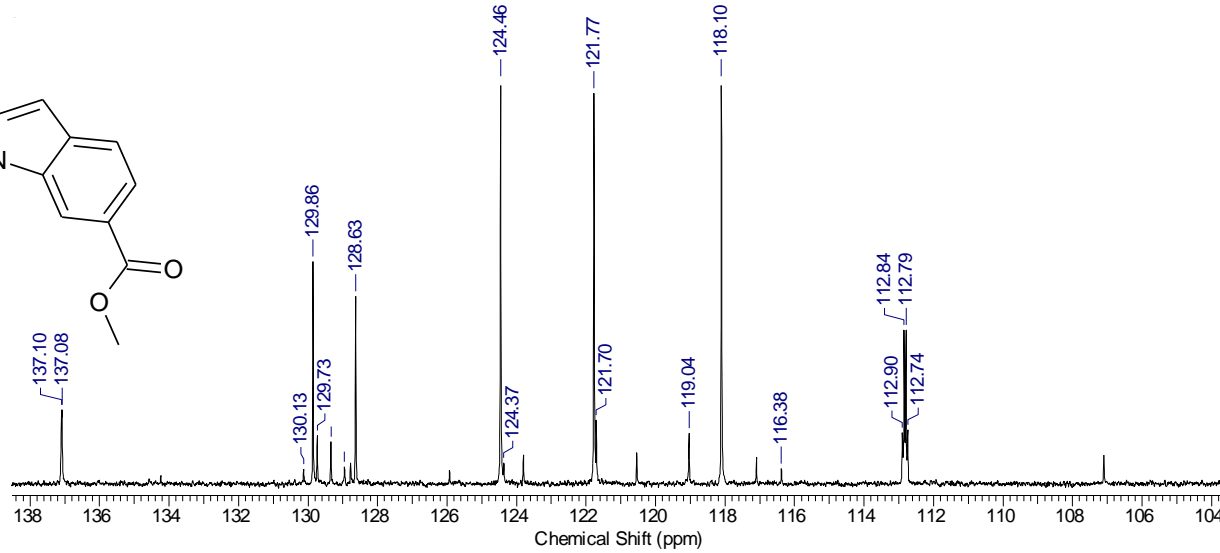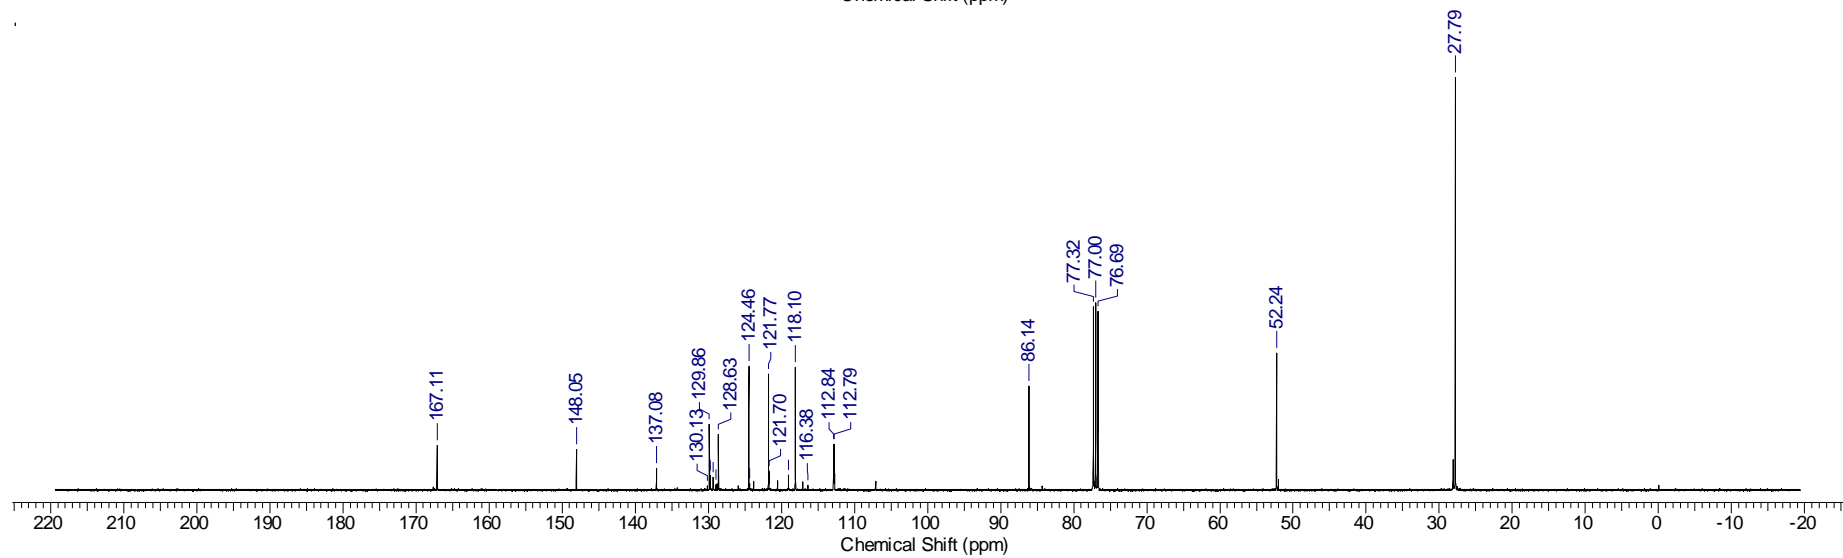



|                              |              |                             |                          |                             |          |                               |                     |
|------------------------------|--------------|-----------------------------|--------------------------|-----------------------------|----------|-------------------------------|---------------------|
| <b>Frequency (MHz)</b>       | 100.69       | <b>Nucleus</b>              | <sup>13</sup> C Dent 135 | <b>Number of Transients</b> | 256      | <b>Origin</b>                 | Bruker BioSpin GmbH |
| <b>Original Points Count</b> | 32768        | <b>Owner</b>                | tibbe_operator           | <b>Points Count</b>         | 32768    | <b>SW(cyclical) (Hz)</b>      | 24037.73            |
| <b>Solvent</b>               | CHLOROFORM-d | <b>Spectrum Offset (Hz)</b> | 10065.3389               | <b>Sweep Width (Hz)</b>     | 24036.99 | <b>Temperature (degree C)</b> | 27.000              |

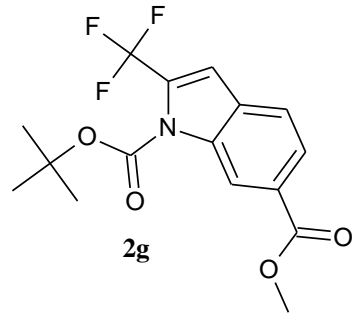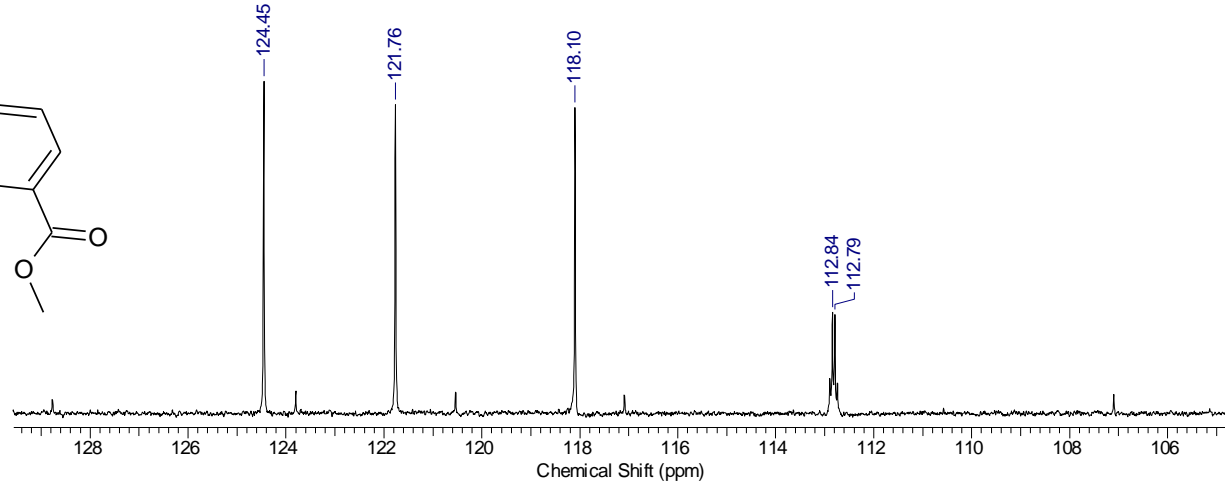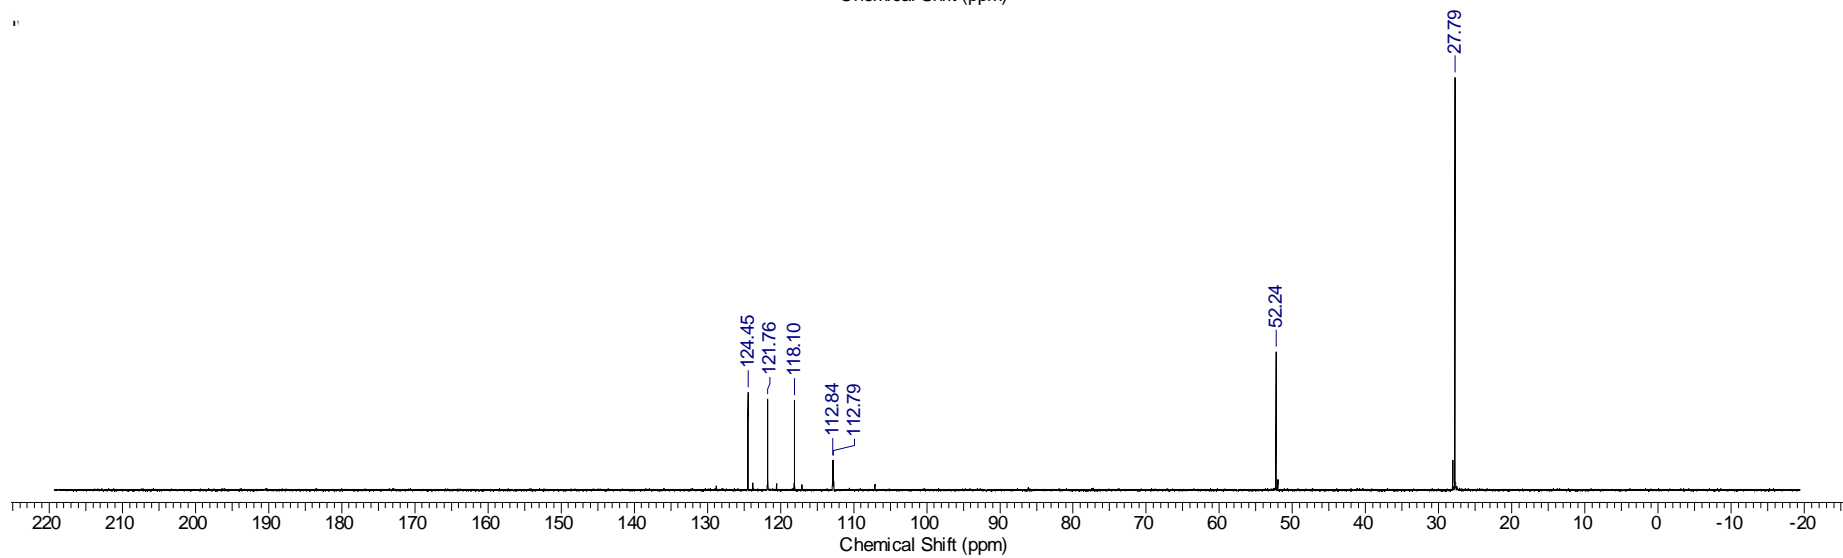

|                              |              |                             |                |                             |          |                               |                     |
|------------------------------|--------------|-----------------------------|----------------|-----------------------------|----------|-------------------------------|---------------------|
| <b>Frequency (MHz)</b>       | 376.71       | <b>Nucleus</b>              | 19F            | <b>Number of Transients</b> | 64       | <b>Origin</b>                 | Bruker BioSpin GmbH |
| <b>Original Points Count</b> | 131072       | <b>Owner</b>                | tibbe_operator | <b>Points Count</b>         | 131072   | <b>SW(cyclical) (Hz)</b>      | 93749.28            |
| <b>Solvent</b>               | CHLOROFORM-d | <b>Spectrum Offset (Hz)</b> | -37637.5352    | <b>Sweep Width (Hz)</b>     | 93748.56 | <b>Temperature (degree C)</b> | 27.000              |

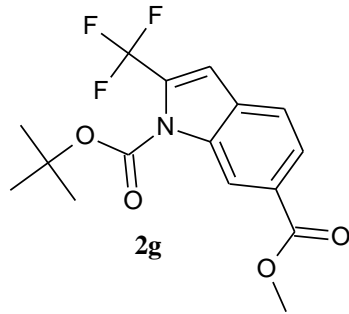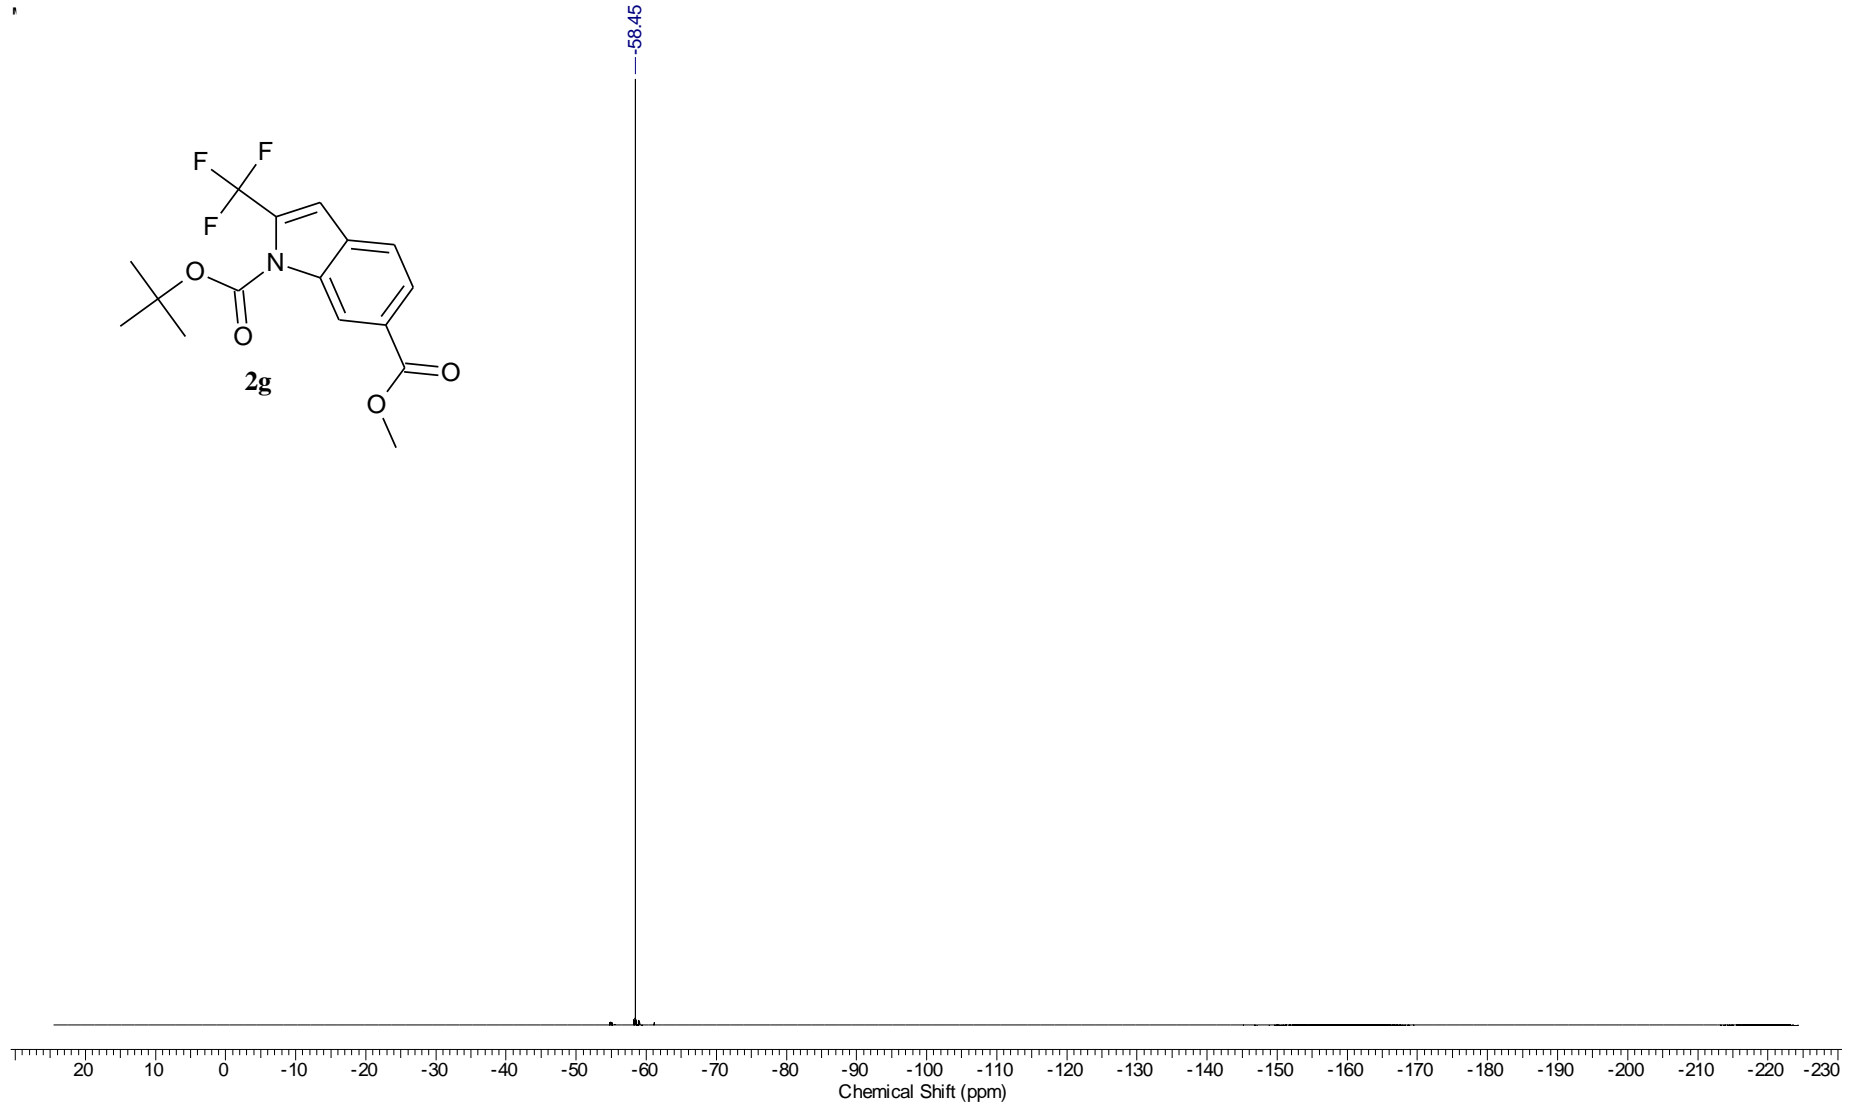

|                       |              |                      |                |                      |          |                        |                     |
|-----------------------|--------------|----------------------|----------------|----------------------|----------|------------------------|---------------------|
| Frequency (MHz)       | 376.71       | Nucleus              | 19F            | Number of Transients | 64       | Origin                 | Bruker BioSpin GmbH |
| Original Points Count | 131072       | Owner                | tibbe_operator | Points Count         | 131072   | SW(cyclical) (Hz)      | 93749.28            |
| Solvent               | CHLOROFORM-d | Spectrum Offset (Hz) | -37433.2930    | Sweep Width (Hz)     | 93748.56 | Temperature (degree C) | 27.000              |

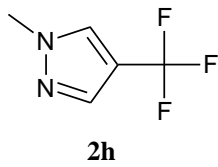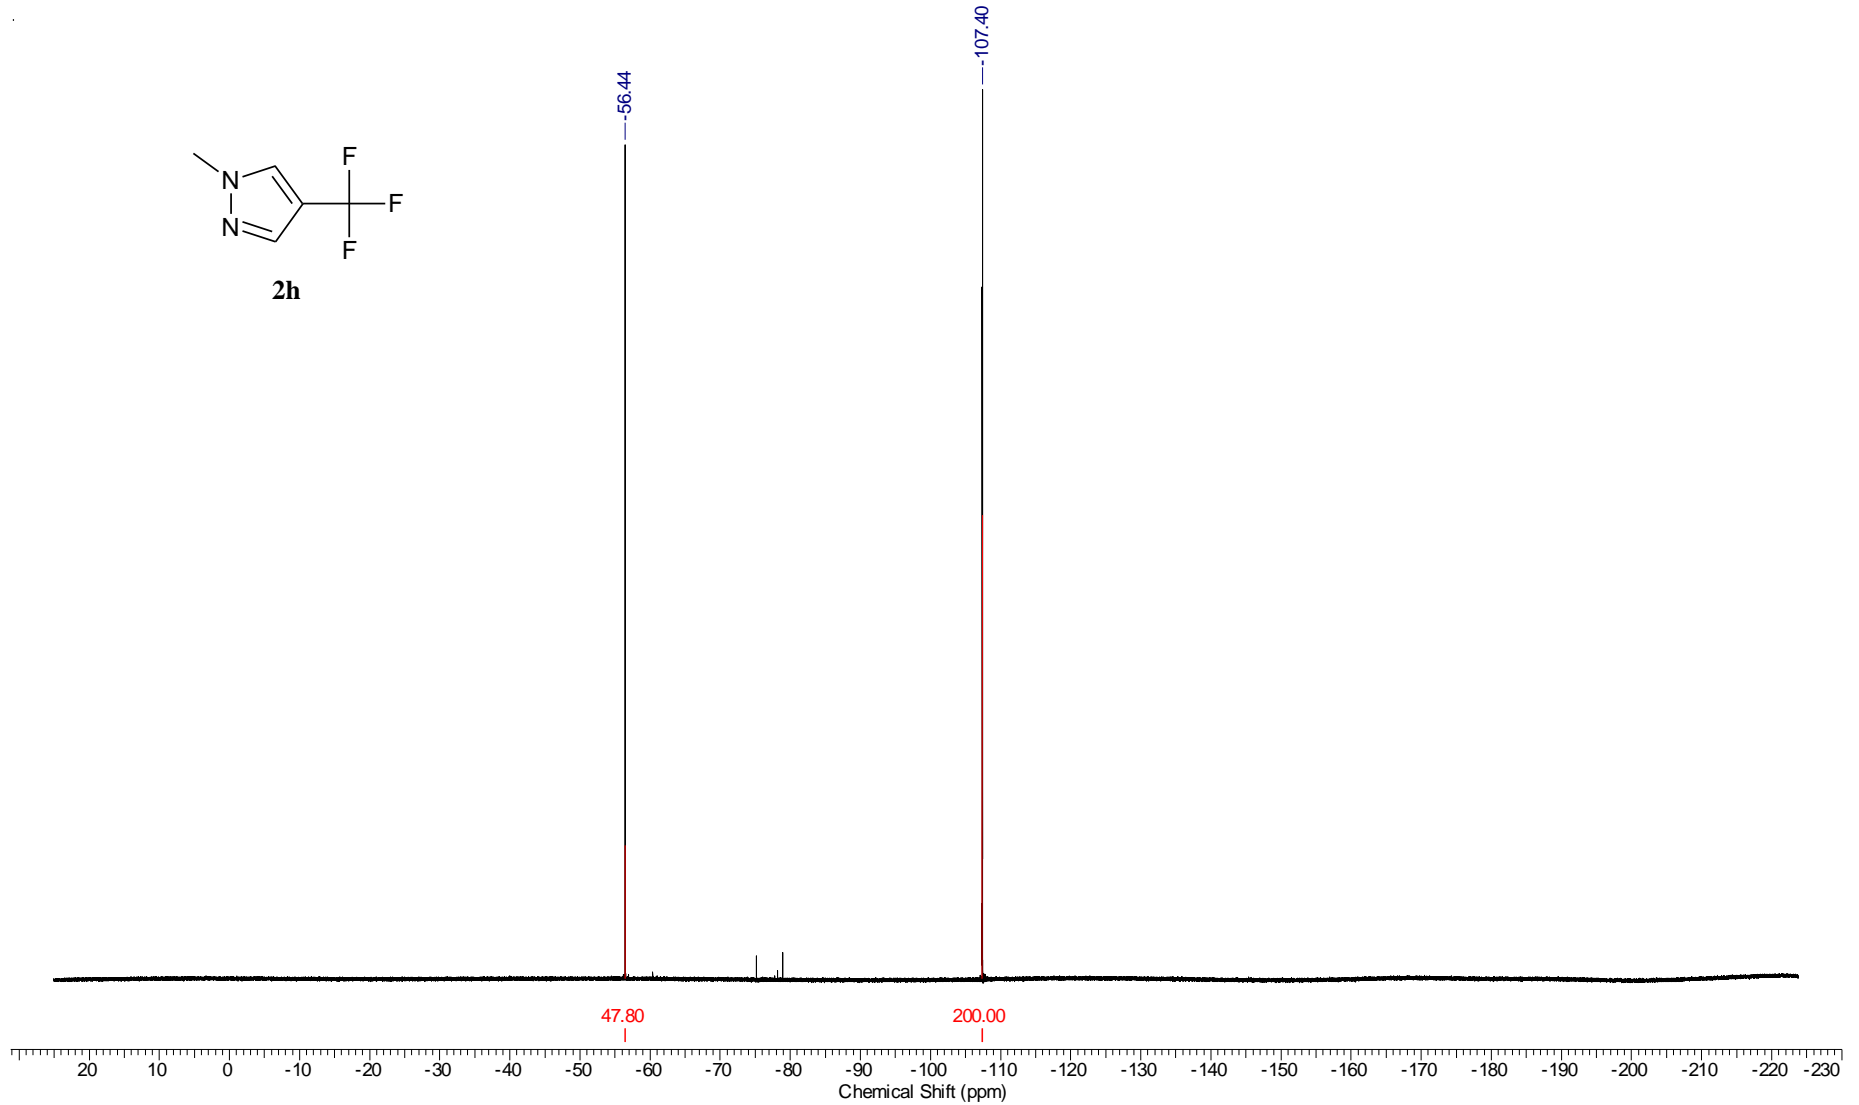

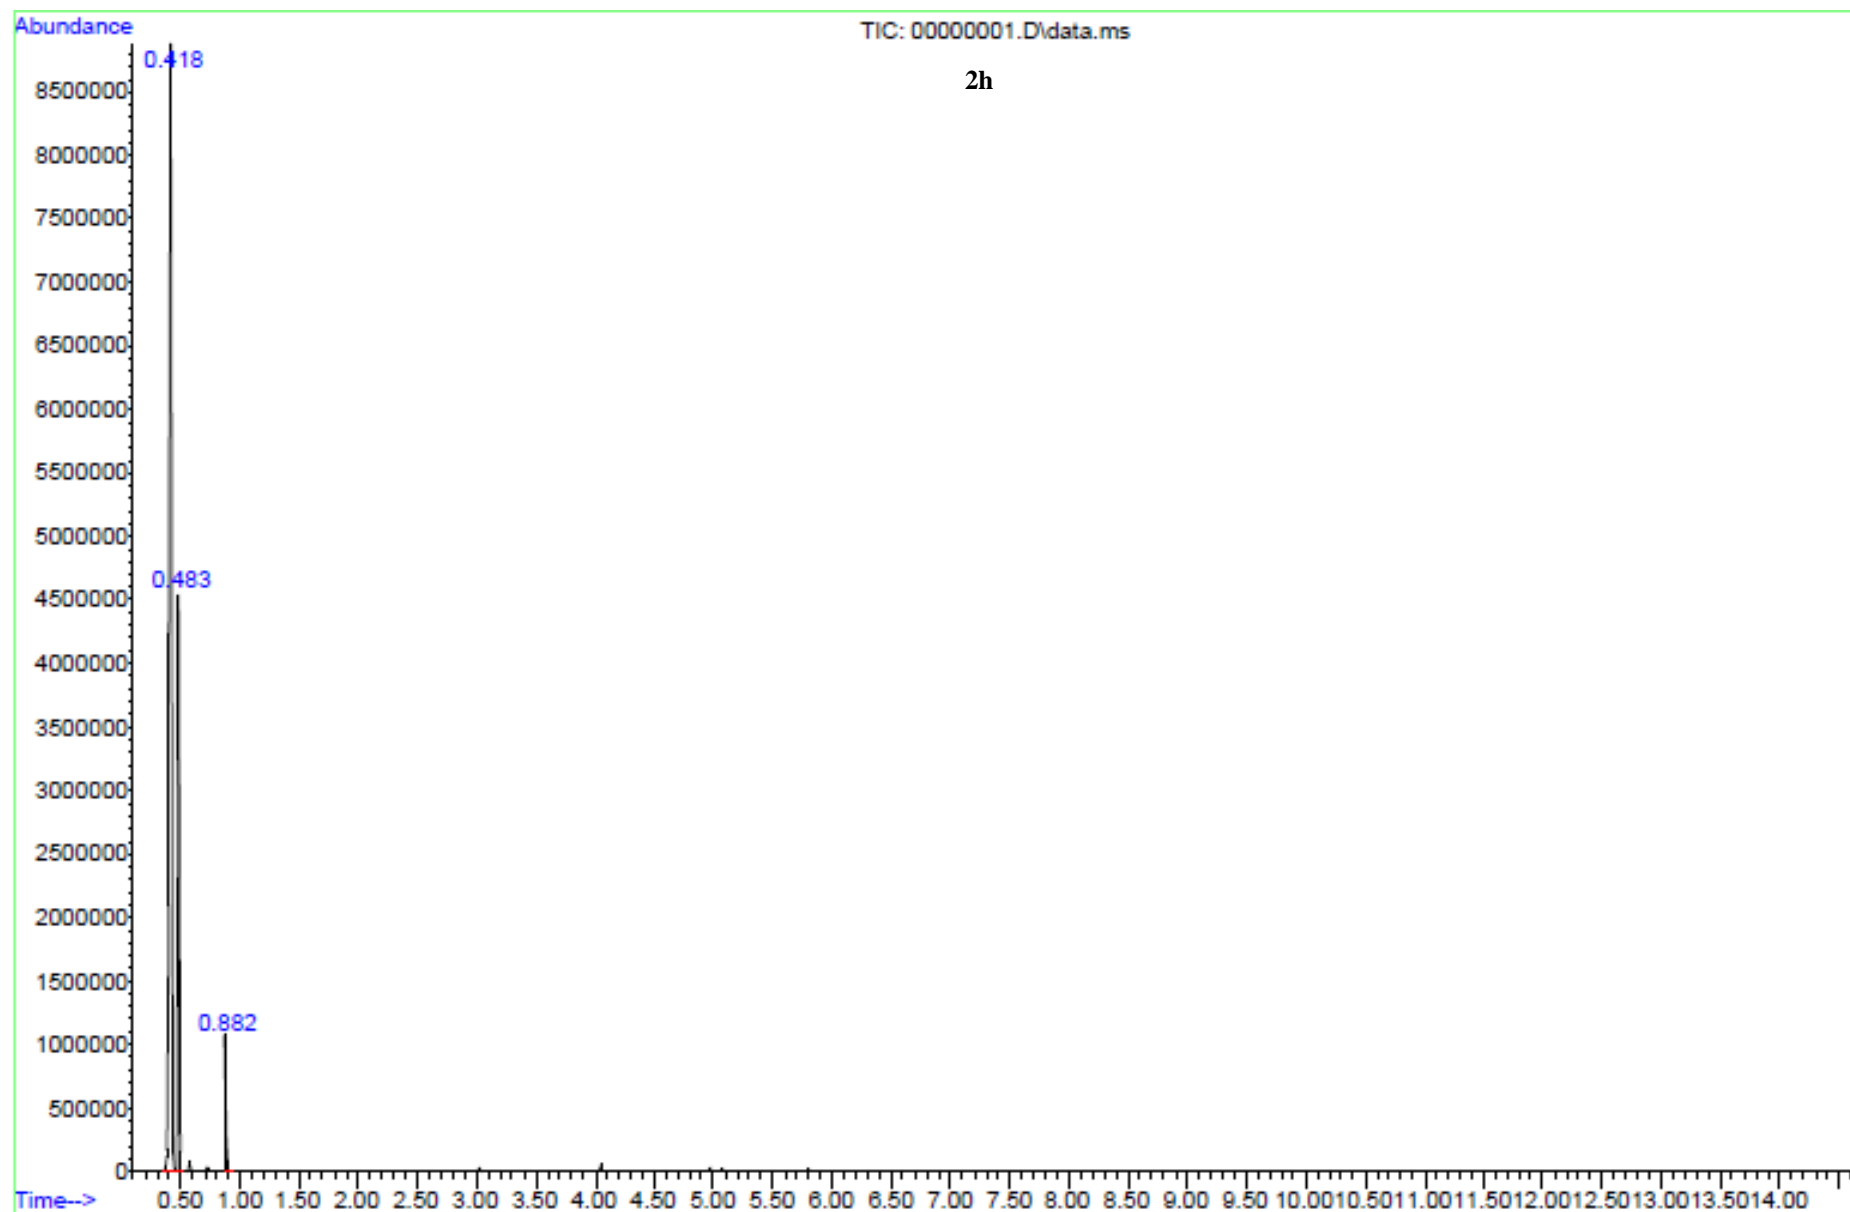

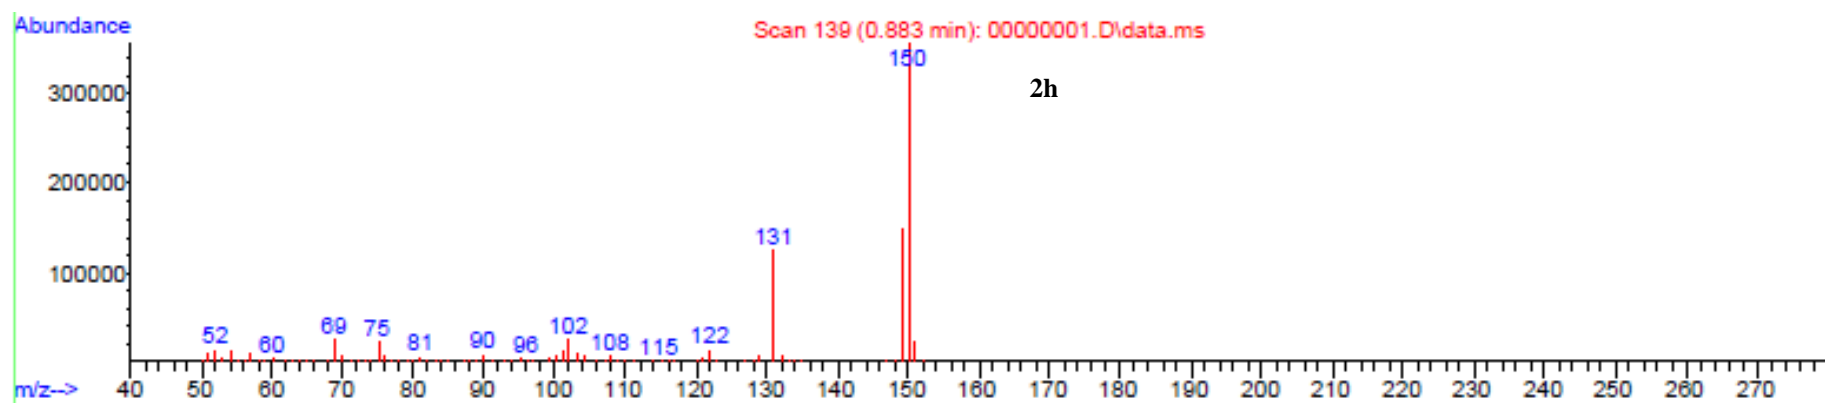

|                       |              |                      |                 |                      |          |                        |                     |
|-----------------------|--------------|----------------------|-----------------|----------------------|----------|------------------------|---------------------|
| Frequency (MHz)       | 376.71       | Nucleus              | <sup>19</sup> F | Number of Transients | 64       | Origin                 | Bruker BioSpin GmbH |
| Original Points Count | 131072       | Owner                | tibbe_operator  | Points Count         | 131072   | SW(cyclical) (Hz)      | 93749.28            |
| Solvent               | CHLOROFORM-d | Spectrum Offset (Hz) | -37470.4922     | Sweep Width (Hz)     | 93748.56 | Temperature (degree C) | 27.000              |

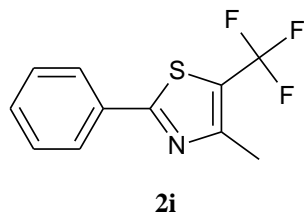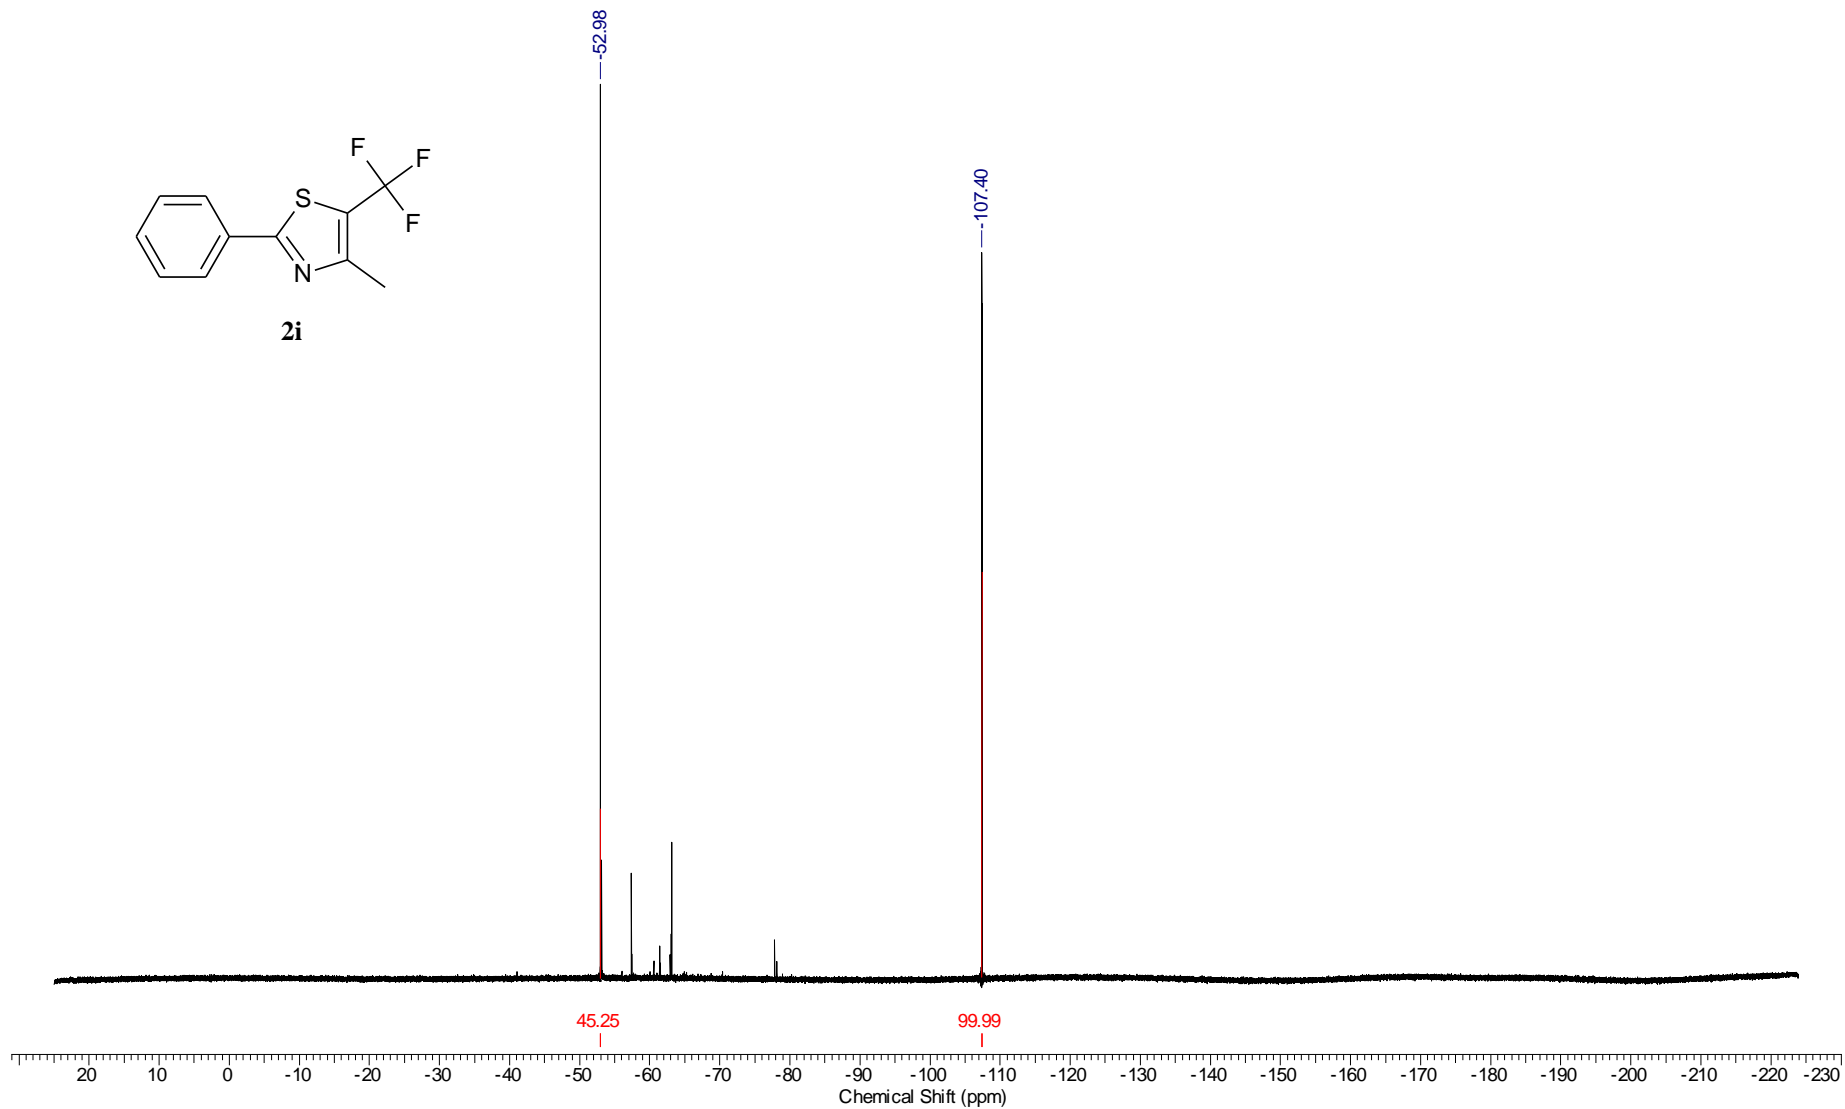

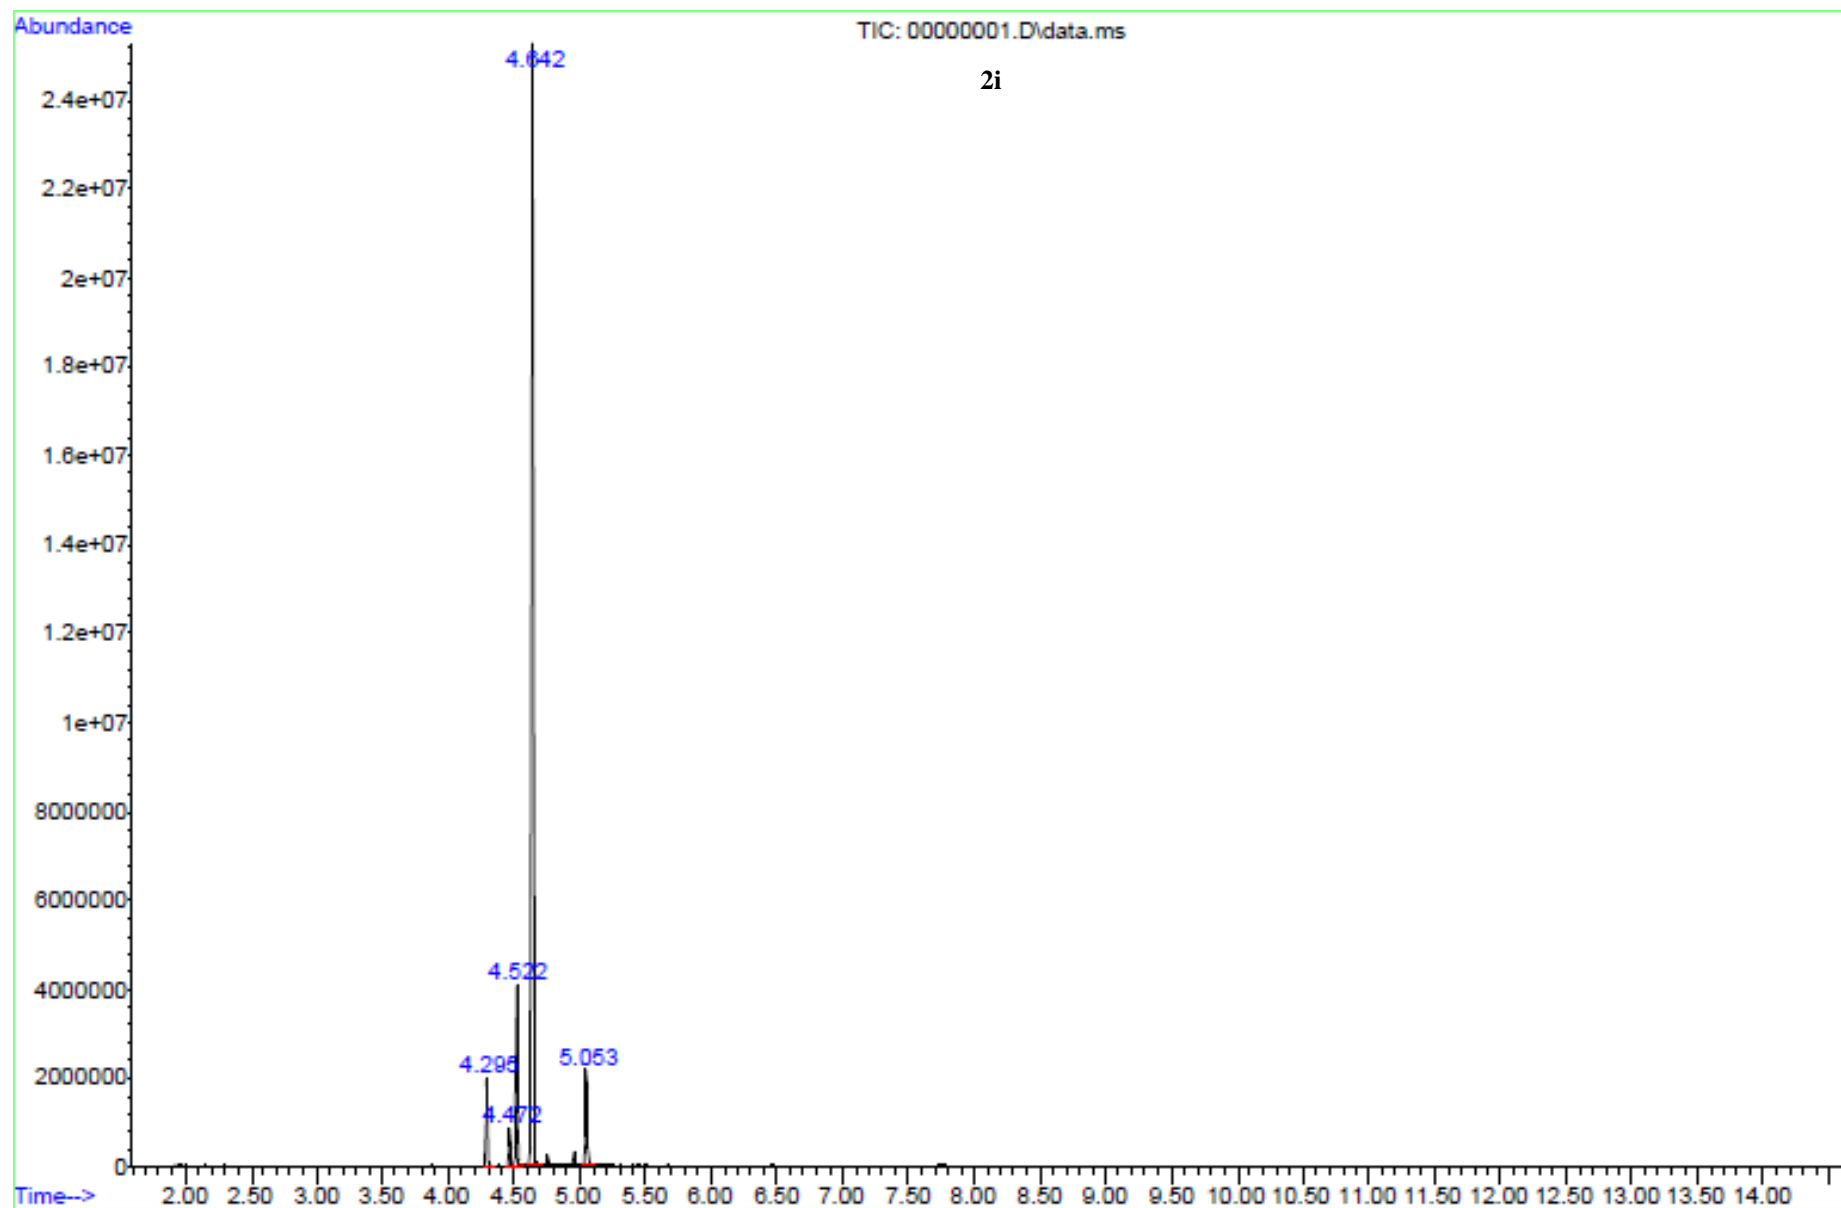

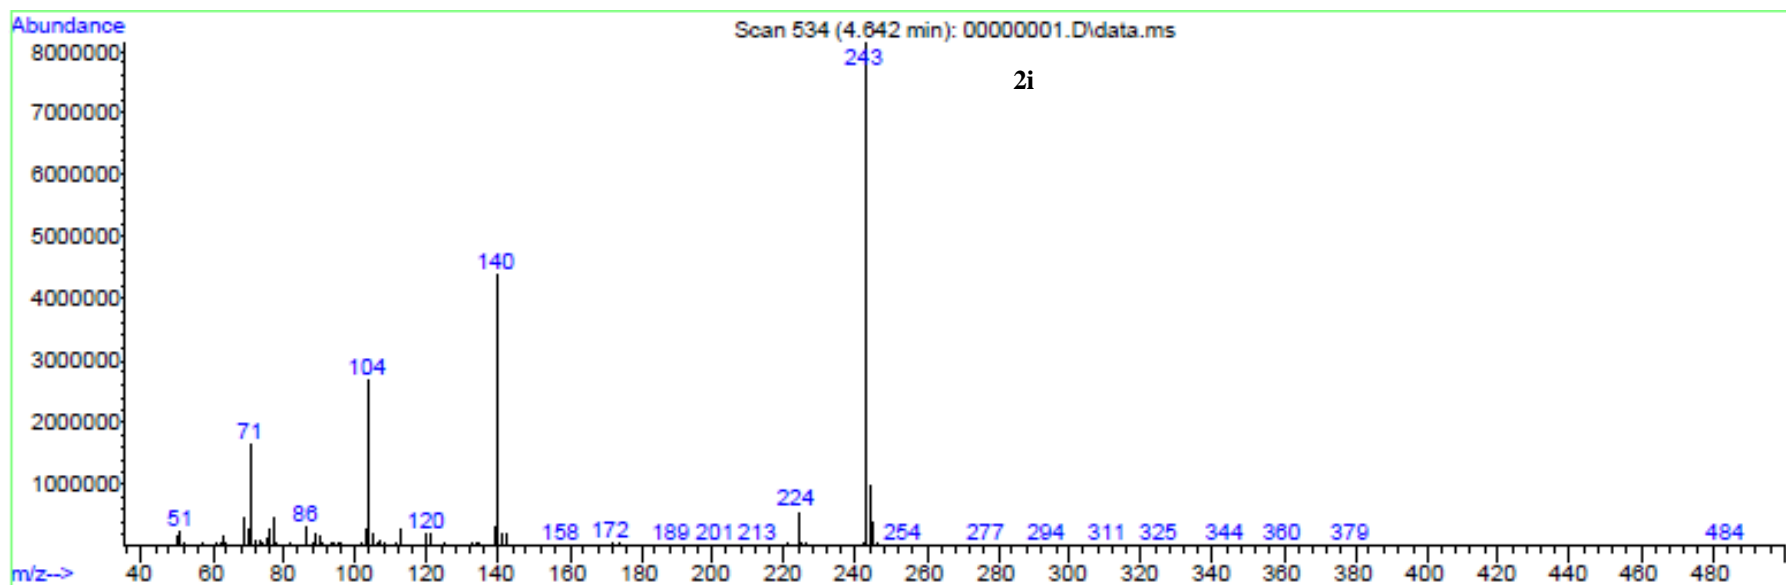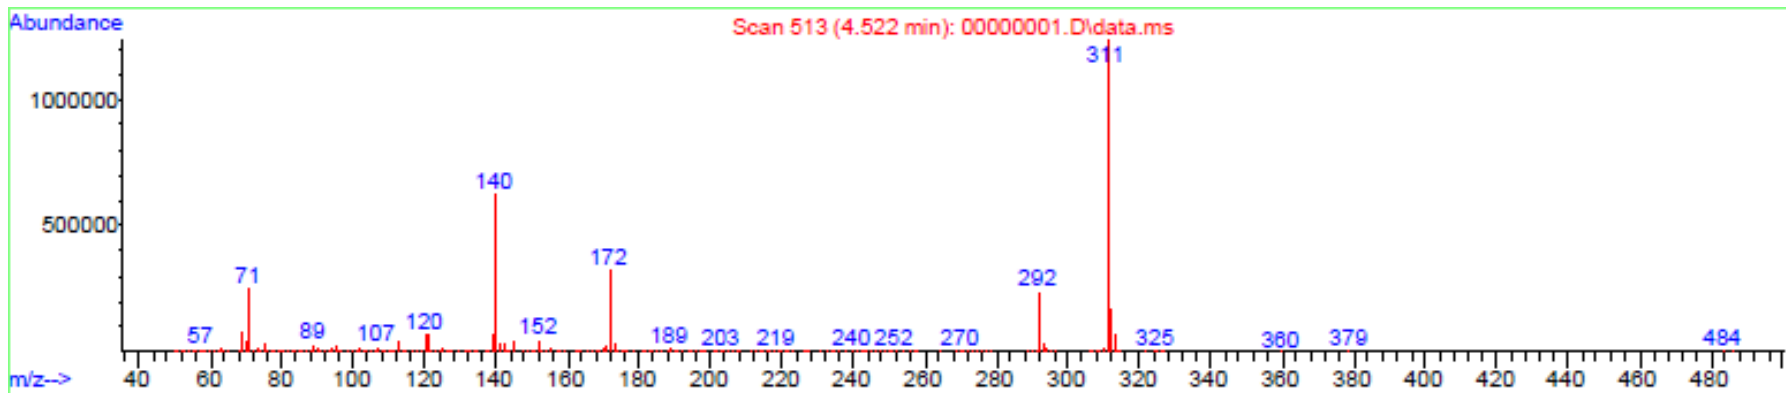



|                       |              |                      |                |                      |         |                        |                     |
|-----------------------|--------------|----------------------|----------------|----------------------|---------|------------------------|---------------------|
| Frequency (MHz)       | 400.40       | Nucleus              | 1H             | Number of Transients | 16      | Origin                 | Bruker BioSpin GmbH |
| Original Points Count | 32768        | Owner                | tibbe_operator | Points Count         | 32768   | SW(cyclical) (Hz)      | 7211.32             |
| Solvent               | CHLOROFORM-d | Spectrum Offset (Hz) | 3395.8611      | Sweep Width (Hz)     | 7211.10 | Temperature (degree C) | 27.000              |

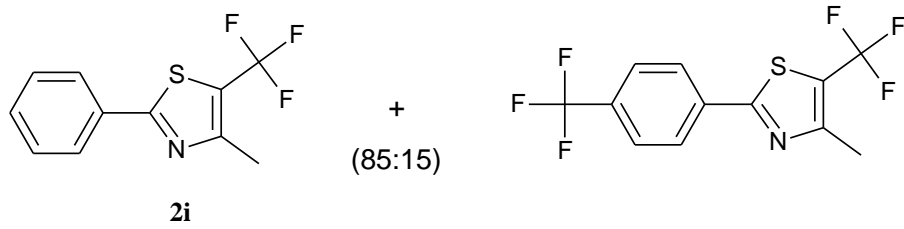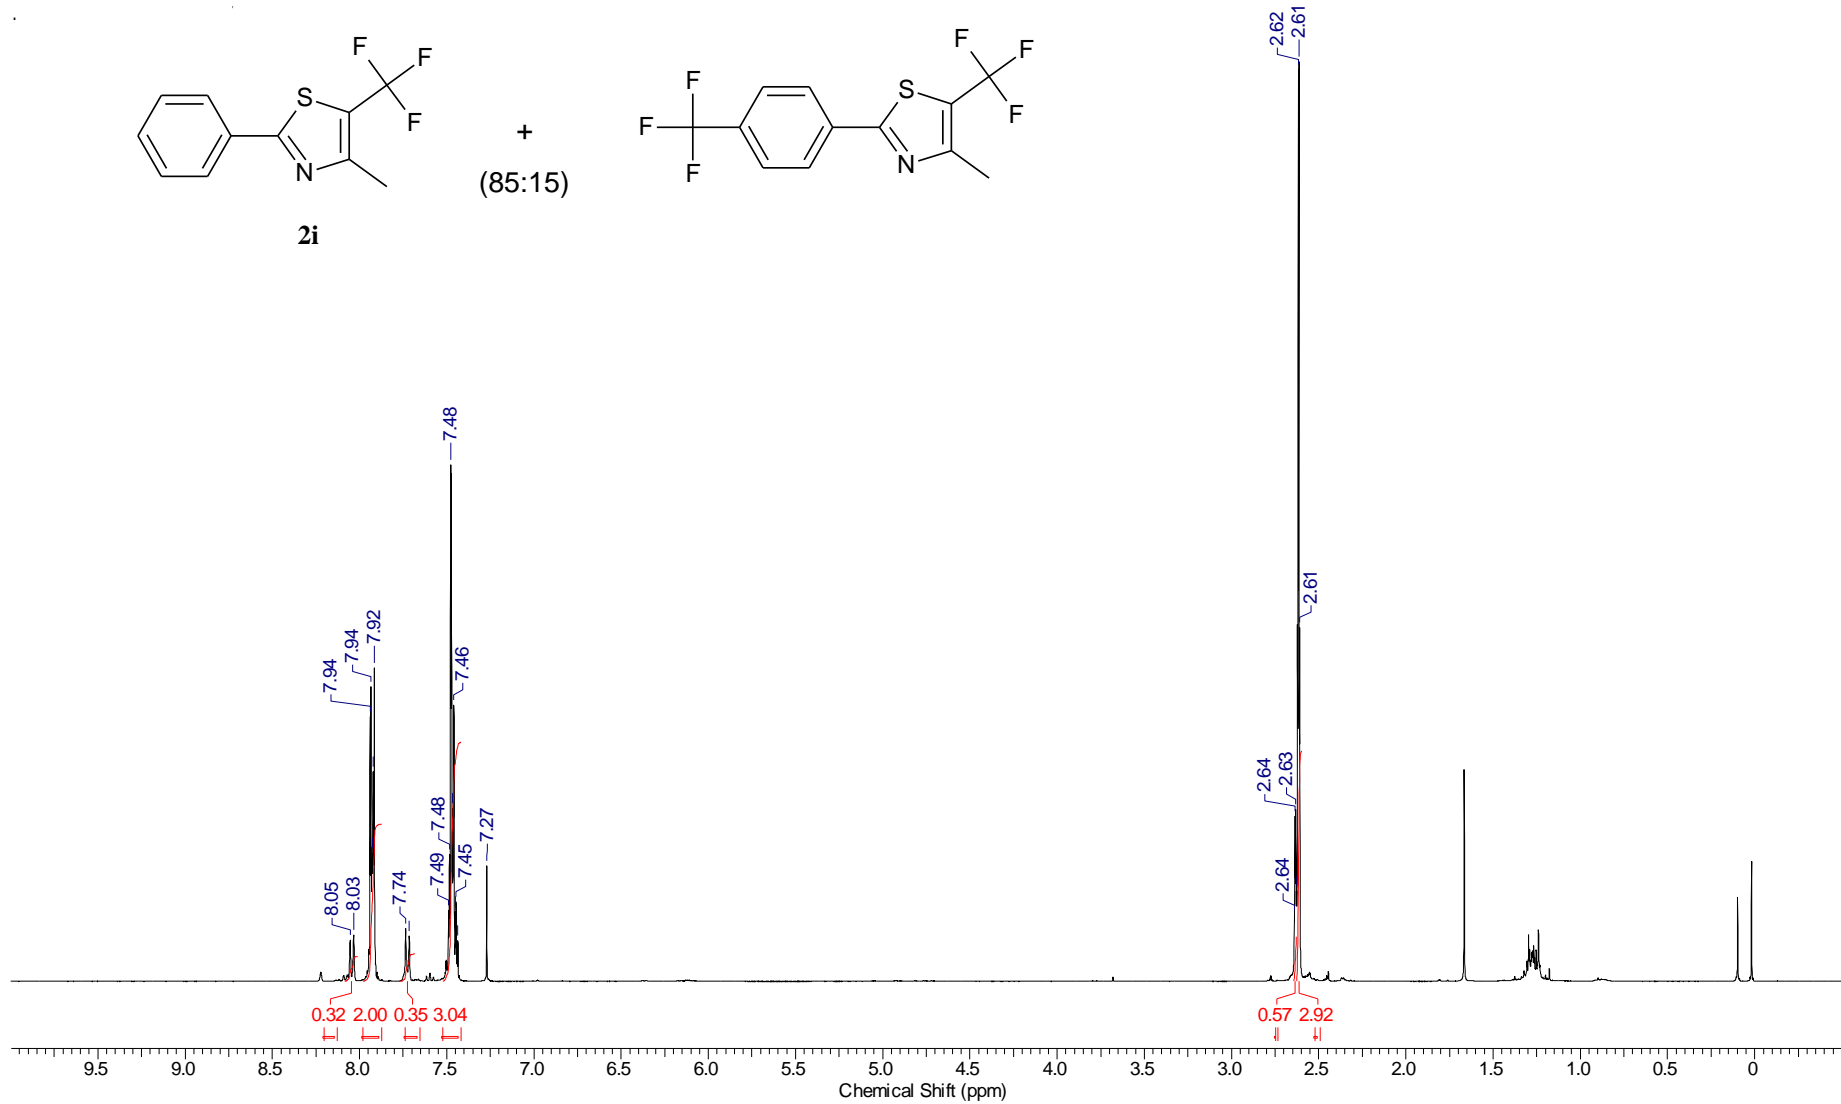

|                       |              |                      |                |                      |          |                        |                     |
|-----------------------|--------------|----------------------|----------------|----------------------|----------|------------------------|---------------------|
| Frequency (MHz)       | 100.69       | Nucleus              | 13C            | Number of Transients | 1024     | Origin                 | Bruker BioSpin GmbH |
| Original Points Count | 32768        | Owner                | tibbe_operator | Points Count         | 32768    | SW(cyclical) (Hz)      | 24037.73            |
| Solvent               | CHLOROFORM-d | Spectrum Offset (Hz) | 10066.5088     | Sweep Width (Hz)     | 24036.99 | Temperature (degree C) | 27.000              |

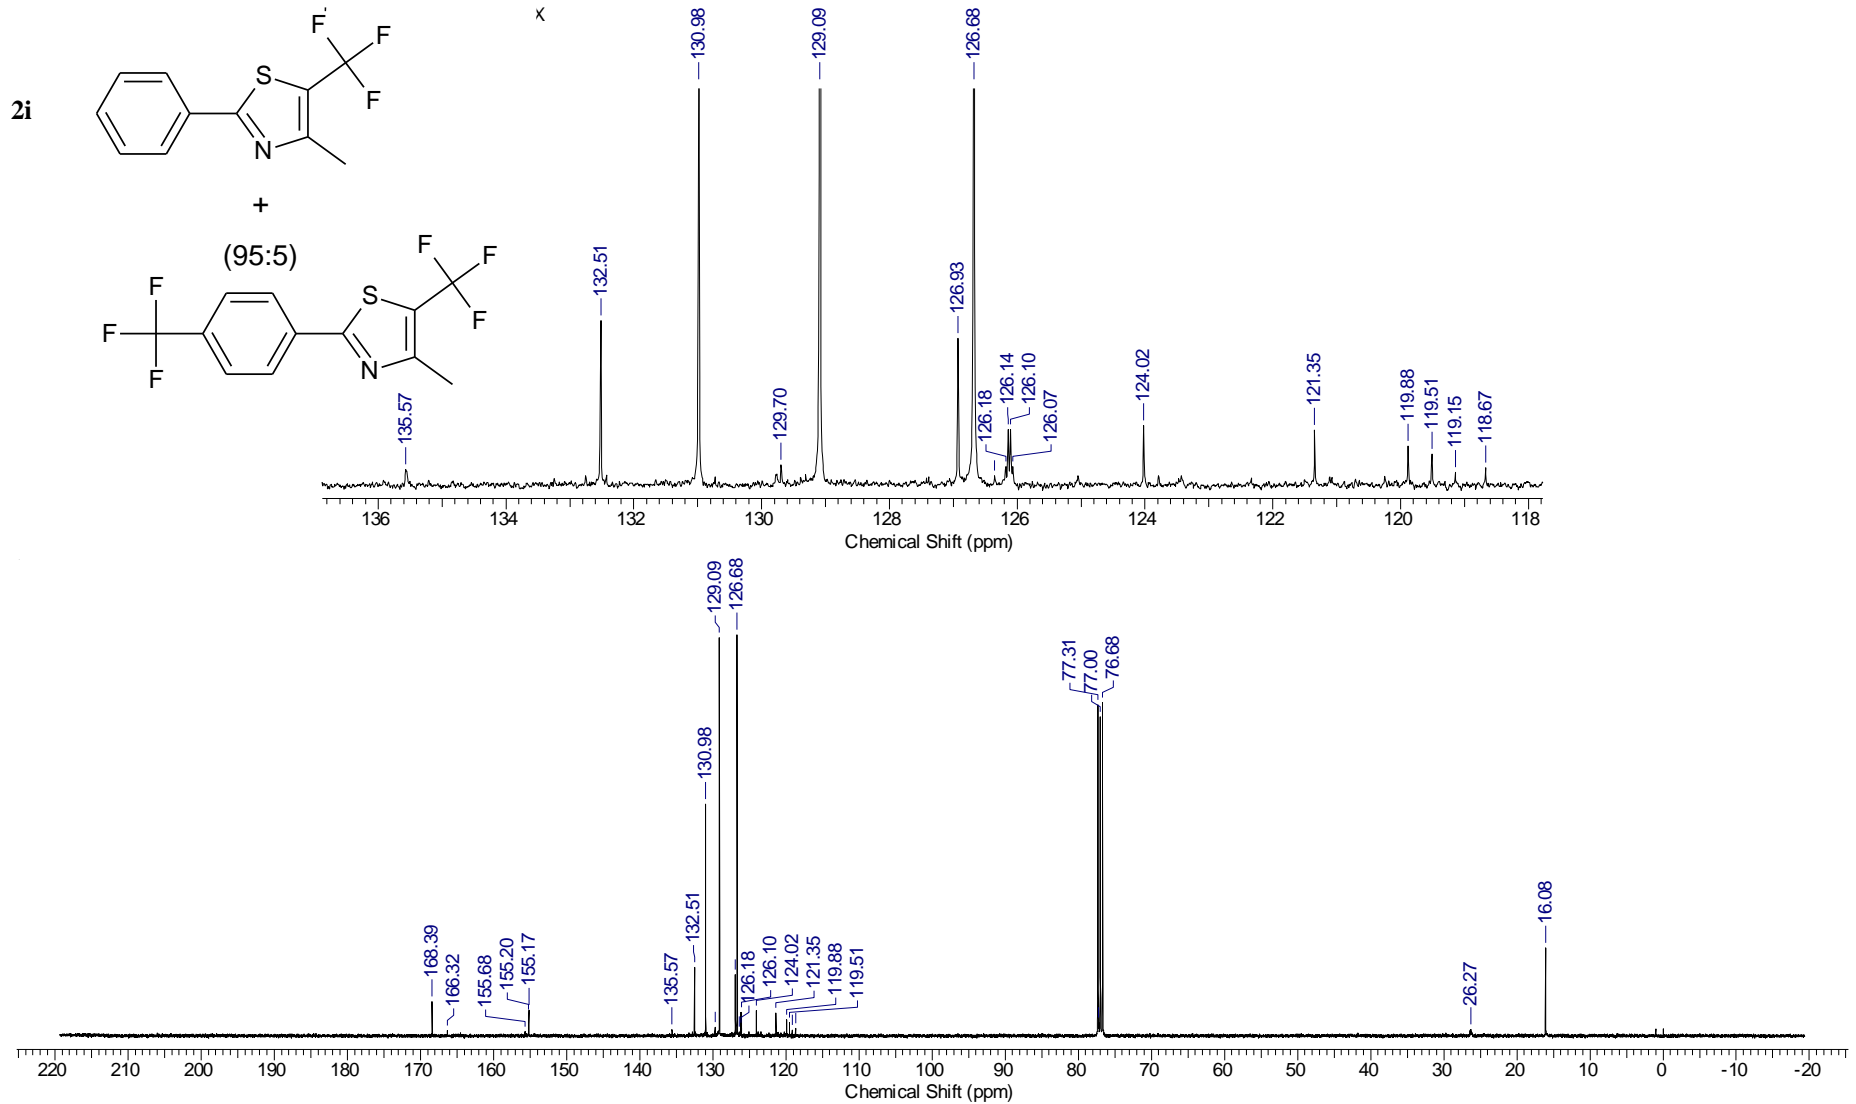

|                       |              |                      |                |                      |          |                        |                     |
|-----------------------|--------------|----------------------|----------------|----------------------|----------|------------------------|---------------------|
| Frequency (MHz)       | 100.69       | Nucleus              | 13C Dent 135   | Number of Transients | 256      | Origin                 | Bruker BioSpin GmbH |
| Original Points Count | 32768        | Owner                | tibbe_operator | Points Count         | 32768    | SW(cyclical) (Hz)      | 24037.73            |
| Solvent               | CHLOROFORM-d | Spectrum Offset (Hz) | 10066.5693     | Sweep Width (Hz)     | 24036.99 | Temperature (degree C) | 27.000              |

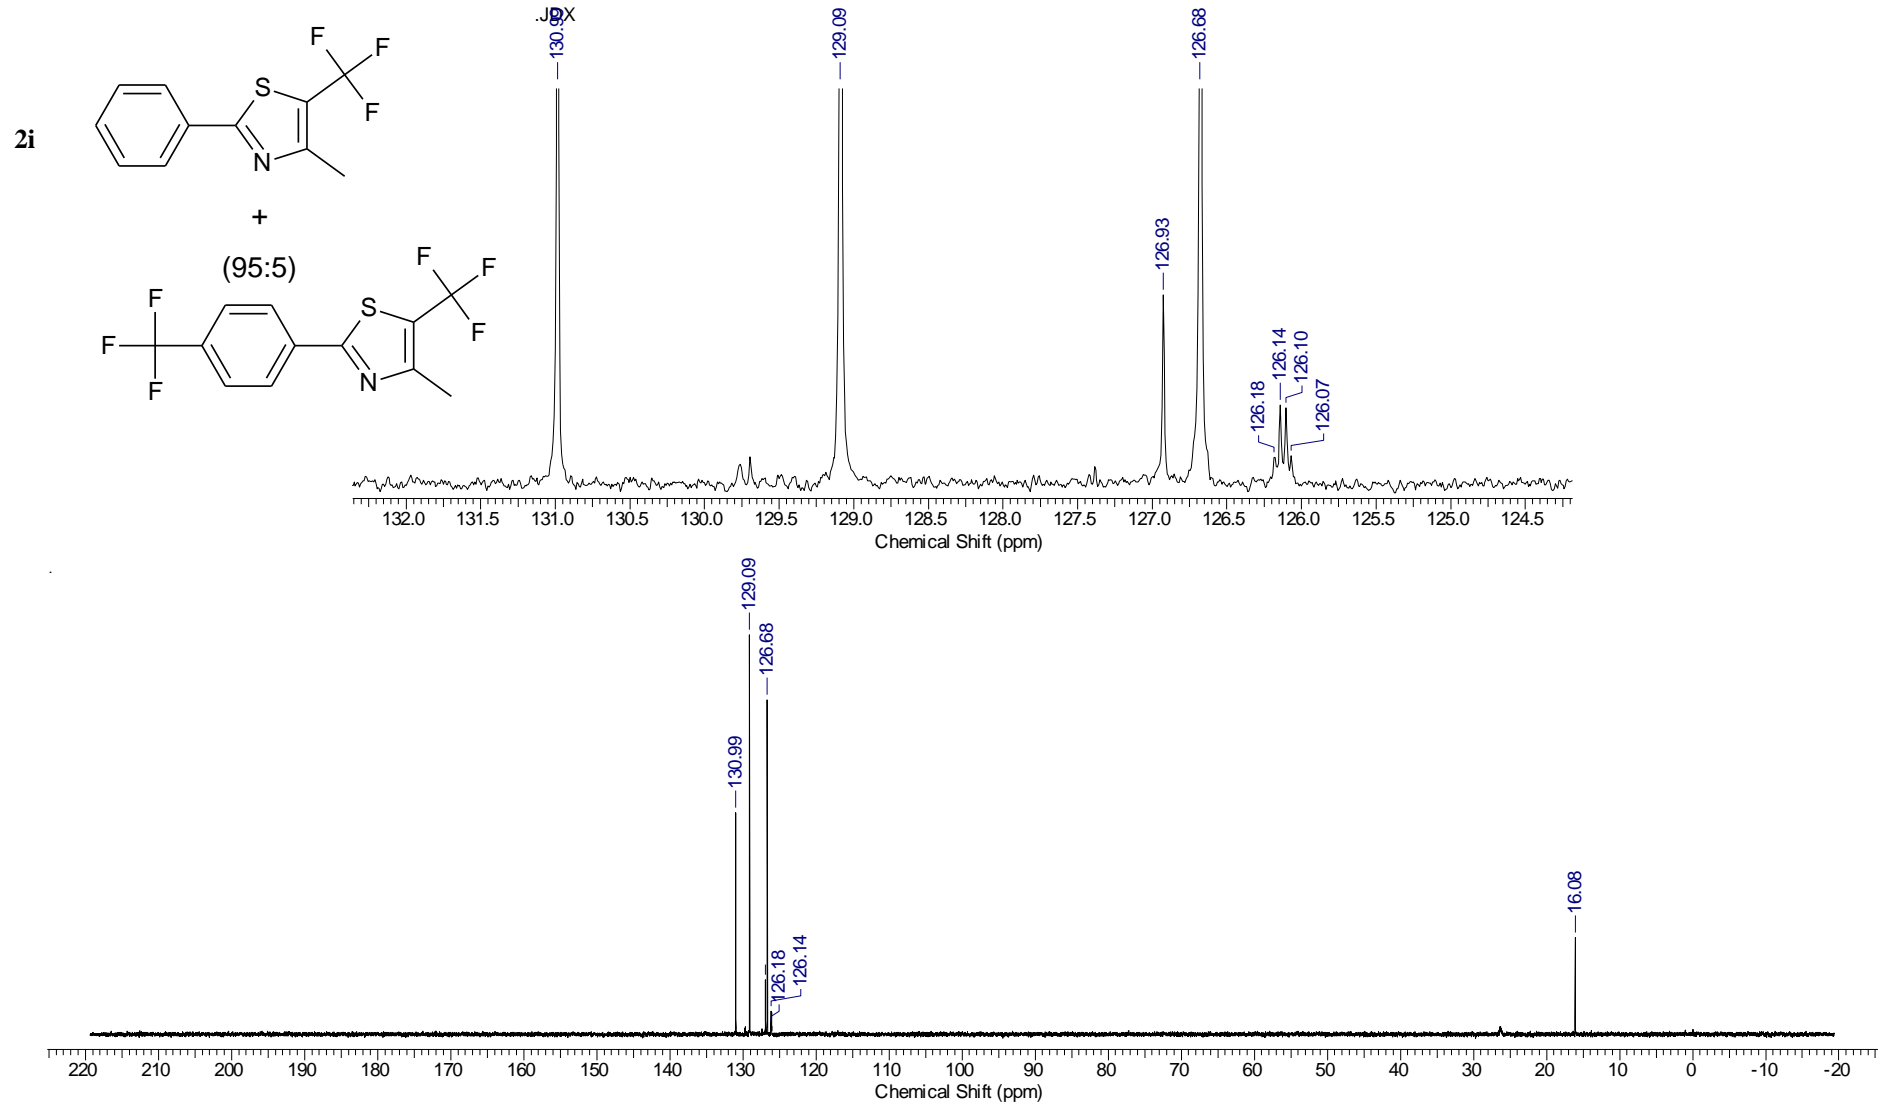

|                       |              |                      |                 |                      |          |                        |                     |
|-----------------------|--------------|----------------------|-----------------|----------------------|----------|------------------------|---------------------|
| Frequency (MHz)       | 376.71       | Nucleus              | <sup>19</sup> F | Number of Transients | 64       | Origin                 | Bruker BioSpin GmbH |
| Original Points Count | 131072       | Owner                | tibbe_operator  | Points Count         | 131072   | SW(cyclical) (Hz)      | 93749.28            |
| Solvent               | CHLOROFORM-d | Spectrum Offset (Hz) | -37711.9258     | Sweep Width (Hz)     | 93748.56 | Temperature (degree C) | 27.000              |

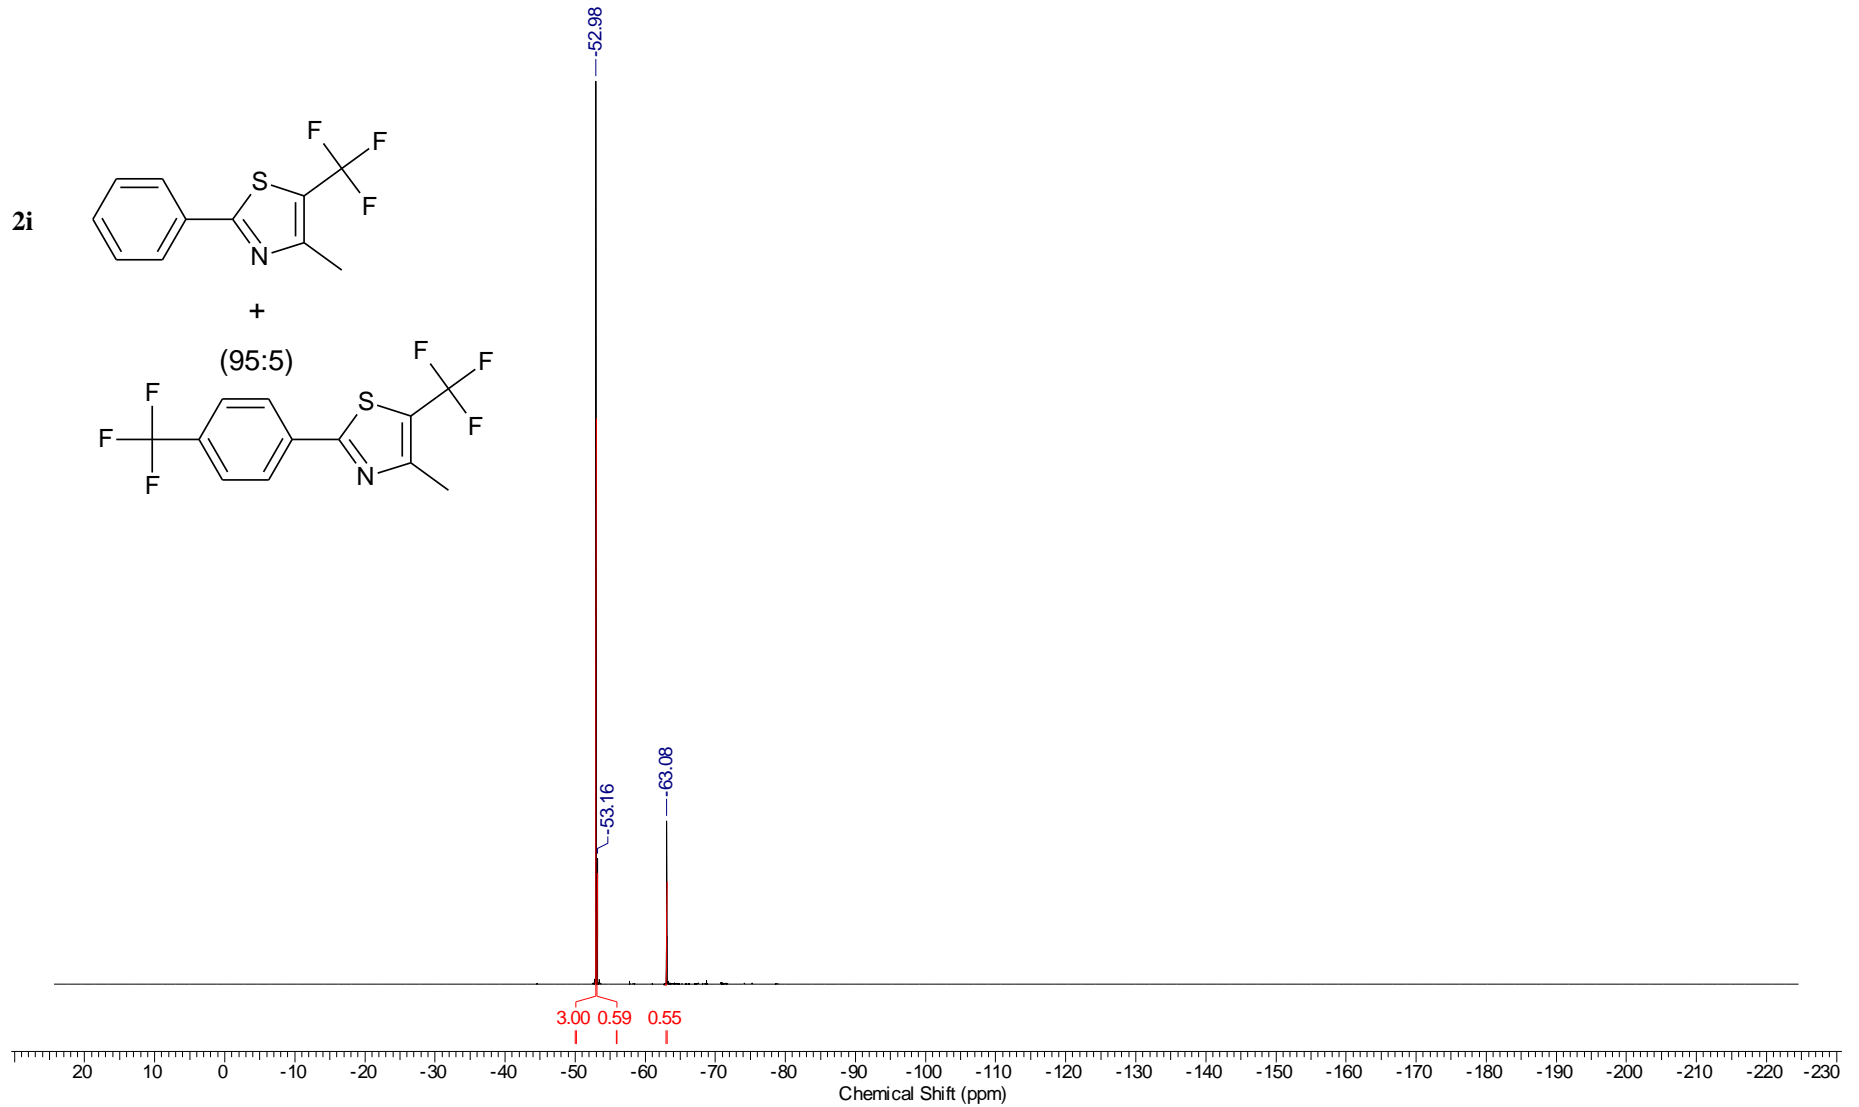

|                       |              |                      |                 |                      |          |                        |                     |
|-----------------------|--------------|----------------------|-----------------|----------------------|----------|------------------------|---------------------|
| Frequency (MHz)       | 376.71       | Nucleus              | <sup>19</sup> F | Number of Transients | 64       | Origin                 | Bruker BioSpin GmbH |
| Original Points Count | 131072       | Owner                | tibbe_operator  | Points Count         | 131072   | SW(cyclical) (Hz)      | 89285.03            |
| Solvent               | CHLOROFORM-d | Spectrum Offset (Hz) | -37401.6406     | Sweep Width (Hz)     | 89284.35 | Temperature (degree C) | 27.000              |

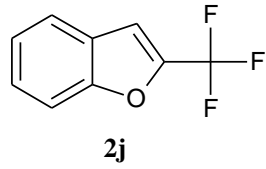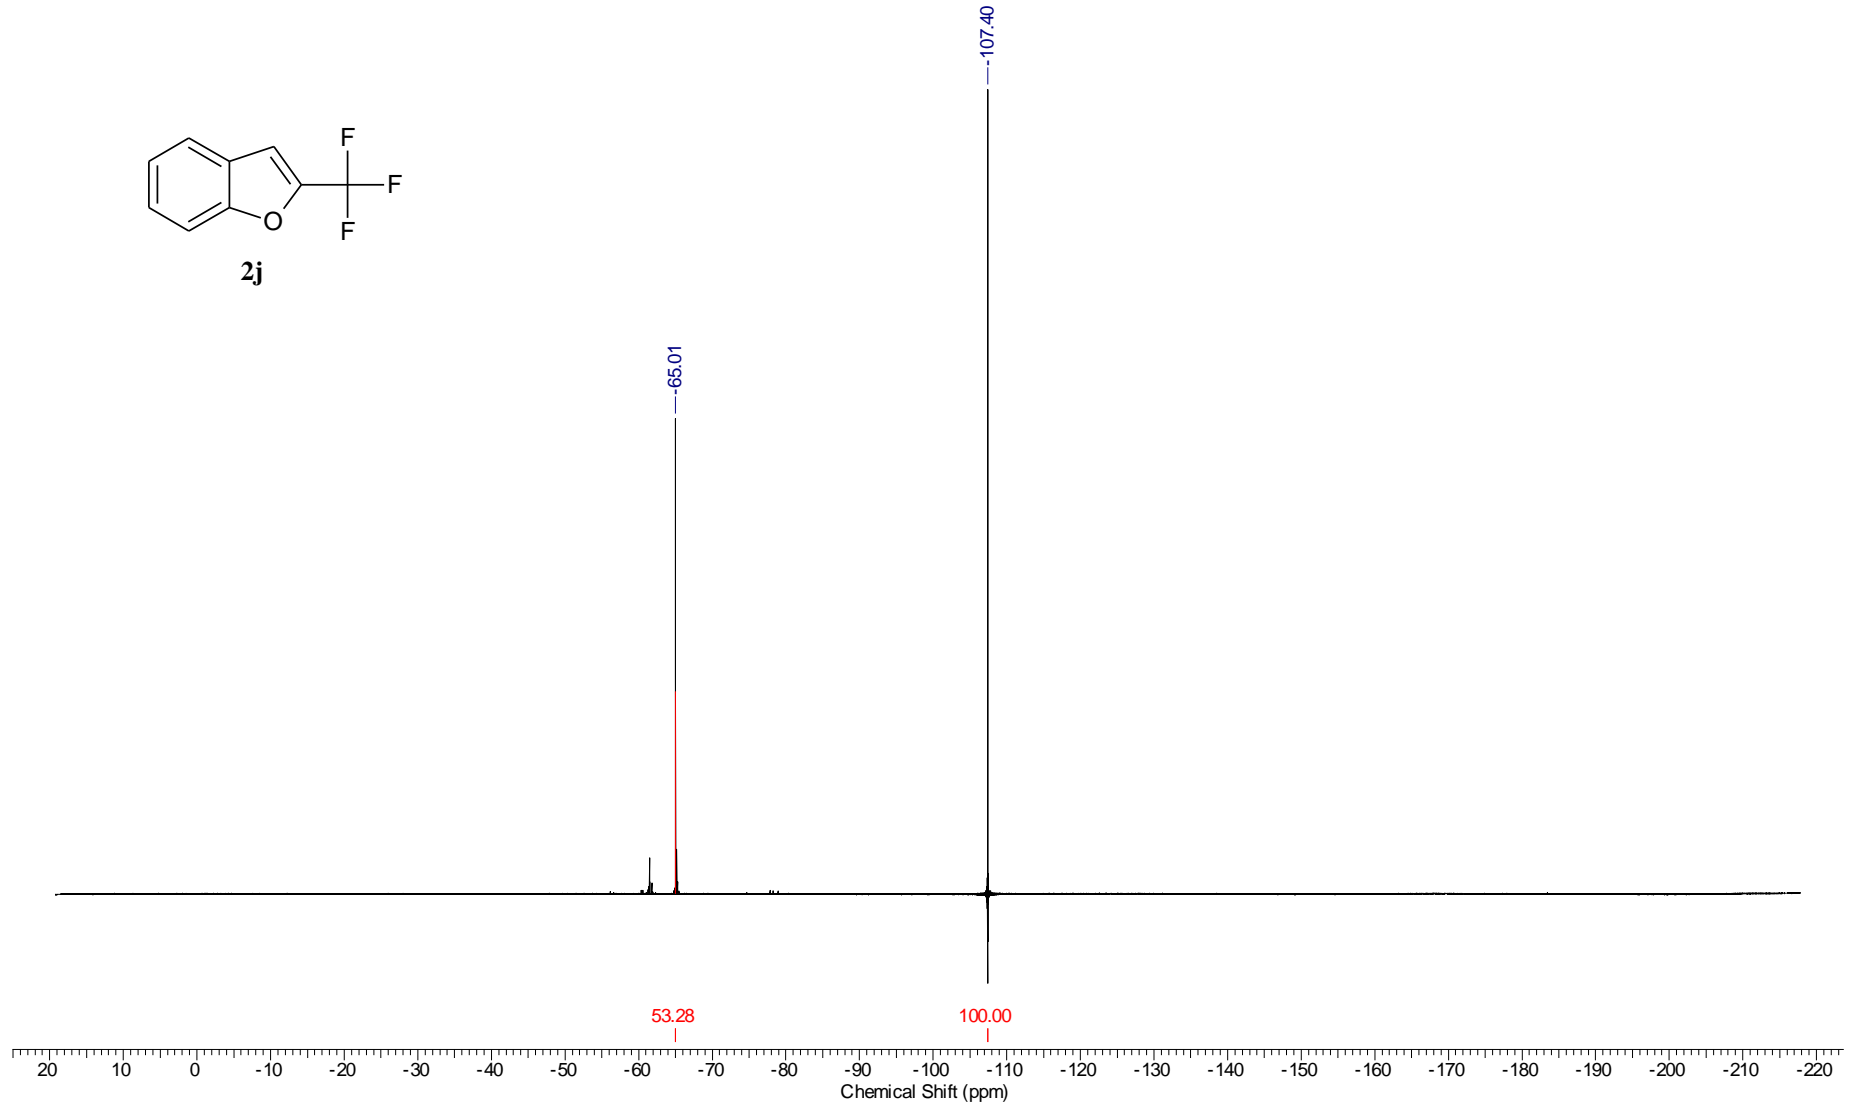

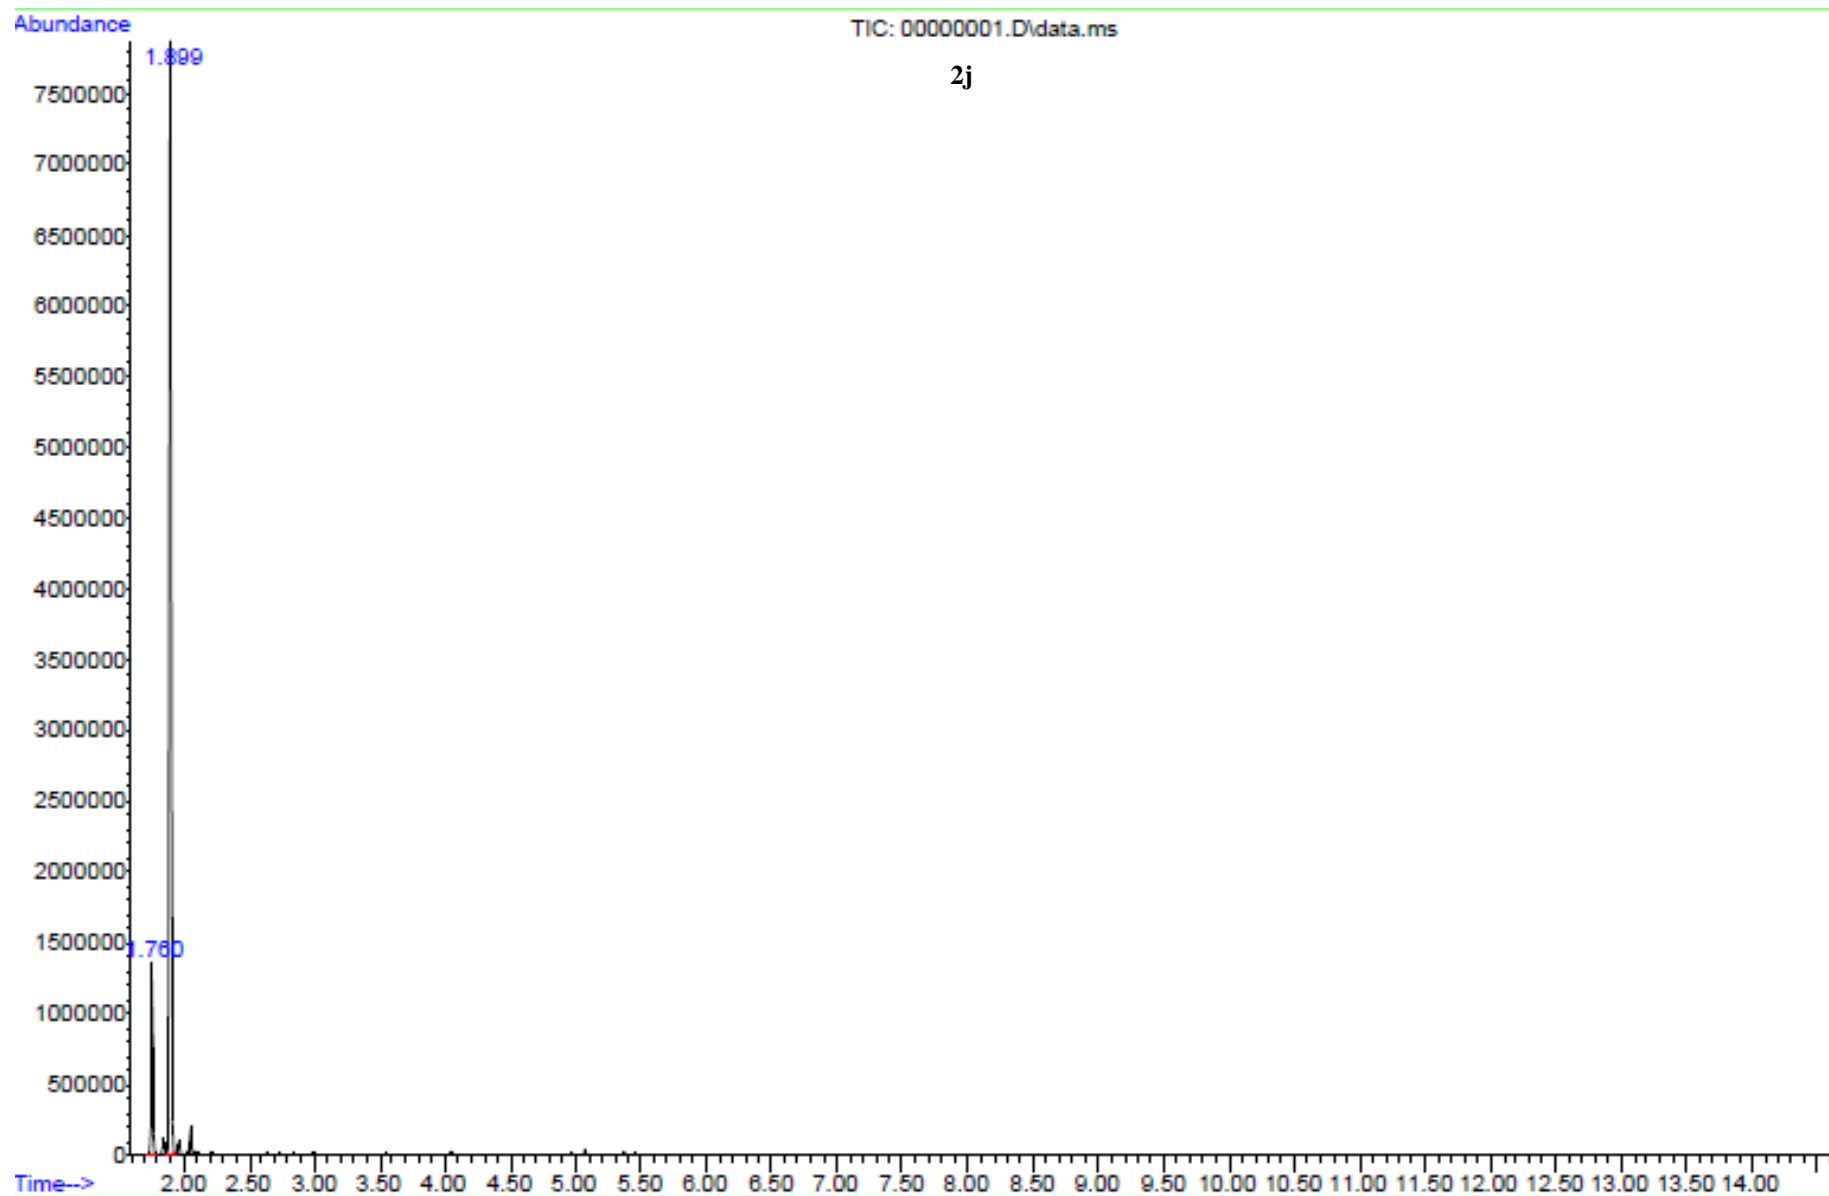

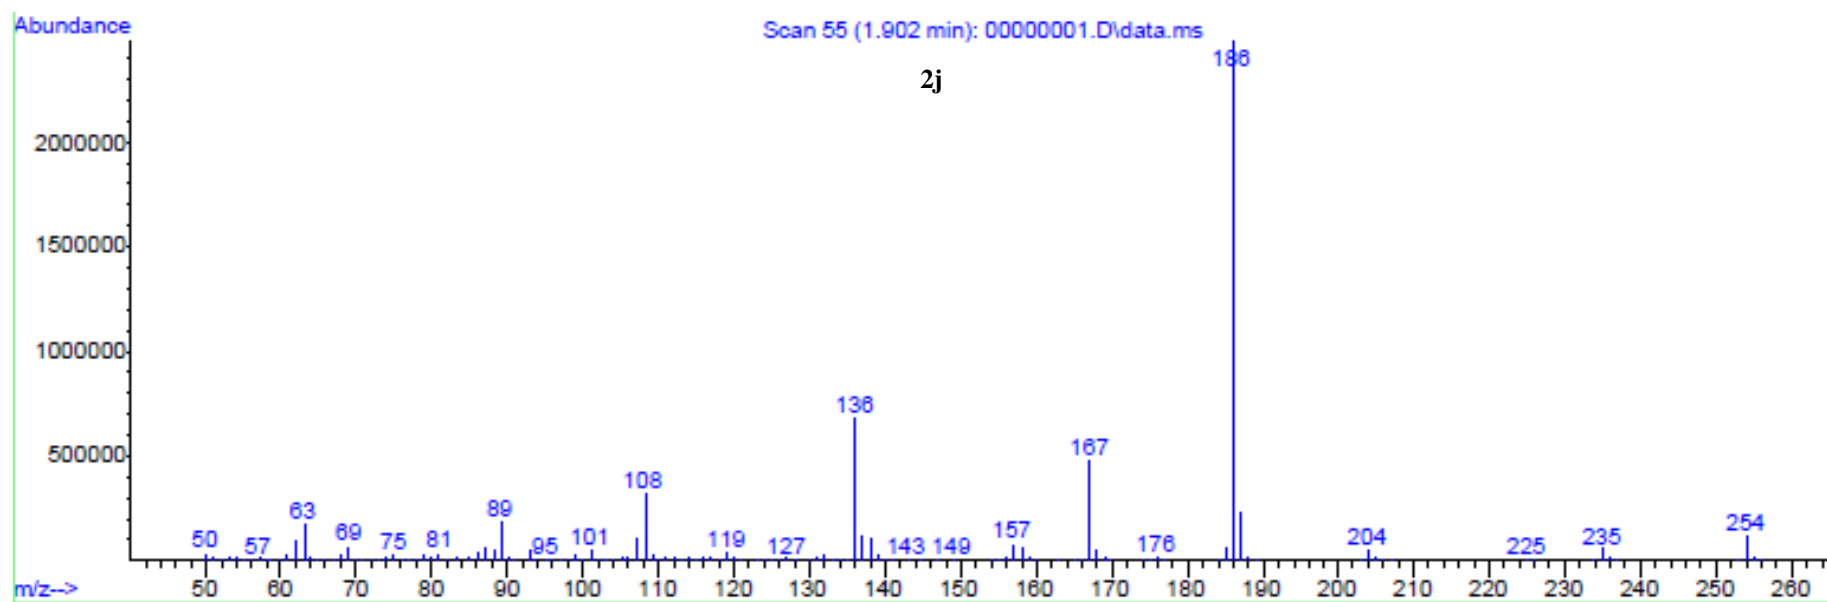

|                       |              |                      |                 |                      |          |                        |                     |
|-----------------------|--------------|----------------------|-----------------|----------------------|----------|------------------------|---------------------|
| Frequency (MHz)       | 376.71       | Nucleus              | <sup>19</sup> F | Number of Transients | 64       | Origin                 | Bruker BioSpin GmbH |
| Original Points Count | 131072       | Owner                | tibbe_operator  | Points Count         | 131072   | SW(cyclical) (Hz)      | 93749.28            |
| Solvent               | CHLOROFORM-d | Spectrum Offset (Hz) | -37375.3594     | Sweep Width (Hz)     | 93748.56 | Temperature (degree C) | 27.000              |

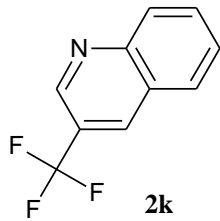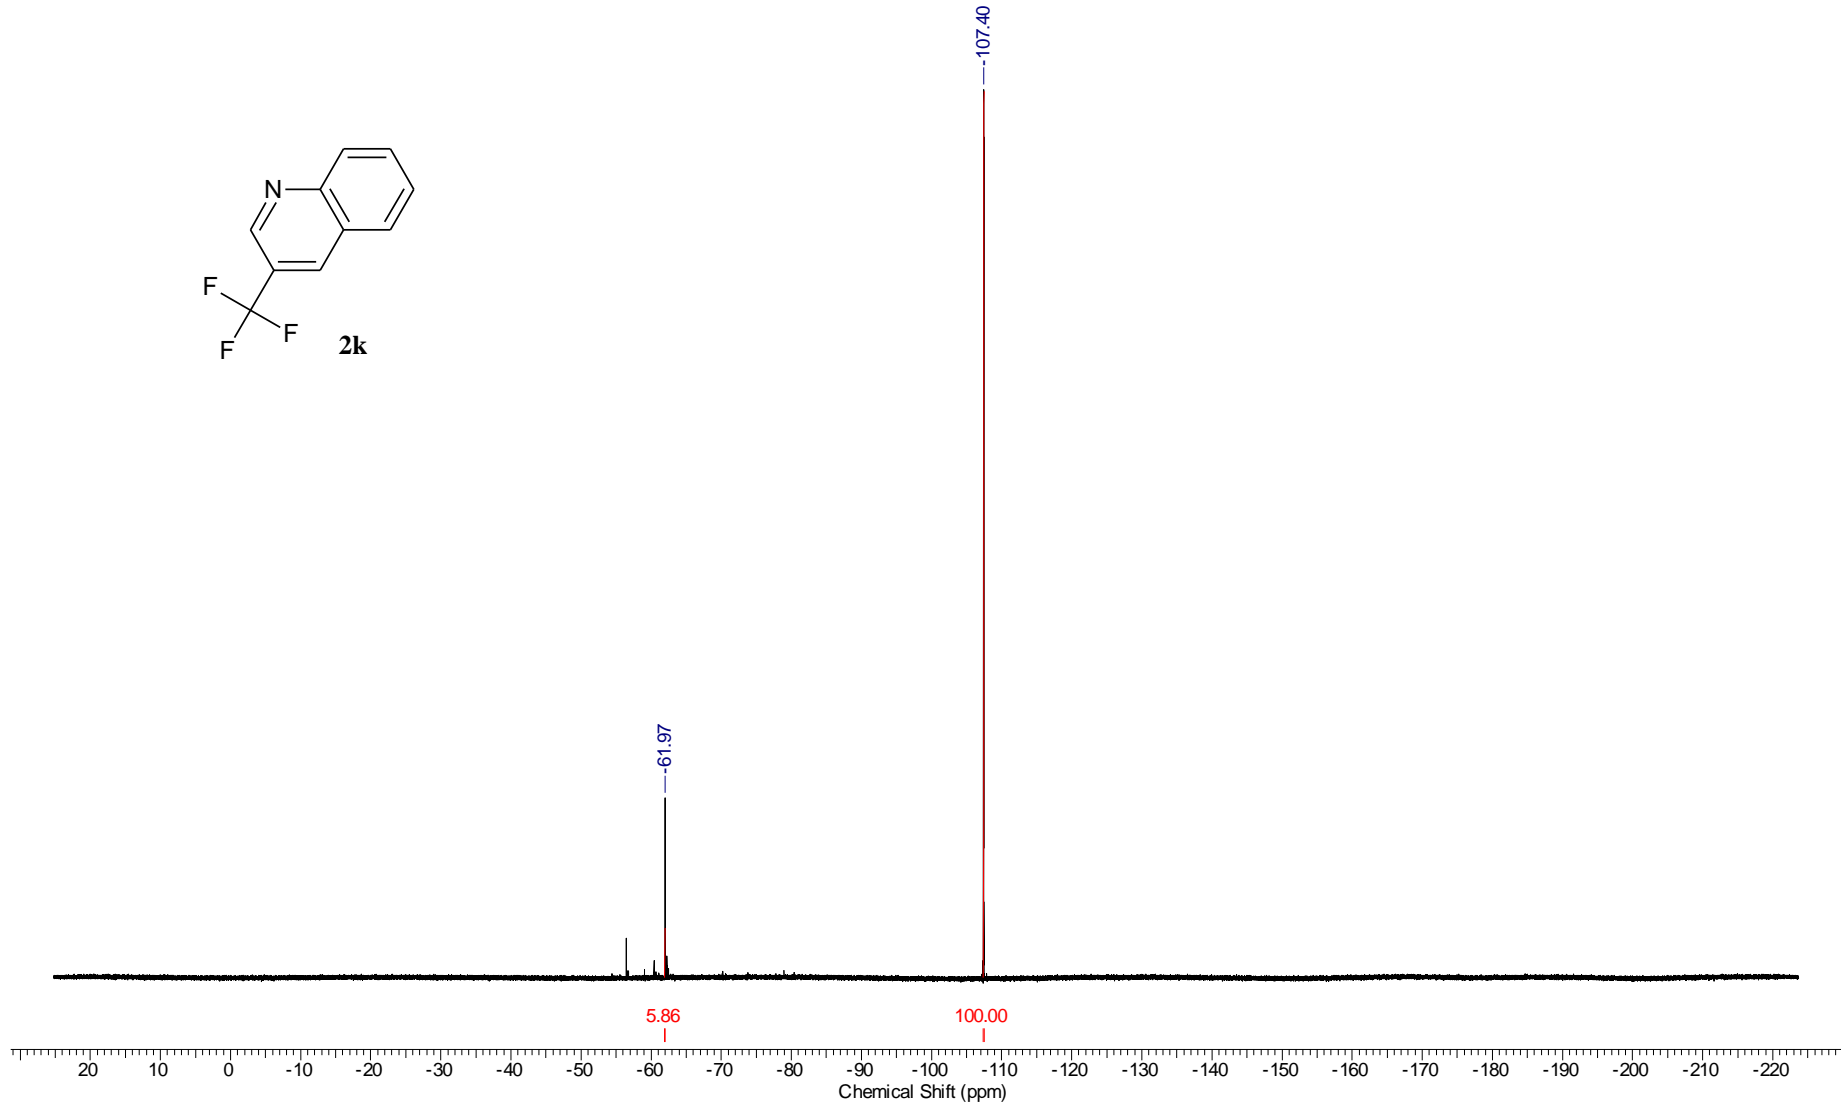



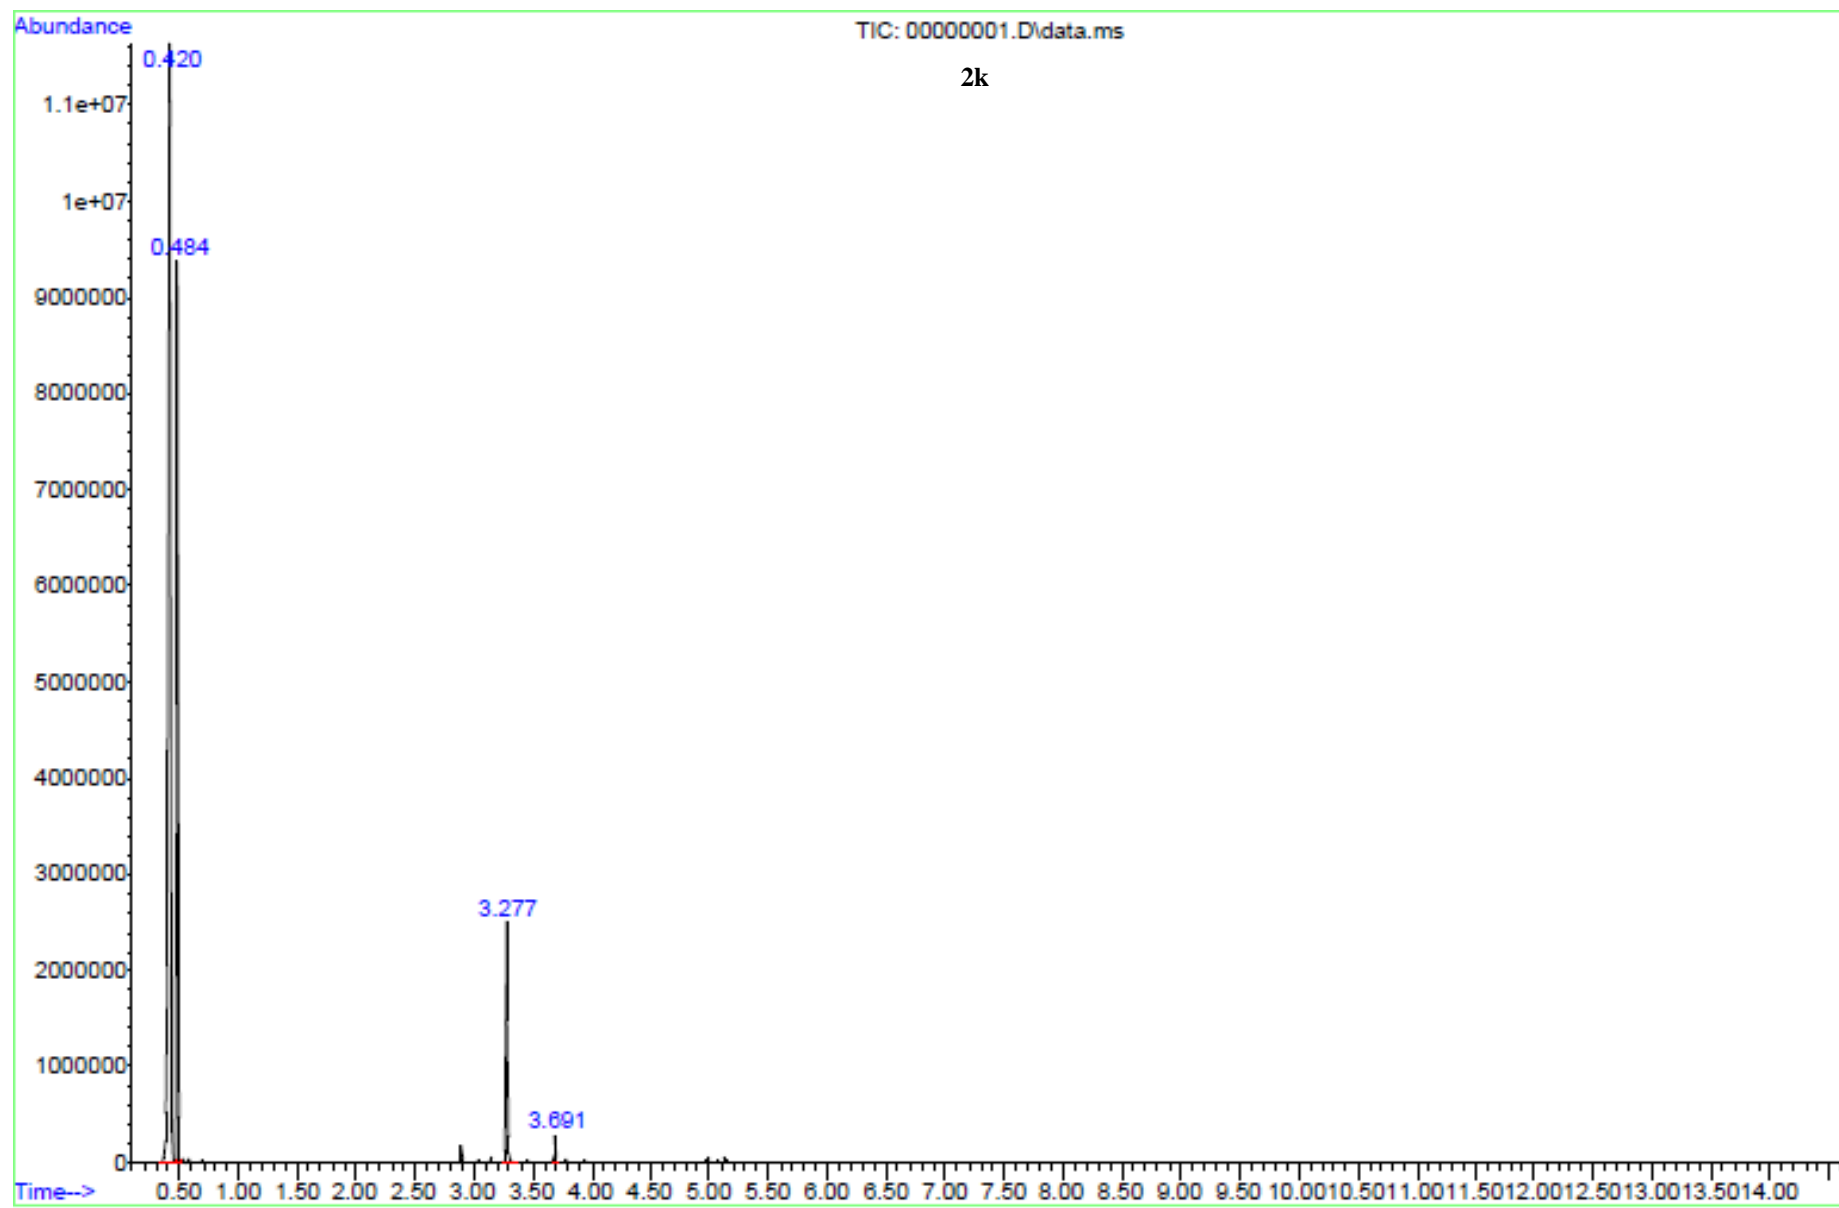

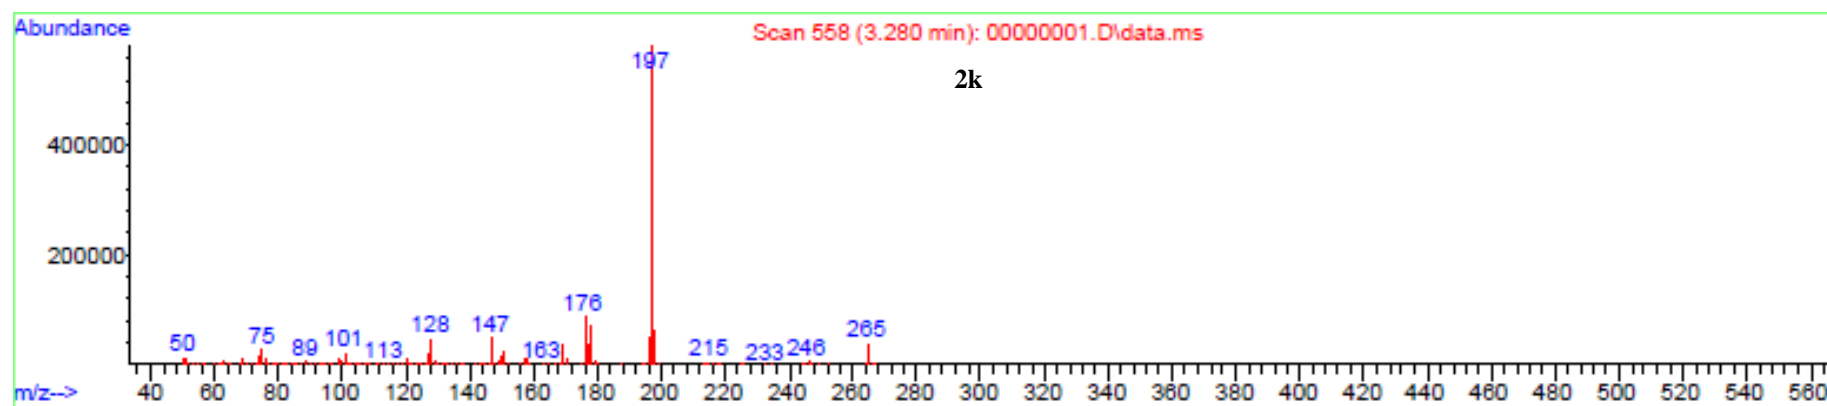

|                              |              |                             |                 |                             |          |                               |                     |
|------------------------------|--------------|-----------------------------|-----------------|-----------------------------|----------|-------------------------------|---------------------|
| <b>Frequency (MHz)</b>       | 376.71       | <b>Nucleus</b>              | <sup>19</sup> F | <b>Number of Transients</b> | 64       | <b>Origin</b>                 | Bruker BioSpin GmbH |
| <b>Original Points Count</b> | 131072       | <b>Owner</b>                | tibbe_operator  | <b>Points Count</b>         | 131072   | <b>SW(cyclical) (Hz)</b>      | 89285.03            |
| <b>Solvent</b>               | CHLOROFORM-d | <b>Spectrum Offset (Hz)</b> | -37328.0703     | <b>Sweep Width (Hz)</b>     | 89284.35 | <b>Temperature (degree C)</b> | 27.000              |

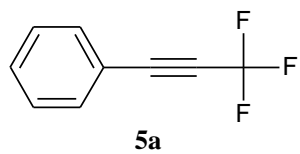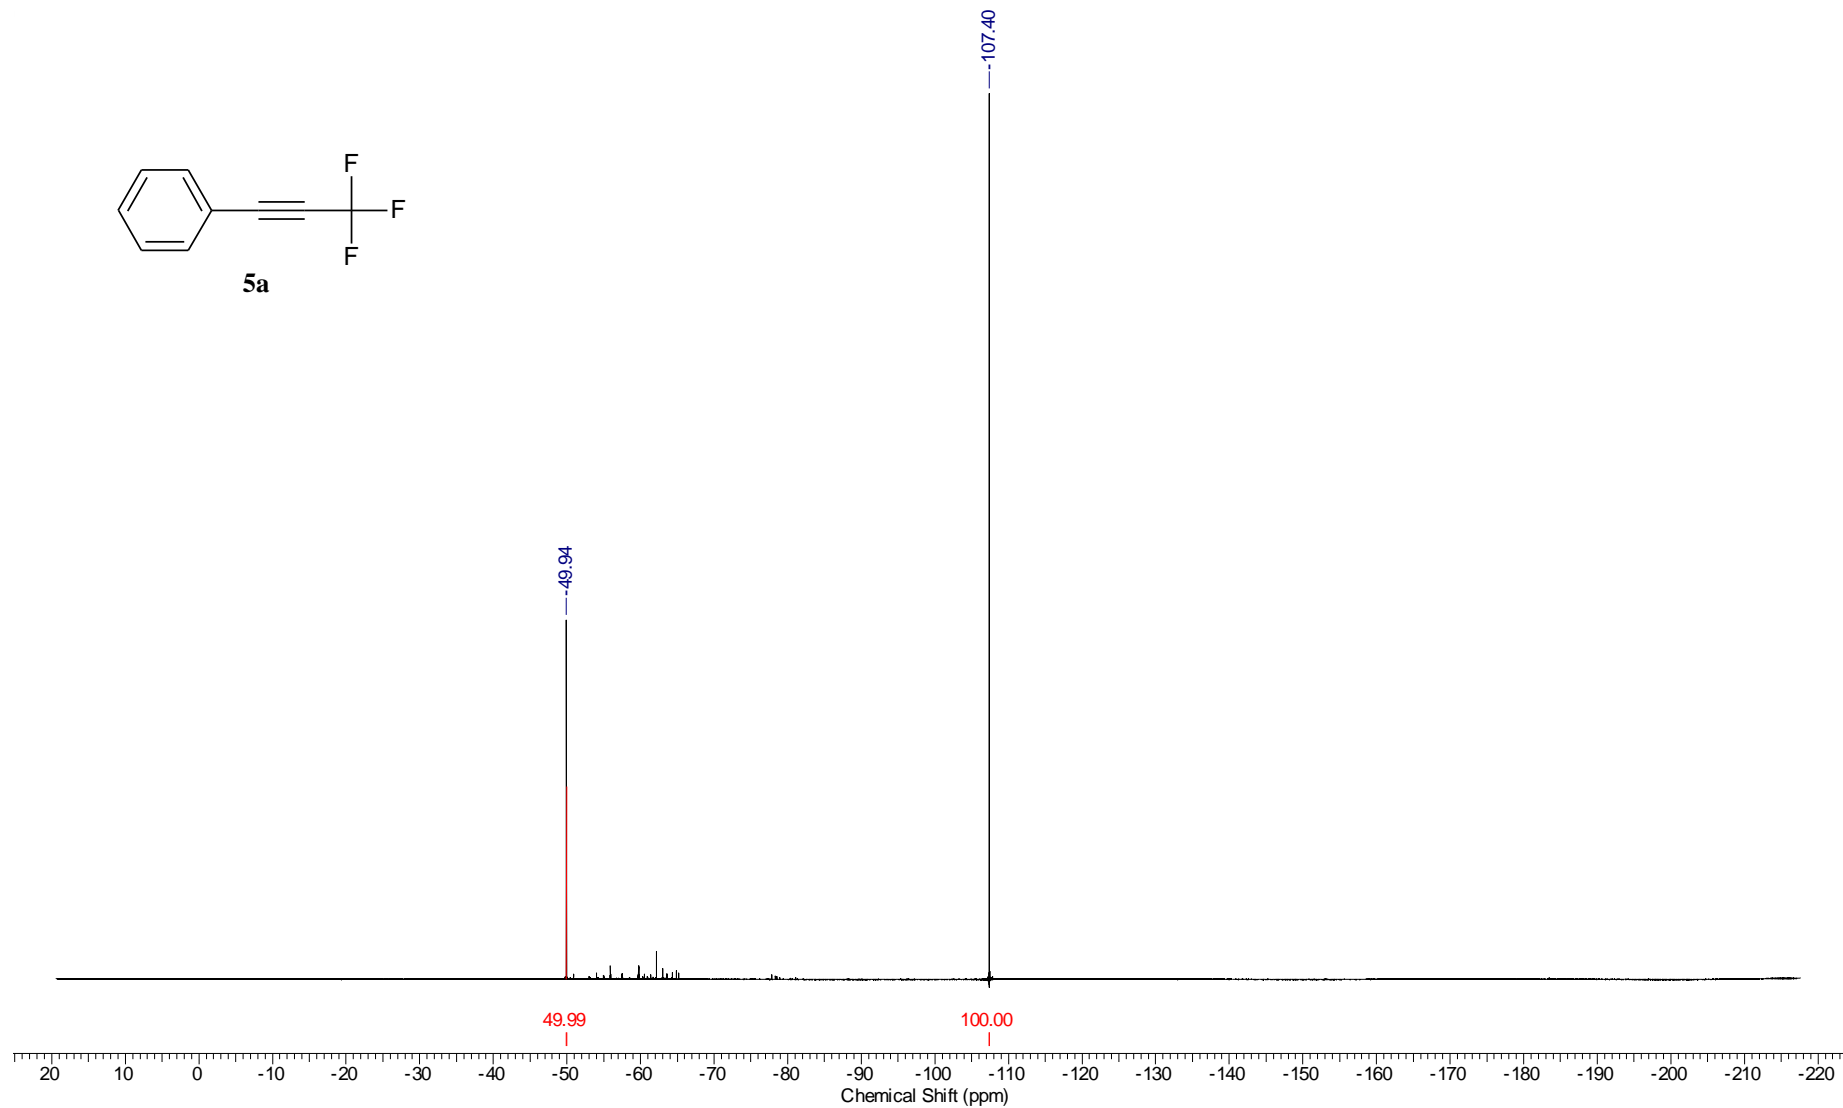

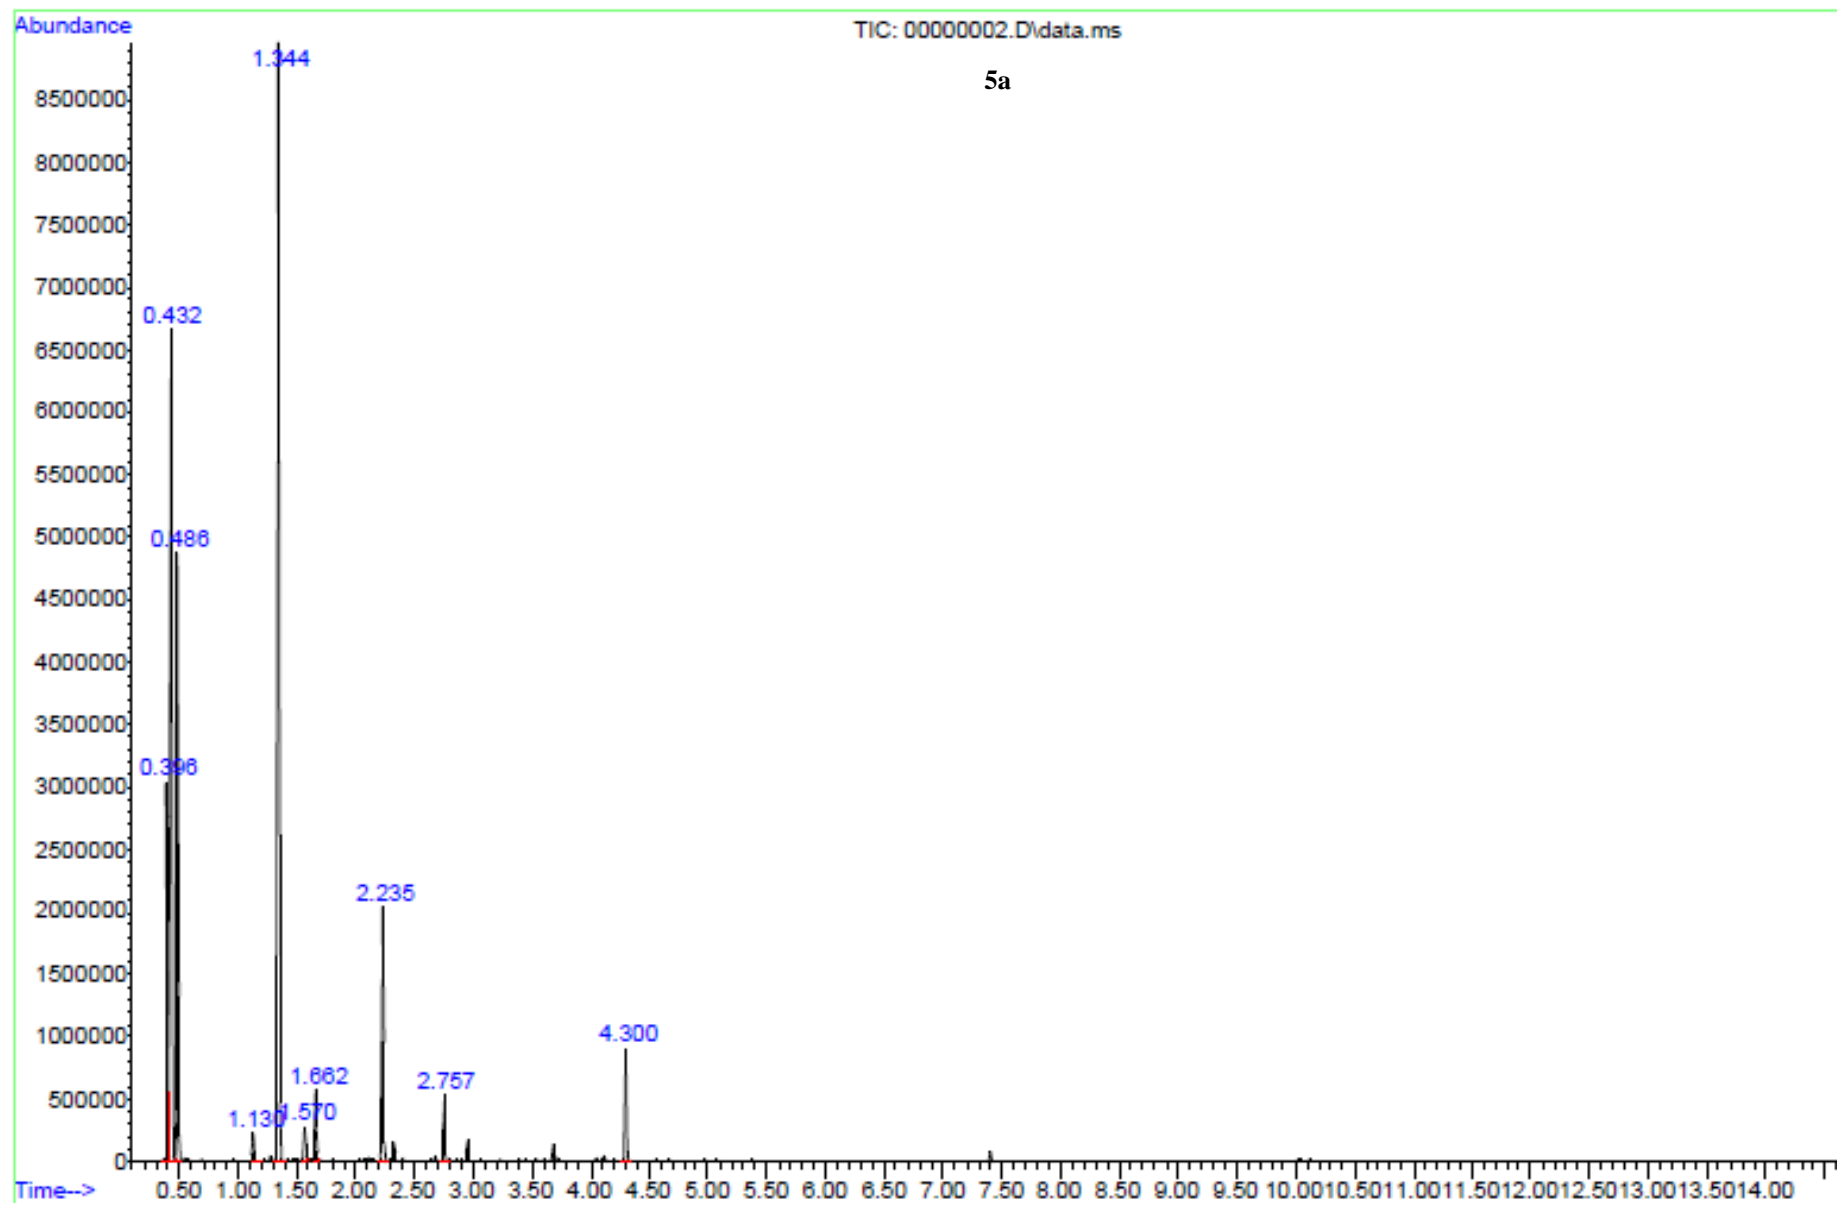

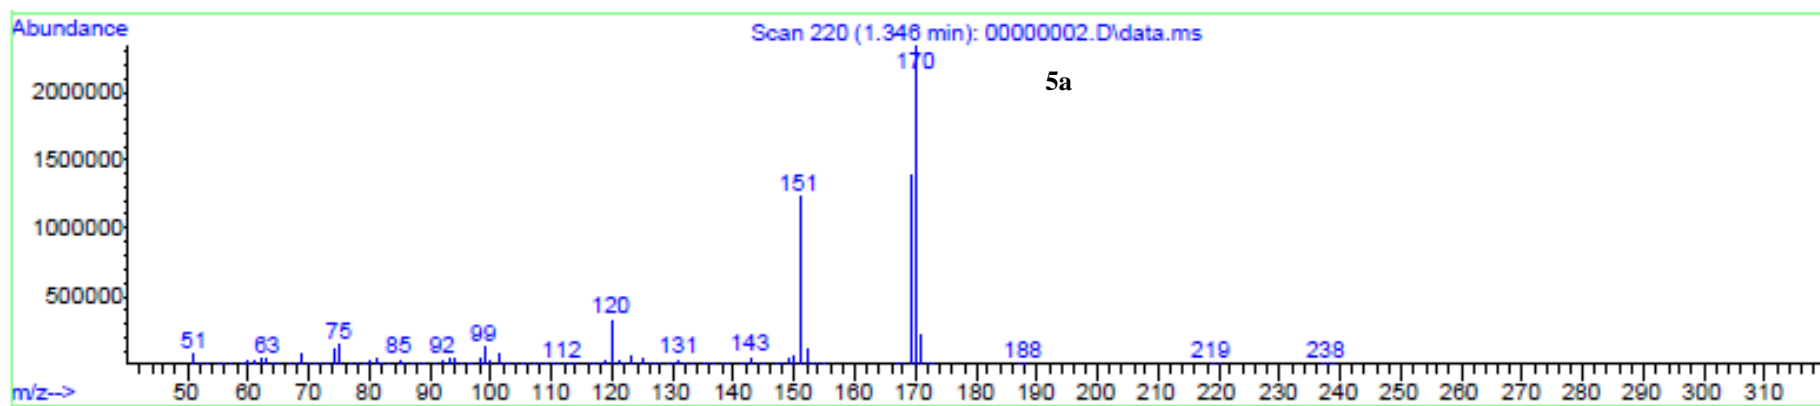

|                              |              |                             |                 |                             |          |                               |                     |
|------------------------------|--------------|-----------------------------|-----------------|-----------------------------|----------|-------------------------------|---------------------|
| <b>Frequency (MHz)</b>       | 376.71       | <b>Nucleus</b>              | <sup>19</sup> F | <b>Number of Transients</b> | 64       | <b>Origin</b>                 | Bruker BioSpin GmbH |
| <b>Original Points Count</b> | 131072       | <b>Owner</b>                | tibbe_operator  | <b>Points Count</b>         | 131072   | <b>SW(cyclical) (Hz)</b>      | 93749.28            |
| <b>Solvent</b>               | CHLOROFORM-d | <b>Spectrum Offset (Hz)</b> | -37386.0859     | <b>Sweep Width (Hz)</b>     | 93748.56 | <b>Temperature (degree C)</b> | 27.000              |

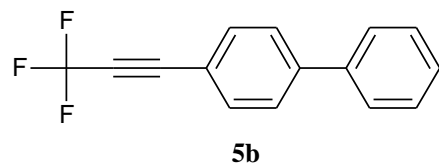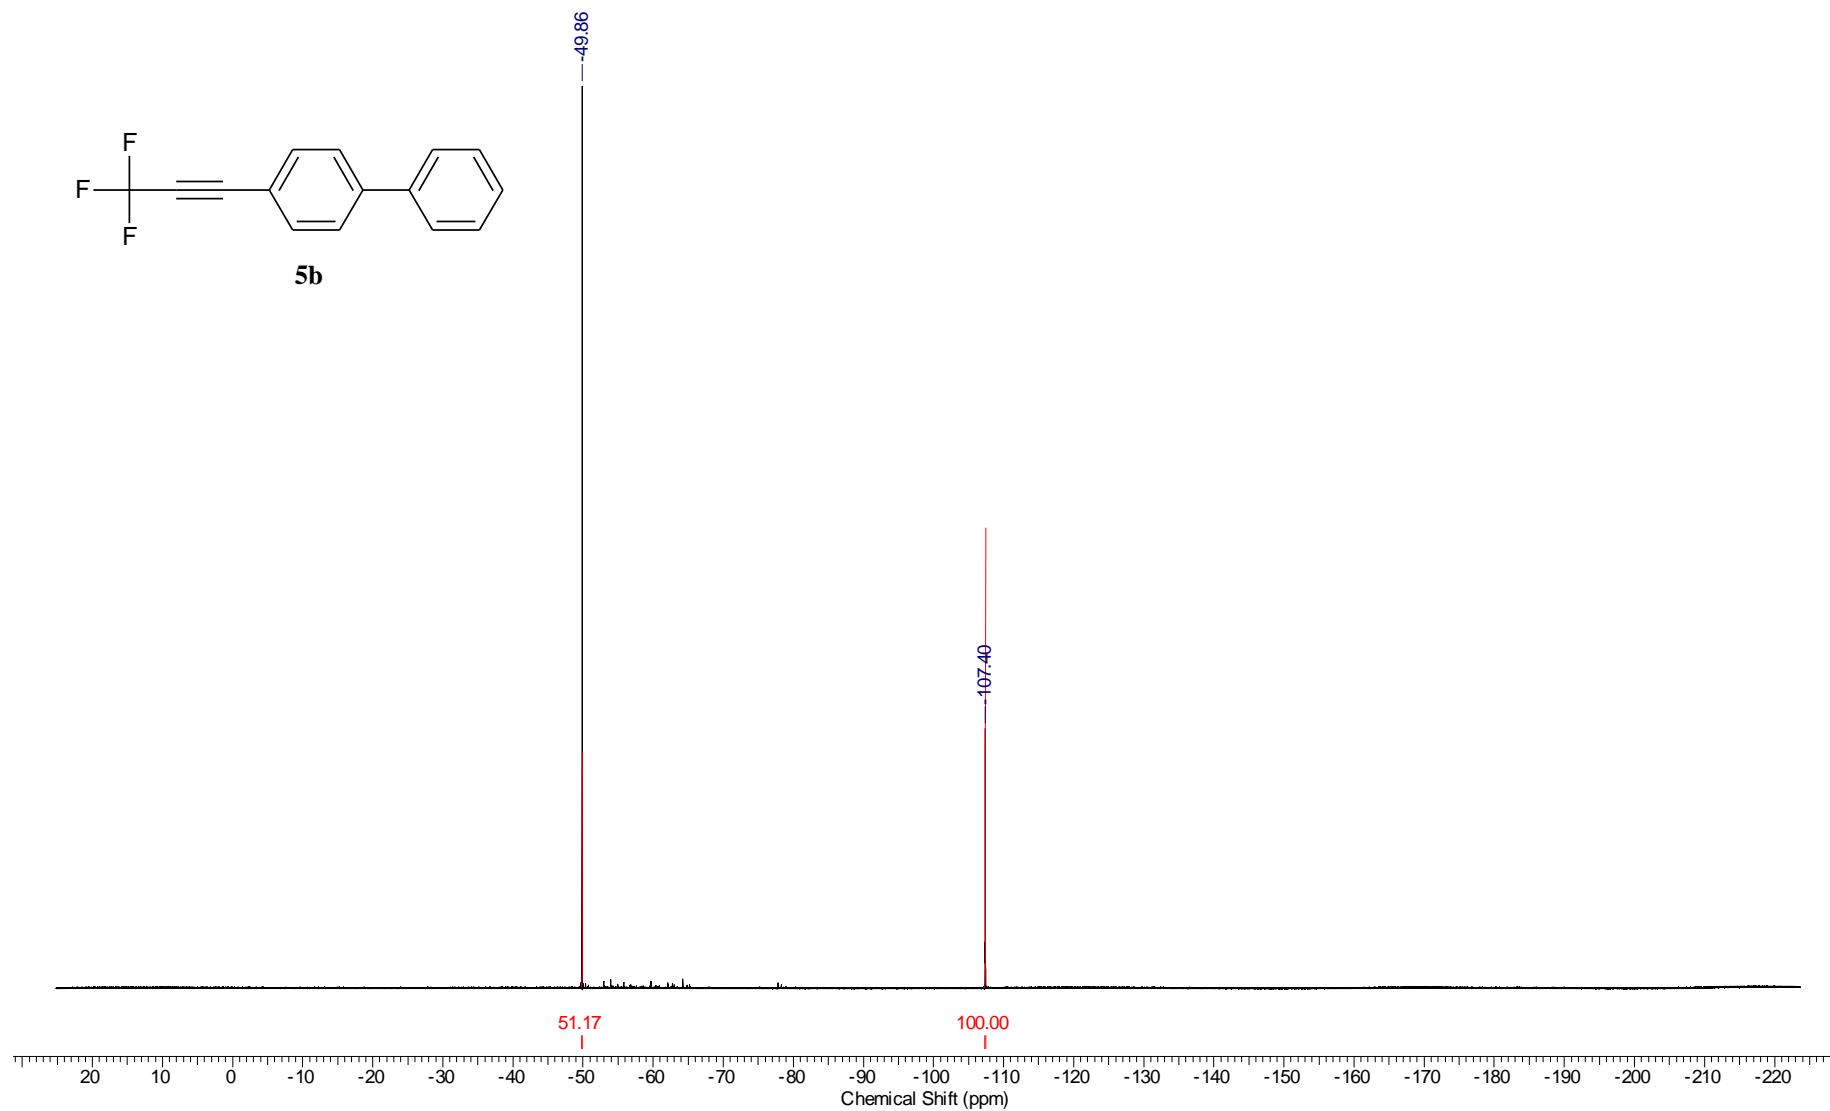

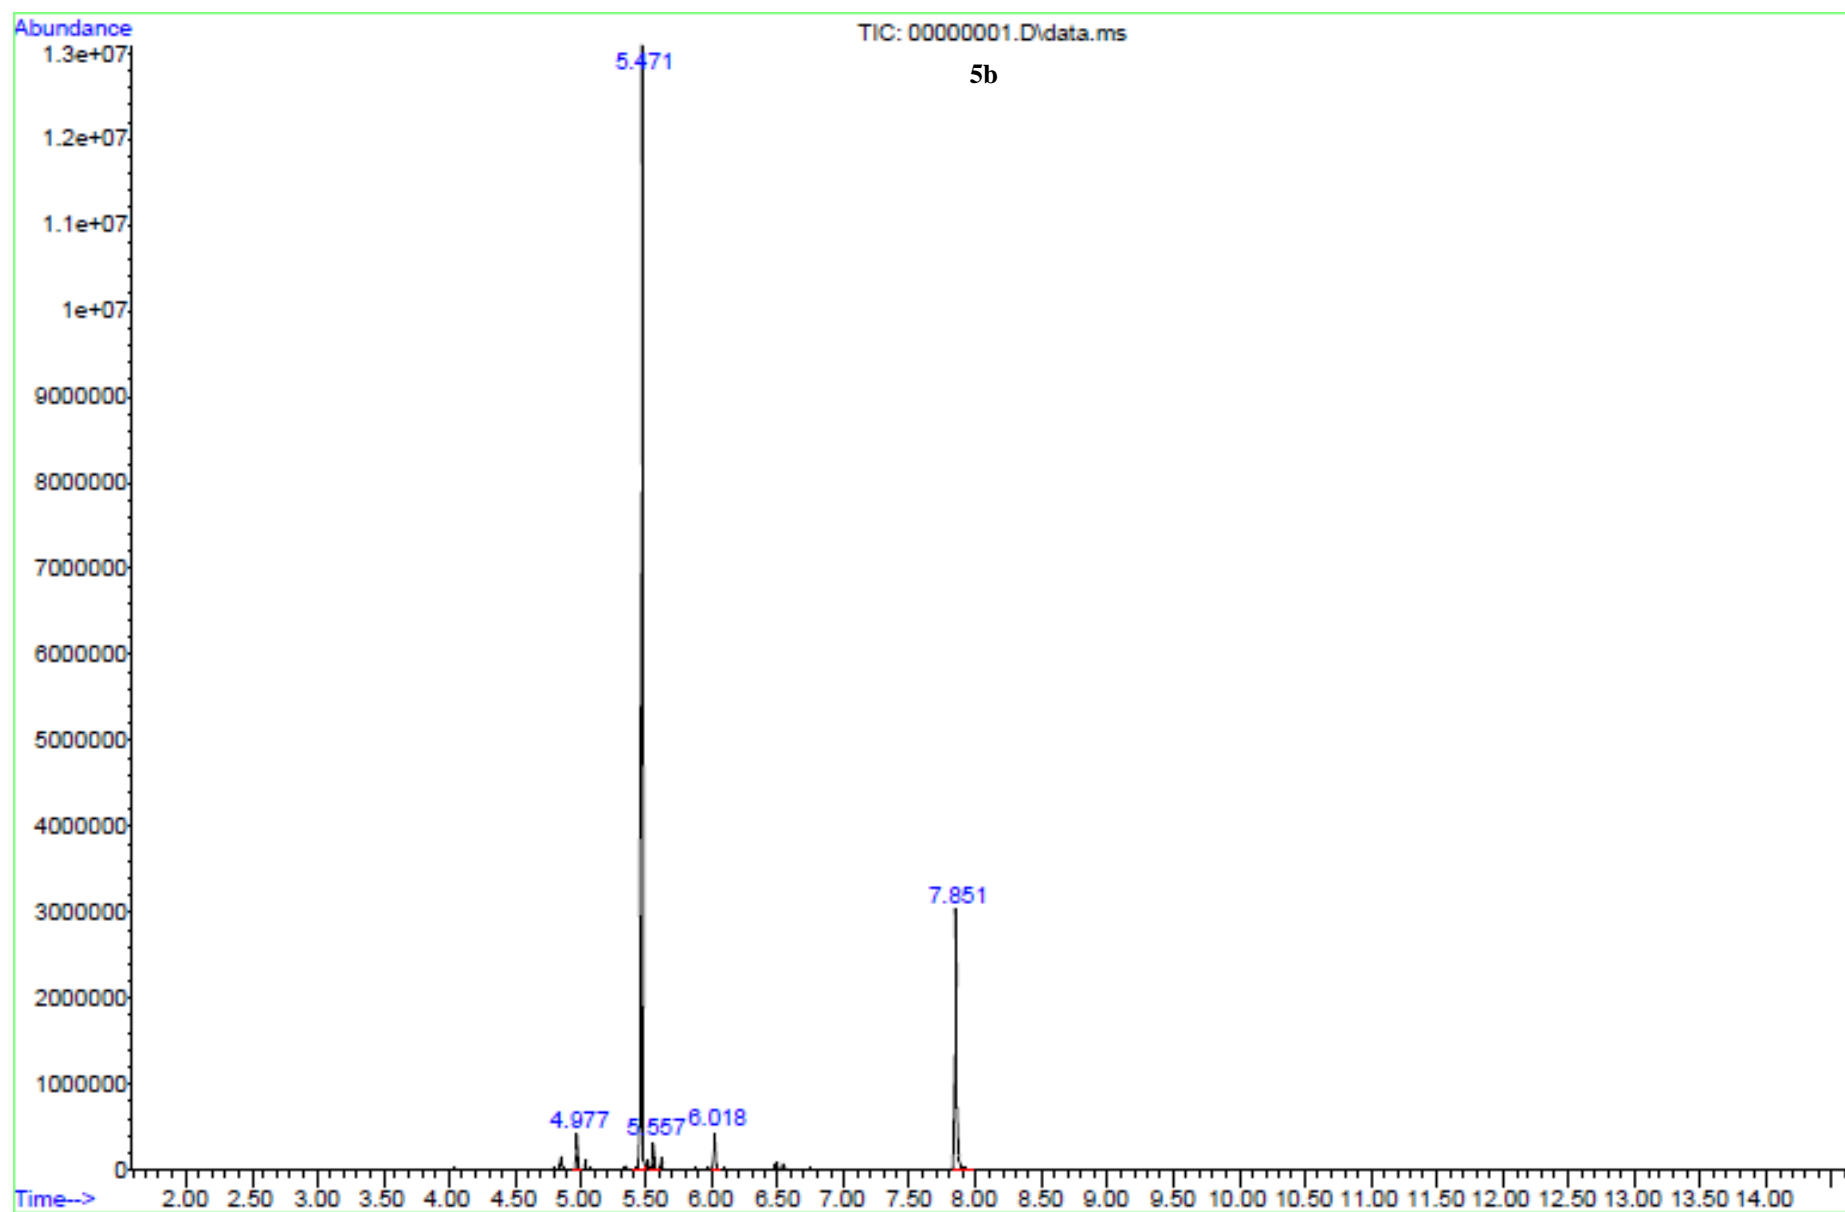

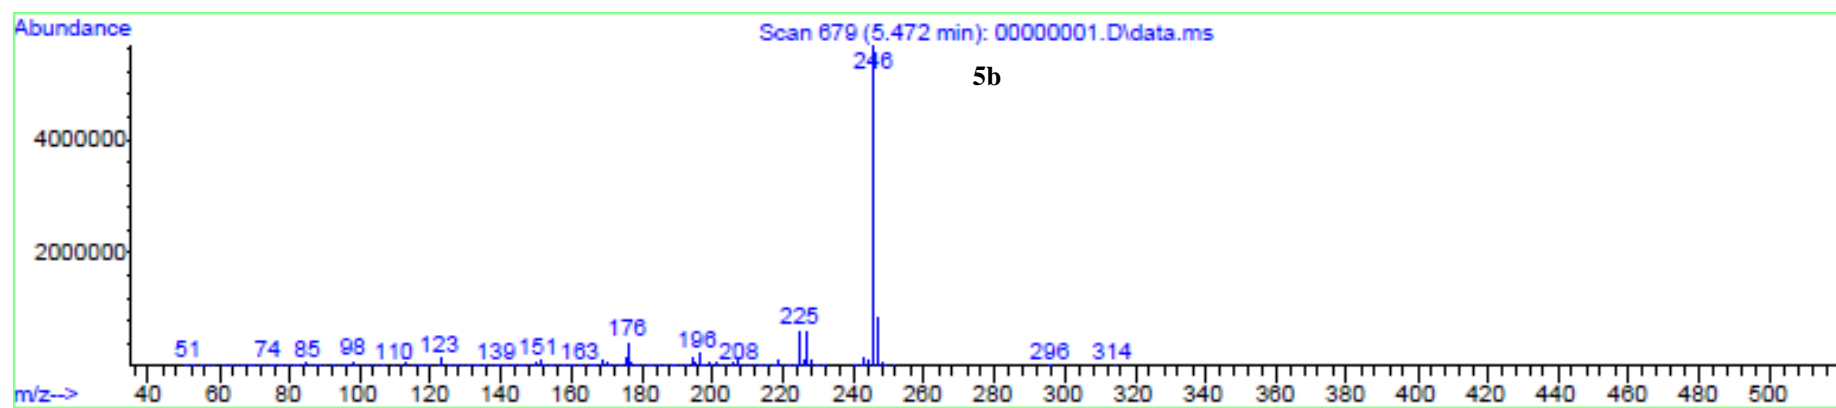



|                       |              |                      |                |                      |         |                        |                     |
|-----------------------|--------------|----------------------|----------------|----------------------|---------|------------------------|---------------------|
| Frequency (MHz)       | 400.40       | Nucleus              | 1H             | Number of Transients | 16      | Origin                 | Bruker BioSpin GmbH |
| Original Points Count | 32768        | Owner                | tibbe_operator | Points Count         | 32768   | SW(cyclical) (Hz)      | 7211.32             |
| Solvent               | CHLOROFORM-d | Spectrum Offset (Hz) | 3395.6414      | Sweep Width (Hz)     | 7211.10 | Temperature (degree C) | 27.000              |

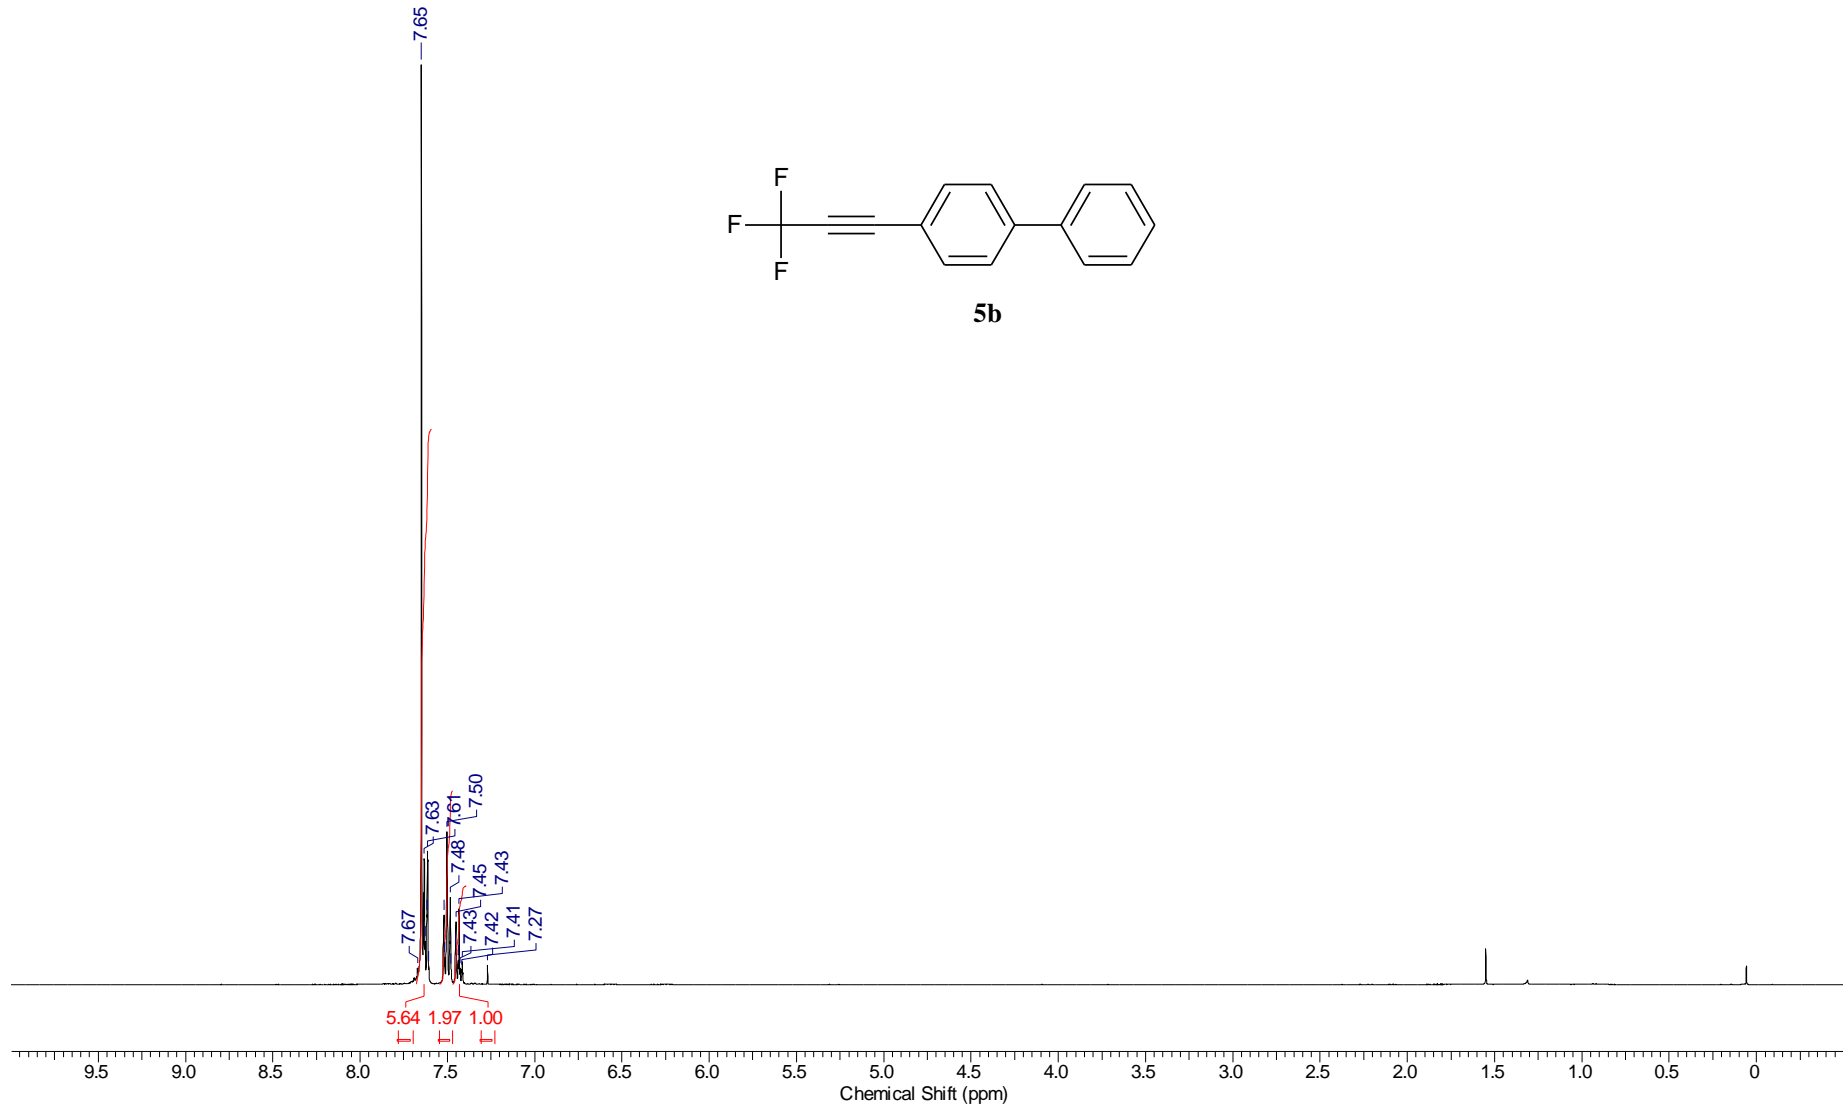

|                       |              |                      |                |                      |          |                        |                     |
|-----------------------|--------------|----------------------|----------------|----------------------|----------|------------------------|---------------------|
| Frequency (MHz)       | 100.69       | Nucleus              | 13C            | Number of Transients | 1024     | Origin                 | Bruker BioSpin GmbH |
| Original Points Count | 32768        | Owner                | tibbe_operator | Points Count         | 32768    | SW(cyclical) (Hz)      | 24037.73            |
| Solvent               | CHLOROFORM-d | Spectrum Offset (Hz) | 10064.3086     | Sweep Width (Hz)     | 24036.99 | Temperature (degree C) | 27.000              |

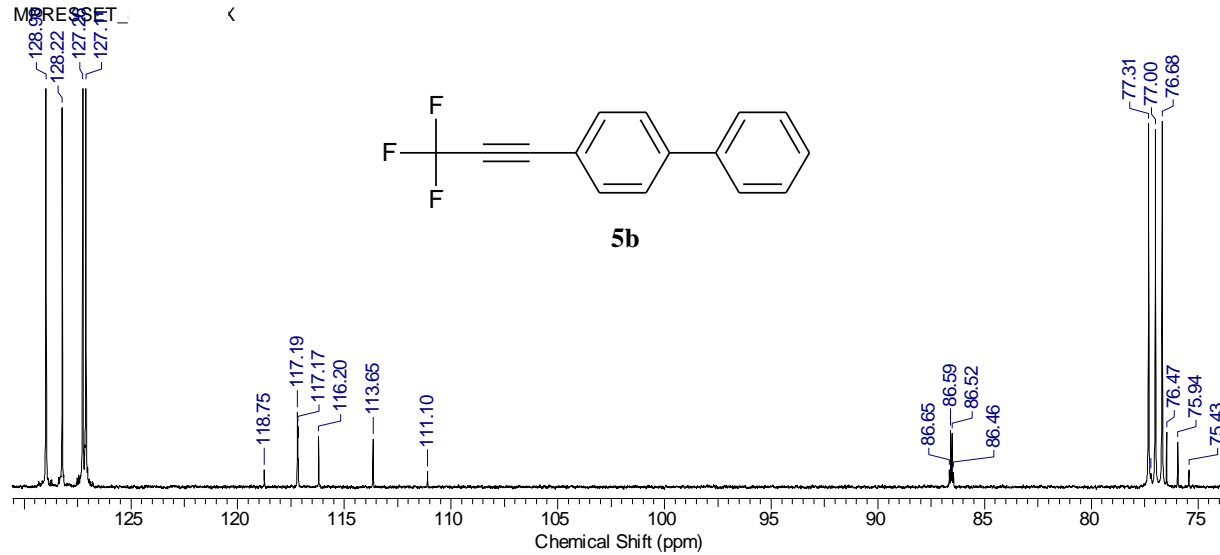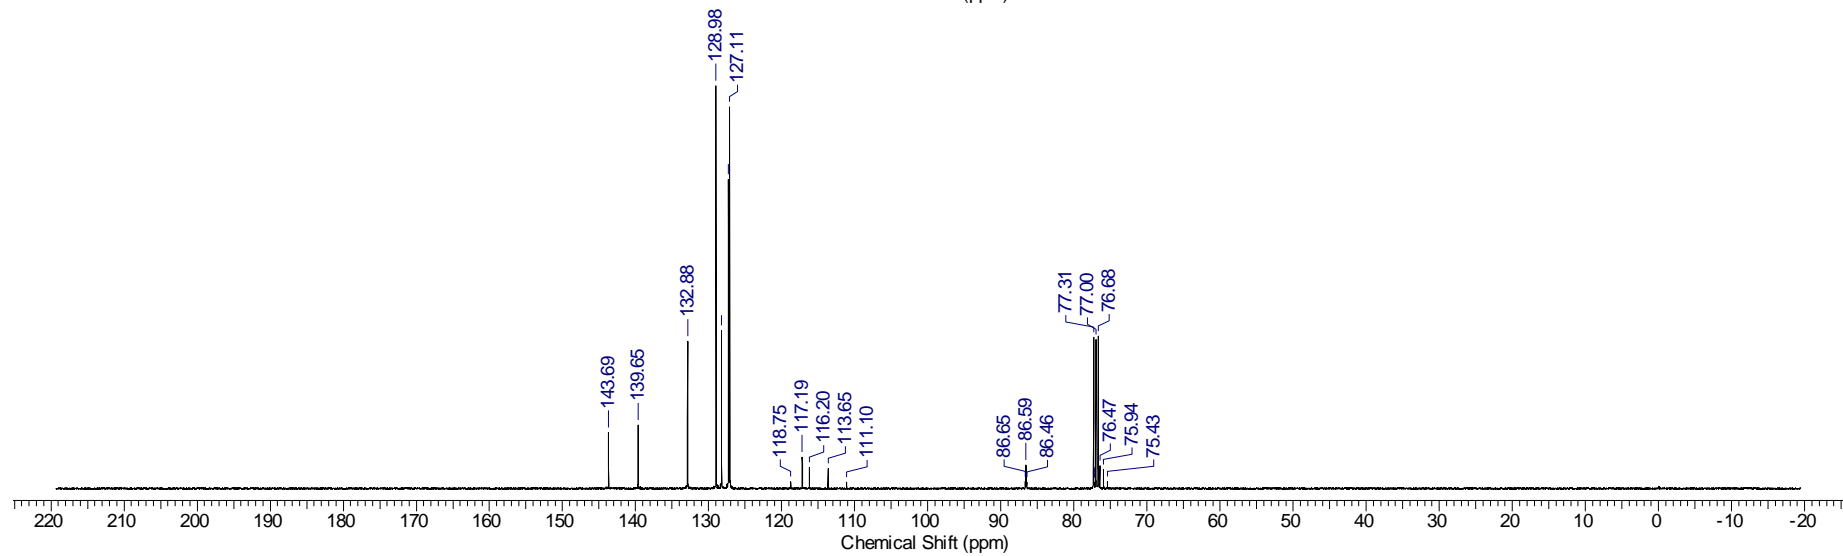

|                              |              |                             |                |                             |          |                               |                     |
|------------------------------|--------------|-----------------------------|----------------|-----------------------------|----------|-------------------------------|---------------------|
| <b>Frequency (MHz)</b>       | 100.69       | <b>Nucleus</b>              | 13C Dent135    | <b>Number of Transients</b> | 256      | <b>Origin</b>                 | Bruker BioSpin GmbH |
| <b>Original Points Count</b> | 32768        | <b>Owner</b>                | tibbe_operator | <b>Points Count</b>         | 32768    | <b>SW(cyclical) (Hz)</b>      | 24037.73            |
| <b>Solvent</b>               | CHLOROFORM-d | <b>Spectrum Offset (Hz)</b> | 10064.4014     | <b>Sweep Width (Hz)</b>     | 24036.99 | <b>Temperature (degree C)</b> | 27.000              |

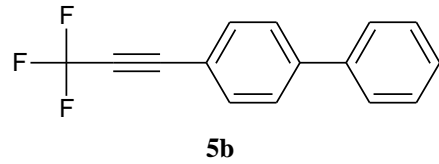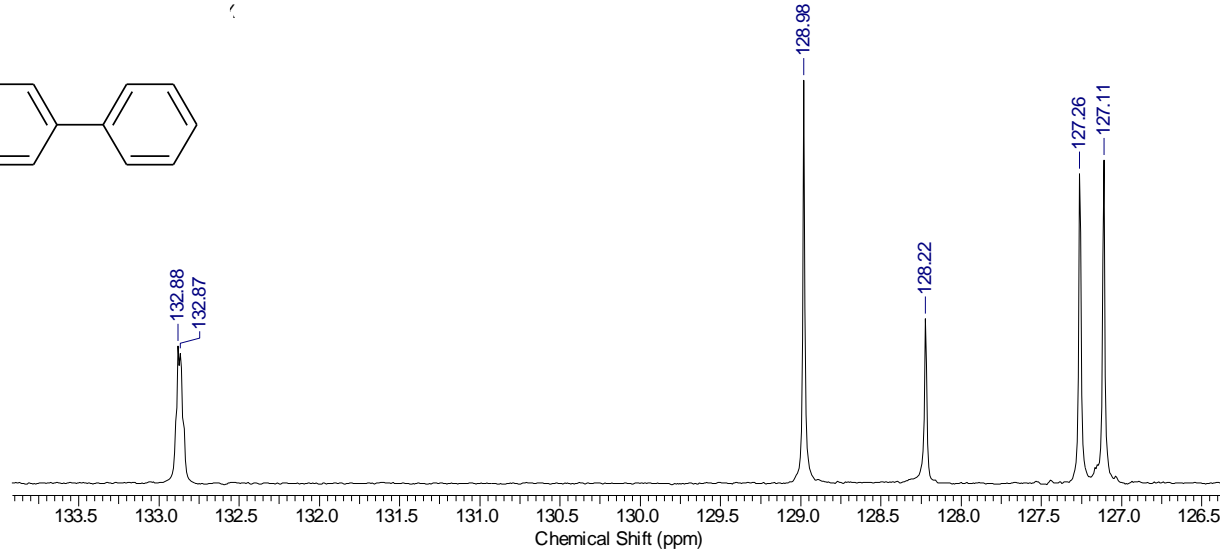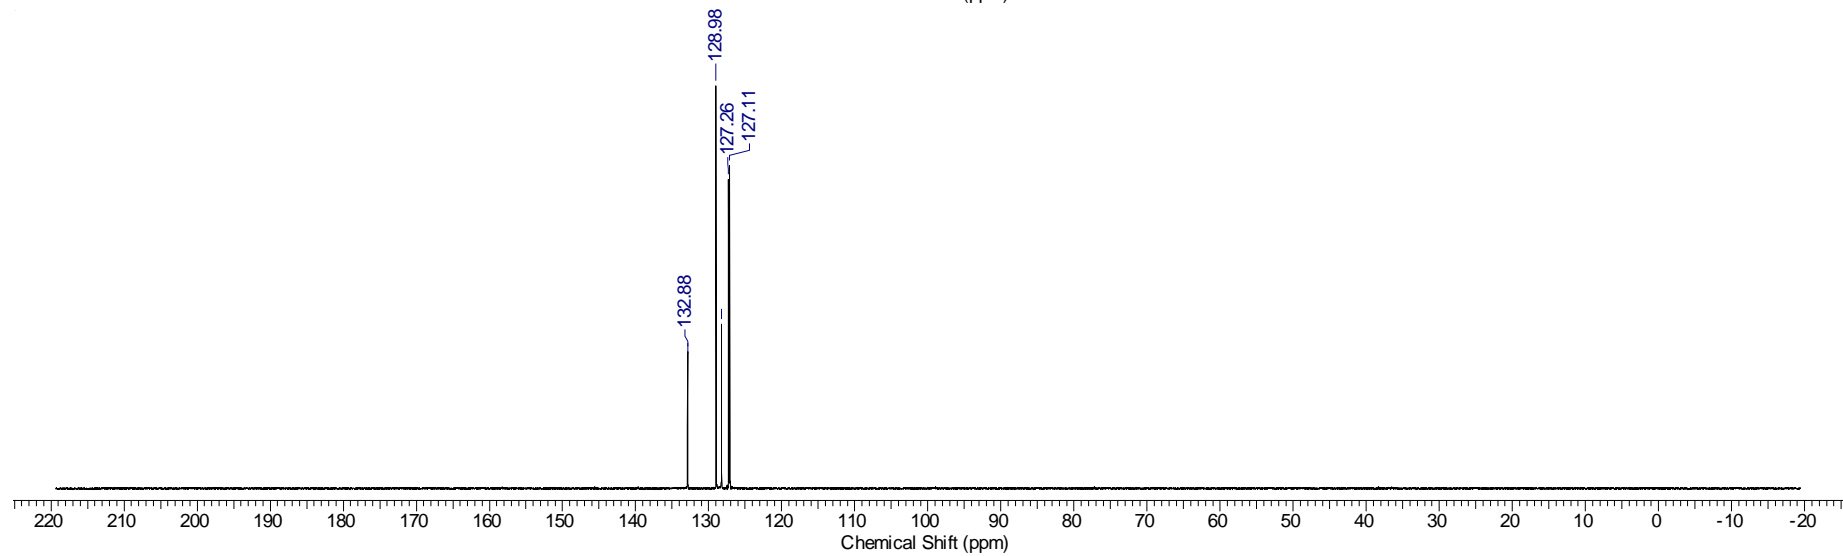

|                              |              |                             |                |                             |          |                               |                     |
|------------------------------|--------------|-----------------------------|----------------|-----------------------------|----------|-------------------------------|---------------------|
| <b>Frequency (MHz)</b>       | 376.71       | <b>Nucleus</b>              | 19F            | <b>Number of Transients</b> | 64       | <b>Origin</b>                 | Bruker BioSpin GmbH |
| <b>Original Points Count</b> | 131072       | <b>Owner</b>                | tibbe_operator | <b>Points Count</b>         | 131072   | <b>SW(cyclical) (Hz)</b>      | 93749.28            |
| <b>Solvent</b>               | CHLOROFORM-d | <b>Spectrum Offset (Hz)</b> | -37752.5078    | <b>Sweep Width (Hz)</b>     | 93748.56 | <b>Temperature (degree C)</b> | 27.000              |

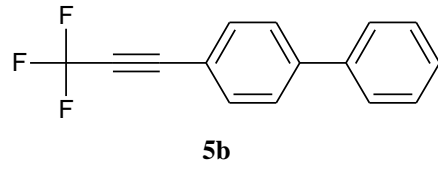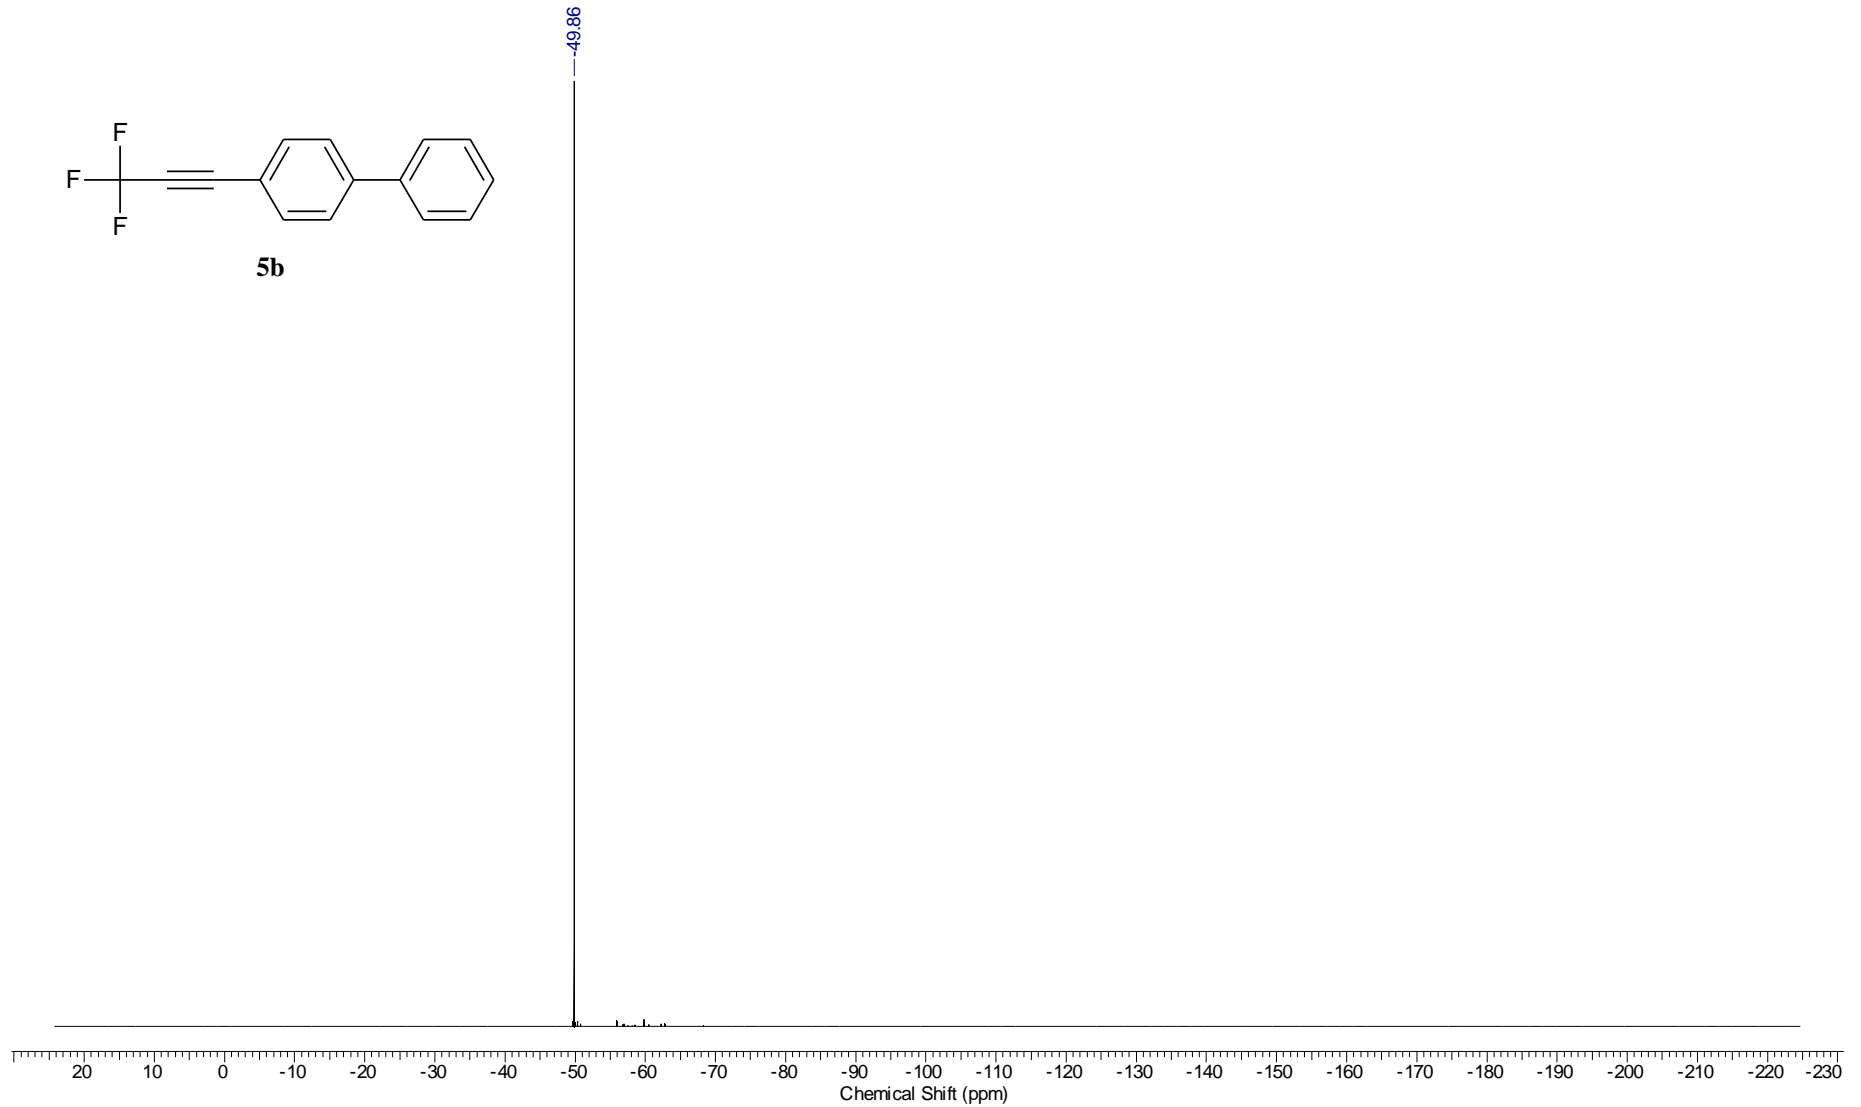

|                       |              |                      |                 |                      |          |                        |                     |
|-----------------------|--------------|----------------------|-----------------|----------------------|----------|------------------------|---------------------|
| Frequency (MHz)       | 376.71       | Nucleus              | <sup>19</sup> F | Number of Transients | 64       | Origin                 | Bruker BioSpin GmbH |
| Original Points Count | 131072       | Owner                | tibbe_operator  | Points Count         | 131072   | SW(cyclical) (Hz)      | 93749.28            |
| Solvent               | CHLOROFORM-d | Spectrum Offset (Hz) | -37465.4805     | Sweep Width (Hz)     | 93748.56 | Temperature (degree C) | 27.000              |

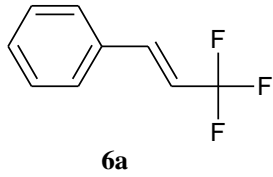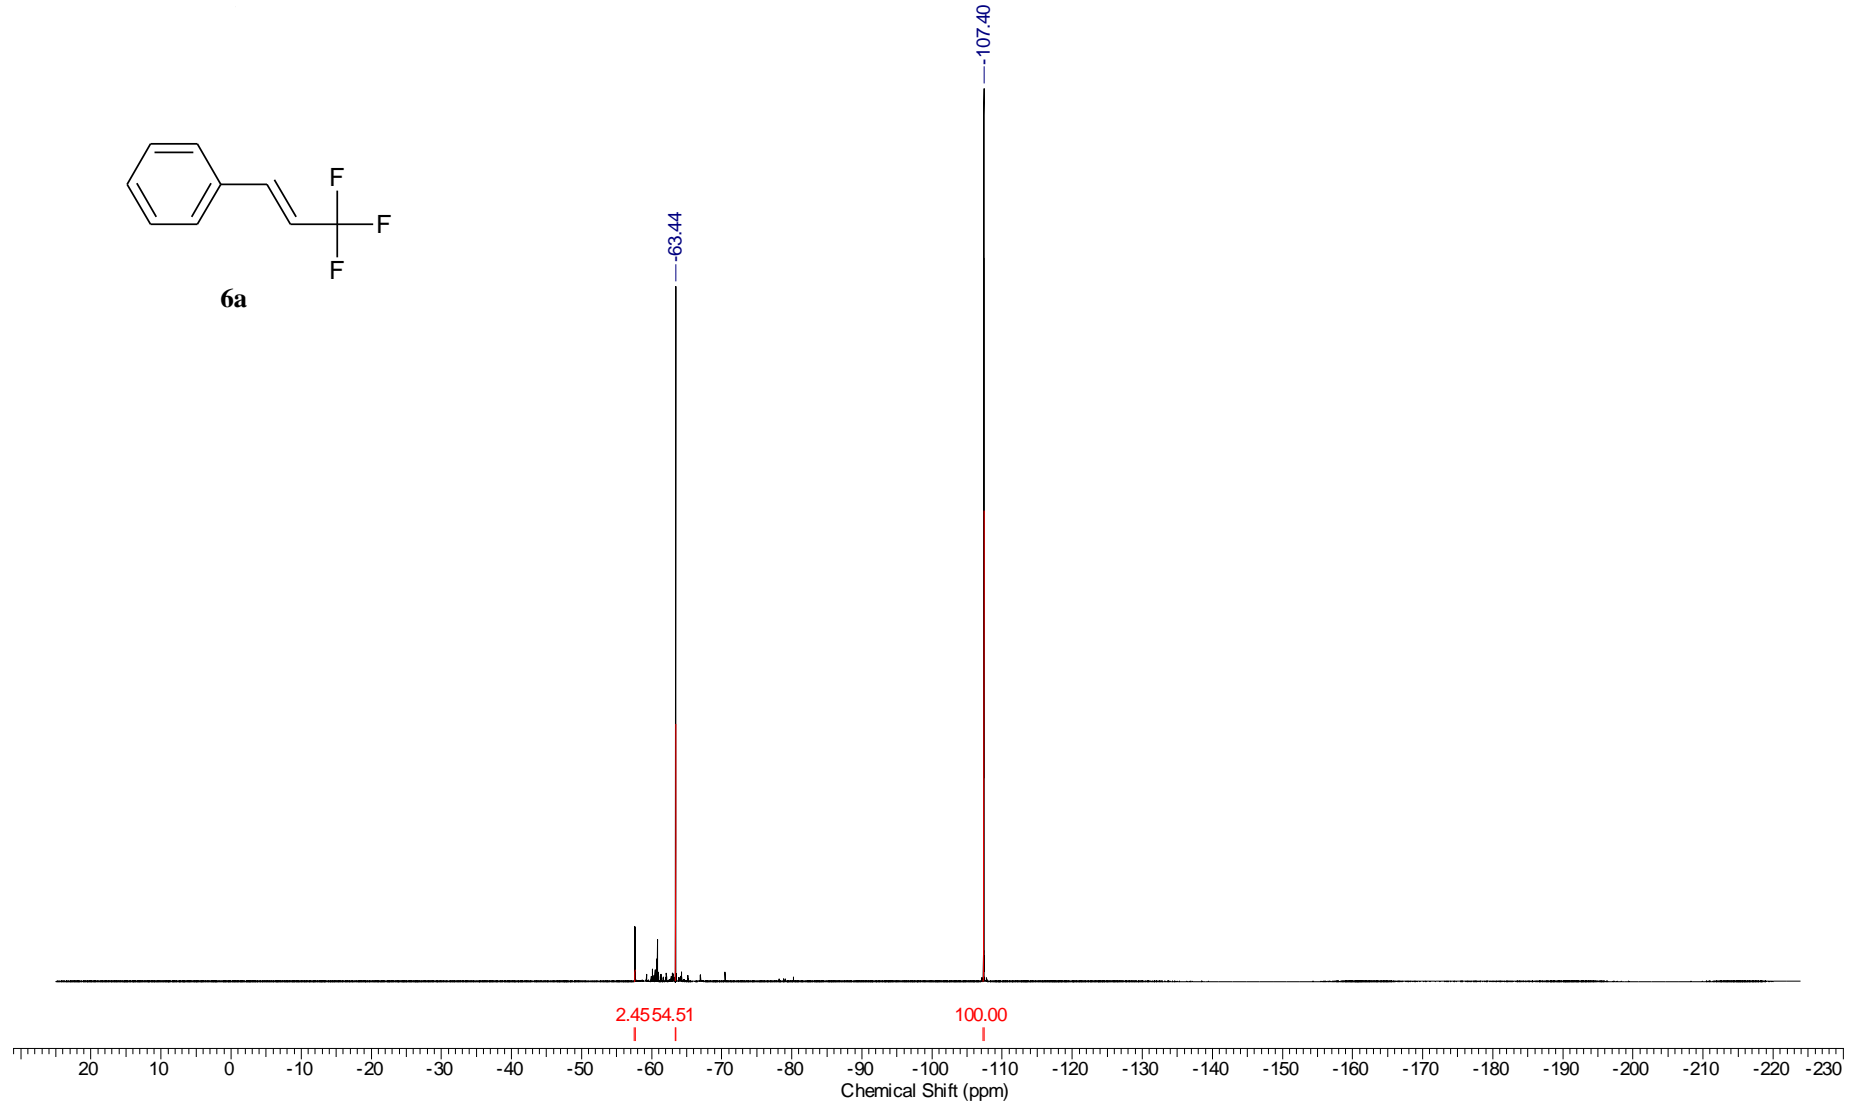

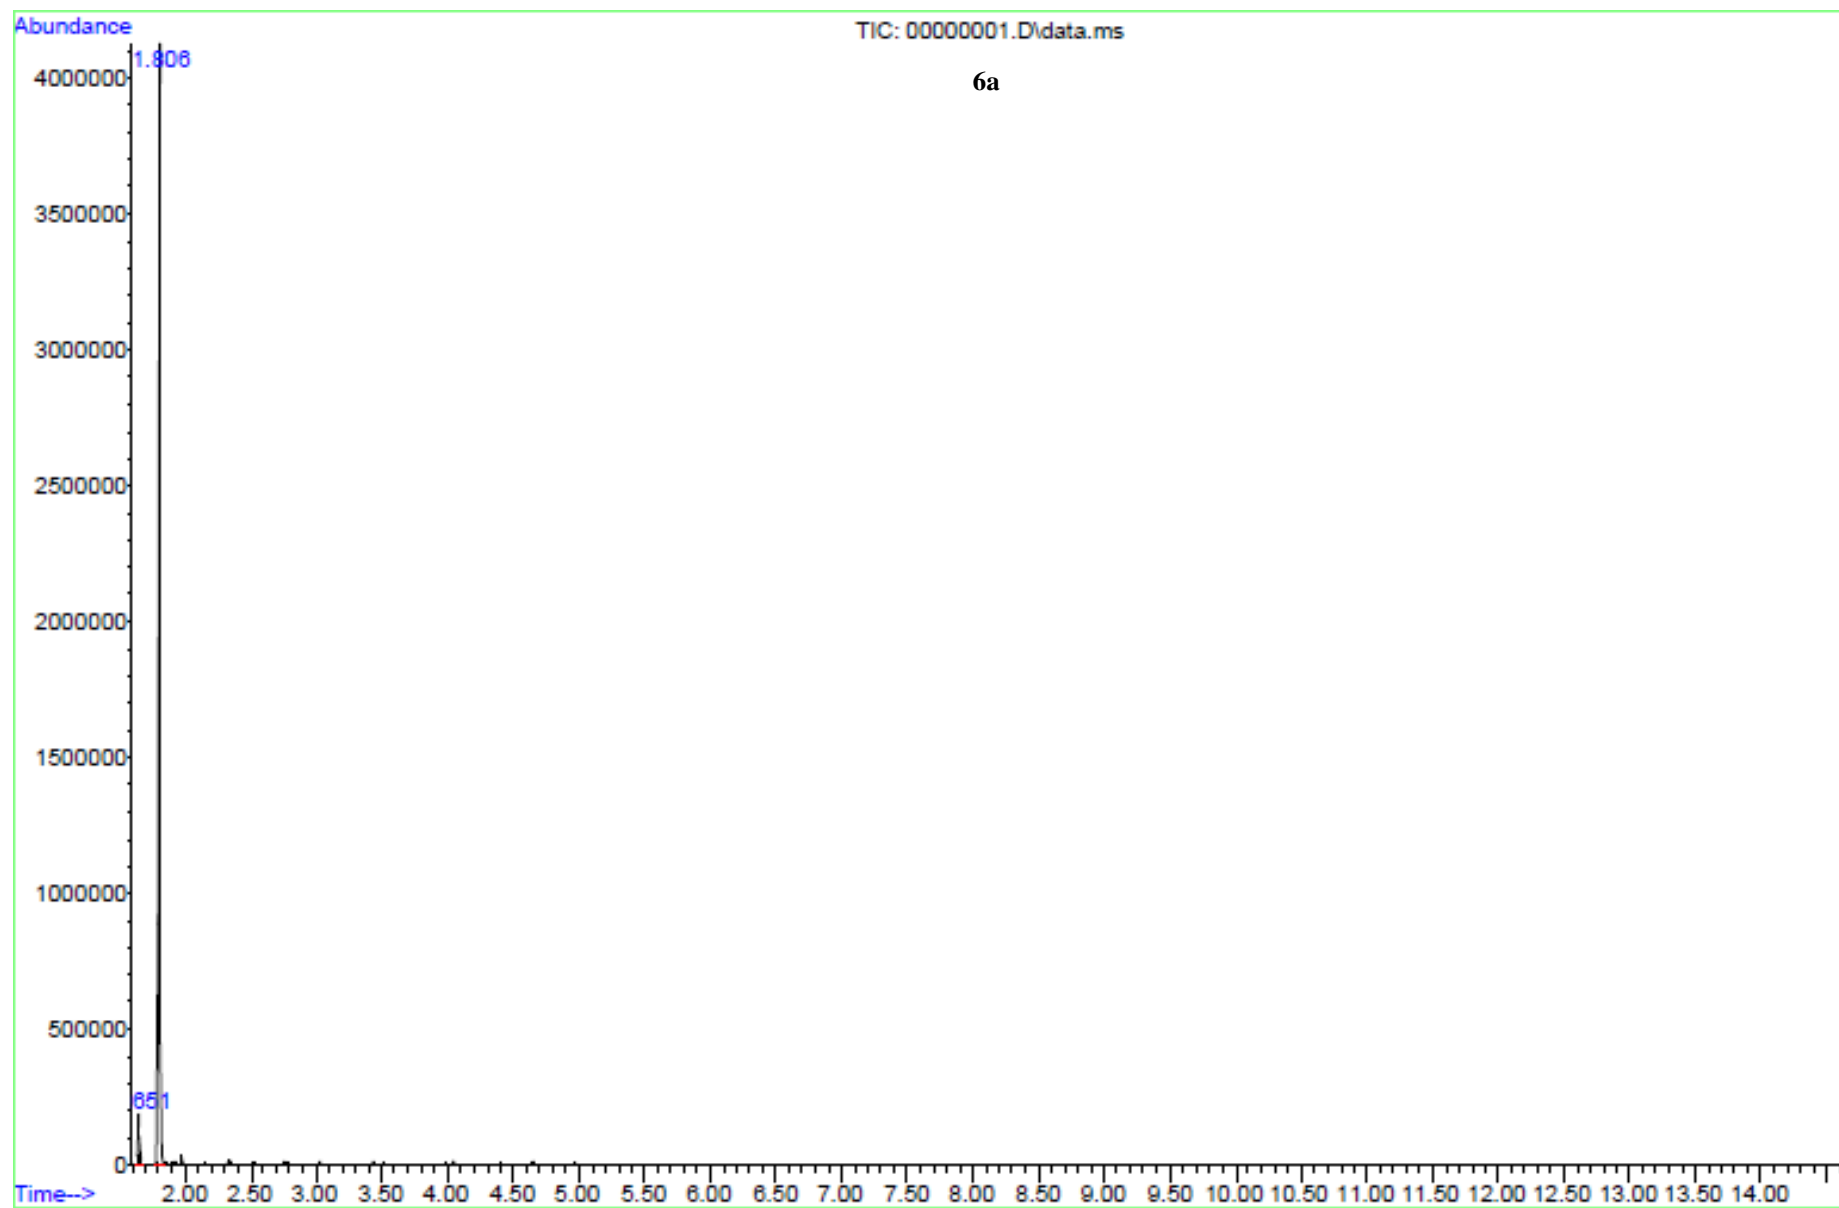

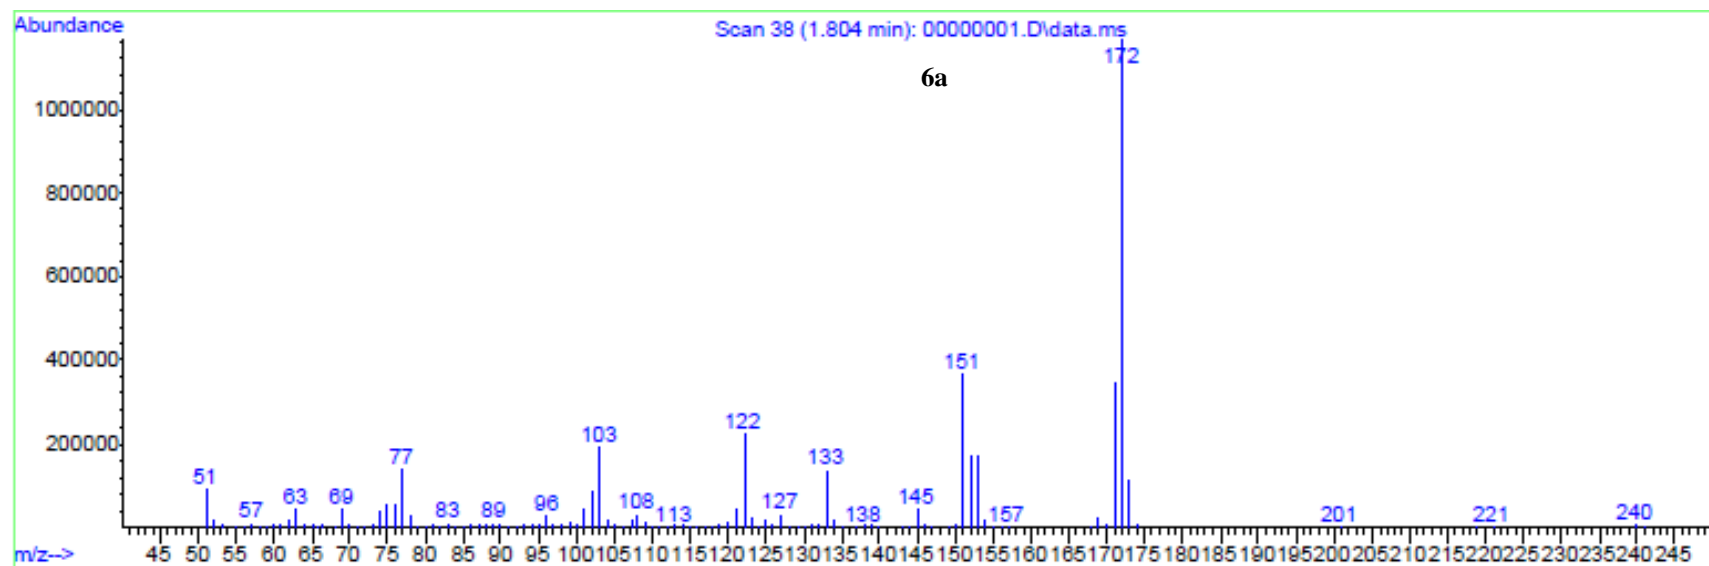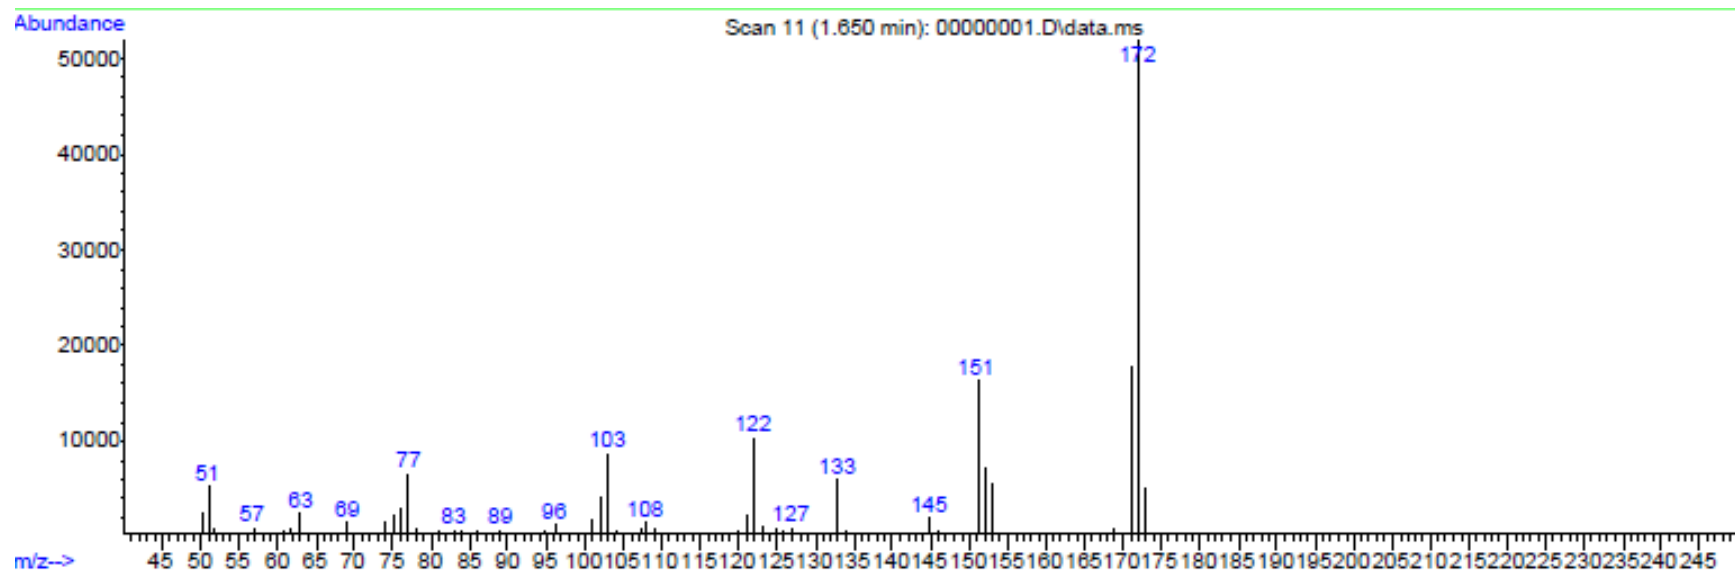

|                              |          |                          |                |                               |              |                             |             |
|------------------------------|----------|--------------------------|----------------|-------------------------------|--------------|-----------------------------|-------------|
| <b>Frequency (MHz)</b>       | 376.75   | <b>Nucleus</b>           | 19F            | <b>Number of Transients</b>   | 64           | <b>Origin</b>               | spect       |
| <b>Original Points Count</b> | 131072   | <b>Owner</b>             | tibbe operator | <b>Points Count</b>           | 131072       | <b>Pulse Sequence</b>       | zpg30       |
| <b>Receiver Gain</b>         | 1620.00  | <b>SW(cyclical) (Hz)</b> | 89285.71       | <b>Solvent</b>                | CHLOROFORM-d | <b>Spectrum Offset (Hz)</b> | -37674.2031 |
| <b>Spectrum Type</b>         | STANDARD | <b>Sweep Width (Hz)</b>  | 89285.03       | <b>Temperature (degree C)</b> | 27.000       |                             |             |

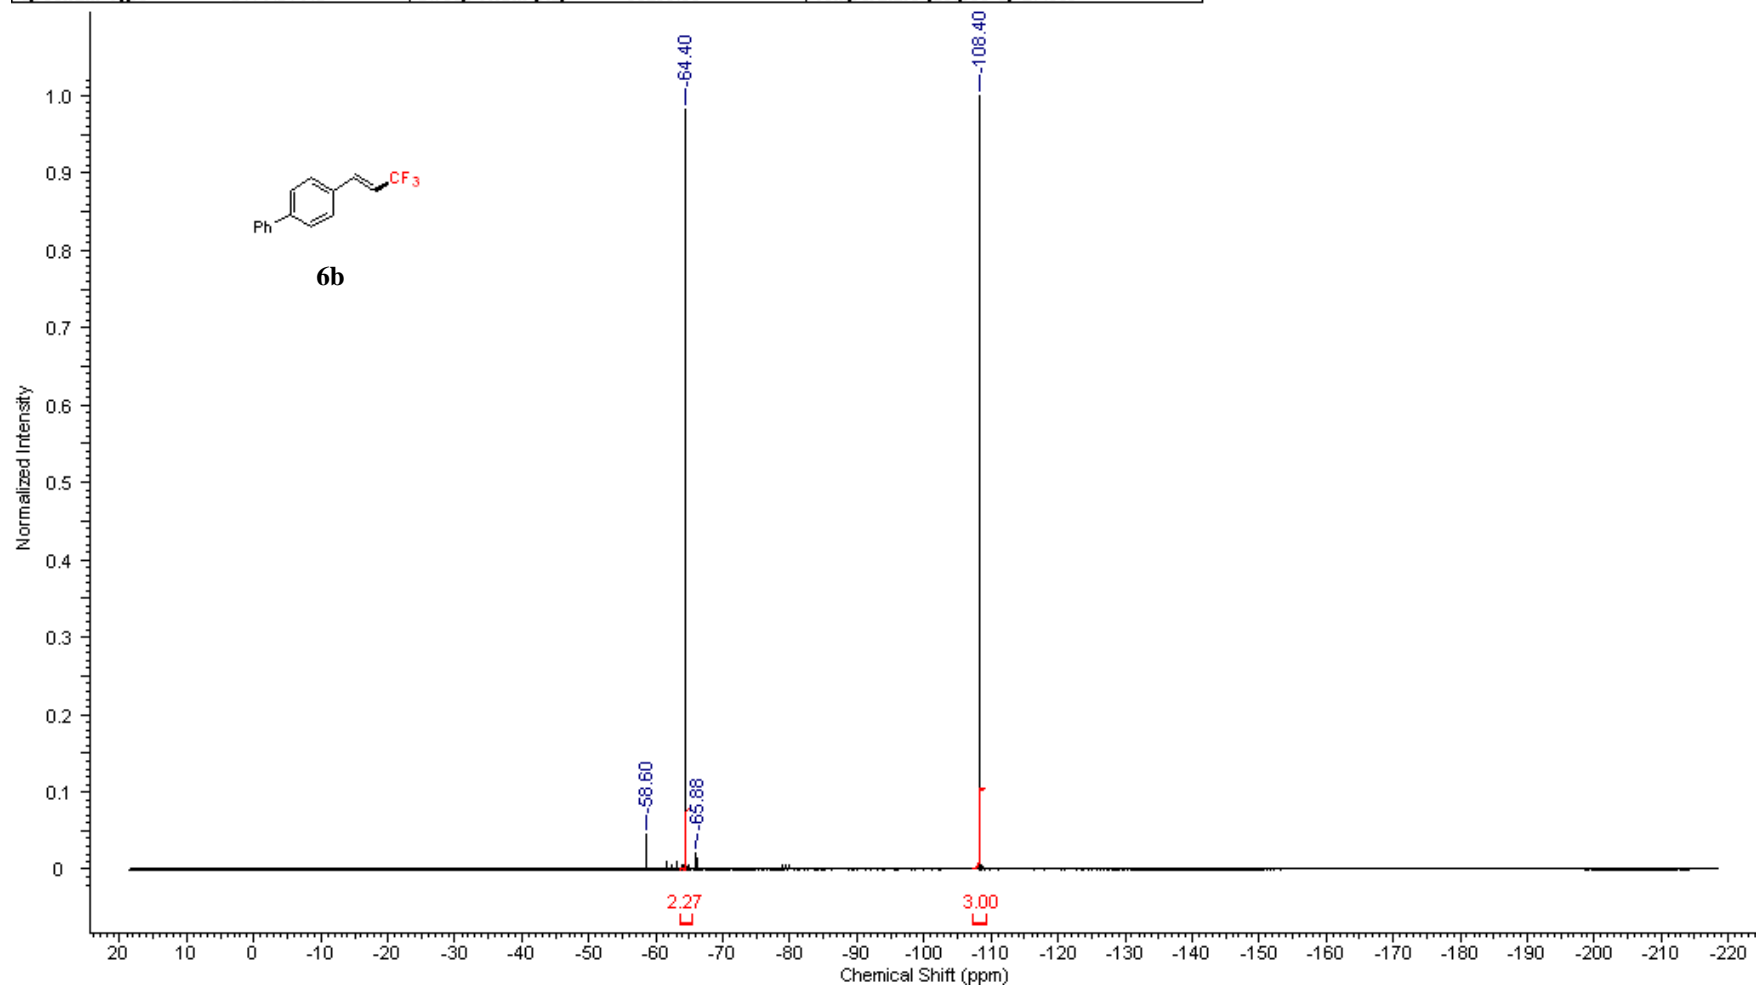



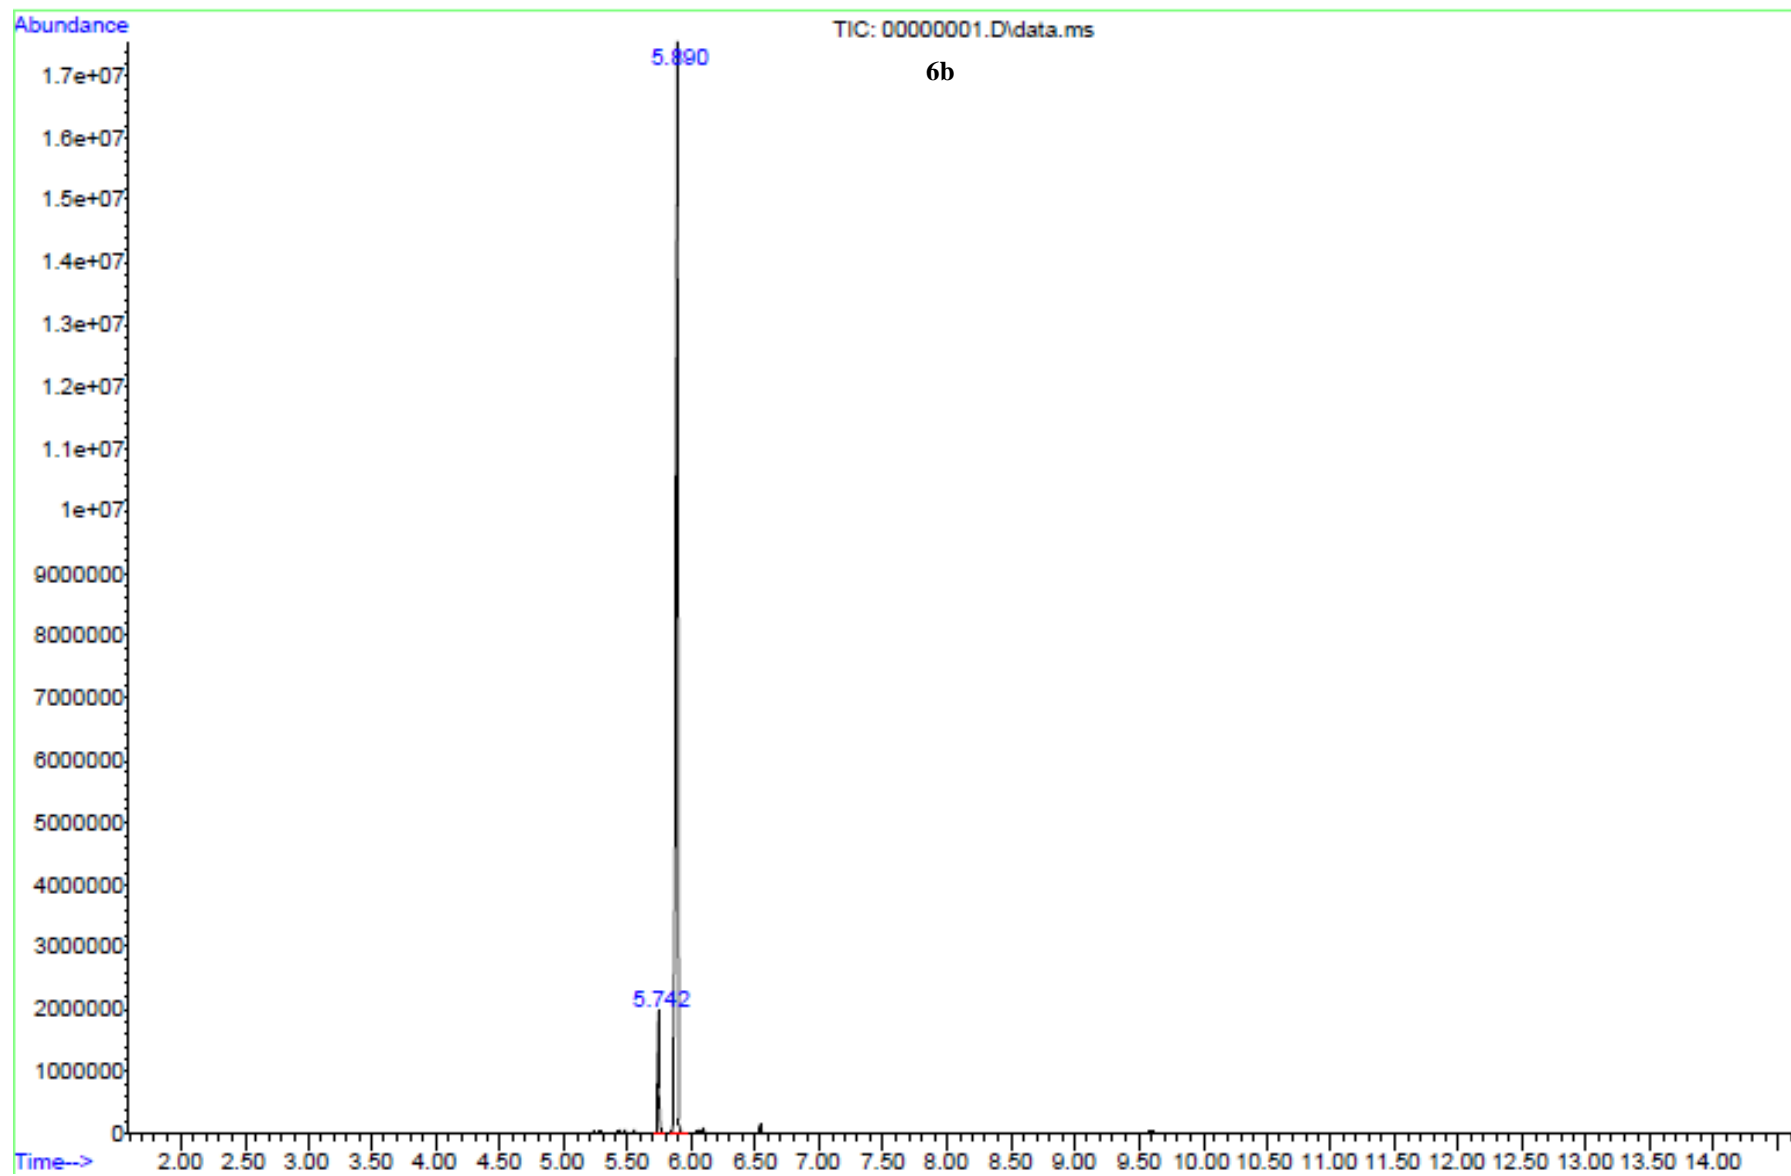

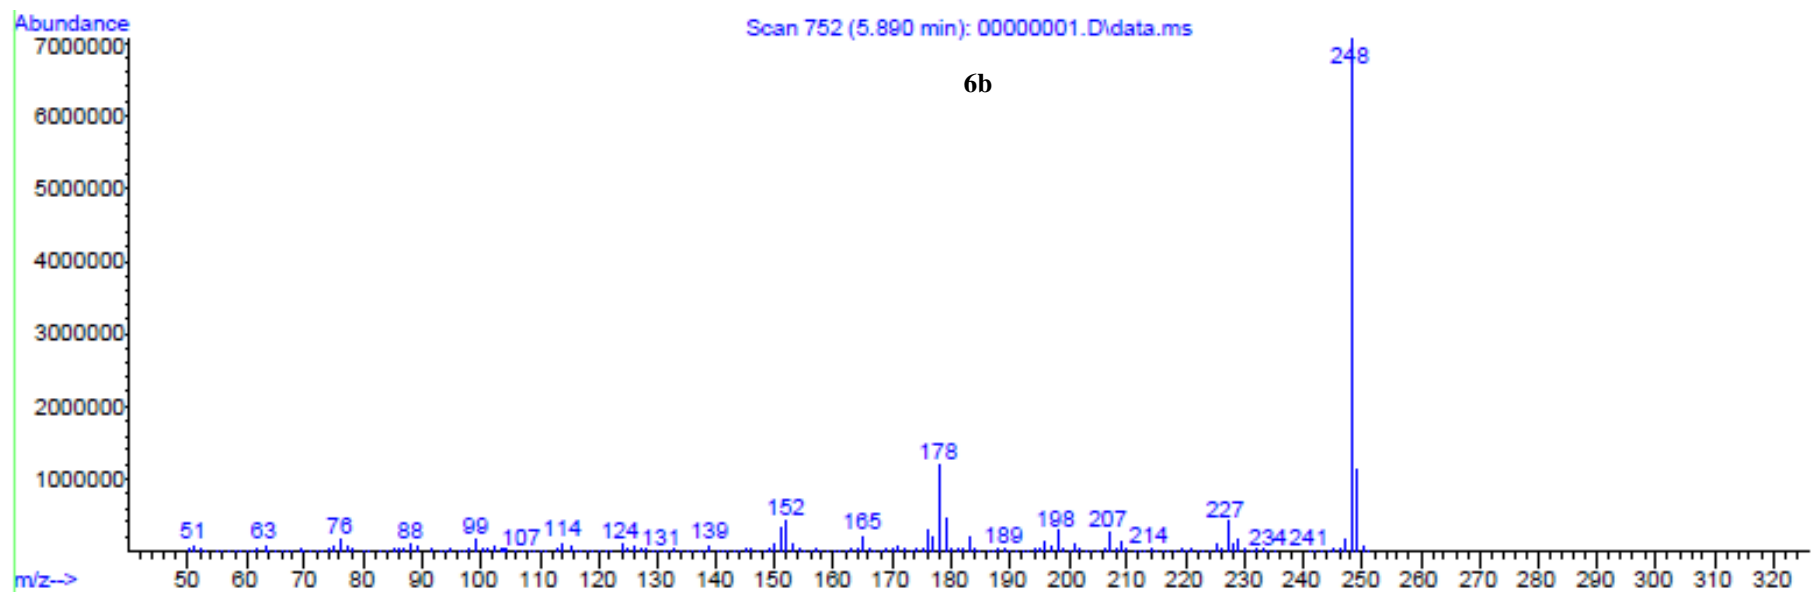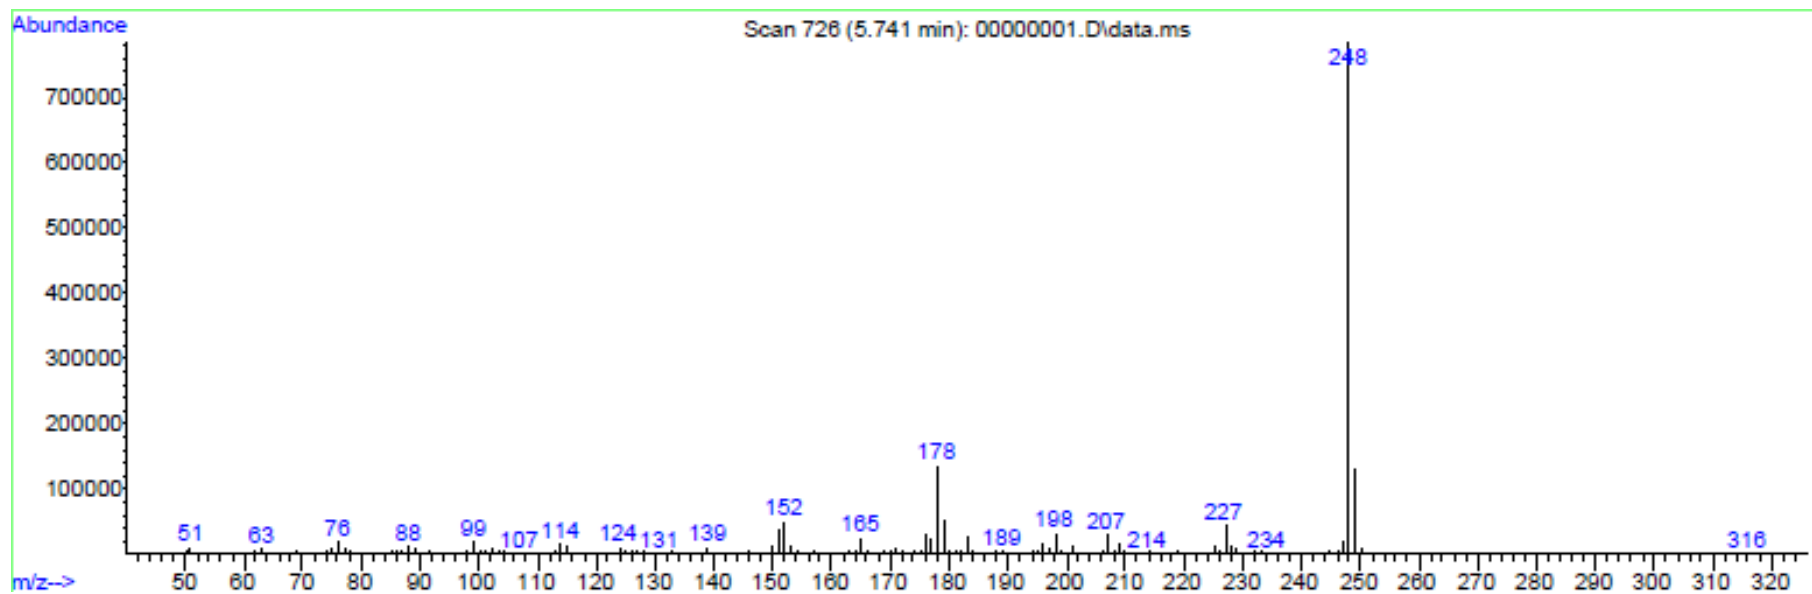

|                       |              |                      |                |                      |         |                        |                     |
|-----------------------|--------------|----------------------|----------------|----------------------|---------|------------------------|---------------------|
| Frequency (MHz)       | 400.40       | Nucleus              | 1H             | Number of Transients | 16      | Origin                 | Bruker BioSpin GmbH |
| Original Points Count | 32768        | Owner                | tibbe_operator | Points Count         | 32768   | SW(cyclical) (Hz)      | 7211.32             |
| Solvent               | CHLOROFORM-d | Spectrum Offset (Hz) | 3358.7139      | Sweep Width (Hz)     | 7211.10 | Temperature (degree C) | 27.000              |

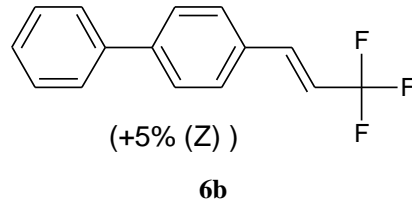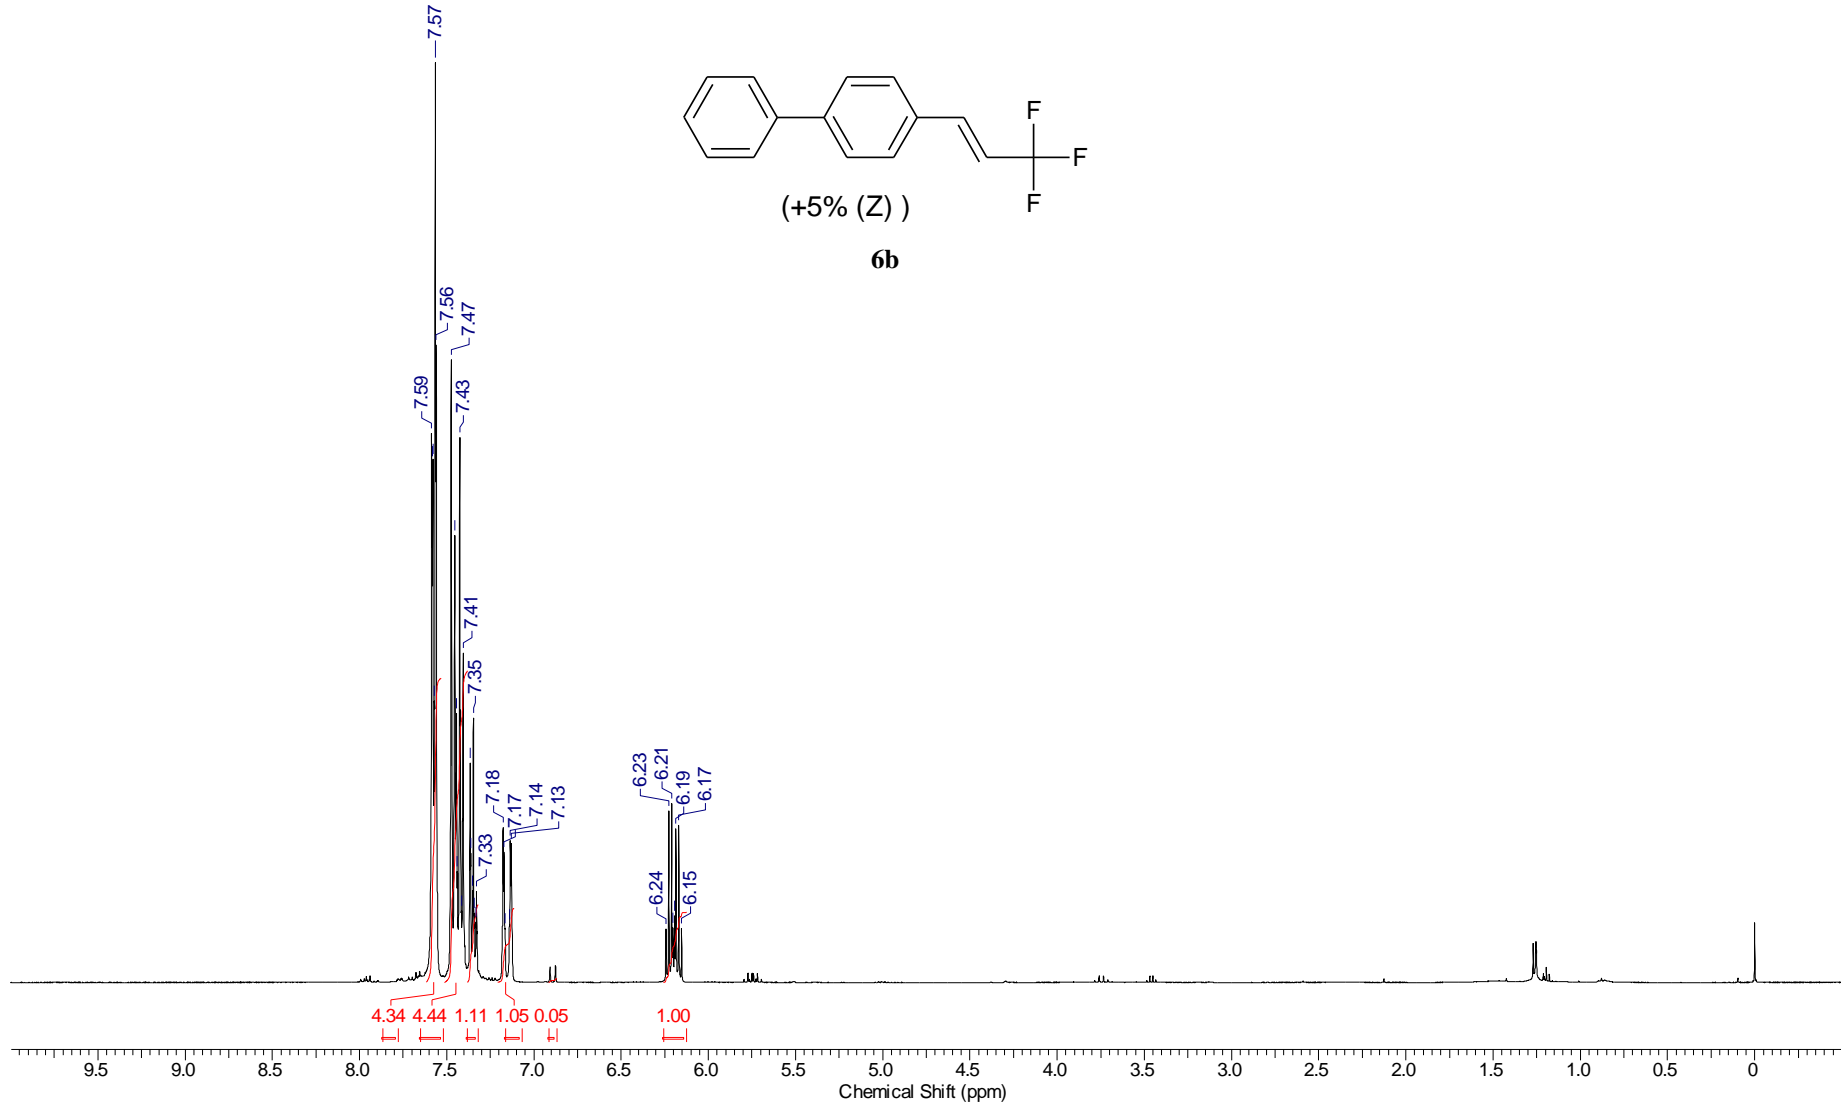

|                       |              |                      |                 |                      |          |                        |                     |
|-----------------------|--------------|----------------------|-----------------|----------------------|----------|------------------------|---------------------|
| Frequency (MHz)       | 100.69       | Nucleus              | <sup>13</sup> C | Number of Transients | 1024     | Origin                 | Bruker BioSpin GmbH |
| Original Points Count | 32768        | Owner                | tibbe_operator  | Points Count         | 32768    | SW(cyclical) (Hz)      | 24037.73            |
| Solvent               | CHLOROFORM-d | Spectrum Offset (Hz) | 10060.6406      | Sweep Width (Hz)     | 24036.99 | Temperature (degree C) | 27.000              |

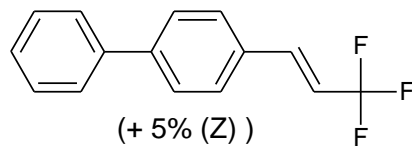

6b

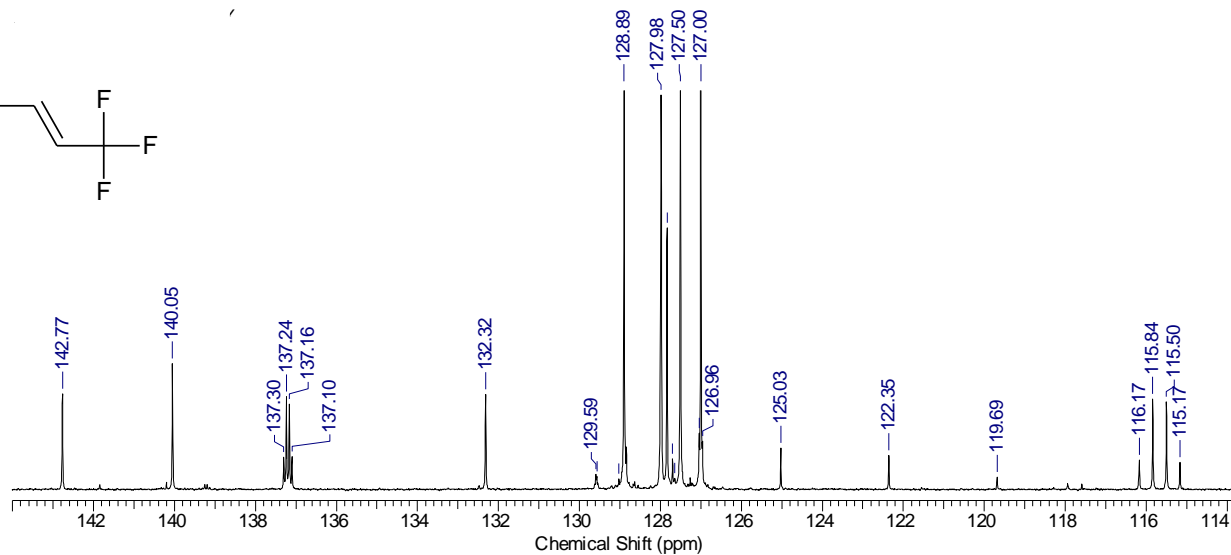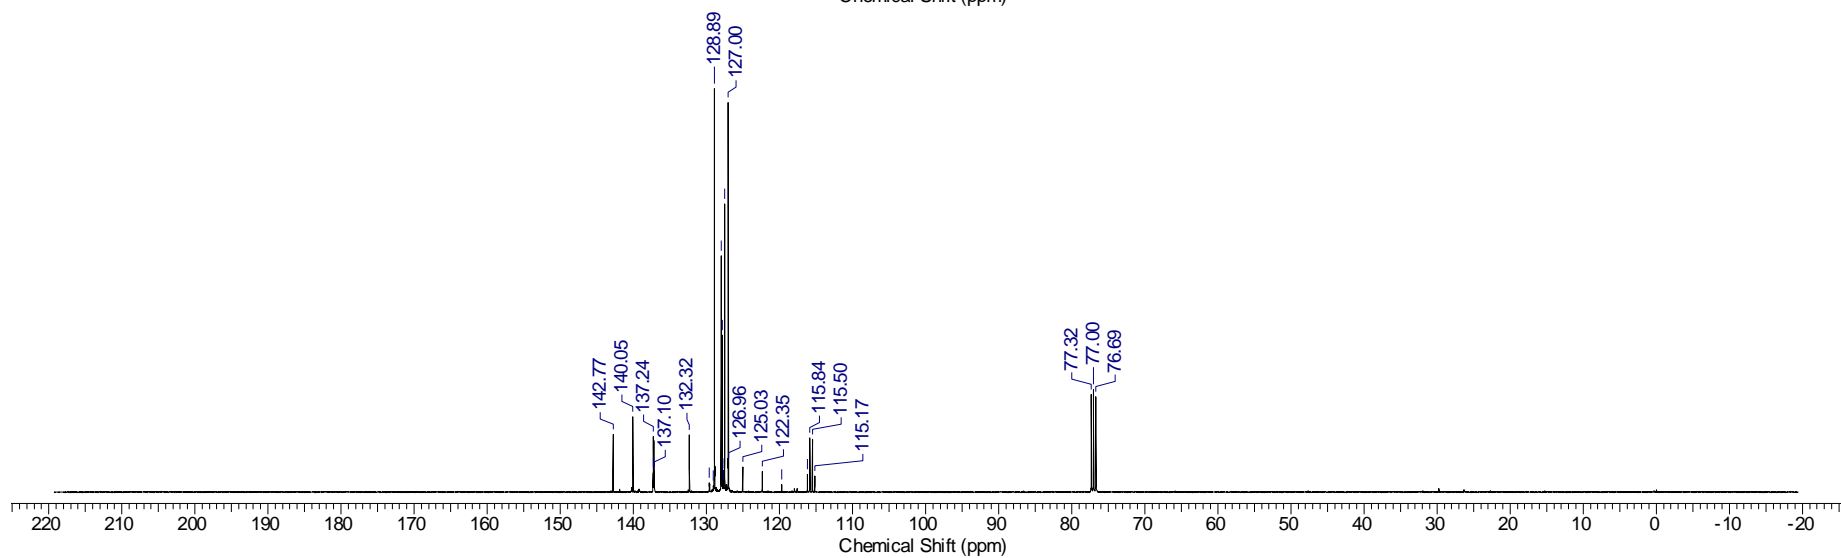

|                       |              |                      |                |          |                      |          |                        |                     |
|-----------------------|--------------|----------------------|----------------|----------|----------------------|----------|------------------------|---------------------|
| Frequency (MHz)       | 100.69       | Nucleus              | 13C            | Dept 135 | Number of Transients | 256      | Origin                 | Bruker BioSpin GmbH |
| Original Points Count | 32768        | Owner                | tibbe_operator |          | Points Count         | 32768    | SW(cyclical) (Hz)      | 24037.73            |
| Solvent               | CHLOROFORM-d | Spectrum Offset (Hz) | 10060.2402     |          | Sweep Width (Hz)     | 24036.99 | Temperature (degree C) | 27.000              |

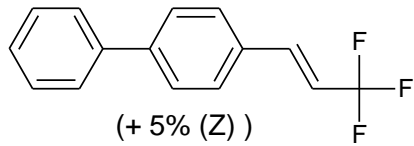

6b

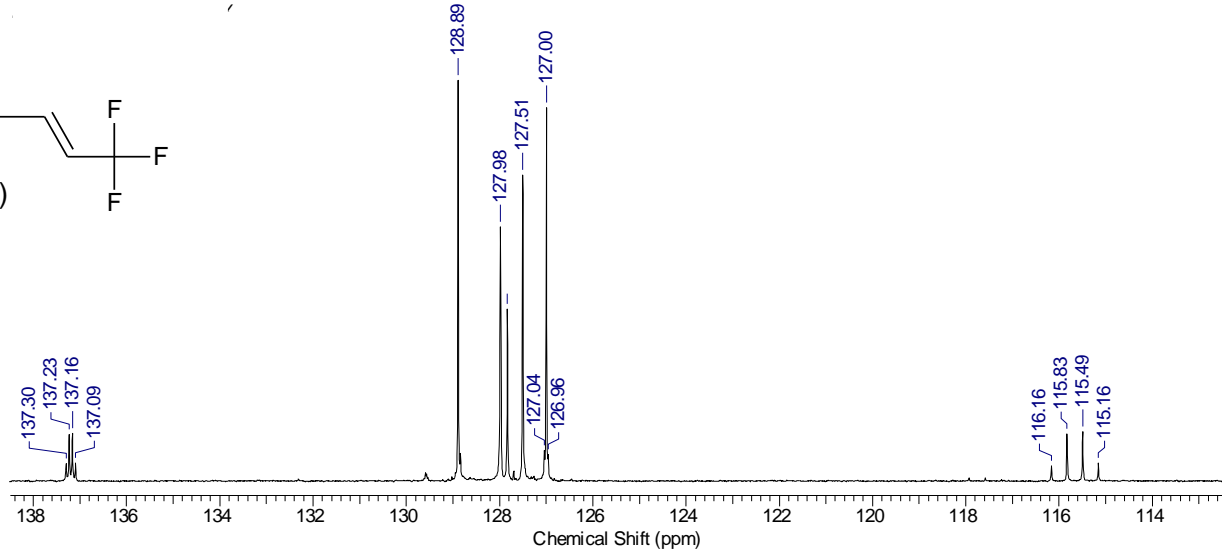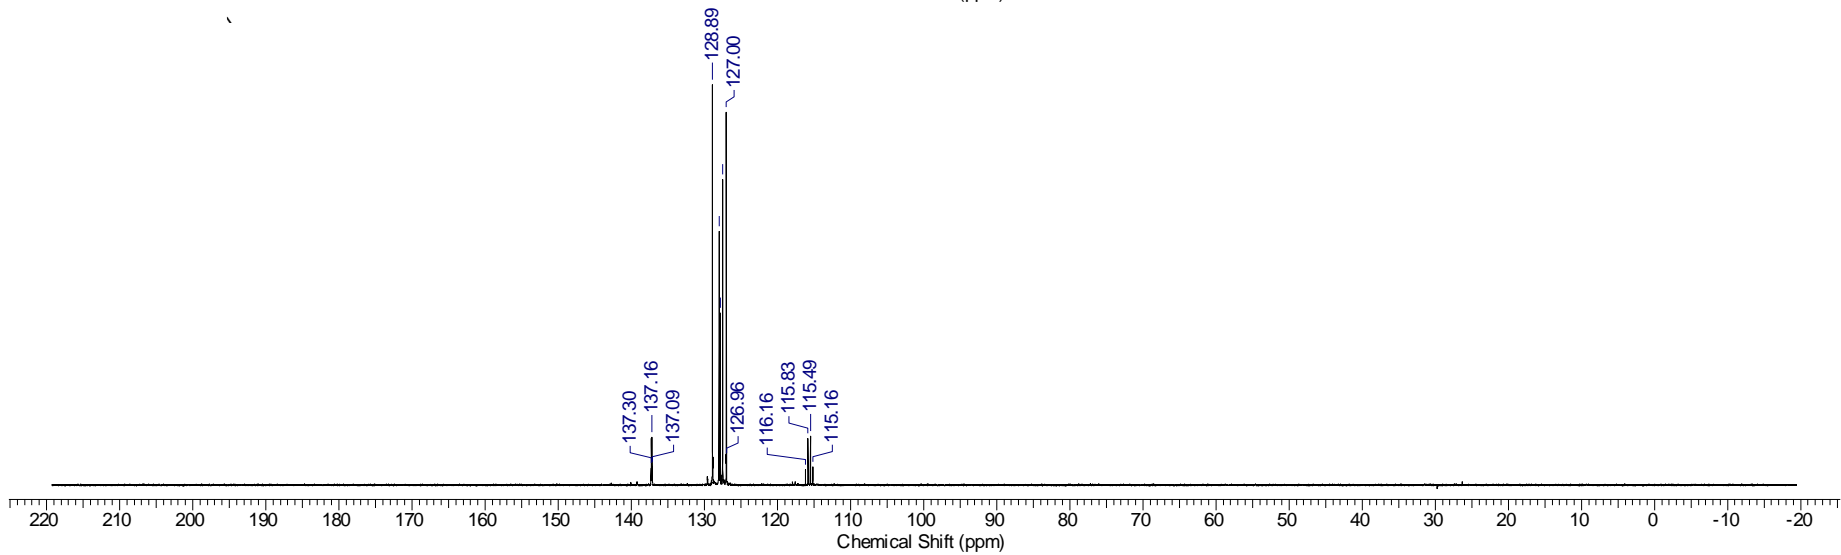

|                       |              |                      |                |                      |          |                        |                     |
|-----------------------|--------------|----------------------|----------------|----------------------|----------|------------------------|---------------------|
| Frequency (MHz)       | 376.71       | Nucleus              | 19F            | Number of Transients | 64       | Origin                 | Bruker BioSpin GmbH |
| Original Points Count | 131072       | Owner                | tibbe_operator | Points Count         | 131072   | SW(cyclical) (Hz)      | 93749.28            |
| Solvent               | CHLOROFORM-d | Spectrum Offset (Hz) | -37810.0391    | Sweep Width (Hz)     | 93748.56 | Temperature (degree C) | 27.000              |

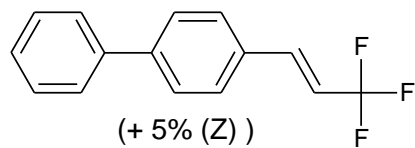

**6b**

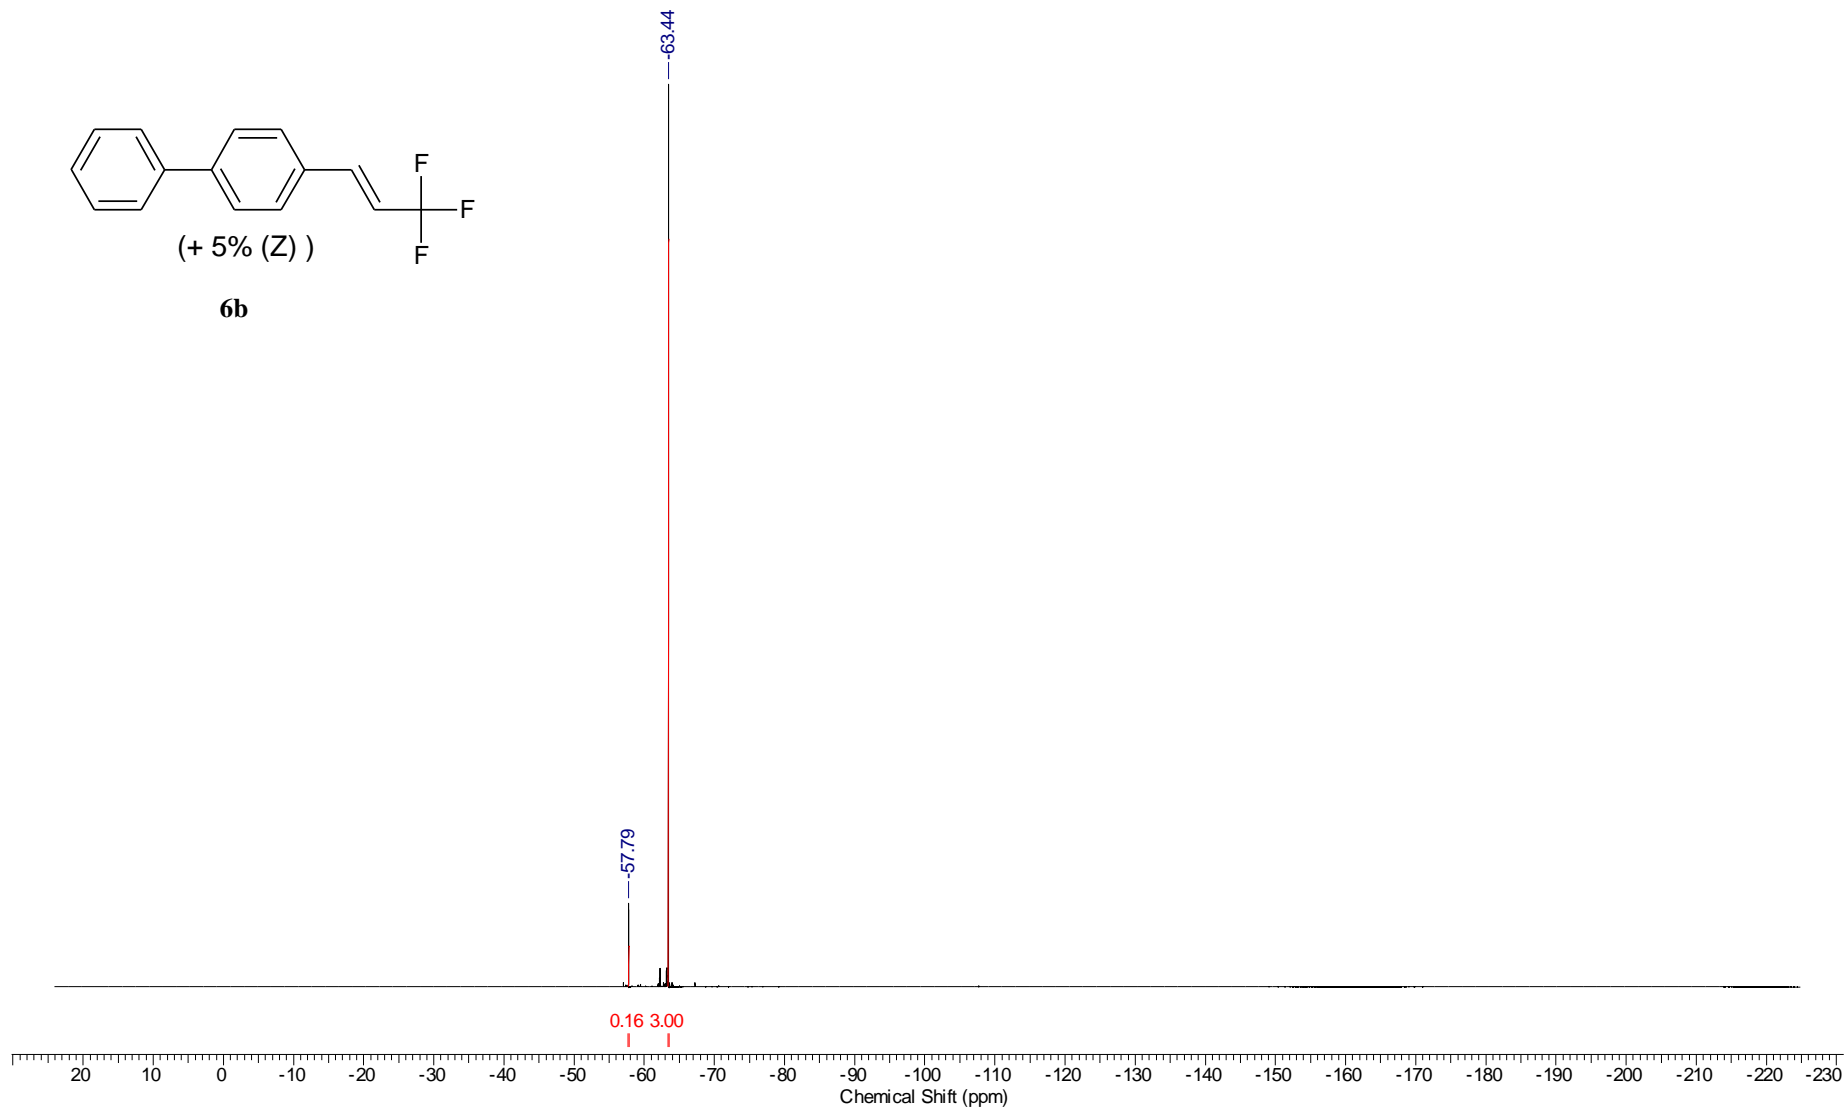

|                       |              |                      |                |                      |          |                        |                     |
|-----------------------|--------------|----------------------|----------------|----------------------|----------|------------------------|---------------------|
| Frequency (MHz)       | 376.71       | Nucleus              | 19F            | Number of Transients | 64       | Origin                 | Bruker BioSpin GmbH |
| Original Points Count | 131072       | Owner                | tibbe_operator | Points Count         | 131072   | SW(cyclical) (Hz)      | 93749.28            |
| Solvent               | CHLOROFORM-d | Spectrum Offset (Hz) | -37420.4180    | Sweep Width (Hz)     | 93748.56 | Temperature (degree C) | 27.000              |

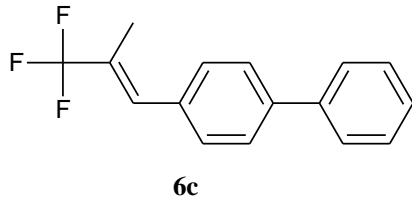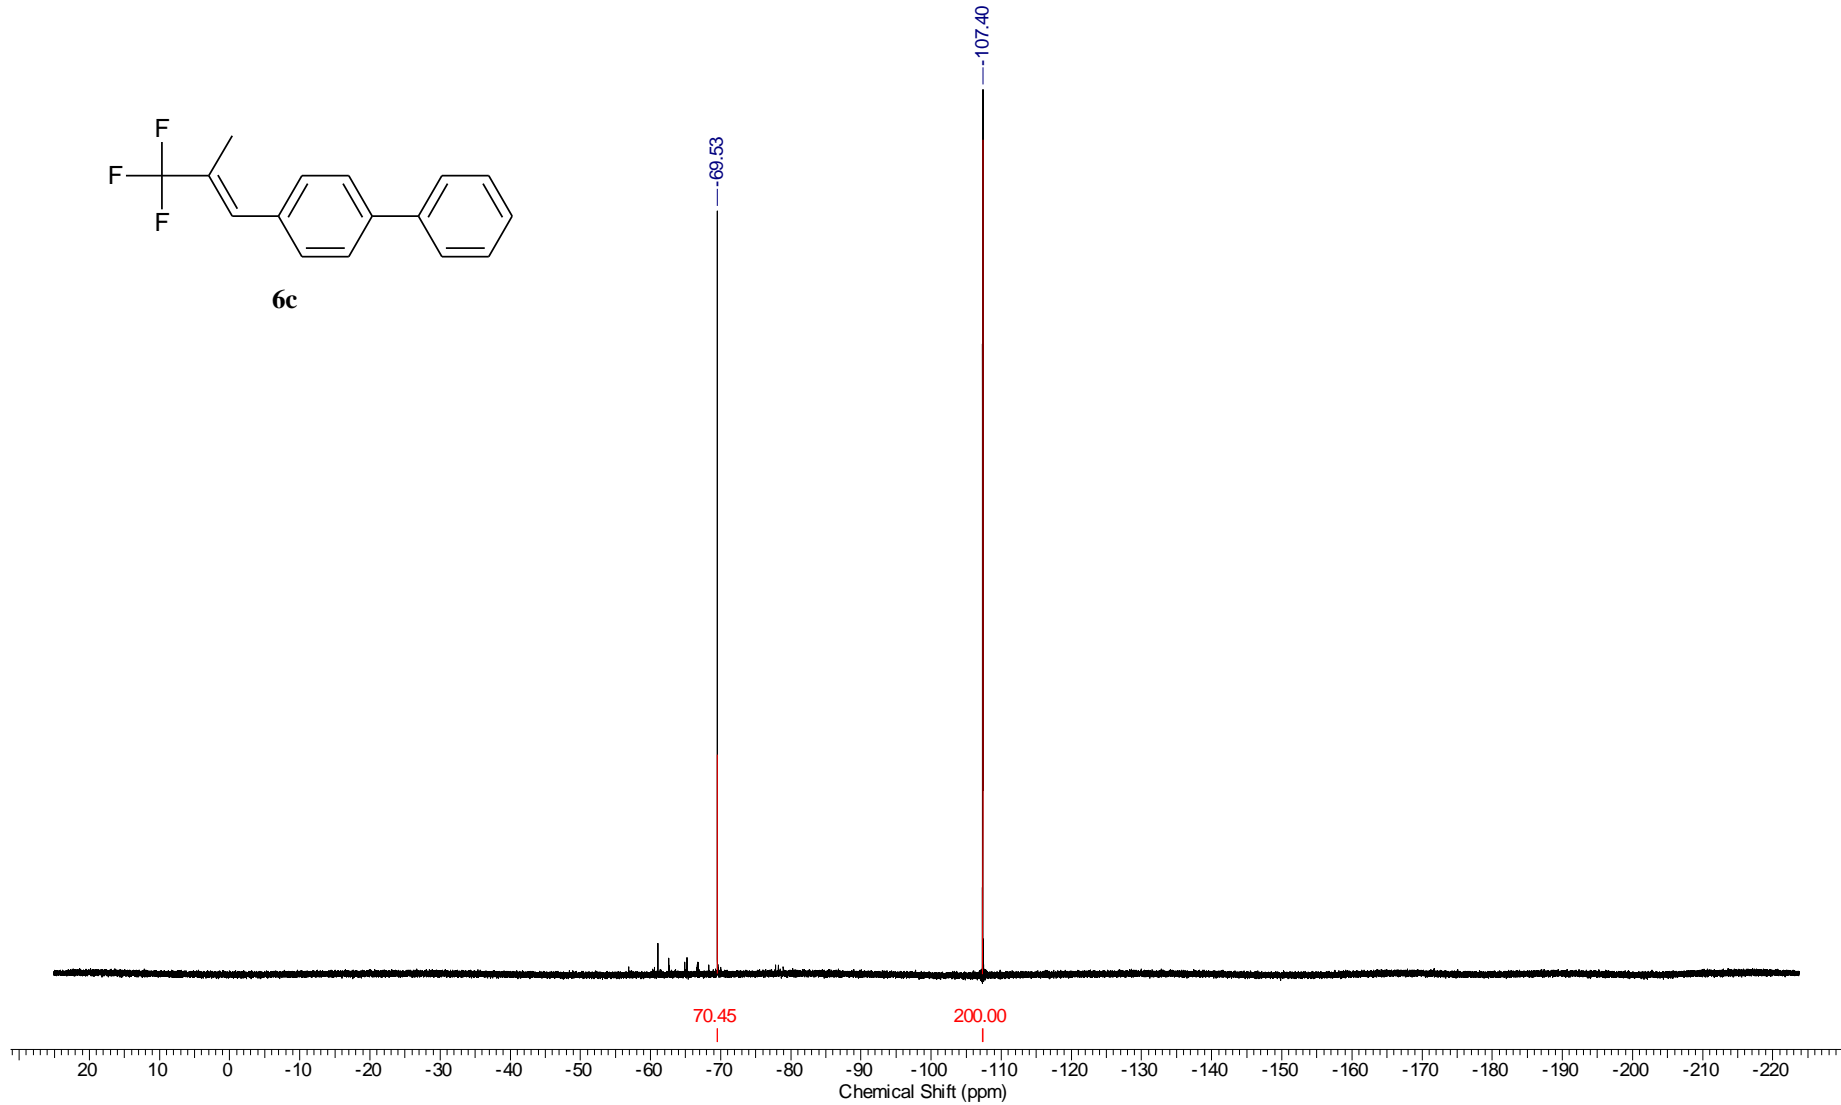

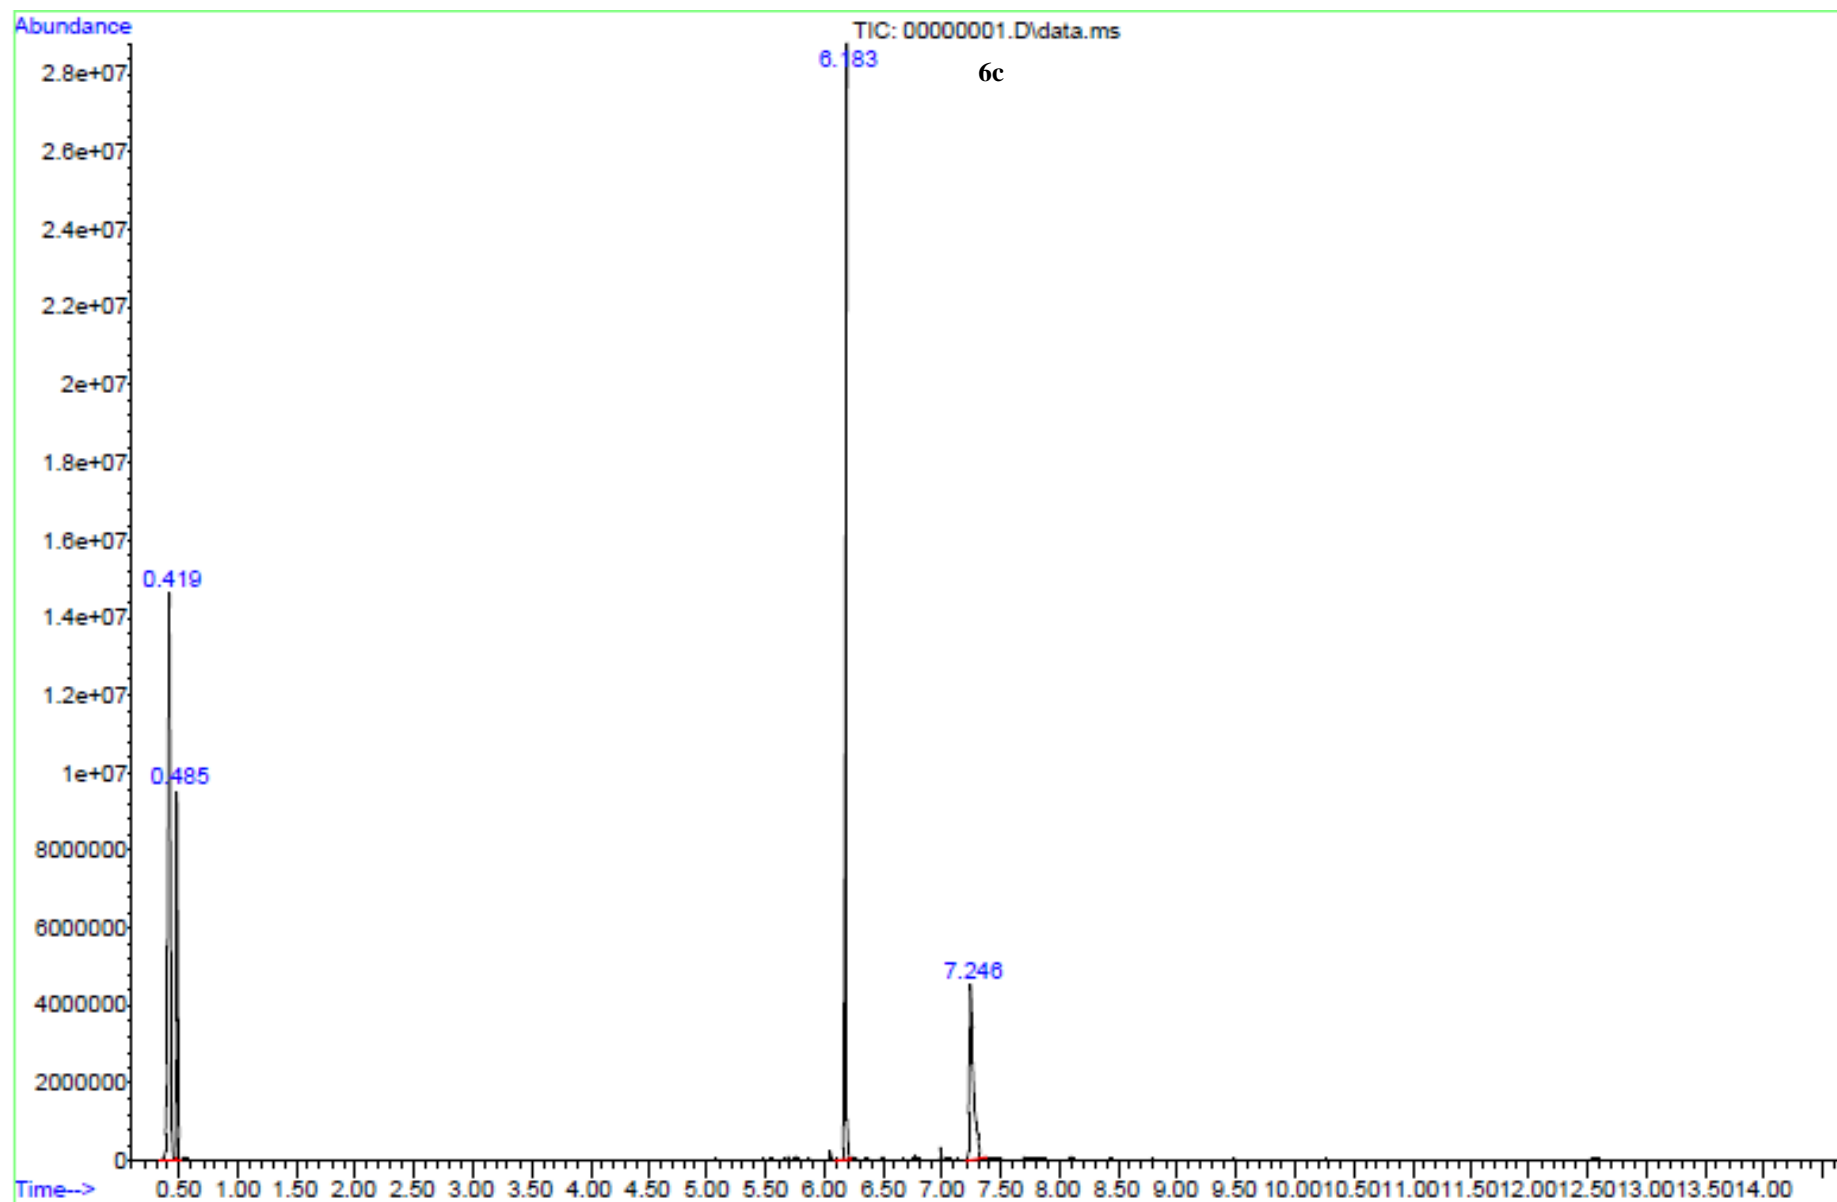



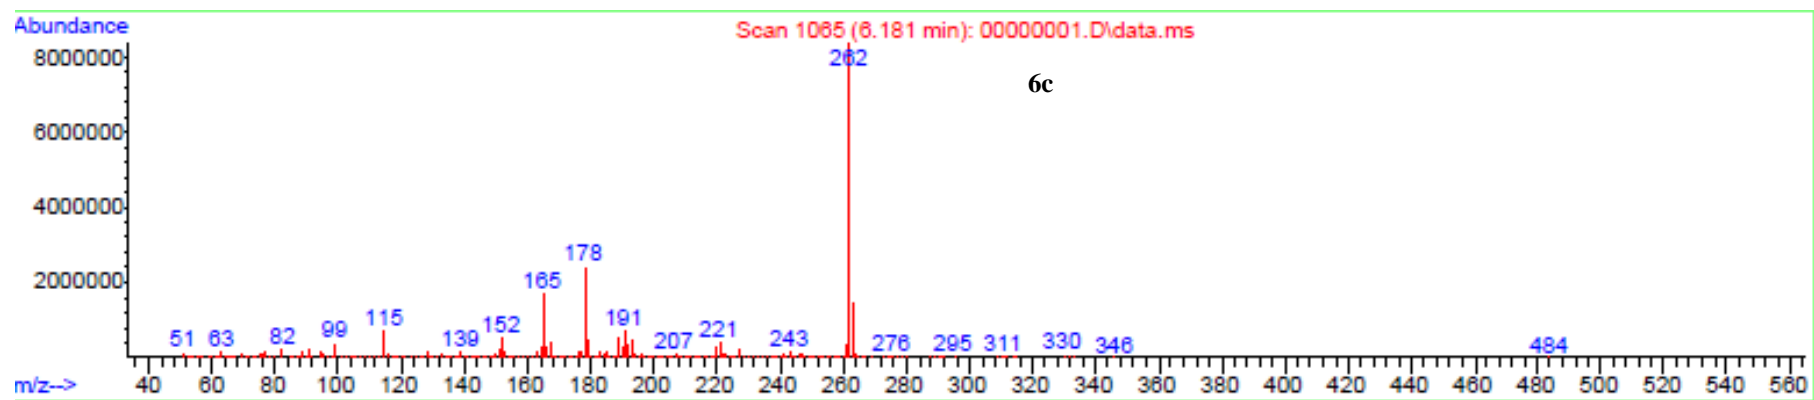

|                       |              |                      |                |                      |         |                        |                     |
|-----------------------|--------------|----------------------|----------------|----------------------|---------|------------------------|---------------------|
| Frequency (MHz)       | 400.40       | Nucleus              | 1H             | Number of Transients | 16      | Origin                 | Bruker BioSpin GmbH |
| Original Points Count | 32768        | Owner                | tibbe_operator | Points Count         | 32768   | SW(cyclical) (Hz)      | 7211.32             |
| Solvent               | CHLOROFORM-d | Spectrum Offset (Hz) | 3395.6414      | Sweep Width (Hz)     | 7211.10 | Temperature (degree C) | 27.000              |

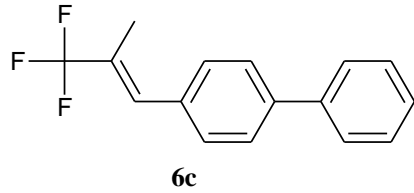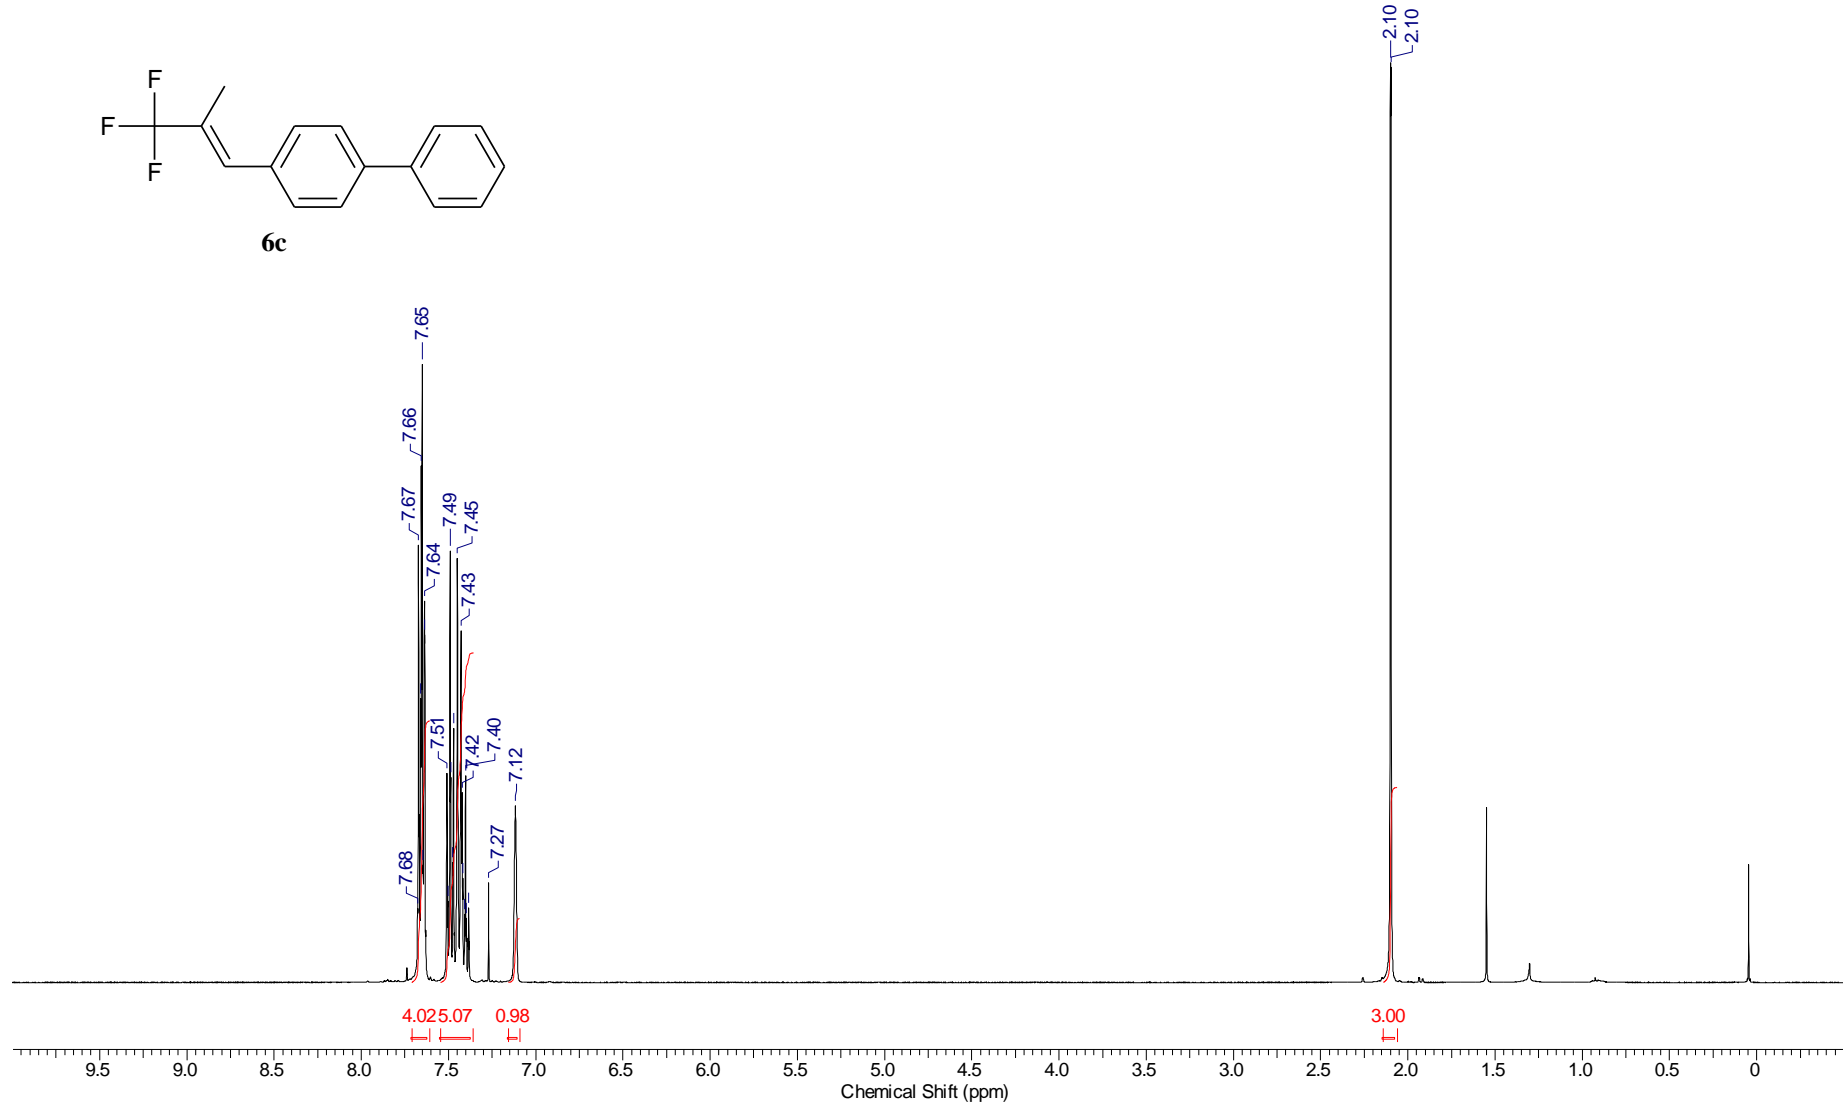

|                              |              |                             |                |                             |          |                               |                     |
|------------------------------|--------------|-----------------------------|----------------|-----------------------------|----------|-------------------------------|---------------------|
| <b>Frequency (MHz)</b>       | 100.69       | <b>Nucleus</b>              | 13C            | <b>Number of Transients</b> | 1024     | <b>Origin</b>                 | Bruker BioSpin GmbH |
| <b>Original Points Count</b> | 32768        | <b>Owner</b>                | tibbe_operator | <b>Points Count</b>         | 32768    | <b>SW(cyclical) (Hz)</b>      | 24037.73            |
| <b>Solvent</b>               | CHLOROFORM-d | <b>Spectrum Offset (Hz)</b> | 10065.0420     | <b>Sweep Width (Hz)</b>     | 24036.99 | <b>Temperature (degree C)</b> | 27.000              |

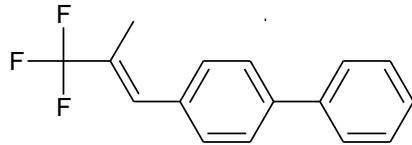

6c

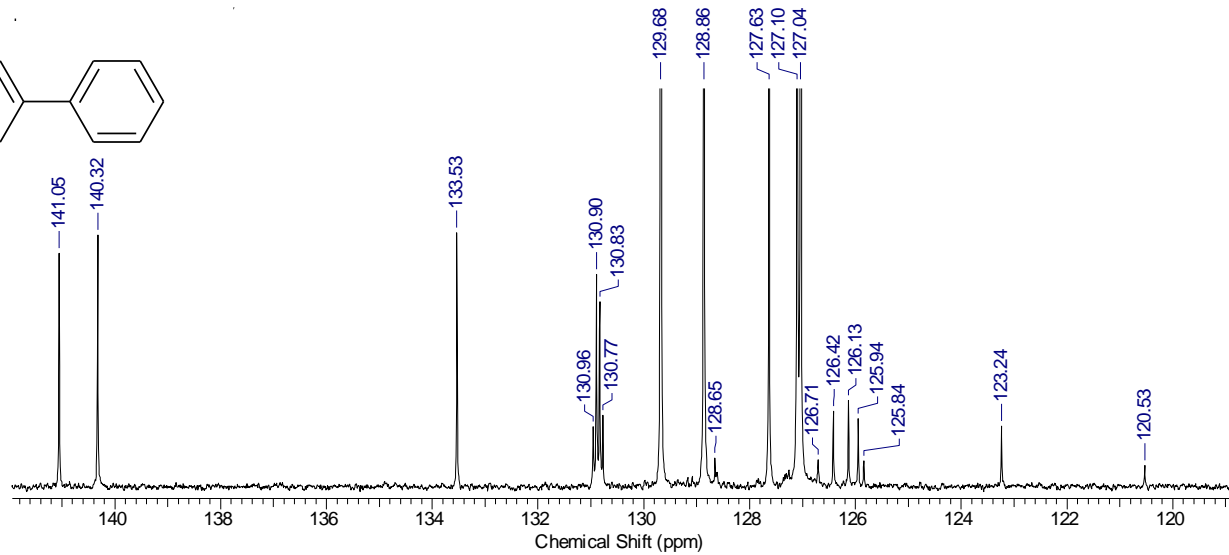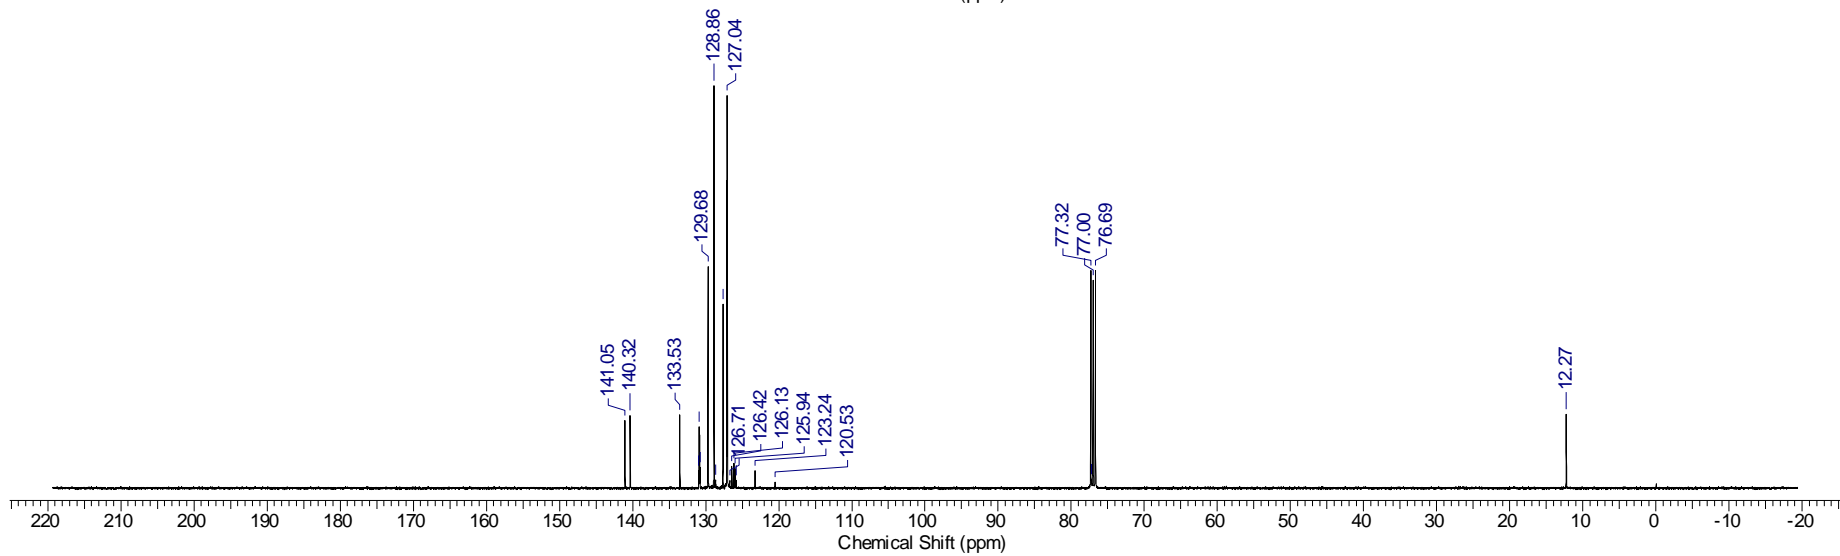

|                       |              |                      |                |          |                      |          |                        |                     |
|-----------------------|--------------|----------------------|----------------|----------|----------------------|----------|------------------------|---------------------|
| Frequency (MHz)       | 100.69       | Nucleus              | 13C            | Dept 135 | Number of Transients | 256      | Origin                 | Bruker BioSpin GmbH |
| Original Points Count | 32768        | Owner                | tibbe_operator |          | Points Count         | 32768    | SW(cyclical) (Hz)      | 24037.73            |
| Solvent               | CHLOROFORM-d | Spectrum Offset (Hz) | 10065.1299     |          | Sweep Width (Hz)     | 24036.99 | Temperature (degree C) | 27.000              |

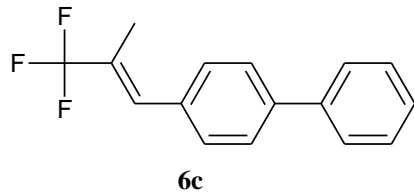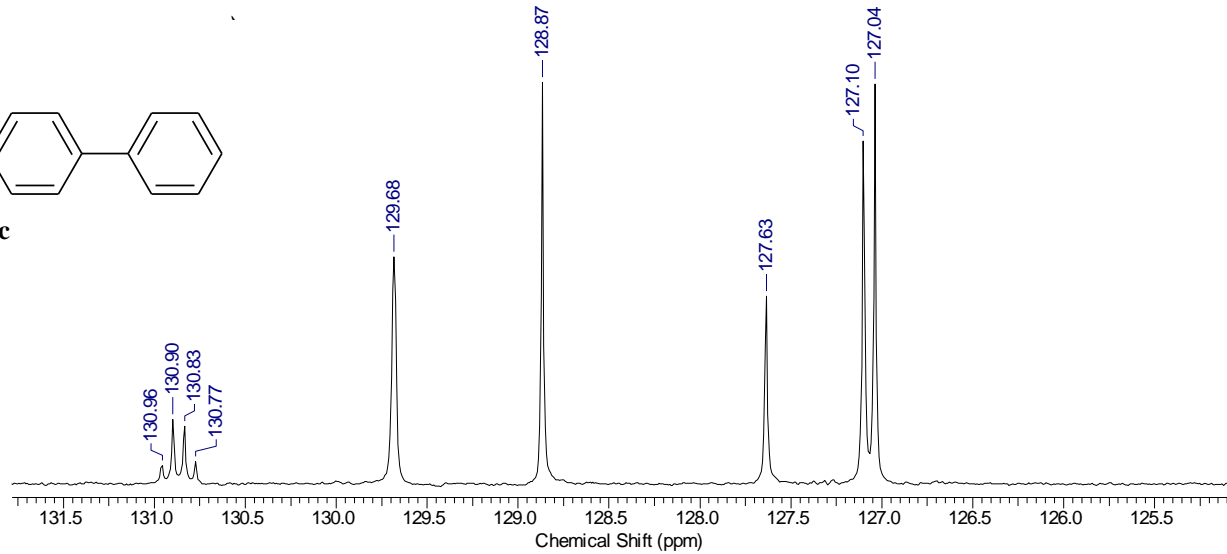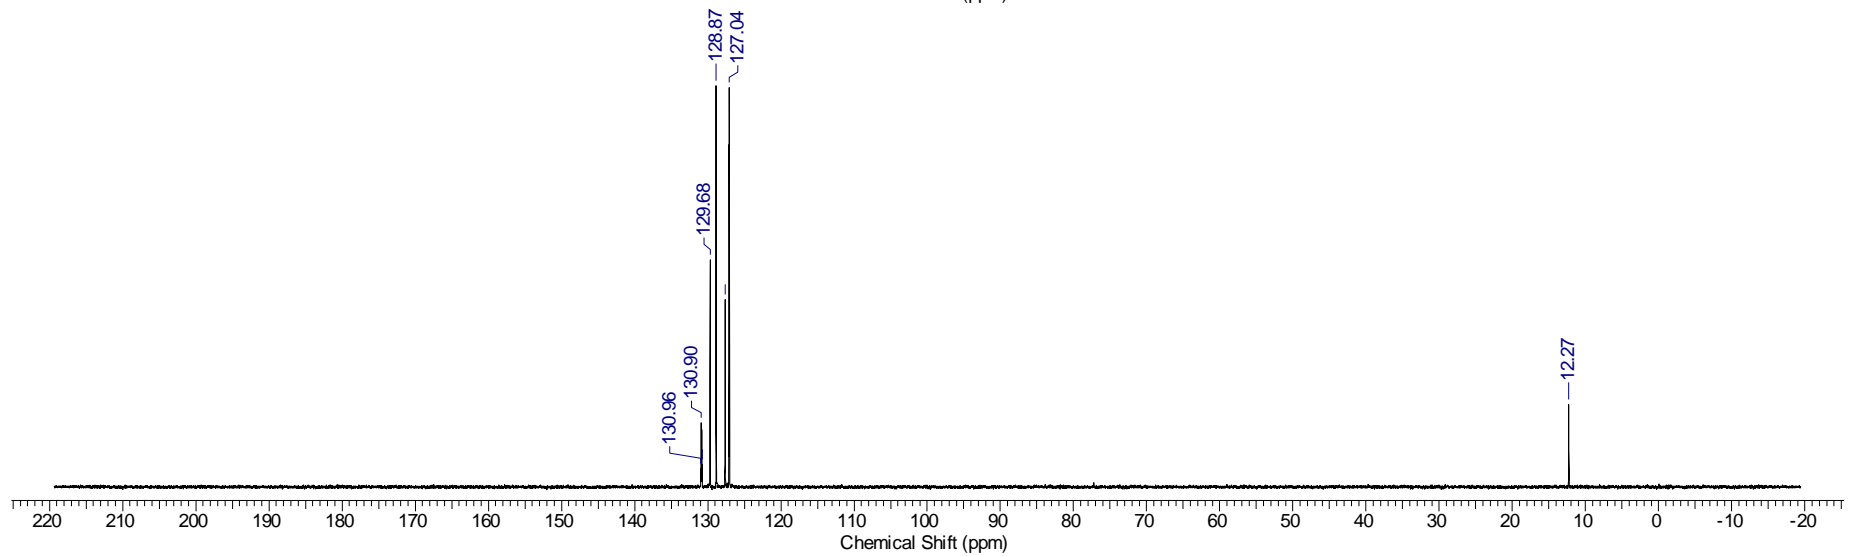

|                       |              |                      |                 |                      |          |                        |                     |
|-----------------------|--------------|----------------------|-----------------|----------------------|----------|------------------------|---------------------|
| Frequency (MHz)       | 376.71       | Nucleus              | <sup>19</sup> F | Number of Transients | 64       | Origin                 | Bruker BioSpin GmbH |
| Original Points Count | 131072       | Owner                | tibbe_operator  | Points Count         | 131072   | SW(cyclical) (Hz)      | 93749.28            |
| Solvent               | CHLOROFORM-d | Spectrum Offset (Hz) | -37758.9258     | Sweep Width (Hz)     | 93748.56 | Temperature (degree C) | 27.000              |

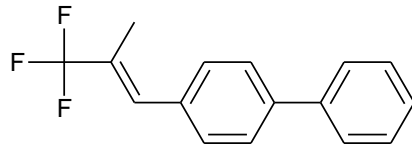

6c

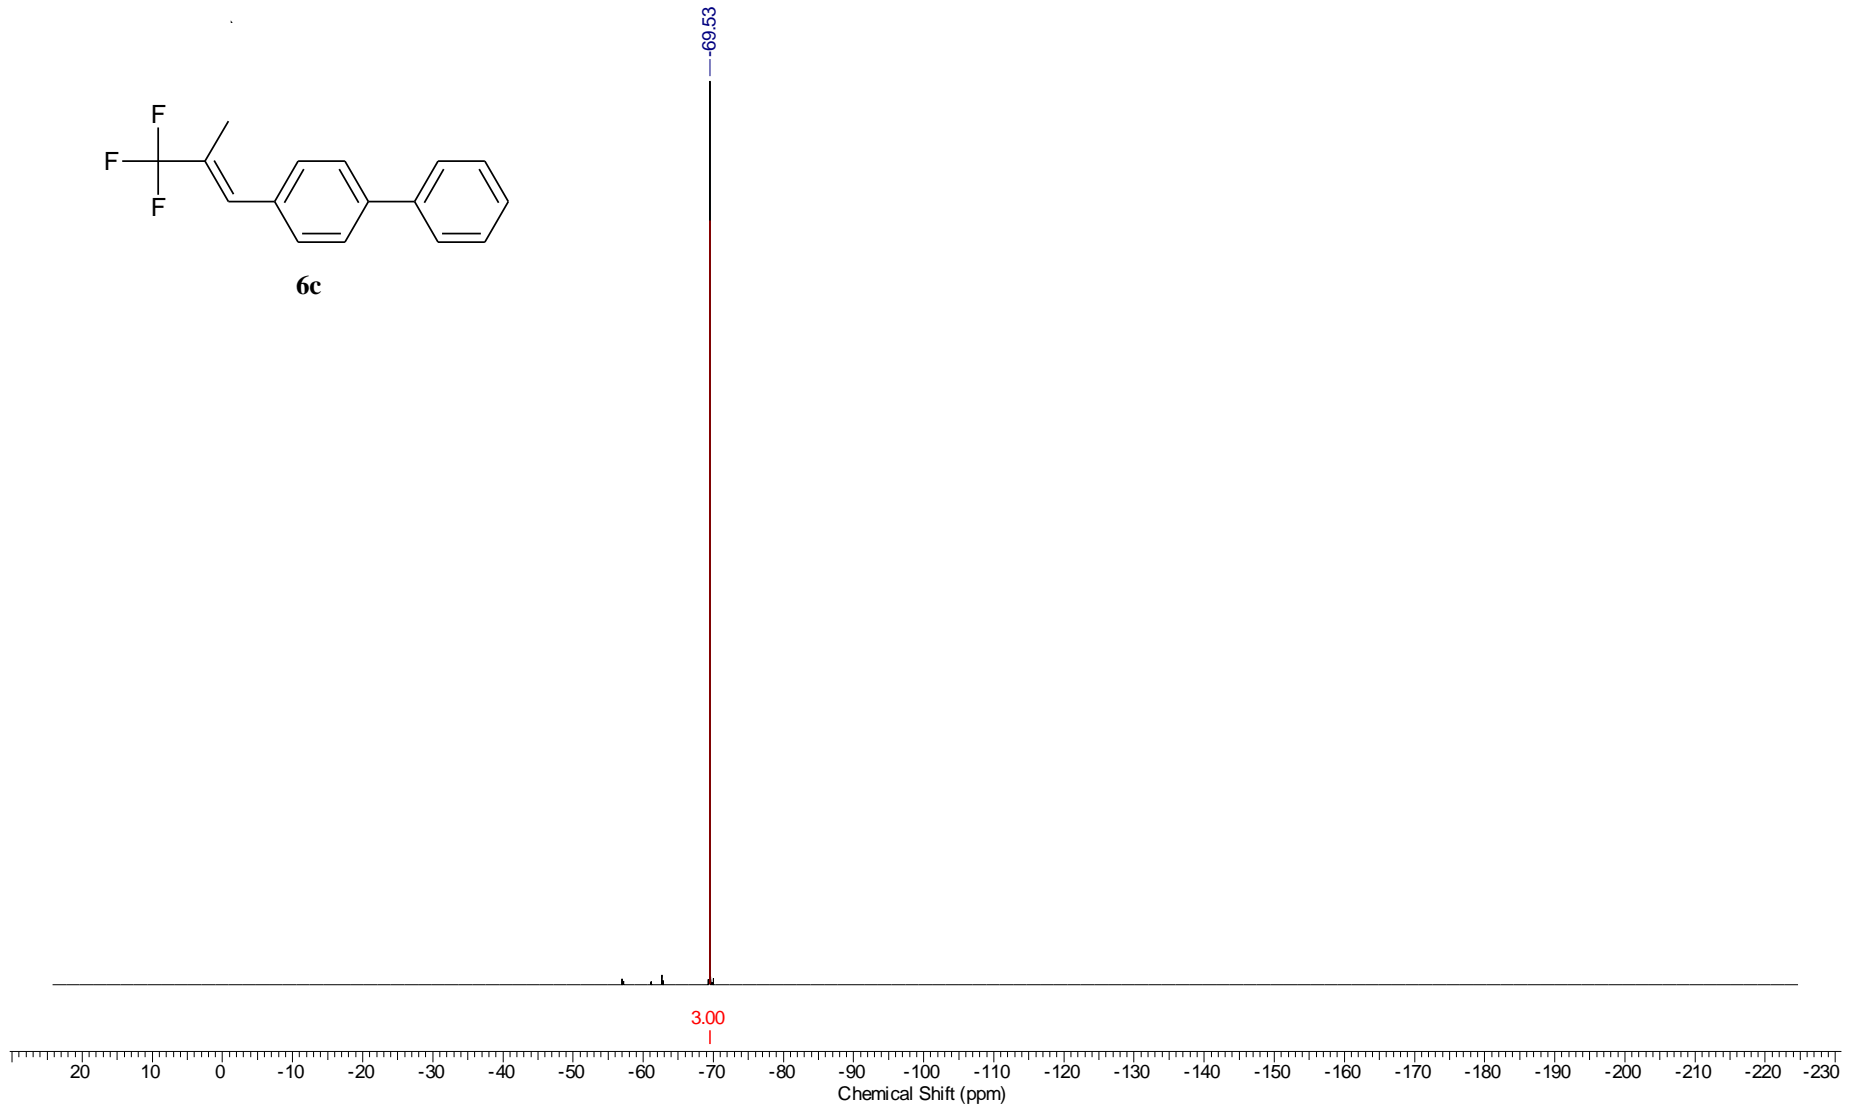

|                       |              |                      |                 |                      |          |                        |                     |
|-----------------------|--------------|----------------------|-----------------|----------------------|----------|------------------------|---------------------|
| Frequency (MHz)       | 376.71       | Nucleus              | <sup>19</sup> F | Number of Transients | 64       | Origin                 | Bruker BioSpin GmbH |
| Original Points Count | 131072       | Owner                | tibbe_operator  | Points Count         | 131072   | SW(cyclical) (Hz)      | 93749.28            |
| Solvent               | CHLOROFORM-d | Spectrum Offset (Hz) | -37451.1758     | Sweep Width (Hz)     | 93748.56 | Temperature (degree C) | 27.000              |

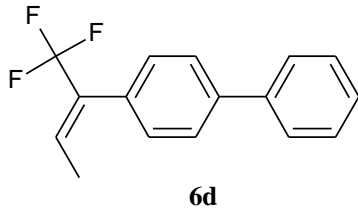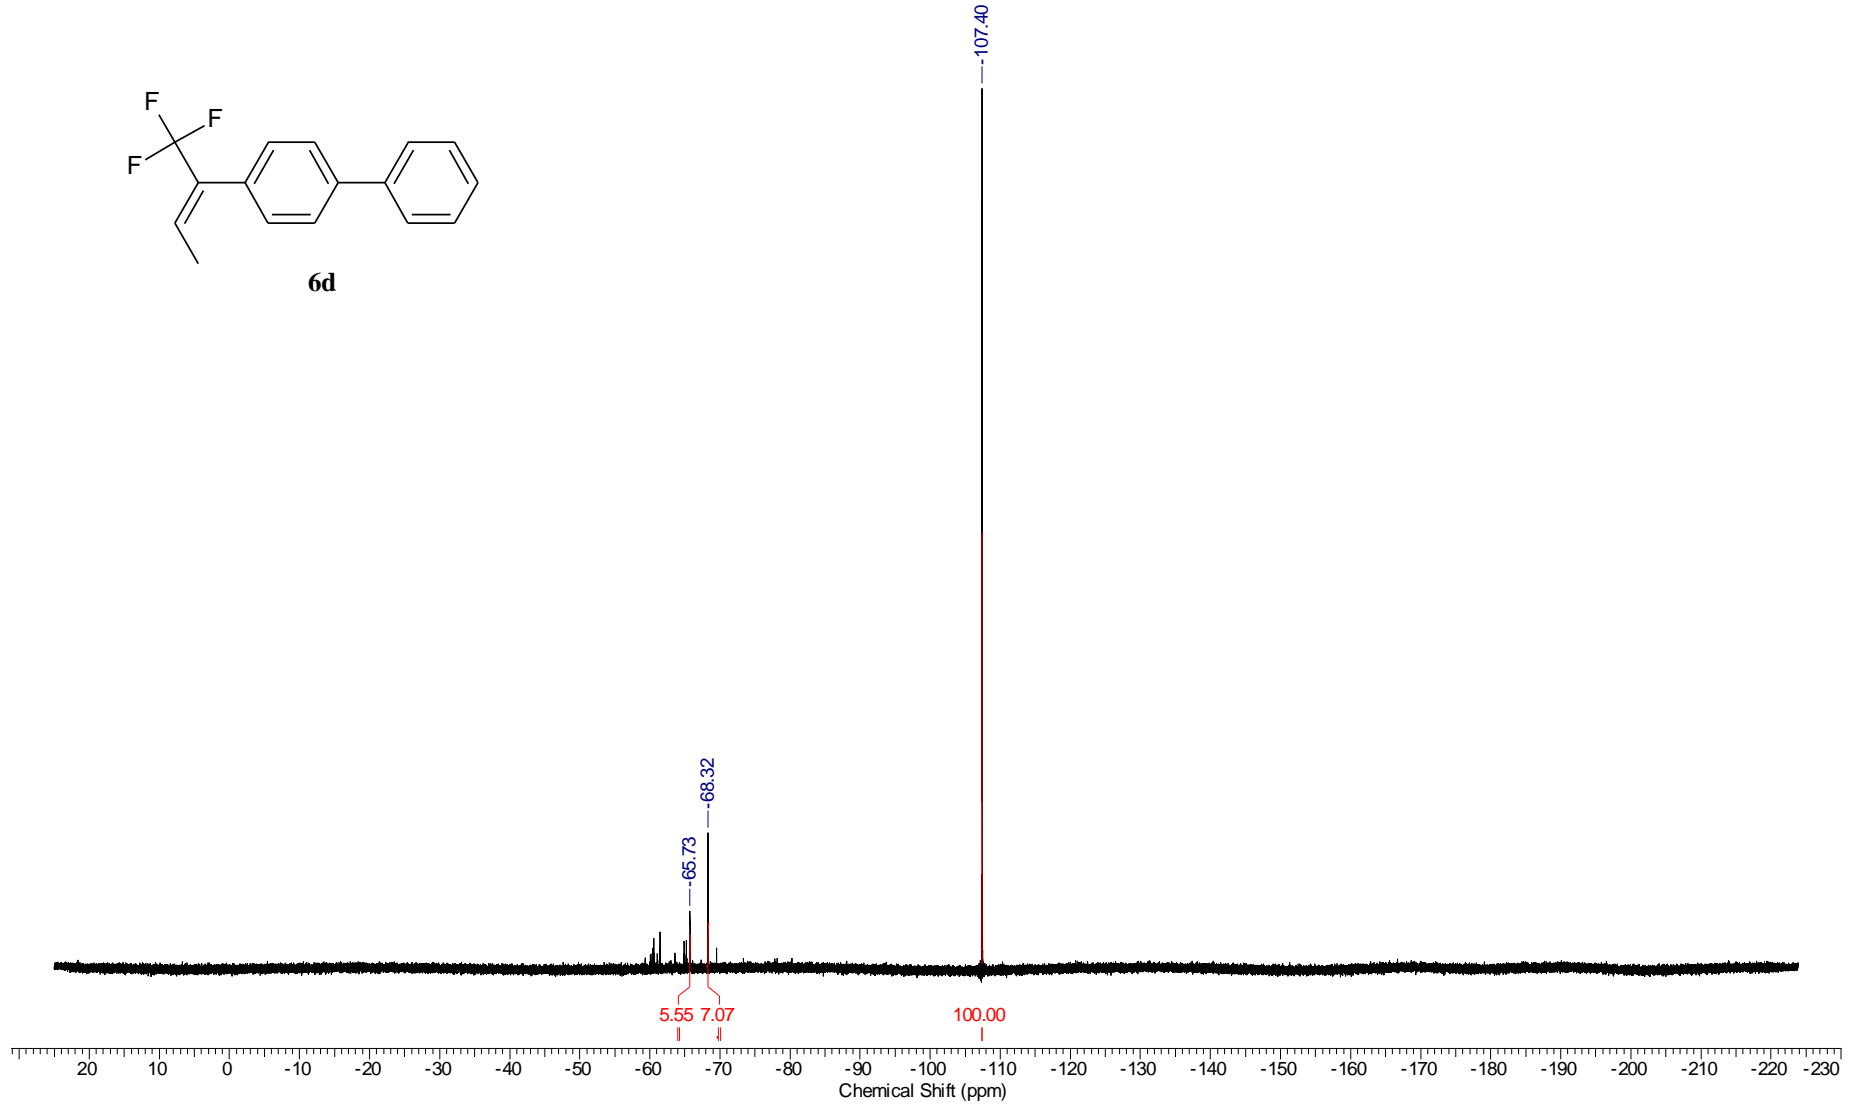

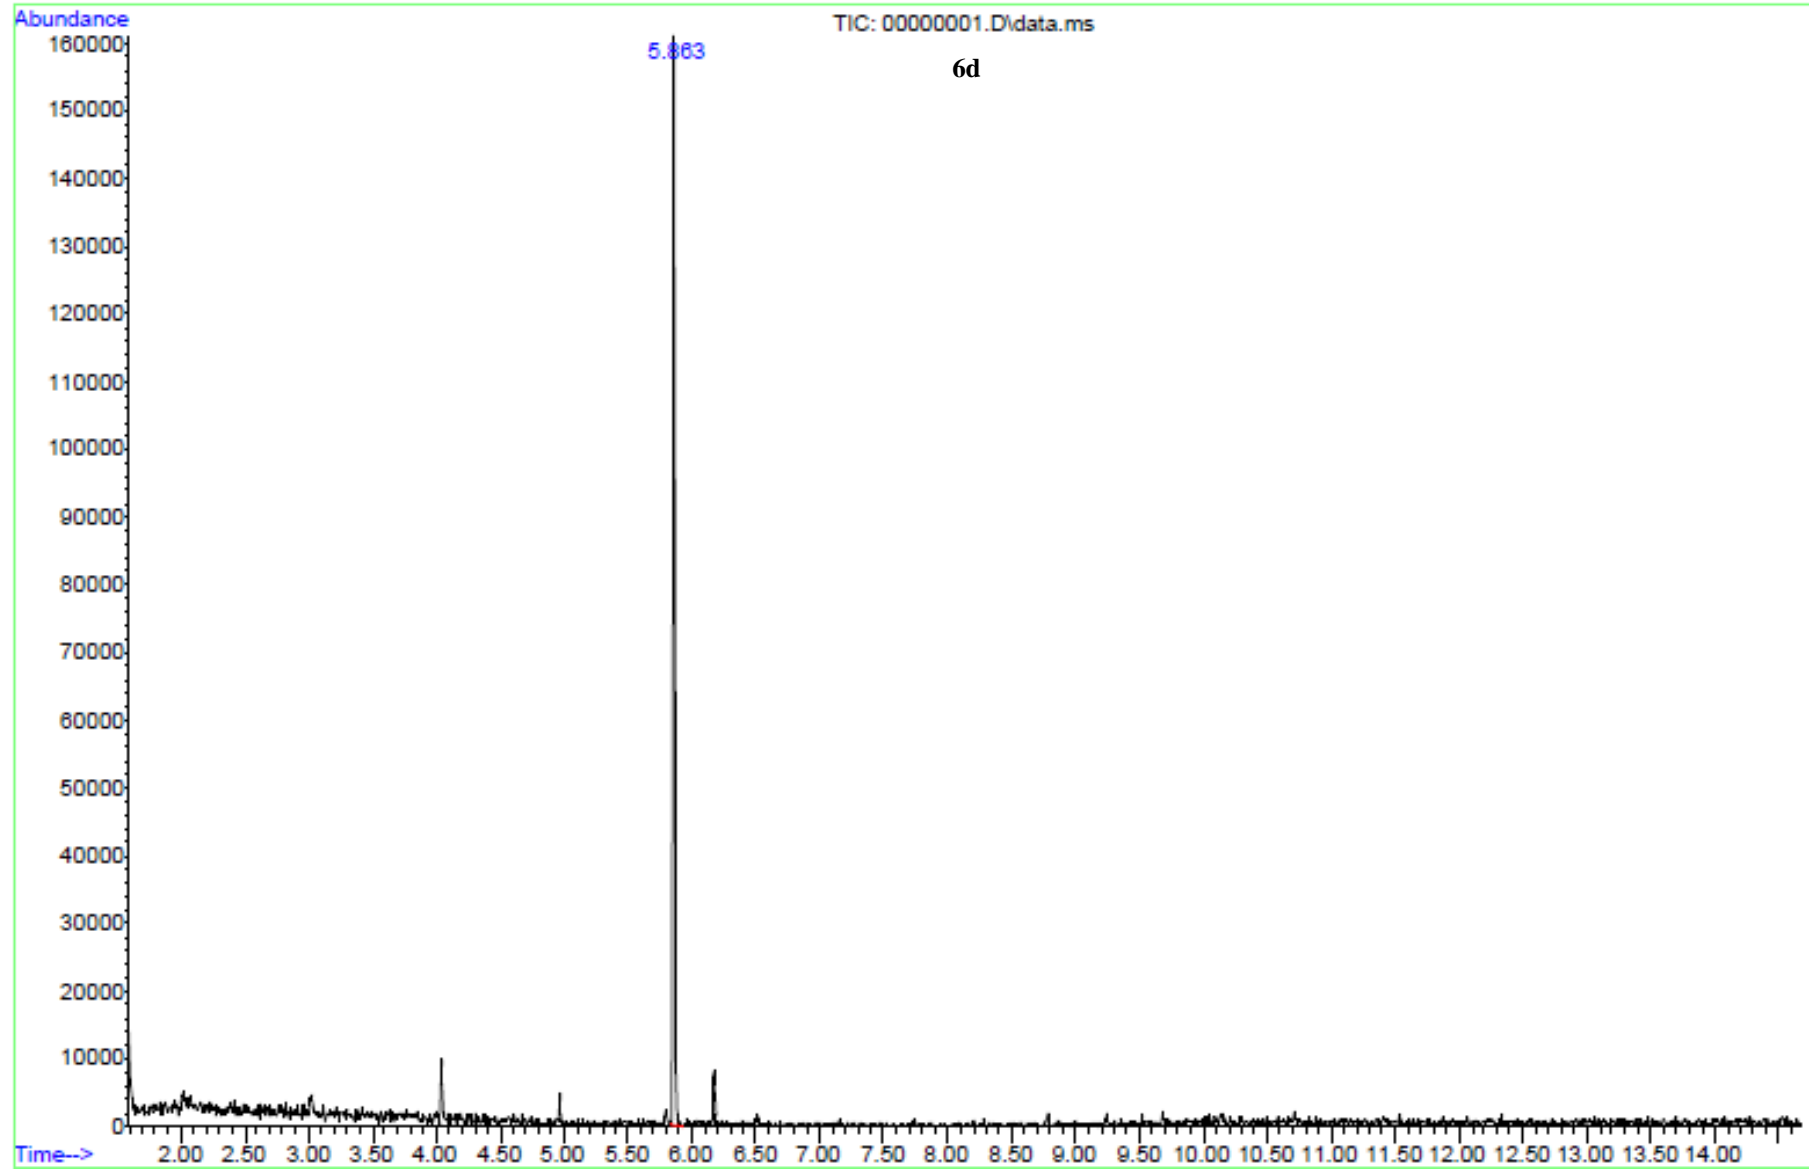

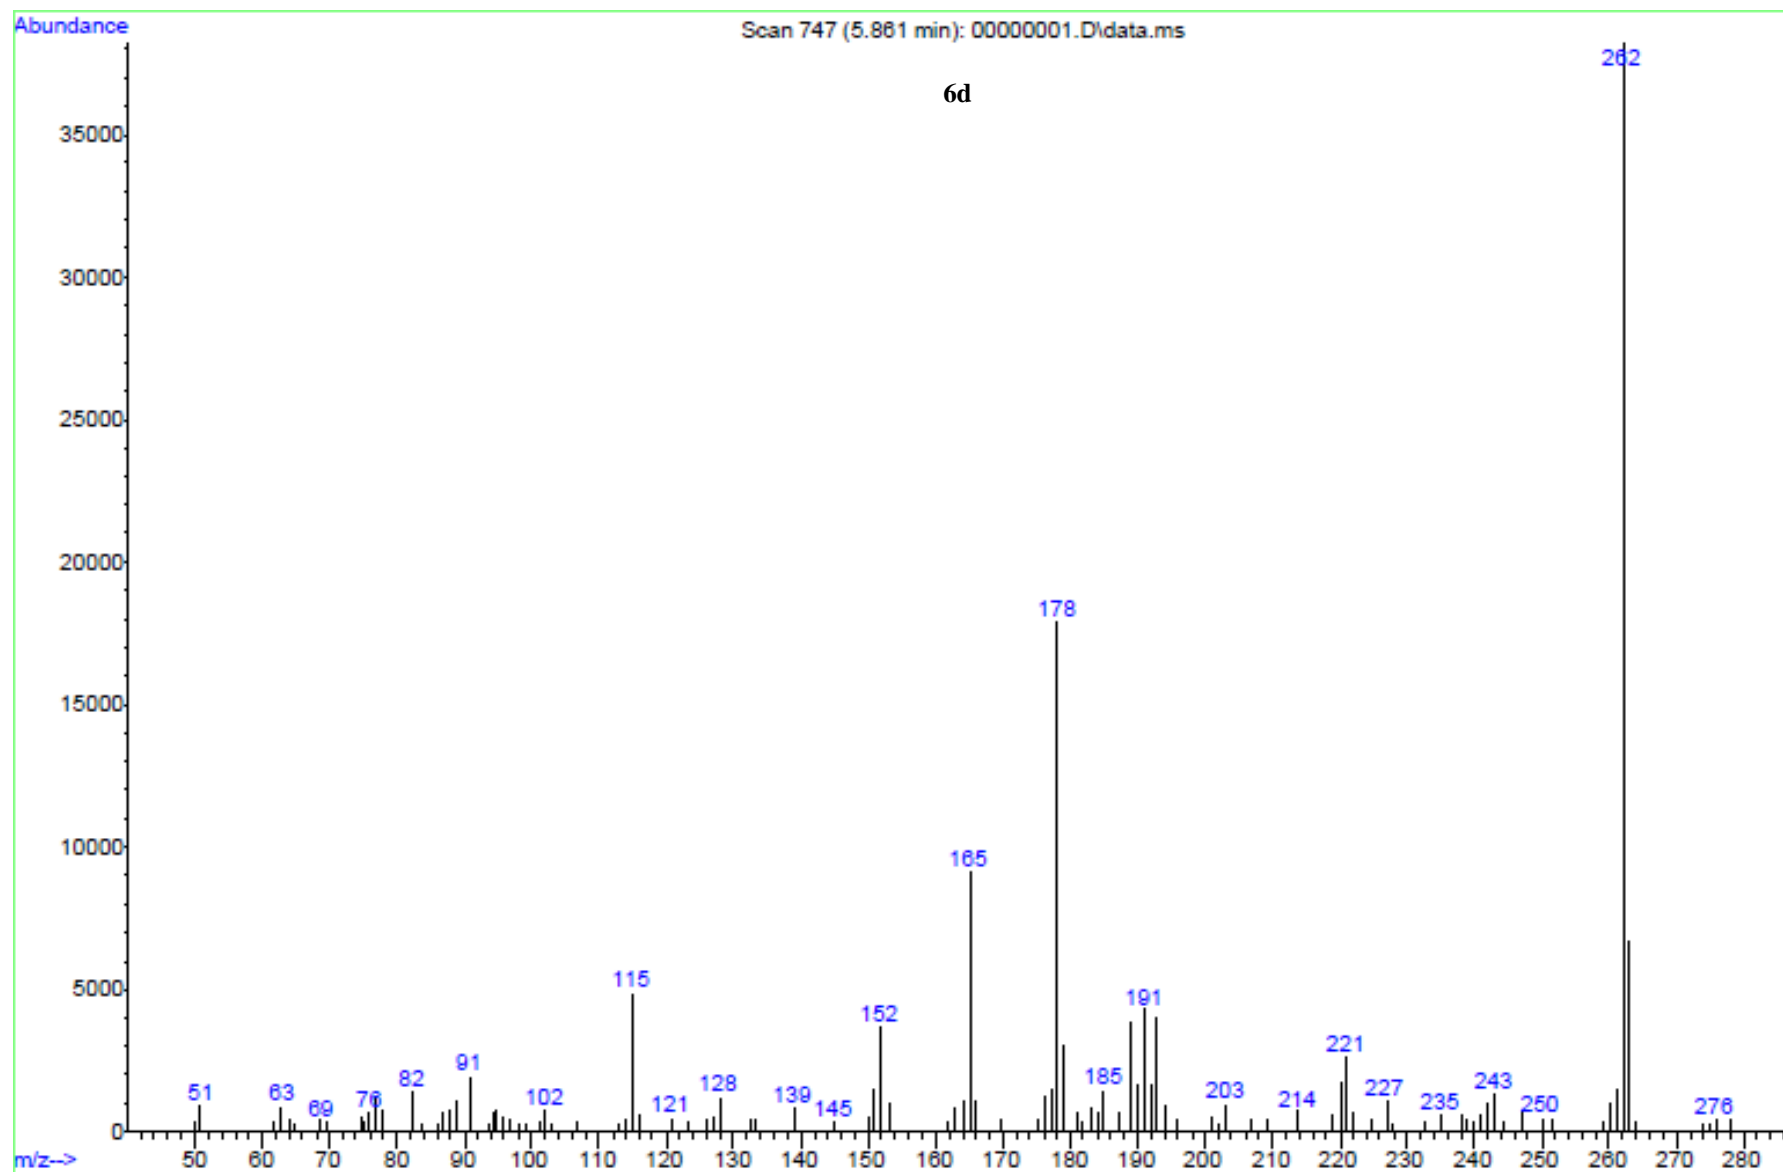



|                       |              |                      |                |                      |         |                        |                     |
|-----------------------|--------------|----------------------|----------------|----------------------|---------|------------------------|---------------------|
| Frequency (MHz)       | 400.40       | Nucleus              | 1H             | Number of Transients | 16      | Origin                 | Bruker BioSpin GmbH |
| Original Points Count | 32768        | Owner                | tibbe_operator | Points Count         | 32768   | SW(cyclical) (Hz)      | 7211.32             |
| Solvent               | CHLOROFORM-d | Spectrum Offset (Hz) | 3395.6411      | Sweep Width (Hz)     | 7211.10 | Temperature (degree C) | 27.000              |

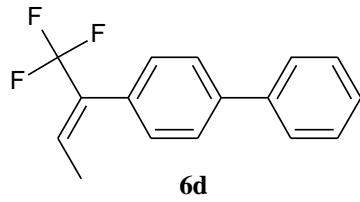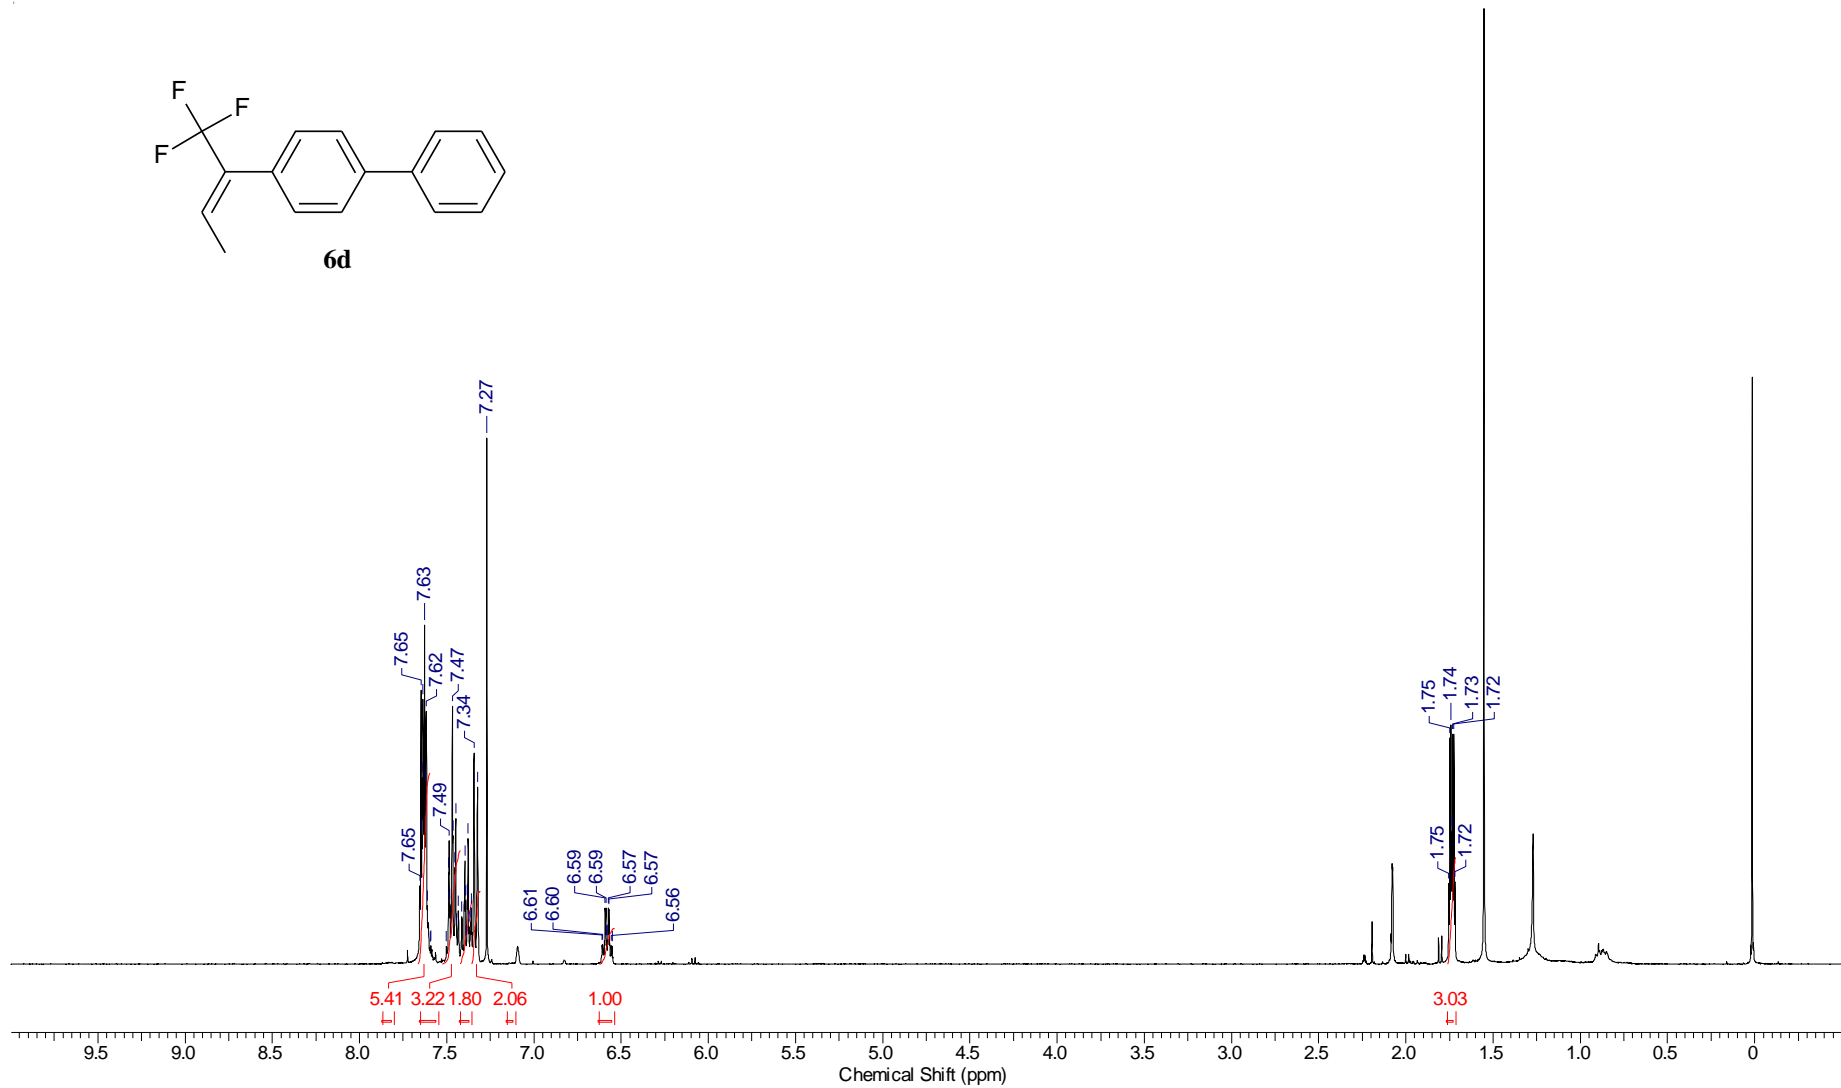

|                       |              |                      |                 |                      |          |                        |                     |
|-----------------------|--------------|----------------------|-----------------|----------------------|----------|------------------------|---------------------|
| Frequency (MHz)       | 100.69       | Nucleus              | <sup>13</sup> C | Number of Transients | 1024     | Origin                 | Bruker BioSpin GmbH |
| Original Points Count | 32768        | Owner                | tibbe_operator  | Points Count         | 32768    | SW(cyclical) (Hz)      | 24037.73            |
| Solvent               | CHLOROFORM-d | Spectrum Offset (Hz) | 10067.2422      | Sweep Width (Hz)     | 24036.99 | Temperature (degree C) | 27.000              |

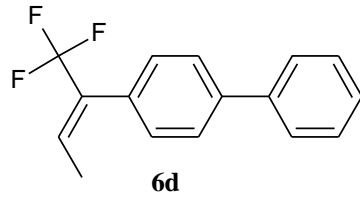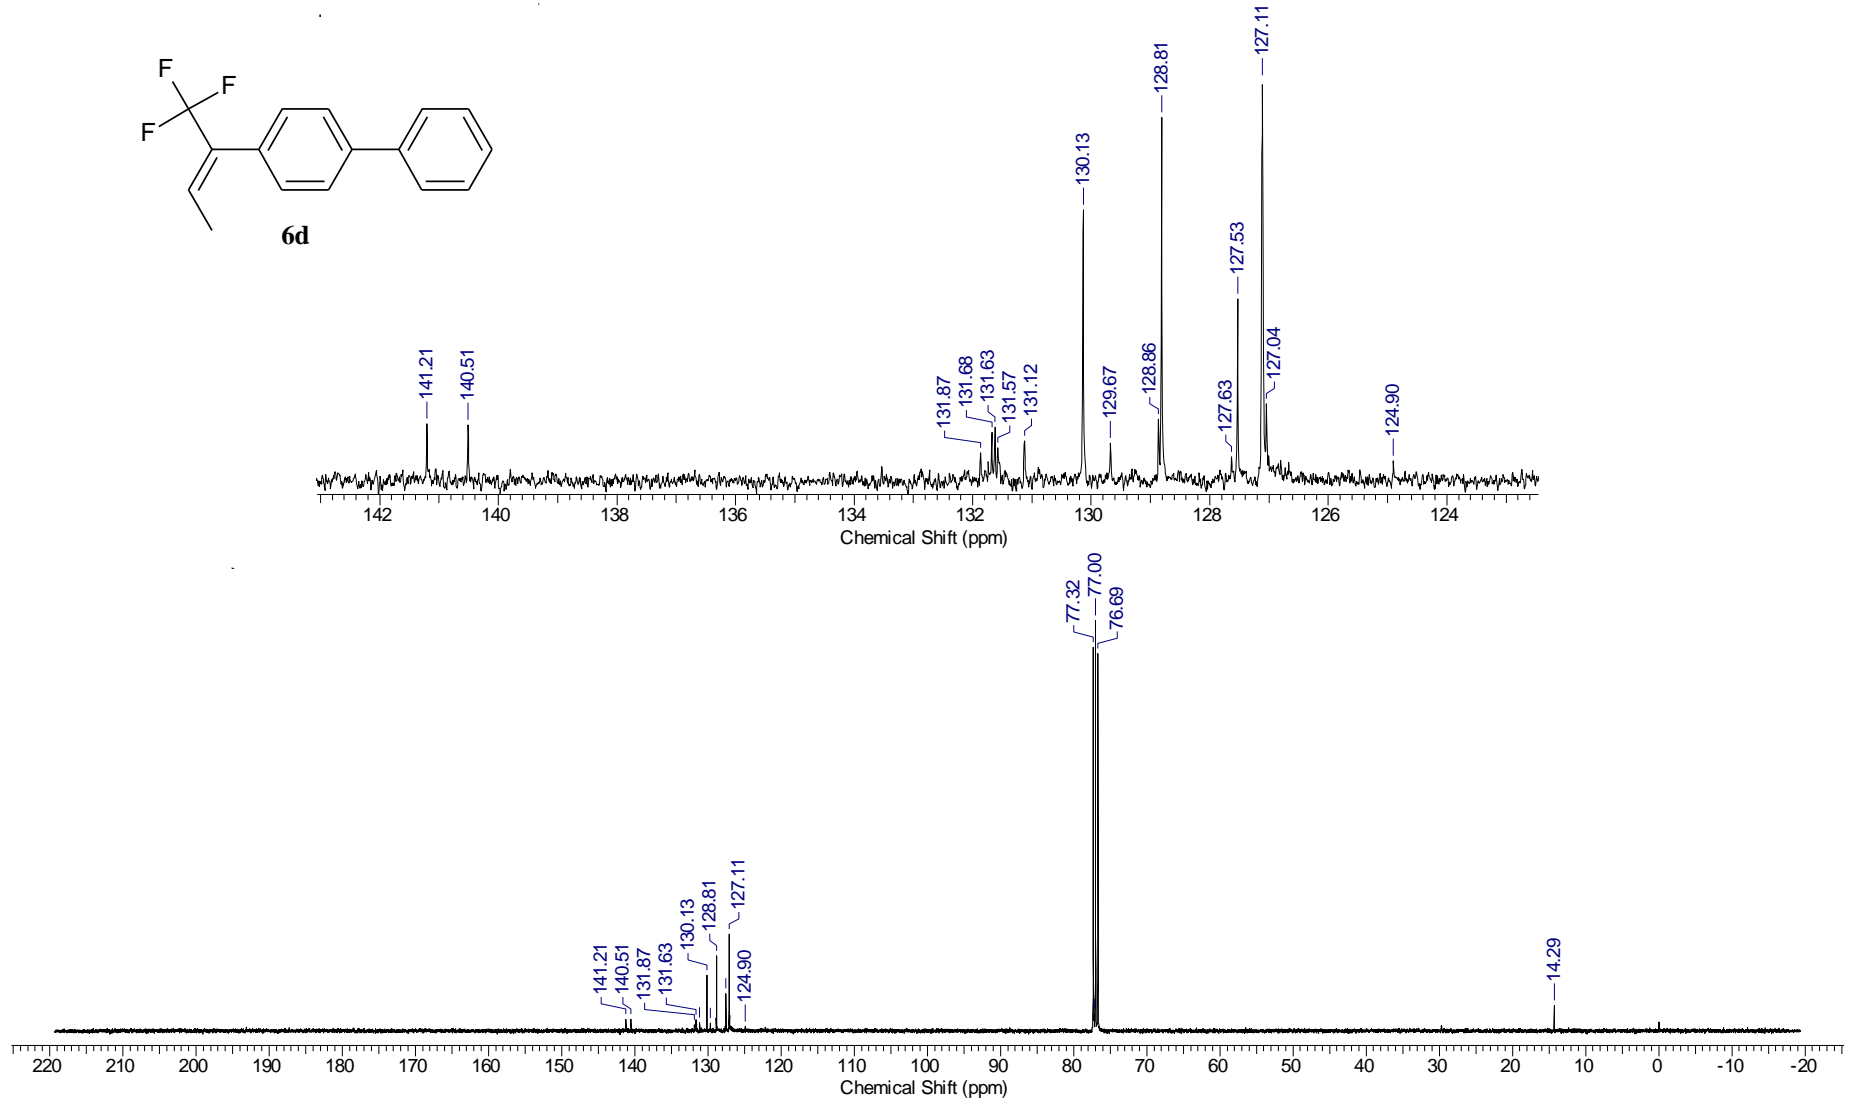

|                       |              |                      |                          |                      |          |                        |                     |
|-----------------------|--------------|----------------------|--------------------------|----------------------|----------|------------------------|---------------------|
| Frequency (MHz)       | 100.69       | Nucleus              | <sup>13</sup> C Dept 135 | Number of Transients | 1024     | Origin                 | Bruker BioSpin GmbH |
| Original Points Count | 32768        | Owner                | tibbe_operator           | Points Count         | 32768    | SW(cyclical) (Hz)      | 24037.73            |
| Solvent               | CHLOROFORM-d | Spectrum Offset (Hz) | 10067.2422               | Sweep Width (Hz)     | 24036.99 | Temperature (degree C) | 27.000              |

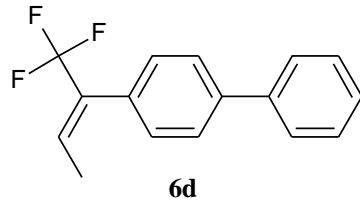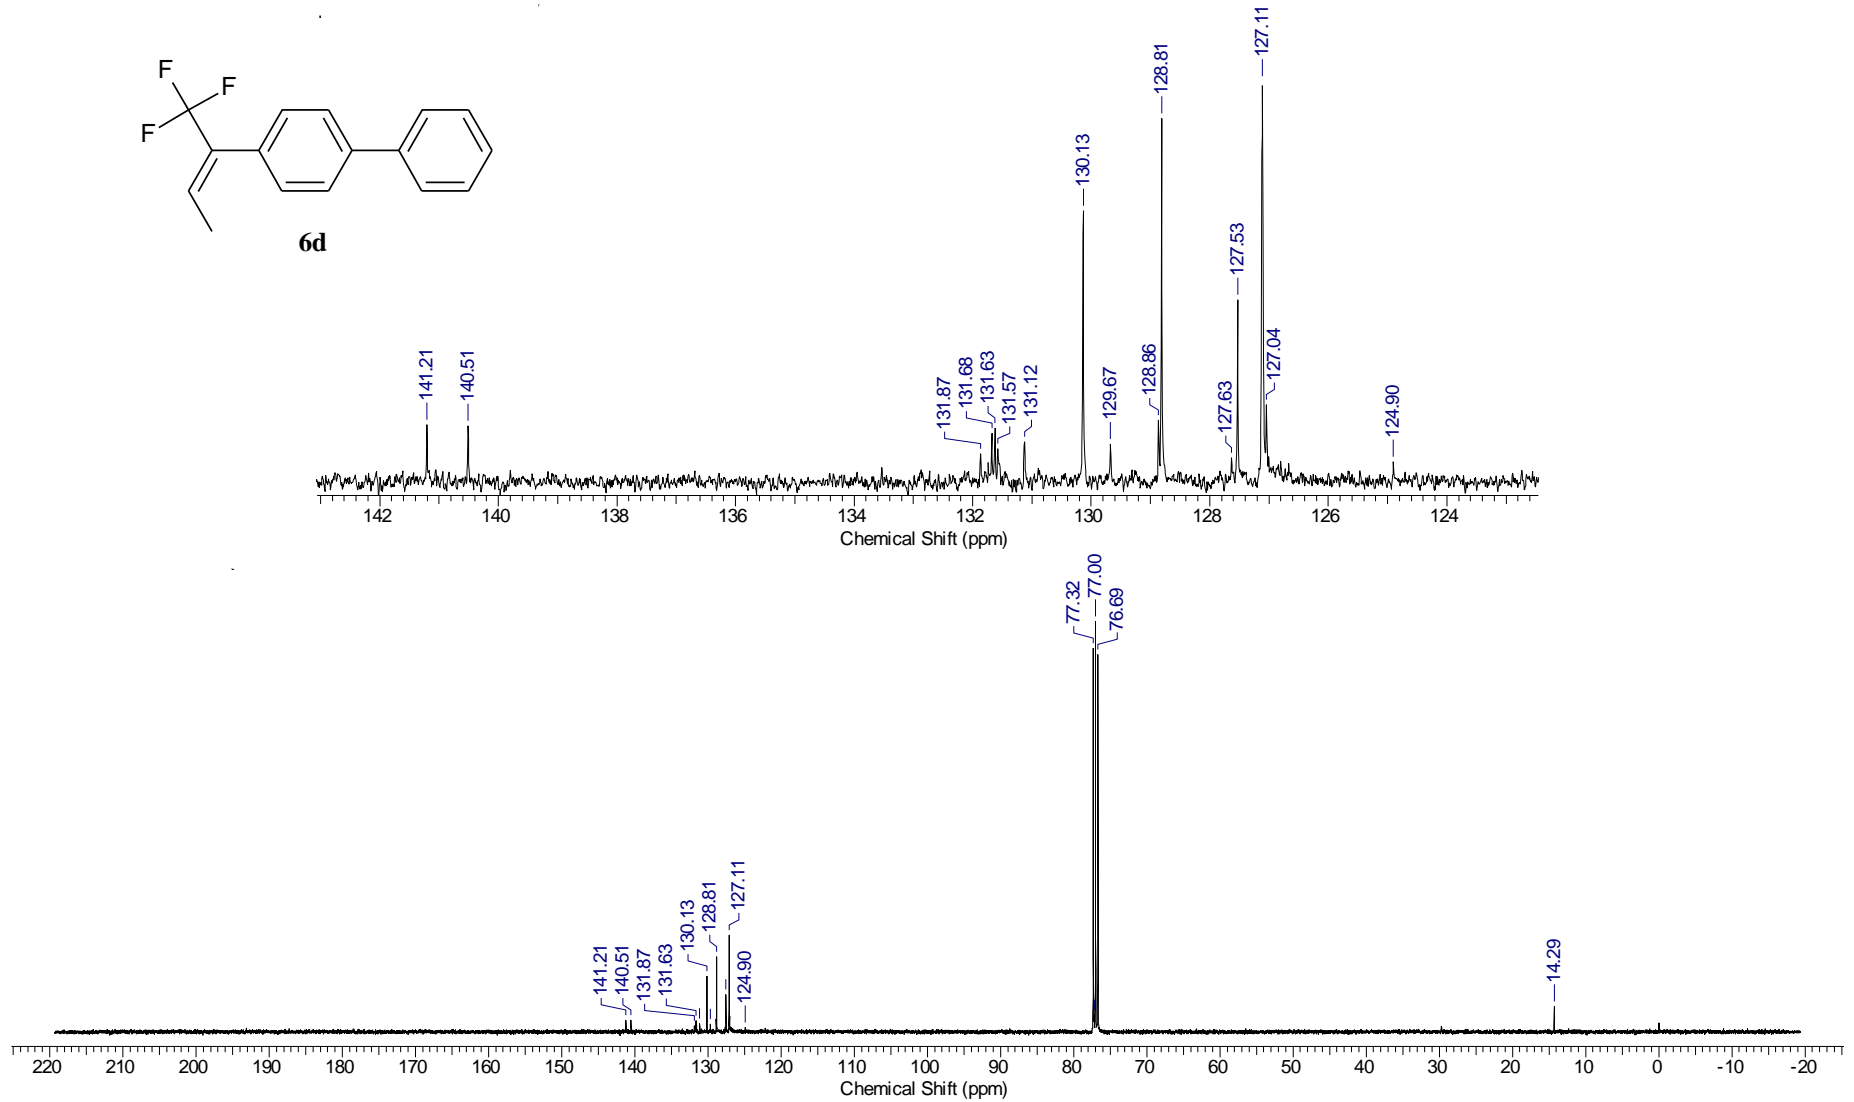

|                              |              |                             |                 |                             |          |                               |                     |
|------------------------------|--------------|-----------------------------|-----------------|-----------------------------|----------|-------------------------------|---------------------|
| <b>Frequency (MHz)</b>       | 376.71       | <b>Nucleus</b>              | <sup>19</sup> F | <b>Number of Transients</b> | 64       | <b>Origin</b>                 | Bruker BioSpin GmbH |
| <b>Original Points Count</b> | 131072       | <b>Owner</b>                | tibbe_operator  | <b>Points Count</b>         | 131072   | <b>SW(cyclical) (Hz)</b>      | 93749.28            |
| <b>Solvent</b>               | CHLOROFORM-d | <b>Spectrum Offset (Hz)</b> | -37760.7734     | <b>Sweep Width (Hz)</b>     | 93748.56 | <b>Temperature (degree C)</b> | 27.000              |

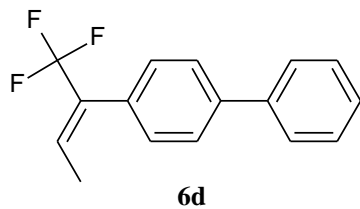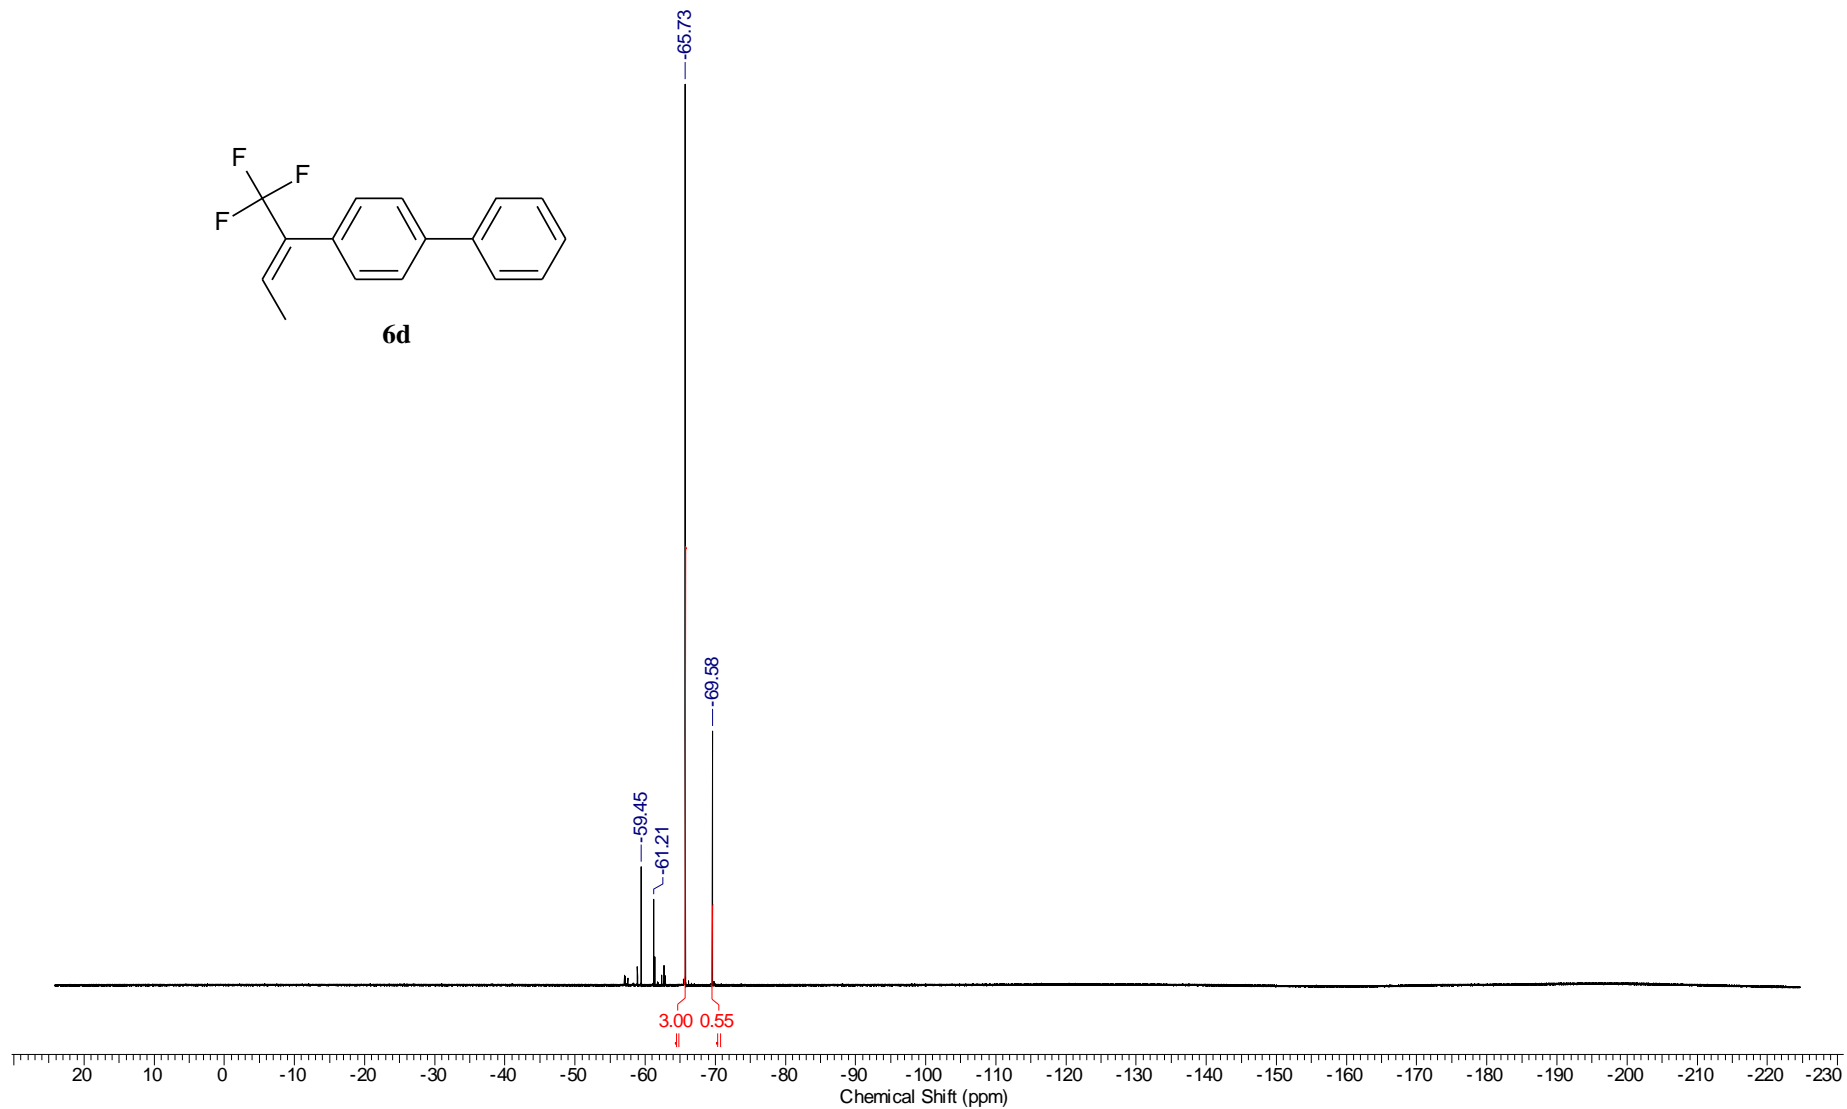

Supplement: NIHMS542612-supplement-1_si_001.pdf [file NIHMS542612-supplement-1_si_001.pdf]
